# Supplementary material for: Common CHD8 Genomic Targets Contrast With Model-Specific Transcriptional Impacts of CHD8 Haploinsufficiency
Source: Front Mol Neurosci. 2019 Jan 14;11:481. doi: 10.3389/fnmol.2018.00481 (PMC6339895; doi:10.3389/fnmol.2018.00481)
Supplement: TABLE S2 — Normalized enrichment scores for all analyzed GSEA gene ontology and pathway terms for each RNA-seq dataset. [file Table_2.xlsx]

## Sheet: GSEA
NAME	Cotney_Full	Cotney_shCHD8.C	Cotney_shCHD8.G	Durak_Full	Durak_shCHD8.1	Durak_shCHD8.2	Gompers_E12.5	Gompers_E14.5	Gompers_E17.5	Gompers_Full	Gompers_P0	Gompers_P56	Jung_21_Brain_1	Jung_21_Brain_2	Jung_21_Brain	Jung_46_Brain_1	Jung_46_Brain_2	Jung_46_Brain	Jung_46_Hippocampus_1	Jung_46_Hippocampus_2	Jung_46_Hippocampus	Jung_Full	Katayama_E10	Katayama_E12	Katayama_E14	Katayama_E16	Katayama_E18	Katayama_Full	Katayama_P91	Platt_Amyg	Platt_Ctx	Platt_Full	Platt_Hipp	Platt_Hyp	Platt_NucAcc	Platt_Striatum	Platt_VTA	Shen_RN2_sgCHD8	Shen_RN2_shCHD8	Suetterlin_12.5	Suetterlin_26	Suetterlin_Full	Sugathan_Full	Wang_Neuron	Wang_NPC	Wang_Organoid	Wilkinson_siCHD8
ABBUD_LIF_SIGNALING_1_DN_Down	1	1	1	1	1	1	1	1	1.1468	1.08653	1.29023	1.31903	1	1	1	1	1	1	1.09947	1	1	1	1	1.12318	1	1	1	1	1	1	1.22041	1	1	1	1	1	1	1	1	1	1.39194	1.10702	1	1	1.37878	1	1
ABBUD_LIF_SIGNALING_1_DN_Up	1	1	1	1	1	1	1.3287	1	1	1	1	1	1	1.02347	1	1.09239	1	1.09913	1	1	1	1	1	1	1	1	1	1	1.01532	1	1	1	1	1	1	1	1.87625	1	1	1.0958	1	1	1	1	1	1	1
ABBUD_LIF_SIGNALING_1_UP_Down	1.23289	1	1.49463	1	1	1	1	1	1.18638	1	1	1	1	1	1	1	1	1	1.17227	1	1	1	1	1	1.05366	1.10891	1	1	1	1	1	1.22457	1	1.20684	1.69775	1.36411	1.20293	1	1	1	1.73676	1.4229	1.50444	1	1	1	1
ABBUD_LIF_SIGNALING_1_UP_Up	1	1	1	1.43068	1.25457	1.26403	1.42945	1.54242	1	1.99321	1.74986	2.59742	1	1.01491	1	1	1.3002	1.27111	1	1.59109	1.07517	1.07078	1	1	1	1	1.89054	1.35489	2.19252	1.12906	1.05305	1	1.12577	1	1	1	1	1	1.47652	1.15622	1	1	1	1.32792	1.14477	1.48301	1
ABE_INNER_EAR_Down	1.21649	1.25151	1.24477	1	1	1.11489	1.82439	1	1	1	1	1	1	1	1	1	1	1	1.45167	1	1	1	1.15093	1.76297	1	1.2567	1	1	1	1	1	1	1	1.16153	1	1	1.5598	1	1	1	1	1	1.27229	1	1	1	1
ABE_INNER_EAR_Up	1	1	1	1	1	1	1	1	1.7729	1.55503	2.06036	1.34983	2.07766	2.09464	2.12611	1.09087	1.14858	1.36377	1	1.91305	1.63924	2.05613	1	1	1.20166	1	1.5457	1	1.32267	1	2.20323	1	1	1	1.11722	1	1	1	1	1.58414	1.75011	1.85146	1	1.85447	1.3812	1	1.02098
ABE_VEGFA_TARGETS_2HR_Down	1	1	1.46985	1	1	1	1	1	1	1	1	1	1	1	1	1	1	1	1	1	1	1	1	1	1	1	1	1	1.97049	1	1	1	1	1	1	1	1	1	1	1	1	1	1.4706	1	1	1	1
ABE_VEGFA_TARGETS_2HR_Up	1	1.30066	1	1	1	1	1	1	1	1	1	1.91861	1	1	1	1	1	1	1	1	1	1	1	1	1	1	1	1	1	1	1	1	1	1	1	1	1	1	1	1	1	1	1	1	1.01257	1	1
ABE_VEGFA_TARGETS_30MIN_Down	1	1	1	1	1	1	1	1	1	1	1	1	1	1	1	1.0705	1	1	1	1	1	1	1	1	1	1	1	1	1.12842	1.23084	1.10049	1.70912	1	1.42146	1.18184	1.42677	1.61755	1	1	1	1.40915	1	1	1	1	1	1
ABE_VEGFA_TARGETS_30MIN_Up	1	1	1	1	1	1	1	1	1	1.49605	1.35788	1.17896	1	1	1	1	1	1	1	1.32556	1.14184	1	1	1	1	1	1.93493	1.58861	1	1	1	1	1.67146	1	1	1	1	1	1	1	1	1	1	1	1.09711	1	1
ABRAHAM_ALPC_VS_MULTIPLE_MYELOMA_UP_Down	1	1	1.1169	1	1	1	1	1	1.0538	1	1.08281	1	1.01547	1	1	1	1.3722	1	1.19432	1	1	1	1	1.40585	1	1	1	1	1	1	1	1.46851	1.23375	1	1.82424	1.07425	1	1	1	1	1.21019	1	1.09305	1	1	1	2.04456
ABRAHAM_ALPC_VS_MULTIPLE_MYELOMA_UP_Up	1	1	1	1	1.29562	1	1.78711	1.07942	1	1.0573	1	1	1	1.05372	1	1.60165	1	1.6167	1	1.58442	1.62447	1.49988	1	1	1.18222	1.05835	1	1	1	1	1.38118	1	1	1.43138	1	1	1	1	1	1.12782	1	1	1	1.66023	1.42276	1.00644	1
ABRAMSON_INTERACT_WITH_AIRE_Down	1	1	1	1.69812	2.18733	1	1	1.17084	1.27597	2.11595	1.68757	1.89236	1	1	1	1	1	1	1	1	1	1	1	1	1	1	1.76581	1	1	1	1	1	1	1	1	1	1	2.13465	1.87134	1	1.64301	1.24939	1	1.45831	1.19996	1	1.39188
ABRAMSON_INTERACT_WITH_AIRE_Up	1	1	1	1	1	1	1	1	1	1	1	1	1	1	1	1	1	1	1	1	1	1	1.14516	1	1.46355	1	1	1	1	1	1	1.02618	1.00135	1	1.25622	1	1	1	1	1	1	1	1	1	1	1	1
ACEVEDO_FGFR1_TARGETS_IN_PROSTATE_CANCER_MODEL_DN_Down	1.04916	1	1.41674	1	1	1	1	1.1289	1.13405	1	1.32682	1	1.53775	1	1.18243	1	1	1	1.16005	1	1	1	1.48799	1.60092	1.3922	1.33941	1.21754	1.43683	1	1.35375	1	1.20127	1.26947	1.18882	1.99149	1	1	1	1	1	1.41467	1	1.43548	1	1	1	1.50371
ACEVEDO_FGFR1_TARGETS_IN_PROSTATE_CANCER_MODEL_DN_Up	1	1	1	1.4073	1.37724	1.1481	1.76365	1	1	1.58639	1	1.28314	1	1.13161	1	1.42003	1.29869	1.70393	1	1.68055	1.62414	1.35386	1	1	1	1	1	1	1.25204	1	1.61026	1	1	1	1	1.04765	1.19586	1.42072	1.64737	1.67069	1	1.11281	1	1.63558	1.54599	1.49399	1
ACEVEDO_FGFR1_TARGETS_IN_PROSTATE_CANCER_MODEL_UP_Down	1	1	1	1	1	1.21301	1	1	1.49907	1	1.14619	1	1.1223	1	1.12174	1	1	1	1.55128	1	1	1	1.12621	1.17165	1	1.17357	1	1	1	1.43839	1	1	1	1	1.47919	1.12925	1	1	1	1	1.86072	1.21941	1	1	1	1	1
ACEVEDO_FGFR1_TARGETS_IN_PROSTATE_CANCER_MODEL_UP_Up	1.21745	1.42502	1	1.41688	1.48568	1	1.81213	1.14279	1	1.15051	1	1.12151	1	1.00347	1	1.1118	1.66914	2.07653	1	1.87171	1.56001	1.23867	1	1	1.51461	1	1.44361	1	1.0625	1	1.14124	1.08913	1.22096	1.15212	1	1	1.52258	1.87097	1	1.1363	1	1	1	1.58881	1.37675	1.59736	1.40857
ACEVEDO_LIVER_CANCER_DN_Down	1.5095	1.21167	1.68142	1	1	1.00798	1	1	1	1	1	1	1	1	1	1	1.16866	1	1.26651	1	1	1	1.0046	1.18755	1	1	1	1	1	1	1	1	1	1	1.20791	1	1	1	1	1.10992	1	1	1.68946	1	1	1	1.21864
ACEVEDO_LIVER_CANCER_DN_Up	1	1	1	1.03447	1.01931	1	1.38524	1.61389	1	1.78078	1.02962	1.34124	1.35619	1.36258	1.31895	1.52465	1	1.2884	1	1.40065	1.13624	1.33428	1	1	1.13892	1	1.41403	1	1	1	1.51757	1	1.11104	1	1	1	1	1	1.12639	1	1	1	1	1.42504	1.2165	1.03685	1
ACEVEDO_LIVER_CANCER_UP_Down	1.28033	1.23159	1	1.24258	1	1	1	1	1.10821	1	1.57425	1	1	1	1	1	1	1	1	1	1	1	1	1	1	1	1.00739	1	1	1	1	1	1	1	1	1	1	1	1	1	1	1	1	1	1	1	1
ACEVEDO_LIVER_CANCER_UP_Up	1	1	1	1	1	1	1	1.01002	1	1	1	1.02199	1.32445	1.16413	1.3263	1	1	1	1	1.15442	1.01113	1.28841	1	1	1.25606	1	1	1	1.18768	1	1.1124	1	1	1	1	1	1	1	1	1	1	1	1	1.03187	1	1	1
ACEVEDO_LIVER_CANCER_WITH_H3K27ME3_DN_Down	1	1.18062	1	1	1	1	1	1.59056	1	1.6867	1.22251	1.33117	1.62071	1.53814	1.58082	1	1.07831	1	1	1	1	1.60991	1.21668	1.59309	1.0485	1.26753	1	1.53452	1.57808	1.55624	1	1	1	1.19897	1	1	1.36937	1	1	1	1.95863	1.57029	1	1	1	1	1
ACEVEDO_LIVER_CANCER_WITH_H3K27ME3_DN_Up	1	1	1	1	1.12859	1.14083	1	1	1	1	1	1	1	1	1	1.11327	1	1.06374	1	1.39689	1.34896	1	1	1	1	1	1.1873	1	1	1	1.59174	1	1	1	1.4011	1.10032	1	1.10855	1	1	1	1	1	1.17018	1.33249	1.1259	1
ACEVEDO_LIVER_CANCER_WITH_H3K27ME3_UP_Down	1	1	1	1	1	1	1	1.64508	1.21205	1.24078	1.24324	1.3025	2.07405	1.39837	1.77736	1.29637	1	1	1.35753	1	1	1.40931	1	1	1.41735	1.33342	1.29375	1	1	1.33998	1	1	1	1	1	1.30441	1	1	1	1	1.8364	1.53043	1	1	1	1	1.56559
ACEVEDO_LIVER_CANCER_WITH_H3K27ME3_UP_Up	1.12987	1.07643	1.3445	1.88179	1.65168	1.08827	1.25025	1	1	1	1	1	1	1	1	1	1.21711	1.05401	1	1.55636	1.04629	1	1	1.55488	1	1	1	1	1	1	1.19679	1.45832	1	1.13369	1.26481	1	1.31514	1.74149	1.64478	1	1	1	1.31048	1.43954	1.57763	1.57608	1
ACEVEDO_LIVER_CANCER_WITH_H3K9ME3_DN_Down	1	1	1	1	1	1.32809	1	1.22859	1	1.46027	1.3284	1.02225	1.16892	1.31194	1.25603	1	1	1	1.08855	1	1	1	1	1	1	1	1.25327	1	1	1	1.02943	1	1	1	1	1	1	1	1	1	1	1	1	1	1	1	1
ACEVEDO_LIVER_CANCER_WITH_H3K9ME3_DN_Up	1	1	1.27859	1.15962	1.33777	1	1.33651	1	1	1	1	1	1	1	1	1.3904	1	1.47656	1	1.32104	1.13207	1	1	1	1	1	1	1	1.7827	1.35338	1	1.15535	1	1	1	1	1.24006	1	1	1	1	1	1.29783	1	1	1.3258	1.04012
ACEVEDO_LIVER_CANCER_WITH_H3K9ME3_UP_Down	1	1	1	1	1	1.1267	1	1.54799	1	1.14713	1	1.02091	1.44876	1	1.12956	1.26529	1	1.05691	1.43862	1	1.10833	1	1	1	1	1	1	1	1	1.69412	1	1.19223	1.0909	1	1	1	1	1	1	1	1.85277	1.02106	1	1	1	1	1.31359
ACEVEDO_LIVER_CANCER_WITH_H3K9ME3_UP_Up	1	1	1	1.9727	1.43695	1	1.13603	1	1	1	1	1	1	1	1	1	1.14005	1	1	1.10626	1	1	1.06584	1.17801	1	1.38178	1	1.02682	1	1	1.10838	1	1	1	1	1.51799	1.05597	1.86271	1.06823	1.67881	1	1	1	1.00261	1.30403	1.64275	1
ACEVEDO_LIVER_TUMOR_VS_NORMAL_ADJACENT_TISSUE_DN_Down	1.04753	1	1.26021	1	1	1.47759	1	1	1	1	1	1	1	1	1	1	1.0714	1	1.41466	1	1.1146	1	1.19975	1.02282	1	1	1	1.13531	1.16426	1	1	1	1	1	1.16137	1	1.07558	1	1	1	1.05157	1.12431	1.2707	1	1	1	1.03582
ACEVEDO_LIVER_TUMOR_VS_NORMAL_ADJACENT_TISSUE_DN_Up	1	1	1	1	1.28777	1	1.43712	1.03218	1	1.55902	1	1.30471	1	1	1	1.25171	1	1.09965	1	1.18574	1	1	1	1	1.04821	1	1.18011	1	1	1	1.2855	1	1	1	1	1	1	1.33604	1.04755	1	1	1	1	1.462	1.50511	1.37102	1
ACEVEDO_LIVER_TUMOR_VS_NORMAL_ADJACENT_TISSUE_UP_Down	1.04896	1	1.10855	1.07478	1	1	1	1	1	1	1.40146	1	1	1	1	1	1	1	1	1	1	1	1	1	1	1	1	1	1	1	1	1	1	1	1	1	1	1.17227	1	1	1	1	1.1177	1	1	1	1
ACEVEDO_LIVER_TUMOR_VS_NORMAL_ADJACENT_TISSUE_UP_Up	1	1	1	1	1	1	1	1.57262	1.11226	1	1	1.06092	1.92053	1.52476	1.90426	1	1	1	1	1	1	1.66754	1	1	1.41266	1	1	1	1	1	1	1	1	1	1	1	1	1	1	1	1.2117	1.20999	1	1	1	1	1
ACEVEDO_METHYLATED_IN_LIVER_CANCER_DN_Down	1	1	1	1	1	1	1	1.75368	1.01217	1.18592	1	1.48417	1.83537	1.36559	1.75117	1.40536	1	1	1.0055	1	1	1.33818	1.02348	1.06494	1.23805	1.18352	1	1.47525	1.44265	1.39427	1.11094	1.10392	1	1.13698	1	1	1	1	1	1	1.56725	1.24708	1	1	1	1	1.47847
ACEVEDO_METHYLATED_IN_LIVER_CANCER_DN_Up	1.11825	1	1.28202	1.42877	1.30902	1.17031	1.18371	1	1	1	1	1	1	1	1	1	1.43575	1.25474	1	1.03096	1	1	1	1	1	1	1	1	1	1	1	1	1.12296	1	1.07394	1.28406	1.05508	1.13596	1	1.14562	1	1	1.27389	1.11848	1.31637	1.54902	1
ACEVEDO_NORMAL_TISSUE_ADJACENT_TO_LIVER_TUMOR_DN_Down	1.23425	1	1.42782	1	1	1	1	1	1	1	1	1	1	1	1	1	1.10515	1	1.15177	1	1	1	1	1	1	1	1	1	1	1	1	1	1	1	1.03487	1	1	1.03701	1	1	1	1	1.4179	1	1	1	1
ACEVEDO_NORMAL_TISSUE_ADJACENT_TO_LIVER_TUMOR_DN_Up	1	1	1	1	1	1	1	2.048	1.52492	1.99768	1.31825	1.66107	1.77013	1.62946	1.73392	1	1	1	1	1.01247	1	1.42614	1	1	1.09368	1	1.16845	1	1	1	1.09899	1	1	1	1	1	1	1	1.1671	1	1.43902	1.14118	1	1.10473	1	1	1
ACEVEDO_NORMAL_TISSUE_ADJACENT_TO_LIVER_TUMOR_UP_Down	1.18864	1.28444	1	1	1	1	1	1.37854	1.27197	1.1347	1.25706	1	1	1	1	1.09712	1	1	1.04088	1	1	1	1	1	1	1	1.18309	1	1	1	1	1	1.21256	1	1	1	1	1	1	1	1	1	1	1	1	1	1
ACEVEDO_NORMAL_TISSUE_ADJACENT_TO_LIVER_TUMOR_UP_Up	1	1	1	1	1.00428	1	1.08747	1	1	1	1	1	1	1	1	1	1	1	1	1.13743	1	1	1.07639	1	1	1	1	1	1.24053	1	1	1	1	1.25748	1	1	1	1	1	1	1	1	1	1	1	1	1
ACOSTA_PROLIFERATION_INDEPENDENT_MYC_TARGETS_DN_Down	1.20417	1	1.67777	1	1	1.31783	1	1	1.10643	1	1	1	1	1	1	1	1.17592	1	1.45913	1	1.02731	1	1.20171	1	1	1.15653	1	1	1	1	1	1.03269	1	1.20012	1	1	1.83116	1	1	1.02334	1	1.06639	1.6718	1	1	1.06026	1
ACOSTA_PROLIFERATION_INDEPENDENT_MYC_TARGETS_DN_Up	1	1.10354	1	1.34141	1.41288	1	1.83287	1.60422	1	1.82257	1	1.79868	1.4229	1.57561	1.5969	1	1	1	1	1.45285	1	1.37844	1	1.25207	1.07499	1	1.08655	2.24221	2.13533	1	1.67072	1	1	1	1	1	1	1.31787	1.65766	1	1	1	1	1.71067	1.16543	1	1.72002
ACOSTA_PROLIFERATION_INDEPENDENT_MYC_TARGETS_UP_Down	1	1	1	1	1	1	1	1	1	1	1	1	1	1	1	1	1	1	1.54316	1	1.41066	1	1	1	1	1	1	1	1	1	1	1	1	1	1.01091	1.12354	1	1.49066	1.06865	1	1	1	1	1	1	1	1.02694
ACOSTA_PROLIFERATION_INDEPENDENT_MYC_TARGETS_UP_Up	1	1	1	1.00653	1	1	1	1.39769	1.32262	1.13031	1	1	1	1	1	1	1	1	1	1.06313	1	1	1	1	1.45983	1.38286	1	1.08623	1.03966	1	1.15313	1	1.24215	1.292	1	1	1.41805	1	1	1	1.31552	1.21625	1	1	1	1	1
ADDYA_ERYTHROID_DIFFERENTIATION_BY_HEMIN_Down	1.32012	1.23127	1.29961	1	1	1	1	1	1.19895	1	1.04624	1	1	1	1	1	1	1.10633	1	1	1	1	1	1	1	1	1	1	1	1.24628	1	1.24969	1	1	1.35071	1	1	1	1	1	1	1	1.27929	1	1	1	1
ADDYA_ERYTHROID_DIFFERENTIATION_BY_HEMIN_Up	1	1	1	1.21037	1.34214	1	1.63072	1.3321	1	1.34317	1	1.65477	1	1	1	1	1	1	1	1.21559	1.0296	1.02016	1	1.49601	1.5535	1	1	1	1	1	1	1	1	1.25426	1	1	1	1.13838	1.24285	1.35232	1	1.01008	1	1.26139	1.01481	1	1
AFFAR_YY1_TARGETS_DN_Down	1	1	1	1.87225	1	1.64359	1	1	1	1.7344	1	1.92629	1	1	1	1	1	1	1.308	1	1	1	1	1	1	1.09317	1	1	1	1	1	1	1	1.09016	1.37087	1.06777	1	2.24766	1	1	1	1	1	1	1	1	1.24538
AFFAR_YY1_TARGETS_DN_Up	1.26459	1.10096	1.28243	1	1	1	1	1.08483	1.0192	1	1.37538	1	1.125	1.08297	1	1	1.46943	1.63858	1	1.56921	1.42761	1.25696	1	1	2.03109	1	1.41673	1.189	1.48962	1.12925	1.52874	1.12844	1.67717	1	1	1	1	1	1.06587	1.06489	1	1.05945	1.29681	1.27284	1.27062	1.12069	1
AFFAR_YY1_TARGETS_UP_Down	1.26031	1.11615	1.40045	1	1	1.13366	1	1	1	1	1.32241	1	1	1	1	1	1.16945	1	1.04359	1	1	1	1.33005	1.27498	1.42775	1.05024	1	1.03388	1	1.22654	1	1.39785	1	1.36016	1.38379	1.36444	1	1	1	1	1.49404	1	1.41611	1	1	1	1.19878
AFFAR_YY1_TARGETS_UP_Up	1	1	1	1.70751	1.46359	1	1.48106	1.11012	1	1.00671	1	1	1	1.64664	1.34394	1.24371	1	1	1	1.55418	1.4742	1.41254	1	1	1	1	1.29998	1	1	1	1.38907	1	1.58509	1	1	1	1.09534	1.84059	1.25257	1.48881	1	1.14962	1	1.43967	1.16606	1	1
AGUIRRE_PANCREATIC_CANCER_COPY_NUMBER_DN_Down	1	1	1	1.16259	1	1	1	1	1	1	1	1	1	1	1	1	1	1	1	1	1	1	1	1	1	1	1	1	1	1.05122	1	1	1	1	1	1	1	1	1	1	1	1	1	1	1	1	1
AGUIRRE_PANCREATIC_CANCER_COPY_NUMBER_DN_Up	1	1	1	1	1	1	1	1	1.16305	1	1	1	1.26682	1	1	1	1	1	1	1	1	1	1	1	1	1	1	1	1	1	1	1	1	1	1	1	1	1	1.07408	1	1	1	1	1	1	1	1
AGUIRRE_PANCREATIC_CANCER_COPY_NUMBER_UP_Down	1	1	1.21385	1.07155	1	1.03405	1	1	1	1	1	1	1	1	1	1	1.14154	1.12034	1.20957	1	1.12375	1	1	1.05245	1	1	1.29477	1.04741	1	1	1	1	1	1	1	1	1	1.01093	1	1.16942	1	1	1.23296	1	1	1.14261	1
AGUIRRE_PANCREATIC_CANCER_COPY_NUMBER_UP_Up	1	1	1	1	1	1	1	1	1	1	1	1	1.71674	1.13984	1.50459	1	1	1	1	1	1	1.15114	1	1	1.08949	1	1	1	1	1	1	1	1	1	1	1	1	1	1	1	1.39787	1	1	1	1	1	1
AIGNER_ZEB1_TARGETS_Down	1	1	1	1	1	1	1	1	1	1	1	1	1.82366	1	1.00436	1	1.03074	1	1	1	1	1	1	1	1	1	1	1	1	1	1	1	1	1	1	1	1	1	1	1	1.03331	1	1	1	1	1	1
AIGNER_ZEB1_TARGETS_Up	1	1	1	1	1	1	1.87382	1	1	1.11176	1.17717	1	1	1.0464	1	1.40784	1	1.79347	1	1.73078	1.50134	1.46456	1	1	1	1.23952	1.49509	1.85266	1.79379	1	1	1	1	1	1	1	1	1	1	1	1	1	1	1	1	1	1
AIYAR_COBRA1_TARGETS_DN_Down	1	1	1	1.31813	1	1	1	1	1	1.03857	1	1.20612	1	1	1	1	1	1	1	1	1	1	1	1	1	1	1	1.06599	1	1	1.2844	1.01891	1	1	1.05597	1	1	1	1	1	1	1	1	1	1	1	1
AIYAR_COBRA1_TARGETS_DN_Up	1	1	1	1	1	1	1.09541	1	1	1	1	1	1.14041	1.01028	1.21807	1	1	1	1	1	1	1	1	1	1	1	1	1	1	1	1	1	1	1	1	1	1	1	1	1	1	1	1	1	1	1	1
AIYAR_COBRA1_TARGETS_UP_Down	1	1	1.10081	1	1	1	1	1	1	1	1.41033	1	1	1	1	1	1	1	1.19772	1	1	1	1	1.25756	1	1	1	1	1	1	1	1.35927	1.23475	1	1.06076	1	1	1	1	1	1.10217	1	1.07572	1	1	1	1
AIYAR_COBRA1_TARGETS_UP_Up	1	1	1	1.64101	1	1.22747	1.11182	1.14435	1	1.20135	1	1.20543	1	1	1	1.34429	1	1.41404	1	1.7088	1.27471	1.43421	1	1	1	1	1.07569	1.24164	1.63879	1	1.27899	1	1	1	1	1	1.1894	1	1.53421	1.04854	1	1	1	1.53822	1.07907	1	1.34272
AKL_HTLV1_INFECTION_DN_Down	1	1.04608	1	1	1	1	1	1.31265	1.63642	1.23593	1.24283	1	1.27511	1.00902	1.22282	1	1	1	1.11629	1	1	1	1	1	1	1	1.14039	1	1	1	1	1	1.16294	1	1	1	1	1	1	1	1.33072	1	1	1	1	1	1
AKL_HTLV1_INFECTION_DN_Up	1	1	1	1	1.45367	1	1.12384	1	1	1	1	1	1	1	1	1.27671	1.18389	1.54796	1	1.66761	1.46956	1	1	1	1	1	1	1.24181	1.47008	1	1.02256	1	1	1	1	1	1.49084	1.30069	1	1	1	1	1	1.02673	1.14402	1.15252	1.05222
AKL_HTLV1_INFECTION_UP_Down	1.49731	1.06589	1.44742	1.17194	1.73791	1	1	1	1	1	1	1.30635	1	1	1	1	1	1	1.39801	1	1	1	1.28357	1	1	1	1	1	1	1	1	1	1	1	1	1	1	1	1	1	1	1	1.45217	1	1	1	1.43458
AKL_HTLV1_INFECTION_UP_Up	1	1	1	1	1	1	1.09486	1	1	1	1	1	1.19302	1.06458	1.19594	1	1	1	1	1.38903	1	1.01226	1	1	1.10134	1	1.1077	1	1	1	1	1	1	1	1	1	1	1.40477	1.16167	1.4176	1	1.40708	1	1.42708	1.28425	1	1
ALCALA_APOPTOSIS_Down	1.0923	1	1.45032	1	1	1	1	1	1	1	1	1	1	1	1	1	1	1	1	1	1	1	1	1	1	1	1	1	1	1	1	1	1	1	1.36722	1	1	1	1	1	1	1	1.40815	1	1	1	1
ALCALA_APOPTOSIS_Up	1	1	1	1	1	1	1	1.45053	1.07591	1.34178	1	1	1.93061	1.48872	1.87923	1	1	1	1	1.00474	1	1.79582	1	1.06167	1.12823	1	1	1.04505	1	1.32698	1	1	1	1	1	1	1	1	1	1	1.34241	1.01744	1	1	1	1	1
ALCALAY_AML_BY_NPM1_LOCALIZATION_DN_Down	1	1	1	1.7914	1	1.30657	1	1	1	1.10179	1.47794	1.25638	1	1	1	1.04786	1	1	1	1	1	1	1	1.21444	1	1	1	1	1	1	1	1.37486	1	1.21092	1.60144	1.44575	1	1.71959	1.41263	1	1	1	1	1	1	1	1.49585
ALCALAY_AML_BY_NPM1_LOCALIZATION_DN_Up	1.09456	1.13449	1	1	1	1	1.3563	1.54252	1	1	1	1	1.55352	1.0788	1.26006	1	1.3186	1.10558	1	1.0842	1	1.28322	1	1	1.60735	1	1.25309	1	1	1.05293	1.08807	1	1.22995	1	1	1	1	1	1	1.0069	1	1.00327	1	1.47505	1.19327	1.19662	1
ALCALAY_AML_BY_NPM1_LOCALIZATION_UP_Down	1	1	1	1.00418	1	1.20802	1	1	1.29829	1	1.24836	1.34818	1	1	1	1	1.4242	1	1.52394	1	1	1	1.31557	1	1.35448	1.47139	1.56525	1.75215	1	1.18528	1	1	1	1.51724	1	1	1	1	1	1	1.25638	1	1	1	1	1	1.17527
ALCALAY_AML_BY_NPM1_LOCALIZATION_UP_Up	1.04377	1	1	1	1.16458	1	1.78243	1	1	1	1	1	1	1.63191	1.32931	1.38353	1	1.66705	1	1.61969	1.11819	1.7735	1	1	1	1	1	1	1.06318	1	1.13364	1	1.12509	1	1.09683	1.15773	1	1.22115	2.02693	1.34698	1	1	1	1.36475	1	1	1
ALFANO_MYC_TARGETS_Down	1	1	1	1	1	1.41015	1	1	1.09907	1	1	1.0608	1	1	1	1	1	1	1	1	1	1	1	1	1	1	1	1	1	1.01928	1	1	1	1	1.1857	1	1	1.14367	1	1	1.12475	1	1.00091	1	1	1	1.51712
ALFANO_MYC_TARGETS_Up	1	1.21988	1	1	1	1	1.67288	1.3723	1	1.20715	1	1	1	1	1	1.04756	1	1	1	1.27617	1.20395	1	1	1	1.12282	1	1	1	1	1	1.27849	1	1	1	1	1.32373	1	1	1.24967	1.21504	1	1	1	1.63897	1.3364	1	1
ALONSO_METASTASIS_EMT_UP_Down	1	1	1.03883	1	1	1	1	1	1	1	1	1	1	1	1	1	1	1	1.20354	1	1	1	1	1	1	1.23267	1	1	1	1	1	1	1	1	1	1	1	1	1	1	1.552	1	1.04432	1	1	1.07079	1
ALONSO_METASTASIS_EMT_UP_Up	1	1	1	1	1	1.02431	1.58455	1.43	1	1.00571	1	1	1	1.16702	1	1.05802	1	1.26688	1	1.38227	1.04026	1.15229	1	1	1.23328	1	1	1	1.18932	1	1.14125	1	1.01355	1	1	1	1	1	1	1.18597	1	1	1	1.42836	1	1	1
ALONSO_METASTASIS_UP_Down	1.1419	1	1.25082	1.04943	1.04237	1	1	1	1	1	1.0861	1	1	1	1	1	1	1	1.00542	1	1	1	1	1	1	1	1	1	1	1	1	1	1	1	1.12804	1.18006	1	1	1	1	1	1	1.25011	1	1	1	1
ALONSO_METASTASIS_UP_Up	1	1	1	1	1	1.00988	1.49722	1.89693	1.09806	1.66049	1	1.95323	1.77083	1.84088	1.79785	1.08512	1	1	1	1.39807	1	1.69838	1	1	1	1	1.00887	1	1.1768	1.34015	1.21725	1	1	1	1	1	1	1	1	1.14047	1	1.22287	1	1.26176	1	1	1
ALTEMEIER_RESPONSE_TO_LPS_WITH_MECHANICAL_VENTILATION_Down	1.26603	1.07091	1.49548	1	1	1	1	1	1.20967	1	1	1	1	1.13026	1	1	1	1	1.407	1	1.067	1	1.01694	1	1.37693	1.01545	1	1.35498	1.10181	1	1	1.10741	1	1.48888	1.48218	1	1	1	1	1.4209	1.74829	1.74602	1.49604	1	1	1	1
ALTEMEIER_RESPONSE_TO_LPS_WITH_MECHANICAL_VENTILATION_Up	1	1	1	1.83704	1.79913	1.0902	1.55265	1.74248	1	1.1966	1	1.38795	1.12798	1	1	1.5855	1.08781	1.86906	1	1.41728	1	1.15961	1	1	1	1	1	1	1	1.28233	1	1	1.18355	1	1	1	1.31622	2.31176	1.63364	1	1	1	1	1.6686	1.38008	1.4456	1.40412
AMBROSINI_FLAVOPIRIDOL_TREATMENT_TP53_Down	1	1	1	1	1	1.44541	1	1	1	1	1	1	1.43973	1.11294	1.29222	1	1	1	1.33304	1	1	1	1.01743	1	1	1	1	1	1	1.38076	1	1	1	1	1.08488	1	1	1	1	1.05548	1	1.08166	1	1	1	1	1
AMBROSINI_FLAVOPIRIDOL_TREATMENT_TP53_Up	1.2689	1.24385	1	1.15145	1	1	1.15095	1	1	1.04445	1	1	1	1	1	1	1	1	1	1.54448	1.19558	1	1	1	1.28925	1	1.61574	1	1.05431	1	1	1	1	1	1	1	1	1.24211	1.24696	1	1	1	1	1.39855	1.15297	1	1.28533
AMIT_EGF_RESPONSE_120_HELA_Down	1.47986	1.09682	1.72341	1	1	1.07144	1	1	1	1	1.02788	1	1	1	1	1	1.15804	1	1	1	1	1	1.19976	1	1	1	1	1	1	1.02518	1	1.39115	1	1.23622	1.02269	1.31785	1	1	1	1	1	1	1.71218	1	1	1	1
AMIT_EGF_RESPONSE_120_HELA_Up	1	1	1	1.25721	1.15217	1	1.52995	1.31741	1	1.5401	1	1.55967	1	1	1	1.08512	1	1.09065	1.28178	1	1.30559	1.23057	1	1	1.45513	1	1	1	1	1	1	1	1	1	1	1	1	1.53043	1.28426	1	1	1	1	1.5407	1.15772	1	1.43149
AMIT_EGF_RESPONSE_120_MCF10A_Down	1.06378	1	1.63336	1	1	1	1	1	1	1	1	1	1	1.00336	1	1	1	1	1	1	1	1	1.28933	1	1	1	1	1	1	1	1	1	1	1	1.13844	1.41182	1.07606	1	1	1	1	1	1.61277	1	1	1	1
AMIT_EGF_RESPONSE_120_MCF10A_Up	1	1.04419	1	1.0617	1	1	1	1.92843	1.33692	1.81778	1.02671	1.32123	1.61857	1	1.17852	1	1	1	1.05691	1	1	1.15445	1	1	1.63486	1.04581	1.08935	1	1	1.2852	1	1	1	1.47568	1	1	1	1.56682	1	1	1	1	1	1.33597	1.24761	1.12164	1.81128
AMIT_EGF_RESPONSE_240_HELA_Down	1	1	1.07335	1.3254	1	1.3875	1	1	1.44601	1	1	1	1.3547	1	1	1.01233	1	1	1.03874	1	1	1	1	1	1	1	1	1	1	1.29595	1	1	1.04165	1	1.1006	1	1	1	1	1	1.50064	1	1.06861	1	1	1	1
AMIT_EGF_RESPONSE_240_HELA_Up	1	1.0169	1	1	1	1	1.77909	1	1	1	1	1	1	1	1	1	1	1.05369	1	1.57667	1.32102	1	1	1	1.28886	1	1	1	1	1	1	1	1	1	1	1.28869	1.56342	1.65373	1	1.22848	1	1	1	1.50636	1.03661	1	1.49595
AMIT_EGF_RESPONSE_40_HELA_Down	1.42258	1	1.87467	1	1	1.35282	1	1	2.12403	1	1	1	1	1.29995	1.00908	1	1.23896	1.11157	1	1	1	1.13551	1	1	1	1	1	1	1.65381	1	1	1.19159	1	1.14135	1.13917	1.4975	1	1	1	1.28637	1.51776	1.58041	1.87471	1	1	1	1
AMIT_EGF_RESPONSE_40_HELA_Up	1	1	1	1.69847	1.44578	1	1	1.58442	1	1.10887	1.02462	1.03819	1	1	1	1.03695	1	1	1.02486	1.29399	1.48044	1	1	1.3544	1.4085	1.29415	1.62799	1.54551	1	1	1	1	1	1	1	1	1	1.58902	1.71175	1	1	1	1	1.34004	1.32125	1	1
AMIT_EGF_RESPONSE_480_HELA_Down	1.10894	1	1.60457	1.08372	1	1.46523	1	1	1	1	1	1	1	1	1	1	1	1	1.2622	1	1	1	1	1	1	1	1	1	1.12448	1.22403	1	1	1.22883	1	1.33009	1	1	1	1	1	1	1	1.59631	1	1	1	1
AMIT_EGF_RESPONSE_480_HELA_Up	1	1.22601	1	1	1.04309	1	1.63879	1.63572	1.0288	1.70576	1	1.36144	1.12774	1	1	1.12535	1	1.11204	1	1.69293	1.42159	1.21429	1	1	1.6518	1	1	1	1	1	1.30851	1	1	1.13201	1	1.17494	1	1.28245	1.22416	1	1	1	1	1.77683	1.10778	1	1.06983
AMIT_EGF_RESPONSE_480_MCF10A_Down	1	1	1.32293	1	1	1	1	1	1	1	1	1	1	1	1	1	1	1	1	1	1	1	1	1.42802	1	1	1	1	1.41295	1.13631	1.09534	1.30812	1.86049	1	1	1	1	1	1	1	1	1	1.35093	1	1	1	1
AMIT_EGF_RESPONSE_480_MCF10A_Up	1	1	1	1.05377	1.0725	1	1	1.48932	1	1	1	1	1	1	1	1.00228	1	1	1	1.57259	1.62268	1.45263	1.31421	1	1	1	1	1	1	1	1	1	1	1.42407	1	1.37214	1.23962	1.43721	2.00382	1.06089	1.1305	1.36179	1	1.22197	1	1	1
AMIT_EGF_RESPONSE_60_HELA_Down	1.24446	1.09094	1.41153	1	1	1.54319	1	1	1.7751	1	1.25164	1	1.31895	1.38359	1.44599	1	1.01135	1	1	1	1	1	1	1.19929	1	1.1339	1	1	1	1.16921	1	1.38479	1	1	1.57559	1	1	1	1	1	1.44886	1.16785	1.37794	1	1	1	1
AMIT_EGF_RESPONSE_60_HELA_Up	1	1	1	1	1	1	1.61354	1.2192	1	1	1	1	1	1	1	1.14041	1	1.02445	1.17885	1.40855	1.55749	1	1	1	1.32392	1	1	1	1.08622	1	1	1	1	1	1	1	1.00833	1	1.00787	1	1	1	1	1.60171	1.15214	1	1.36575
AMIT_EGF_RESPONSE_60_MCF10A_Down	1.28458	1	1.7691	1	1	1.7386	1	1	1.11168	1	1	1	1	1.60934	1.23311	1.35053	1	1	1	1	1	1.00966	1.20952	1	1	1	1	1	1.6188	1	1.12722	1.0276	1	1	1.58215	1.92831	1.80023	1	1	1	1.45432	1.13435	1.78098	1	1	1	1
AMIT_EGF_RESPONSE_60_MCF10A_Up	1	1	1	1.76447	1.64791	1	1.52341	1.39288	1	1.68152	1	1	1	1	1	1	1.2048	1	1.436	1.41788	1.60613	1	1	1	1.35495	1.04344	1.34379	1.26705	1	1	1	1	1.13984	1.54476	1	1	1	2.1314	1.53243	1	1	1	1	1.84947	1.42634	1	1.04796
AMIT_SERUM_RESPONSE_120_MCF10A_Down	1.09897	1	1.64848	1	1	1.82653	1	1	1	1	1	1	1.06665	1.23027	1.23973	1	1	1	1	1	1	1	1	1	1	1	1	1	1	1.11968	1	1	1	1	1.36178	1	1	1	1	1	1.76406	1.14711	1.65925	1	1	1	1
AMIT_SERUM_RESPONSE_120_MCF10A_Up	1	1.2794	1	1	1.18768	1	1.37321	1.6452	1.03603	1.65043	1	1.54558	1	1	1	1	1.27488	1.32509	1	1.45081	1.27671	1.10971	1.02938	1	1	1	1.02406	1	1	1	1.25399	1	1	1.1022	1	1	1	1.09193	1.50532	1.35132	1	1	1	1.76597	1.40818	1	1.27233
AMIT_SERUM_RESPONSE_240_MCF10A_Down	1.25241	1	1.51701	1	1	1	1	1	1.10713	1	1.01177	1.30243	1.36599	1	1.06943	1	1	1	1.38728	1	1	1	1	1.06147	1	1	1	1	1	1.05481	1	1	1	1.25821	1.03516	1	1	1	1	1	1.37976	1	1.50613	1	1	1	1
AMIT_SERUM_RESPONSE_240_MCF10A_Up	1	1	1	1.71163	1.53517	1.41214	1.72382	1.93653	1	1.02871	1	1	1	1.00793	1	1.5152	1	1.64294	1	1.89946	1.4834	1.21984	1	1	1.29413	1.00785	1	1	1	1	1.07602	1	1	1	1	1	1.35022	1.85337	1.43428	1.19416	1	1	1	1.79905	1.08606	1	1.37912
AMIT_SERUM_RESPONSE_40_MCF10A_Down	1.08506	1	1.27685	1	1	1.42507	1	1	1.57311	1	1.07332	1	1	1	1	1	1.4681	1	1.06188	1	1	1	1	1	1	1	1	1	1	1.04261	1	1	1	1	1.68374	1	1	1	1	1	1.35174	1.19482	1.28617	1	1	1.53863	1.65739
AMIT_SERUM_RESPONSE_40_MCF10A_Up	1	1	1	1.66324	1.50434	1	1.5368	1.80941	1	1.25372	1	1.23321	1	1	1	1.51414	1	1.32301	1	1.50107	1.14089	1	1	1	1.66104	1.10615	1.31569	1.56652	1	1	1	1	1	1	1	1	1.39824	1.47198	1.46288	1	1	1	1	1.42754	1	1	1
AMIT_SERUM_RESPONSE_480_MCF10A_Down	1	1	1.06624	1	1	1	1	1	1.26124	1.09041	1.14073	1.45452	1	1	1	1	1	1	1	1	1	1	1	1.17451	1	1	1.78918	1	1	1	1	1	1	1	1	1	1	1	1.22635	1	1	1	1.08276	1	1	1	1.25635
AMIT_SERUM_RESPONSE_480_MCF10A_Up	1	1	1	1	1	1	1.18573	1	1	1	1	1	1.07386	1	1	1	1	1	1	1	1	1	1	1	1.03031	1	1	1	1	1.36603	1	1.11351	1	1	1	1	1.17597	1	1	1.47509	1	1.24849	1	1.48583	1	1.00947	1
AMIT_SERUM_RESPONSE_60_MCF10A_Down	1.17905	1	1.48094	1	1	1.44432	1	1	1.42407	1	1.44453	1.29872	1.68914	1.67522	1.76102	1	1	1	1	1	1	1.43841	1	1.20666	1	1	1	1	1.30086	1.53054	1	1.31104	1	1	1.49517	1.39444	1	1	1	1	2.0037	1.29117	1.47943	1	1	1	1.59833
AMIT_SERUM_RESPONSE_60_MCF10A_Up	1	1	1	1.2233	1.38036	1	1.57091	1	1	1.13671	1	1	1	1	1	1.16406	1.05591	1.23124	1.29146	1.30505	1.56574	1	1.01799	1	1.21926	1.015	1.2512	1	1	1	1	1	1	1.4206	1	1	1.00566	1.97853	1.67692	1.2201	1	1	1	1.73797	1.26622	1	1
AMUNDSON_GAMMA_RADIATION_RESPONSE_Down	1	1	1	2.32809	2.49105	2.12594	1	1	1	2.20267	2.02569	1.89489	1	2.19288	1	1	1	1	1.04001	1	1.05781	1	1	1	1	1.22621	1.17527	1	1	1	1	1	1	1	1	1	1	1.80968	1.08059	1	1	1	1	1	1	1	1
AMUNDSON_GAMMA_RADIATION_RESPONSE_Up	1.34303	1.08462	1.36113	1	1	1	1	1.95234	1	1	1	1	1.85777	1	1	1	1.0689	1.51673	1	1	1	1	1	1	2.51515	1	1	1.51886	1.83207	1	1	1	1.36905	1	1	1	1	1	1	1	1.11842	1	1.3537	1.10455	1	1.26057	1
AMUNDSON_GENOTOXIC_SIGNATURE_Down	1	1	1.06016	1.25707	1	1.60129	2.19353	1	1	1	1	1	1	1.05154	1	1	1.27624	1	1	1	1	1	1	1	1	1	1	1	1	1	1	1.24212	1	1	1.37884	1.35444	1	1	1	1.02299	1	1	1.05669	1	1	1	1.29363
AMUNDSON_GENOTOXIC_SIGNATURE_Up	1	1	1	1	1	1	1	1.15304	1.37828	1.21381	2.04768	1	1.01708	1	1	1.46396	1	1.21814	1	1.02797	1.0346	1	1.31748	1.14546	1.54249	1	1.27249	1.36927	1	1	1	1	1.05453	1.35468	1	1	1	1.06251	1.34641	1	1	1	1	1.04698	1	1.01488	1
AMUNDSON_POOR_SURVIVAL_AFTER_GAMMA_RADIATION_2G_Down	1	1	1	1	1	1.34505	1	1.06652	1.32363	1.18154	1.1869	1.20772	1.01261	1	1	1	1	1	1	1	1	1	1.2829	1	1	1.13812	1	1	1	1.21166	1	1	1	1	1	1	1	1	1.10608	1.03926	1	1.17125	1	1	1	1	1.10824
AMUNDSON_POOR_SURVIVAL_AFTER_GAMMA_RADIATION_2G_Up	1	1	1	1	1	1	1.40291	1	1	1	1	1	1	1	1	1.11531	1	1	1	1.42329	1.31871	1.00119	1	1	1	1	1	1	1	1	1.40182	1	1	1	1	1.21624	1	1.16491	1	1	1	1	1	1.45214	1	1	1
AMUNDSON_POOR_SURVIVAL_AFTER_GAMMA_RADIATION_8G_Down	1.09386	1	1.31201	1.27712	1	1.44083	1	1	1	1	1.00487	1	1.14522	1	1	1	1.05789	1	1.09154	1	1	1	1.14314	1	1	1.65351	1.10328	1.37278	1.34695	1.39988	1	1	1	1.07192	1	1	1	1	1	1	1.32388	1.46365	1.31769	1	1	1	1.21111
AMUNDSON_POOR_SURVIVAL_AFTER_GAMMA_RADIATION_8G_Up	1	1	1	1	1	1	1.45843	1	1	1	1	1	1	1	1	1.15769	1	1	1	1.37274	1	1	1	1	1	1	1	1	1	1	1.16411	1	1.11074	1	1	1.14063	1	1.21268	1	1	1	1	1	1.53959	1.01124	1.10007	1
AMUNDSON_RESPONSE_TO_ARSENITE_Down	1.35392	1.14704	1.27878	1	1	1	1	1	1.07592	1	1.17599	1	1	1.03363	1.0845	1	1	1	1	1	1	1	1	1	1	1	1	1	1.10919	1.04416	1	1	1	1.2242	1	1.02345	1	1.0835	1	1.16668	1.26366	1.43654	1.29771	1	1	1	1
AMUNDSON_RESPONSE_TO_ARSENITE_Up	1	1	1	1.00673	1	1	1.00894	1	1	1	1	1.26478	1	1	1	1	1	1	1	1	1	1	1	1	1	1	1	1	1	1	1	1	1	1	1.00085	1	1	1	1.25223	1	1	1	1	1.31967	1.0649	1.0389	1.18285
ANASTASSIOU_MULTICANCER_INVASIVENESS_SIGNATURE_Down	1	1	1	1	1	1.23702	1	1	2.54816	1	1.8121	1.95303	2.4069	1	1.11548	1	1	1	1.21811	1	1	1	1.07984	1.5276	1	1.95629	1	1	1	1.60469	1	1	1.14668	1	2.2308	1.38003	1	1	1	1	1	1	1	1	1	1.6638	1.93091
ANASTASSIOU_MULTICANCER_INVASIVENESS_SIGNATURE_Up	1.12396	1.07856	1.09771	1.10564	1.49142	1	2.31756	1.67432	1	1.25953	1	1	1	1.4121	1	1.9028	1.38147	2.20251	1	2.21115	2.29737	2.20012	1	1	1.91716	1	1.14439	1	2.3908	1	2.24687	1.142	1	1.4049	1	1	1.13675	1	1	2.28605	1.109	2.04286	1.0747	2.45711	2.12754	1	1
ANDERSEN_CHOLANGIOCARCINOMA_CLASS1_Down	1	1	1	1	1	1	1	1	1	1	1	1	1.20343	1	1	1.3433	1	1	1.38143	1	1	1	1.36112	1	1	1	1	1	1	1	1	1.32444	1	1	1.31971	1	1	1	1	1	1.09346	1	1	1.11981	1.19404	1	1
ANDERSEN_CHOLANGIOCARCINOMA_CLASS1_Up	1	1	1	2.22327	1.54996	1	1.35823	1	1.39809	1.41392	1.36801	1.51422	1	1.33931	1	1	1.45938	1.02747	1	1.59228	1.12242	1	1	1	1.00263	1.42996	1.13745	1	1	1	1	1	1	1	1	1	1	1	1	1.19627	1	1	1	1	1	1.22407	1
ANDERSEN_CHOLANGIOCARCINOMA_CLASS2_Down	1	1	1	1.2599	1	1.6962	1	1.44692	1.22107	1.69184	1.50394	1.60659	1	1	1	1	1	1	2.04097	1	1.97363	1	1.28629	1.59028	1	1.34636	1	1.02959	1	1.30265	1	1	1	1.51032	1.1805	1	1	1	1	1.16784	1.48901	1.2322	1	1	1	1	1
ANDERSEN_CHOLANGIOCARCINOMA_CLASS2_Up	1.85677	1.95647	1.44294	1	1.71842	1	1.93685	1	1	1	1	1	1	1.16472	1	1.02491	1.23255	1.29446	1	1.29578	1	1.06711	1	1	1.82362	1	1.33438	1	1.26885	1	1.14325	1.48424	1.84215	1	1	1.19836	1.66986	1.56305	1.05964	1	1	1	1.43213	1.82374	1.68914	1.80451	1
ANDERSEN_LIVER_CANCER_KRT19_DN_Down	1	1	1.28869	1	1	1.38585	1	1	1	1	1	1	1	1	1	1	1.05502	1	1.01348	1	1	1	1.11608	1.71577	1	1.00635	1	1	1	1	1	1.29653	1	1.44895	1.91804	1	1.1006	1.48555	1	1.50358	1	1	1.30108	1	1	1	1.23248
ANDERSEN_LIVER_CANCER_KRT19_DN_Up	1	1	1	1	1.27766	1	1.47275	1	1	2.08387	1.13549	1.55715	1	1.60734	1.28144	1.62985	1	1.66778	1	1.70444	1.568	1.6596	1	1	1	1	1.66762	1	1.15541	1	1.50453	1	1.16006	1	1	1	1	1	1.48186	1	1.30029	1.15382	1	1.06943	1.17077	1	1
ANDERSEN_LIVER_CANCER_KRT19_UP_Down	1.15107	1	1.35993	1	1	1	1	1	1	1	1.326	1	1	1	1	1	1	1	1	1	1	1	1	1	1	1	1.23501	1	1	1.37334	1	1	1.13613	1	1	1.10569	1.19644	1.09353	1	1	1	1	1.35868	1	1	1	1
ANDERSEN_LIVER_CANCER_KRT19_UP_Up	1	1	1	1	1	1.97133	1.20832	1.30625	1.38948	1	1	1	2.05054	1.93696	2.04565	1	1.29232	1.11161	1	1	1	1.85808	1	1	1.02402	1	1	1.23247	1.07206	1	1	1	1	1	1.57661	1	1	1	1	1	1.73715	1.23562	1	1	1	1	1
APPEL_IMATINIB_RESPONSE_Down	1.59629	1	1.61352	1.01603	1	1	1	1	1.32709	1	1	1	1	1	1	1	1	1	1.27578	1	1	1	1	1.50352	1	1.30133	1	1	1	1	1	1	1	1	1.08062	1	1	1	1	1.21574	1.14187	1	1.61217	1	1	1	1
APPEL_IMATINIB_RESPONSE_Up	1	1	1	1	1.41062	1	1.69922	1.96898	1	1.94709	1.26768	1.8366	1	1.77438	1.20079	1.10287	1	1	1	1.53949	1.40305	1.19666	1	1	1	1	1.18048	1	1	1	1.57777	1	1.40546	1	1	1	1.05405	1.84002	1.24858	1	1	1	1	1.52767	1	1	1.02778
APPIERTO_RESPONSE_TO_FENRETINIDE_DN_Down	1	1	1	1	1	1	1	1	1	1	1	1.14689	1	1	1	1	1	1	1	1	1	1	1	1.26671	1	1	1	1	1	1	1	1	1	1	1	1	1	1.49563	1	1	1	1	1	1	1	1	1
APPIERTO_RESPONSE_TO_FENRETINIDE_DN_Up	1	1	1	1	1	1.21701	1.25601	1.39391	1.09969	1.34515	1	1	1.68763	1.6354	1.61128	1.03301	1	1.14484	1	1.49419	1.02893	1.60284	1	1	1	1	1	1	1.20626	1.01956	1.02922	1	1	1.37735	1	1	1	1	1.1985	1	1	1.00218	1	1.4274	1.25165	1	1.29928
APPIERTO_RESPONSE_TO_FENRETINIDE_UP_Down	1.18512	1	1.32713	1	1	1.33413	1	1.22724	1.47758	1	1	1	1	1	1	1	1	1	1	1	1	1	1	1	1	1	1	1	1	1	1	1.01348	1.38161	1.37545	1.12608	1	1.19519	1	1.38028	1.11345	1.60233	1.56409	1.30128	1	1	1	1
APPIERTO_RESPONSE_TO_FENRETINIDE_UP_Up	1	1	1	1	1.10842	1	1.20779	1	1	1.16146	1	1.28859	1	1	1	1.08451	1	1.25091	1	1.53887	1.50636	1.21589	1	1.12676	1.10284	1.04257	1.19761	1.08929	1	1	1.01157	1	1	1	1	1	1	1.24061	1	1	1	1	1	1.18748	1	1	1.07718
APRELIKOVA_BRCA1_TARGETS_Down	1	1	1	1	1.2212	1	1	1	1	1	1.14574	1	1	1	1	1	1.15142	1	1	1	1	1	1.15963	1	1	1.43978	1.00681	1.05946	1	1.10093	1	1.27725	1	1.17428	1.55848	1	1	1	1.00765	1	1	1	1	1	1	1.0298	1
APRELIKOVA_BRCA1_TARGETS_Up	1	1	1	1	1	1	1.62713	1	1	1.09194	1	1.66797	1.09704	1.68339	1.44477	1.16186	1	1	1.31004	1.43289	1.54313	1.65054	1	1	1.25621	1	1	1	1	1	1	1	1	1	1	1	1	1.09461	1	1.07957	1	1.38776	1	1.29032	1.02649	1	1
ASGHARZADEH_NEUROBLASTOMA_POOR_SURVIVAL_DN_Down	1	1.26942	1	1	1.33572	1	1.25662	1.96639	1	1.98741	1.12927	1.84207	1.57537	1.90192	1.73763	1.46623	1	1	1	1	1	1.78929	1.59046	1	1	1	1.05227	1.39983	1.08071	1.60234	1.43522	1.372	1.49373	1.06347	1	1	1	1	1	1	1.39943	1.33837	1	1.29693	1	1	1.05993
ASGHARZADEH_NEUROBLASTOMA_POOR_SURVIVAL_DN_Up	1	1	1.28819	1	1	1	1	1	1	1	1	1	1	1	1	1	1.19686	1	1.6231	1	1	1	1	1	1	1	1	1	1	1	1	1	1	1	1	1.07824	1	1	1	1	1	1	1.25706	1	1	1	1
ASTIER_INTEGRIN_SIGNALING_Down	1.33737	1	1.2535	1	1	1	1	1	1	1	1	1	1	1	1	1	1.05843	1	1.17698	1	1	1	1	1.18196	1	1	1	1.04373	1.12556	1.14779	1	1	1	1	1	1	1.28371	1	1	1	1.4285	1.08995	1.22783	1	1	1	1
ASTIER_INTEGRIN_SIGNALING_Up	1	1	1	1	1.10151	1	1	1	1	1	1	1	1	1	1	1	1	1	1	1	1	1	1	1	1	1	1	1	1	1	1	1	1	1	1	1	1	1	1	1	1	1	1	1	1	1	1
ASTON_MAJOR_DEPRESSIVE_DISORDER_DN_Down	1	1	1	1.25559	1	1.18452	1	1.54958	1	1	1	1	2.03843	1.31464	1.87955	1	1.61162	1	1.8334	1.66623	2.13852	2.35984	1.09573	1	1	1	1	1.13862	1.47405	1.50909	1	1	1	1.9725	1	1	1	1	1	1	1.63162	1	1	1	1.34319	1	1.18559
ASTON_MAJOR_DEPRESSIVE_DISORDER_DN_Up	1	1	1	1	1	1	1.23739	1	1	1.00223	1	1	1	1	1	1.34987	1	1	1	1	1	1	1	1	1	1	1.16439	1	1	1	1.24061	1.78481	2.2255	1	1.71107	1.99193	1	1.06548	1.25198	1.3506	1	1.0562	1	1	1	1.07304	1
ASTON_MAJOR_DEPRESSIVE_DISORDER_UP_Down	1	1	1	1	1	1	1	1.62719	1	1.19411	1.23956	1.19044	1	1.2303	1.13119	1.11994	1	1	1	1	1	1	1	1	1	1	1	1	1	1.72469	1.43132	1	1	1	1	1	1	1	1	1	1.33117	1	1	1	1	1	1.574
ASTON_MAJOR_DEPRESSIVE_DISORDER_UP_Up	1.06838	1	1.01598	1.54835	1	1.69467	1.52123	1	1	1	1	1	1	1	1	1	1.23308	1	1	1.35653	1.22837	1.06123	1	1	1	1	1	1	1	1	1	1	1	1	1	1	1.02385	1	1	1.89792	1	1.08982	1.0358	1.66677	1.32363	1.02876	1
AUNG_GASTRIC_CANCER_Down	1	1	1	1.13001	1	1.24075	1	1	1	1.14534	1.2126	1	1	1	1	1	1.25532	1	1.27332	1	1.352	1	1	1	1	1	1.43505	1	1	1.11105	1	1.09581	1	1	1	1	1	1	1	1.07725	1	1.07594	1	1	1	1	1
AUNG_GASTRIC_CANCER_Up	1	1	1	1	1	1	1	1	1	1	1	1	1.36119	1	1	1	1	1	1	1	1	1	1	1	1.58763	1	1	1	1	1	1	1	1.36316	1	1	1	1	1	1.14226	1	1	1	1	1.24616	1.15949	1	1
AZARE_NEOPLASTIC_TRANSFORMATION_BY_STAT3_UP_Down	1.13629	1	1.20879	1	1	1	1	1	1.66072	1.27024	1.56877	1.62547	1.78464	1	1.45652	1	1	1	1.0459	1	1	1	1	1	1	1.44784	1.11915	1	1	1.08404	1	1.35911	1.01427	1.03866	1.0009	1.51814	1	1	1	1	1.78829	1.1021	1.19325	1	1	1	1.35284
AZARE_NEOPLASTIC_TRANSFORMATION_BY_STAT3_UP_Up	1	1	1	1	1.19005	1.39466	1.6909	1	1	1	1	1	1	1	1	1	1.41958	1.4476	1	1.64919	1.53239	1.27408	1.15701	1	1	1	1	1	1.37061	1	1.52301	1	1	1	1	1	1.19245	2.14702	1.51948	1.57515	1	1	1	1.61058	1.19309	1	1
AZARE_STAT3_TARGETS_Down	1	1	1	1	1	1	1	1	1	1	1	1	1	1	1	1	1	1	1	1	1	1	1.02219	1	1	1	1	1	1	1	1	1	1	1	1	1	1	1	1	1	1	1	1	1	1	1	1
AZARE_STAT3_TARGETS_Up	1	1	1	1	1.36242	1	1	1	1	1	1	1	1	1	1	1	1	1	1	1	1	1	1	1	1	1	1	1	1	1	1	1	1	1	1	1	1	1	1	1	1	1	1	1	1	1	1
BACOLOD_RESISTANCE_TO_ALKYLATING_AGENTS_DN_Down	1	1	1	1.38802	1.28771	1	1	1.1969	1.281	1.55474	1.65302	1.26797	1.26525	1.36893	1.52322	1	1.49282	1	1	1	1	1.19384	1	1	1	1	1.35689	1.05074	1	1.06905	1	1	1	1	1	1	1	1	1	1	1.5498	1.17043	1	1.31465	1.35404	1.22221	1.32464
BACOLOD_RESISTANCE_TO_ALKYLATING_AGENTS_DN_Up	1	1	1	1	1	1	1.00083	1	1	1	1	1	1	1	1	1	1	1	1	1	1	1	1	1	1	1	1	1	1	1	1	1	1	1	1	1.07495	1	1	1	1	1	1	1	1	1	1	1
BACOLOD_RESISTANCE_TO_ALKYLATING_AGENTS_UP_Down	1	1	1	1	1	1	1	1	1	1	1.67736	1	1	1	1	1.17587	1	1	1	1	1	1	1	1	1.21624	1	1.40257	1.26064	1	1	1	1	1	1	1	1	1	1	1	1	1	1	1	1	1	1	1
BACOLOD_RESISTANCE_TO_ALKYLATING_AGENTS_UP_Up	1	1	1	1	1	1	1.82456	1	1	1.59879	1	1	1	1	1.15349	1	1	1	1	1	1	1.15014	1	1	1	1	1	1	1	1	1	1	1	1	1	1	1	1	1	1	1	1	1	1	1	1	1
BAE_BRCA1_TARGETS_DN_Down	1	1	1	1	1	1.1356	1	1	1.36862	1	1.19043	1	1.23043	1	1.28114	1	1	1	1.4195	1	1	1	1	1	1	1	1	1	1	1.49618	1	1	1.00448	1.46293	1	1	1	1	1	1	1.19794	1	1	1	1	1	1
BAE_BRCA1_TARGETS_DN_Up	1.5712	1.32494	1.40816	1	1	1	1.30394	1	1	1	1	1	1	1	1	1.38644	1	1.50378	1	1.36712	1	1	1.43218	1	1	1	1	1	1	1	1	1	1	1	1.45509	1.45978	1.00697	1.06626	1.35129	1.05499	1	1	1.42704	1.35447	1.25841	1	1
BAE_BRCA1_TARGETS_UP_Down	1.33402	1.11354	1.45756	1.43099	1.78219	1	1	1	1	1	1.2928	1	1	1	1	1	1.09393	1	1.40674	1	1	1	1.06665	1	1	1	1	1	1	1	1	1	1	1	1	1	1	1	1	1	1	1	1.45641	1	1	1	1.55525
BAE_BRCA1_TARGETS_UP_Up	1	1	1	1	1	1	1.62211	1.15387	1	1	1	1.04406	1.11665	1.28004	1.1468	1.18062	1	1.2777	1	1.46021	1.11111	1.2213	1	1	1.05066	1	1.03768	1	1.39081	1	1.21926	1	1	1	1	1	1.10987	1.50969	1.24555	1.05496	1	1.04266	1	1.75749	1.25418	1	1
BAELDE_DIABETIC_NEPHROPATHY_DN_Down	1	1	1	1.25679	1	1.2374	1	1	1.49603	1	1.54913	1	1.89982	1.01873	1.51316	1	1	1	1.38092	1	1	1	1	1	1	1.02724	1	1	1	1.34055	1	1	1.18491	1.02788	1	1	1	1	1	1	2.20399	1.47298	1	1	1	1	1.19318
BAELDE_DIABETIC_NEPHROPATHY_DN_Up	1	1	1	1	1	1	1.41395	1	1	1	1	1	1	1	1	1.14854	1	1.27354	1	1.66682	1.3864	1	1	1	1	1	1	1	1	1	1.22621	1	1	1	1	1	1.19106	1	1.02269	1.23891	1	1	1	1.64247	1.19937	1.03332	1
BAELDE_DIABETIC_NEPHROPATHY_UP_Down	1.37163	1	1.78121	1	1	1	1	1	1.1441	1	1	1.44333	1	1	1	1	1	1	1	1	1	1	1.37383	1.36741	1	1.00701	1	1	1.21074	1.24575	1	1.01121	1	1.01654	1.49286	1.44673	1.25843	1	1	1.85322	1.2771	1.71456	1.761	1	1	1	1.02083
BAELDE_DIABETIC_NEPHROPATHY_UP_Up	1	1	1	1.7387	1.49656	1	1.69321	1.5216	1	1.44367	1	1	1.20291	1.61406	1.41647	1.12003	1.03943	1.49398	1	1.73063	1.76174	1.69575	1	1	1	1	1.71198	1	1	1	1.68266	1	1	1	1	1	1	1.23586	1	1	1	1	1	1.82777	1.73179	1.34639	1
BAKKER_FOXO3_TARGETS_DN_Down	1	1	1	1.24692	1	1.32468	1	1	1	1	1.23725	1	1	1	1	1	1	1	1	1	1	1	1	1	1	1	1.0226	1	1	1	1	1.2519	1.0402	1	1.2231	1.05775	1	1	1	1	1	1	1	1	1	1.56423	1.09797
BAKKER_FOXO3_TARGETS_DN_Up	1	1	1	1	1	1	1	1	1.06162	1.07491	1	1	1.65401	1	1.34663	1.06197	1	1	1	1	1	1.24607	1	1	1	1	1	1	1	1	1	1	1	1	1	1	1	1	1	1	1.32865	1.48147	1	1	1	1	1
BAKKER_FOXO3_TARGETS_UP_Down	1.47037	1.61087	1.03838	1.42329	1.38471	1	1	1	1	1	1.31403	1	1.81097	1.15183	1.3683	1	1.15831	1	1.12569	1	1	1.09025	1	1	1	1	1	1.06397	1	1.01491	1	1	1.03668	1	1	1	1	1	1	1	1.14421	1	1.03627	1	1	1	1.21218
BAKKER_FOXO3_TARGETS_UP_Up	1	1	1	1	1	1	1	1	1	1	1	1	1	1	1	1.54389	1	1.48718	1	1.08331	1	1	1	1	1	1	1	1	1	1	1.0348	1	1	1	1.20353	1	1	1.39401	1	1	1	1	1	1	1	1	1
BALDWIN_PRKCI_TARGETS_UP_Down	1.15352	1.28344	1	1.43758	1.02915	1.14551	1	1	1	1	1.05401	1	1.26063	1	1.22944	1	1	1	1	1	1	1	1	1	1	1	1	1	1	1	1	1.49017	1	1	1.32271	1	1	1.06788	1	1	1	1	1	1	1	1	1.56412
BALDWIN_PRKCI_TARGETS_UP_Up	1	1	1	1	1	1	1.18513	1	1	1	1	1	1	1	1	1	1.22754	1.49788	1	1.31449	1.26348	1	1	1.45003	1.18381	1	1.32402	1.47137	1.28763	1	1	1	1	1	1	1	1.15411	1	1	1.03317	1	1	1	1.033	1	1.05951	1
BANDRES_RESPONSE_TO_CARMUSTIN_MGMT_24HR_DN_Down	1	1	1	1	1	1	1	1	1	1	1	1	1	1	1	1.21105	1	1.42567	1	1	1	1	1	1	1	1	1	1.36589	1	1	1	1.01418	1	1	1	1	1	1	1	1	1	1	1	1.41853	1	1	1
BANDRES_RESPONSE_TO_CARMUSTIN_MGMT_24HR_DN_Up	1	1	1	1	1	1	1.14304	1	1	1	1	1.31653	1.20979	1.3179	1.27464	1	1	1	1	1	1	1.27166	1	1	1	1	1	1	1.04372	1	1	1	1	1.01989	1	1	1.32703	1	1	1	1	1.09001	1	1	1	1.09433	1
BANDRES_RESPONSE_TO_CARMUSTIN_MGMT_48HR_DN_Down	1	1	1.36149	1	1	1.21754	1	1	1	1	1	1	1	1	1	1.20856	1	1.20538	1	1	1	1	1	1.44913	1.10387	1	1	1	1	1.061	1	1.37779	1	1	1.57206	1.1232	1.48642	1	1	1	1	1	1.36062	1	1	1.19323	1.15389
BANDRES_RESPONSE_TO_CARMUSTIN_MGMT_48HR_DN_Up	1	1.26791	1	1	1	1	1.48444	1	1.04593	1.40745	1.0093	1.32993	1.43738	1.86141	1.54205	1	1.14569	1	1.15861	1.46355	1.56934	1.41116	1	1	1	1	1	2.22429	2.18509	1	1.35618	1	1	1	1	1	1	1	1	1.00721	1	1.75322	1	1	1	1	1
BANDRES_RESPONSE_TO_CARMUSTIN_WITHOUT_MGMT_48HR_DN_Down	1	1	1.07335	1.2148	1	1.35053	1	1	1	1	1	1	1	1	1	1	1.07643	1.19827	1	1	1	1	1.20809	1	1	1.35541	1	1	1	1	1	1.44788	1	1	1.50951	1.40636	1	1	1	1	1	1	1.08716	1	1	1.39412	1.50966
BANDRES_RESPONSE_TO_CARMUSTIN_WITHOUT_MGMT_48HR_DN_Up	1	1.01569	1	1	1	1	1.30412	1	1	1	1	1	1.19065	1.41671	1.53839	1	1	1	1	1.31131	1.31691	1.4353	1	1	1	1	1	1	1	1	1	1	1	1	1	1	1	1	1	1	1.43949	1.13437	1	1.08235	1	1	1
BARIS_THYROID_CANCER_DN_Down	1.16773	1	1	1.07184	1	1.0784	1	1	1.20227	1	1.04554	1	1	1	1	1	1	1	1.44076	1	1	1	1	1	1	1	1	1	1	1.27054	1	1	1	1	1	1	1	1	1.13764	1	1.27783	1	1	1	1	1	1.49437
BARIS_THYROID_CANCER_DN_Up	1	1	1	1	1.38814	1	1.96311	1	1	1.05155	1	1	1.65019	1.07838	1.40449	1.00612	1.10181	1.45775	1	1.66408	1.06171	1.23063	1	1	1.45458	1	1	1.14519	1	1	1.39446	1.17429	1.09138	1.11554	1	1	1.61094	1	1	1	1	1.03556	1	1.50792	1.31249	1.19585	1
BARIS_THYROID_CANCER_UP_Down	1.30695	1.50407	1.15173	1	1.1489	1	1.43519	1	1	1	1	1	1	1	1	1.3715	1	1.14139	1	1	1	1	1	1	1	1	1	1	1	1	1	1	1	1	1	1	1	1	1	1	1	1	1.14559	1	1	1	1
BARIS_THYROID_CANCER_UP_Up	1	1	1	1	1	1	1	1	1	1	1	1.79794	1.31155	1.01105	1.09523	1	1.15957	1	1	1	1	1.12513	1	1.30575	1	1	1	1	1	1	1	1	1	1	1.40544	1	1	1	1.46573	1	1	1	1	1	1	1	1.02249
BARRIER_CANCER_RELAPSE_NORMAL_SAMPLE_DN_Down	1	1	1	1	1	1.33934	1	1	1	1	1	1	1	1	1	1	1.23592	1.61242	1	1	1	1	1	1	1	1	1	1	1	1.54081	1.72412	1.18411	1	1	1	1	1	1	1	1	1	1	1	1	1	1.16152	1
BARRIER_CANCER_RELAPSE_NORMAL_SAMPLE_DN_Up	1	1.22347	1	1	1	1	1.04949	1	1	1	1	1	1	1	1	1	1	1	1	1	1	1	1.14815	1	1.13249	1	1.36412	1.31673	1	1	1	1	1	1	1	1.39777	1.04559	1	1.37837	1	1.25297	1	1	1.38769	1.3057	1	1
BARRIER_CANCER_RELAPSE_NORMAL_SAMPLE_UP_Down	1	1	1	1	1	1	1	1	1	1	1	1	1.20861	1	1	1	1	1	1	1	1	1	1.05027	1	1	1	1	1	1	1	1	1	1	1.10302	1.30684	1	1	1	1	1	1	1	1	1	1	1	1
BARRIER_CANCER_RELAPSE_NORMAL_SAMPLE_UP_Up	1	1	1	2.0269	1.32839	1	1	1	1	1	1	1	1	1	1	1	1	1.07886	1	1.22621	1.08959	1	1	1	1	1	1	1	1.00228	1	1	1	1	1	1	1	1.72957	1	1	1	1	1	1	1	1.38008	1.04443	1
BARRIER_COLON_CANCER_RECURRENCE_UP_Down	1	1	1	1	1	1	1	1	1.10725	1	1.31205	1	1	1	1	1	1	1	1	1	1	1	1	1	1.29206	1.09075	1	1	1	1	1	1	1.09164	1	1	1	1	1	1	1	1	1	1	1	1	1	1.12242
BARRIER_COLON_CANCER_RECURRENCE_UP_Up	1	1	1	1	1	1	1.30393	1.27665	1	1	1	1.00777	1.23969	1.1856	1.16882	1	1	1.09664	1	1.08835	1.20858	1.30028	1	1	1	1	1	1	1.4372	1	1.1445	1	1	1	1	1	1	1	1	1.10658	1	1	1	1.40322	1.24773	1	1
BASAKI_YBX1_TARGETS_DN_Down	1.39251	1.39999	1.13444	1.09538	1	1.35026	1	1.23869	1.59863	1.07006	1.22178	1	1.59135	1.11551	1.5047	1	1	1	1.3486	1	1	1.33158	1	1.05233	1.08724	1	1	1	1	1.25271	1	1	1.14375	1	1.0338	1	1	1	1	1	1.92356	1.30573	1.13347	1	1	1	1.45292
BASAKI_YBX1_TARGETS_DN_Up	1	1	1	1	1	1	1.31895	1	1	1	1	1	1	1	1	1.15957	1	1.20996	1	1.33114	1.29209	1	1	1	1	1	1.04146	1	1	1	1.13728	1	1	1	1	1.02185	1.20197	1.69868	1.34011	1.05482	1	1	1	1.27	1.20816	1.24161	1
BASAKI_YBX1_TARGETS_UP_Down	1	1	1	2.04378	1	1.86093	1	1	1	1.66382	1.97474	1.76385	1	1	1	1	1	1	1.07361	1	1	1	1	1	1	1.18327	1	1	1	1	1	1.34499	1	1	1.44541	1.90047	1	1.48235	1.41731	1	1	1	1	1	1	1	1
BASAKI_YBX1_TARGETS_UP_Up	1.56755	1.79479	1	1	1	1	1.30088	1.68616	1.04591	1	1	1	1.84508	1	1.40292	1	1	1.16707	1	1.26542	1.06754	1.43509	1	1	2.37827	1	1	1.21962	1.58288	1.14135	1	1	1.31954	1.20137	1	1	1.04058	1	1	1	1	1	1	1.32992	1	1.10346	1.16278
BASSO_B_LYMPHOCYTE_NETWORK_Down	1	1	1.00713	1	1	1	1	1	1	1	1.52676	1	1	1	1	1	1	1	1	1	1	1	1	1	1	1	1	1	1	1	1	1	1	1	1.12423	1	1	1	1	1.06096	1	1	1.02406	1	1	1	1
BASSO_B_LYMPHOCYTE_NETWORK_Up	1	1	1	1	1	1	1.13795	1.83159	1	1	1	1.04246	1.91699	1.30539	1.80125	1	1	1.09039	1	1	1.04984	1.67279	1	1	1.45155	1	1	1.11682	1.22533	1	1	1	1.03743	1	1	1	1	1	1	1	1.00805	1	1	1.31273	1.07566	1	1
BASSO_CD40_SIGNALING_DN_Down	1	1	1.45557	1	1	1	1	1	1	1	1	1	1.04028	1.23869	1.0951	1.15612	1	1	1	1	1	1	1.429	1.25914	1	1	1	1.47854	1.2522	1.13816	1	1.08441	1.47892	1	1.20027	1	1	1	1.5539	1.01933	1.05769	1	1.46608	1	1	1	1.31791
BASSO_CD40_SIGNALING_DN_Up	1	1.25777	1	1	1.33751	1.09977	1.04158	1.1901	1	1.6054	1	1	1	1	1	1	1.41473	1	1	1.2506	1.27557	1.08249	1	1	1	1	1	1	1	1	1	1	1	1.04017	1	1	1	1.00239	1	1	1	1	1	1	1	1.09408	1
BASSO_CD40_SIGNALING_UP_Down	1.61335	1.1586	1.4747	1	1	1.3203	1	1	1.2785	1	1	1	1	1.16755	1	1	1	1	1.30671	1	1	1	1	1.09937	1	1.20805	1	1	1.12911	1	1	1.31241	1	1.18782	1.64316	1	1.03227	1	1	1.4662	1.43057	1.56314	1.45219	1	1	1	1
BASSO_CD40_SIGNALING_UP_Up	1	1	1	1.26004	1.40555	1	1.79168	1.78941	1	1.44883	1.00829	1.37898	1	1	1	1.31672	1.07665	1.74733	1	1.47937	1.12687	1.03545	1.15125	1	1.20665	1	1.04088	1.21594	1	1	1	1	1	1	1	1.26836	1	1.81094	1.28666	1	1	1	1	1.7797	1.47346	1.00756	1.91974
BASSO_HAIRY_CELL_LEUKEMIA_UP_Down	1.39778	1.18923	1.37679	1	1	1.47688	1	1	1.14756	1	1.29951	1	1	1	1	1	1	1	1	1	1	1	1.26052	1.13215	1	1	1	1	1	1.66689	1	1.09038	1.62391	1	1	1	1	1	1.52211	1	1.54931	1.11974	1.38504	1	1	1	1.88495
BASSO_HAIRY_CELL_LEUKEMIA_UP_Up	1	1	1	1.12799	1.12058	1	1.70491	1	1	1.4363	1	1.18006	1	1.51548	1.02472	1.05898	1.09339	1.41817	1	1.59066	1.66019	1.49906	1	1	1	1	1.00522	1	1	1	1.09762	1	1	1	1	1.13946	1.38066	1.91842	1	1.36853	1	1	1	1.58841	1.07623	1	1
BECKER_TAMOXIFEN_RESISTANCE_DN_Down	1	1	1	1	1	1	1	1	1	1.19005	1.64573	1.34039	1	1	1	1	1	1	1.28576	1	1	1	1	1	1	1.09807	1	1	1	1.57544	1	1.44413	1.3146	1	1.32225	1	1	1	1	1	1.47765	1	1	1	1	1.04072	1.72255
BECKER_TAMOXIFEN_RESISTANCE_DN_Up	1	1	1	1.06075	1.03641	1.14598	1.41599	1	1	1	1	1	1.41092	1.20401	1.30881	1.22685	1	1.30741	1	1.29094	1	1.18352	1	1.46711	1	1	1	1.07564	1.02146	1	1.33975	1	1	1	1	1.09183	1.29342	1	1	1.30951	1	1	1	1.19345	1	1	1
BECKER_TAMOXIFEN_RESISTANCE_UP_Down	1.26807	1	1.66161	1.78329	1	1.77141	1	1	1.15634	1	1	1	1	1	1	1.12906	1	1	1.2855	1	1	1	1	1.547	1.04442	1.19081	1	1.40828	1	1	1	1	1.01287	1	1.80395	1	1	1	1	1	2.01066	1.27181	1.68925	1	1	1	1
BECKER_TAMOXIFEN_RESISTANCE_UP_Up	1	1	1	1	1.41467	1	1.51628	1	1	1.57522	1	1.21578	1	1.52065	1.28498	1	1.19444	1	1	1.80565	1.20622	1.159	1	1	1	1	1	1	1.09654	1	1.20817	1	1	1	1	1	1.18162	1.28175	1.2558	1.13092	1	1	1	1.53704	1.19676	1.06432	1
BEGUM_TARGETS_OF_PAX3_FOXO1_FUSION_DN_Down	1	1	1.53955	1	1	1	1	1	1	1	1	1.11238	1.49566	1	1.21209	1	1.26196	1	1.13056	1	1	1	1	1.12362	1	1	1	1	1	1	1	1	1	1	1	1	1	1	1	1	1	1	1.54662	1	1	1	1.39411
BEGUM_TARGETS_OF_PAX3_FOXO1_FUSION_DN_Up	1.37873	2.07317	1	1.28723	1.40172	1	1.7314	1.48809	1	1.60176	1.18751	1	1	1	1	1.29541	1	1.00819	1	1.63748	1.34417	1	1	1	1.27477	1.20422	1.25602	1	1	1.01523	1.24174	1	1.15612	1	1	1	1	1	1	1.59166	1	1.46817	1	1.77172	1.56884	1	1
BEGUM_TARGETS_OF_PAX3_FOXO1_FUSION_UP_Down	1	1	1	1	1	1.01926	1	1.3067	1	1	1.18281	1	1.50575	1.16882	1.09501	1.06044	1	1	1.27879	1	1	1	1	1	1	1	1	1	1	1.48356	1	1	1.00521	1	1.11726	1	1	1	1	1	2.04172	1	1	1	1	1	1.41906
BEGUM_TARGETS_OF_PAX3_FOXO1_FUSION_UP_Up	1	1	1.45561	1	1	1	1.42781	1	1	1	1	1.16374	1	1	1	1	1.33768	1.07059	1	1.60933	1.27513	1	1	1	1	1.55057	1.13644	1	1.20403	1	1	1.13005	1	1	1	1.21763	1.36038	1.57928	1.67878	1.75007	1	1	1.46219	1.06788	1	1	1
BEIER_GLIOMA_STEM_CELL_DN_Down	1.65386	1.47881	1.48144	1.25035	1	1.45264	1	1.26034	1	1	1	1	1	1	1	1	1	1	1.0045	1	1	1	1	1	1.1051	1.19727	1	1.2676	1.55843	1.16908	1.16795	1	1	1.29355	1	1	1	1	1	1.20332	1	1	1.46867	1	1	1	1.06198
BEIER_GLIOMA_STEM_CELL_DN_Up	1	1	1	1	1	1	1	1	1	1	1.29048	1	1	1	1	1	1	1	1	1.03739	1	1	1	1	1	1	1	1	1	1	1	1	1	1	1	1	1.31294	1.35476	1.62078	1	1	1	1	1.16414	1.09469	1	1
BEIER_GLIOMA_STEM_CELL_UP_Down	1	1	1	1.57578	1	1.68664	1	1.16071	1	1.09002	1.04391	1.91507	1.50617	1	1.25259	1	1	1	1.14764	1	1	1	1.38976	1	1	1	1	1	1	1	1	1	1	1	1	1.00279	1	1	1	1	1.19776	1	1	1	1	1	1.48909
BEIER_GLIOMA_STEM_CELL_UP_Up	1.07986	1	1.10893	1	1	1	1.43639	1	1	1	1	1	1	1	1	1.49076	1.10966	1.67677	1	1.06369	1.00055	1.56617	1	1	1	1	1	1	1.13151	1.00535	1.03789	1.54043	1.10017	1.25594	1.18446	1	1.08145	1	1	1.45361	1	1	1.09491	1	1	1	1
BENPORATH_CYCLING_GENES_Down	1	1	1	2.26283	1	1.92132	1	1	1.08714	2.19193	1.99127	1.72276	1	1.59262	1.0665	1	1	1	1	1	1	1	1	1	1	1.10974	1.28377	1	1	1	1	1	1	1	1	1.15064	1	1.95567	1.27035	1	1.01921	1	1	1	1	1	1
BENPORATH_CYCLING_GENES_Up	1.00125	1	1.28922	1	1	1	1	1	1	1	1	1	1	1	1	1	1	1.09248	1	1	1	1	1.05654	1	2.22337	1	1	1.57074	1.61763	1	1	1.03416	1.26641	1	1	1	1.00172	1	1	1	1	1	1.27147	1	1	1	1
BENPORATH_EED_TARGETS_Down	1.28735	1.16296	1.24563	1	1	1.29298	1	1.33375	1	1	1.67193	1.31667	1.5535	1	1	1.57219	1	1	1	1	1	1	1.30696	1.09503	1.69615	1.30164	1.27165	1.5963	1.14873	1.46129	1	1.89313	1.54394	1.13523	1.75722	1.71405	1	1	1	1	1.85205	1.31616	1.24665	1	1	1	1.50254
BENPORATH_EED_TARGETS_Up	1	1	1	1.57969	1.43599	1	1.52045	1	1.47506	1.53416	1	1	1	1.59589	1.63861	1	1.54231	1.43409	1	1.52367	1.90484	1.8543	1	1	1	1	1	1	1	1	1.11956	1	1	1	1	1	1.4552	1.41576	1.24324	2.08504	1	1	1	1.36298	1.44299	1.24041	1
BENPORATH_ES_1_Down	1	1	1	1.94876	1	1.41077	1	1	1.23666	1.95394	1.56848	1.84099	1	1	1	1	1	1	1	1	1	1	1	1	1	1.06538	1.14024	1	1	1.26645	1	1	1	1	1.00578	1	1	2.02253	2.09633	1	1.13319	1	1	1	1.03248	1	1
BENPORATH_ES_1_Up	1.07569	1	1.40902	1	1	1	1	1.06547	1	1	1	1	1	1	1	1	1	1	1	1	1	1	1	1	1.57749	1	1	1	1.07254	1	1.12128	1	1.01989	1.09815	1	1	1	1	1	1	1	1	1.40224	1	1	1.03289	1
BENPORATH_ES_2_Down	1	1	1	1.71827	1	1.77732	1	1	1	1.07824	1	1	1	1	1	1	1.74781	1	1	1	1	1	1	1	1	1	1.32297	1	1	1	1	1	1	1	1	1	1	1.18061	1.54337	1	1.07989	1	1	1	1	1	1
BENPORATH_ES_2_Up	1.04589	1	1	1	1.42377	1	1.20691	1.44099	1	1	1	1	1	1	1	1.77781	1	1.42873	1	1	1	1	1	1	1.54807	1	1	1	1.06999	1	1	1	1	1	1	1	1	1	1	1	1	1	1	1.01595	1	1.11085	1
BENPORATH_ES_CORE_NINE_CORRELATED_Down	1	1	1	1.59819	1.15232	1.53069	1	1	1	1.90626	2.11983	1.88944	1	1.46834	1.08653	1	1	1	1	1	1	1	1	1	1	1.15703	1.14045	1	1	1.58673	1.09142	1.065	1.40095	1	1.16802	1	1	1.25151	1.18454	1	1.56164	1.36437	1	1	1	1	1.21834
BENPORATH_ES_CORE_NINE_CORRELATED_Up	1	1.07281	1	1	1	1	1.21538	1.02407	1	1	1	1	1	1	1	1.17218	1.08066	1.19153	1	1.29951	1.37507	1.07066	1	1.13859	1.91321	1	1	1.07087	1.00991	1	1	1	1	1.03657	1	1.12679	1.79442	1	1	1	1	1	1	1	1.13007	1.38914	1
BENPORATH_ES_WITH_H3K27ME3_Down	1.25996	1.13793	1.35327	1	1	1	1	1.37898	1	1	1.56146	1.27511	1.46636	1	1	1.73853	1	1	1	1	1	1	1.37309	1.38475	1.81596	1.24761	1	1.78024	1.2878	1.46499	1	1.79914	1.25155	1.48787	1.80074	1.69214	1	1	1	1	1.82861	1	1.35239	1	1	1	1.59201
BENPORATH_ES_WITH_H3K27ME3_Up	1	1	1	1.9422	1.48704	1.59144	1.50656	1	1.43935	1.63738	1	1	1	1.65859	1.6995	1	1.66024	1.34056	1	1.36385	1.74324	1.78203	1	1	1	1	1.14598	1	1	1	1.24698	1	1	1	1	1	1.37255	1.60173	1.43375	1.8834	1	1.30014	1	1.33176	1.44923	1.26644	1
BENPORATH_MYC_MAX_TARGETS_Down	1.09181	1	1.04319	1	1	1	1	1	1	1	1.16116	1	1	1	1	1	1	1	1	1	1	1	1	1	1	1	1	1	1	1	1	1	1	1	1	1.07361	1	1.17552	1	1	1	1	1.05033	1	1	1	1
BENPORATH_MYC_MAX_TARGETS_Up	1	1	1	1	1	1	1	1.43883	1	1	1	1	1.89778	1.26125	1.74015	1	1	1	1	1	1	1.35631	1	1	1.33681	1	1	1	1	1.02595	1	1	1	1.01079	1	1	1	1	1	1	1.18722	1.03334	1	1	1	1	1
BENPORATH_MYC_TARGETS_WITH_EBOX_Down	1.11356	1	1.67962	1.04647	1	1.06698	1	1	1	1	1	1	1	1	1	1	1	1.33039	1.08382	1	1	1	1	1	1	1.04744	1	1	1	1	1	1	1	1	1	1.1462	1	1.72874	1.28097	1	1	1	1.68544	1	1	1	1
BENPORATH_MYC_TARGETS_WITH_EBOX_Up	1	1	1	1	1	1	1.17489	1.42161	1	1	1	1.03515	1.60934	1.05621	1.38875	1	1	1	1	1.00993	1	1.13575	1	1	1.50388	1	1.0897	1	1	1	1	1	1.18354	1	1	1	1	1	1	1	1	1	1	1.06901	1	1	1
BENPORATH_NANOG_TARGETS_Down	1	1	1	1.50053	1	1.16107	1	1	1.13927	1.22558	1.50642	1.25189	1	1	1	1	1	1	1	1	1	1	1	1	1	1	1.01357	1	1	1.10744	1	1	1.0044	1	1	1	1	1.12034	1	1	1.01157	1	1	1	1	1	1
BENPORATH_NANOG_TARGETS_Up	1	1	1	1	1	1	1.19716	1	1	1	1	1	1.14618	1	1.01014	1.12523	1	1.0657	1	1.16925	1.01527	1	1	1	1.20741	1	1	1	1	1	1.07693	1	1	1	1	1.08189	1.12636	1	1	1	1	1	1	1.0811	1	1	1
BENPORATH_NOS_TARGETS_Down	1.3516	1.61765	1.01799	1.34571	1	1.67	1	1	1.23171	1.69252	1.56025	1.85205	1.05	1.11375	1.00692	1	1.25753	1	1.29092	1	1	1	1	1	1	1	1.14257	1	1	1.39133	1	1	1	1	1	1	1	1.63176	1	1	1.78696	1.39336	1.0285	1	1	1	1.38862
BENPORATH_NOS_TARGETS_Up	1	1	1	1	1	1	1.58145	1	1	1	1	1	1	1	1	1.49266	1	1.24102	1	1.42723	1.00454	1	1	1	1.14138	1	1	1	1	1	1.30951	1	1.07053	1	1	1.23405	1	1	1.19643	1.33531	1	1	1	1.33449	1	1	1
BENPORATH_OCT4_TARGETS_Down	1.19178	1.45414	1	1.22368	1	1.47055	1	1	1.07473	1.55395	1.56533	1.46226	1	1	1	1	1.11425	1	1.01764	1	1	1	1	1	1	1.01858	1.17354	1	1	1.46215	1	1	1	1	1	1	1	1.30718	1	1	1.50988	1.0806	1	1	1	1	1.31434
BENPORATH_OCT4_TARGETS_Up	1	1	1	1	1	1	1.40142	1	1	1	1	1	1	1	1	1.40268	1	1.27537	1	1.48141	1.41693	1.04007	1	1	1.1073	1	1	1	1	1	1.03067	1	1	1.00547	1.01718	1.08939	1	1	1.08904	1.20254	1	1	1	1.16325	1	1	1
BENPORATH_PRC2_TARGETS_Down	1.29501	1.32076	1.33785	1	1	1.19703	1	1.40977	1	1	1.9213	1.42817	1.57446	1	1	1.55995	1	1	1	1	1	1	1.45159	1.20303	1.82544	1.38739	1.35039	1.79899	1.42742	1.53697	1	1.9991	1.5532	1.34187	1.85091	1.79292	1	1	1	1	1.95617	1.45133	1.34027	1	1	1	1.64583
BENPORATH_PRC2_TARGETS_Up	1	1	1	1.71278	1.57695	1	1.49316	1	1.59542	1.61738	1	1	1	1.70414	1.96389	1	1.52004	1.5143	1	1.41665	1.72998	2.03616	1	1	1	1	1	1	1	1	1.25519	1	1	1	1	1	1.47488	1.33202	1.42592	1.86953	1	1	1	1.35461	1.4551	1.20228	1
BENPORATH_PROLIFERATION_Down	1	1	1	2.28846	2.98237	1.49024	1	1	1	1.98731	2.08962	1.52554	1	1	1	1	1	1	1	1.04544	1	1	1	1	1	1	1.04902	1	1	1	1	1	1	1	1.11942	1.458	1	1.79385	1.66152	1	1	1	1	1	1	1	1
BENPORATH_PROLIFERATION_Up	1	1	1.22656	1	1	1	1	1.3075	1.14147	1	1	1	1.93955	1	1.47101	1	1	1	1	1	1	1.22529	1.28542	1	2.1265	1	1	1.56914	1.61531	1.66854	1	1	1.53103	1	1	1	1	1	1	1	1	1	1.21617	1	1	1.30211	1
BENPORATH_SOX2_TARGETS_Down	1.14188	1.1915	1	1.3251	1	1.16662	1	1	1.01867	1.50059	1.67776	1.2691	1	1.0623	1	1	1.01581	1	1.00794	1	1	1	1	1	1	1	1.09278	1	1	1.32365	1	1	1	1	1	1	1	1.33187	1	1	1.11897	1	1	1	1	1	1
BENPORATH_SOX2_TARGETS_Up	1	1	1	1	1	1	1.01702	1	1	1	1	1	1.16112	1	1	1.07799	1	1	1	1.03424	1	1	1	1	1.06535	1	1	1	1	1	1	1	1	1	1.05764	1.24	1.20678	1	1	1.04166	1	1	1	1	1	1	1
BENPORATH_SUZ12_TARGETS_Down	1.33457	1.20353	1.48137	1	1	1.24806	1	1.33739	1	1	1.62072	1.30433	1.66869	1	1	1.64151	1	1	1	1	1	1	1.39668	1.28963	1.73992	1.3379	1	1.606	1	1.51118	1	1.86638	1.45364	1.21016	1.77849	1.61495	1	1	1	1	1.9575	1.42828	1.45917	1	1	1	1.49987
BENPORATH_SUZ12_TARGETS_Up	1	1	1	1.74657	1.52514	1	1.52469	1	1.5373	1.62168	1	1	1	1.6476	1.65074	1	1.71093	1.54643	1	1.47186	1.82488	1.85529	1	1	1	1	1.08911	1	1	1	1.15314	1	1	1	1	1	1.46278	1.66281	1.48294	1.82125	1	1	1	1.36898	1.5333	1.35364	1
BERENJENO_ROCK_SIGNALING_NOT_VIA_RHOA_DN_Down	1	1	1	1	1	1.71932	1	1.22865	2.12139	1.62696	1.83065	1.27042	1.82515	1.07682	1.49377	1	1	1	1	1	1	1	1	1	1	1.18696	1	1	1	1.69952	1	1.5138	1.56993	1.14644	1.20112	1	1	1	1	1.20941	1.71785	1.45315	1	1	1	1.26134	1.41053
BERENJENO_ROCK_SIGNALING_NOT_VIA_RHOA_DN_Up	1	1	1	1	1	1	1.68415	1	1	1	1	1	1	1	1	1.10396	1	1.19411	1.00032	1.55054	1.44766	1	1.09185	1.02773	1	1	1.10225	1	1	1	1	1	1	1	1	1	1	1.39328	1.61543	1	1	1	1	1.66446	1.04271	1	1
BERENJENO_ROCK_SIGNALING_NOT_VIA_RHOA_UP_Up	1	1	1	1	1	1	1	1	1	1	1	1	1	1	1	1	1	1	1	1	1	1	1	1	1	1	1	1	1	1	1	1	1	1	1	1	1	1	1	1	1.35151	1	1	1.41859	1.25348	1	1
BERENJENO_TRANSFORMED_BY_RHOA_DN_Down	1.58792	1.2678	1.6511	1.07913	1	1.48638	1	1	1.32672	1	1.37979	1.07189	1	1	1	1	1	1	1.19489	1	1	1	1.03072	1.37164	1	1	1	1	1	1.26406	1	1.05002	1	1.00526	1.65159	1	1	1	1	1	1	1	1.64481	1	1	1.37269	1.70046
BERENJENO_TRANSFORMED_BY_RHOA_DN_Up	1	1	1	1	1	1	1.94877	1.42885	1	1.49867	1	1	1.12863	1.84562	1.50824	1.58035	1	1.72107	1	1.84096	1.72027	1.867	1	1	1.0258	1	1.41735	1	1.35155	1	2.12128	1	1	1	1	1	1.05539	1.50827	1.58083	1.647	1	1.46292	1	2.01359	1.5781	1	1
BERENJENO_TRANSFORMED_BY_RHOA_FOREVER_DN_Down	1	1	1	1	1	1	1	1	1.39267	1	1.34848	1.06471	1.74496	1	1	1	1	1	1	1	1	1	1.30753	1	1	1	1	1	1	1	1	1.5535	1	1	1.7147	1.35157	1	1	1	1	1	1	1	1	1	1.01819	1.49158
BERENJENO_TRANSFORMED_BY_RHOA_FOREVER_DN_Up	1.76592	1.7049	1.50782	1	1.32368	1	1.67019	1	1	1.09811	1	1	1	1.00046	1	1	1.31342	1.7075	1.25545	1.74592	1.89243	1.26725	1	1	1.22115	1	1	1.4085	1.70161	1	1.75292	1	1	1	1	1	1	1	1	1.42038	1	1.00394	1.51216	2.00542	1.64705	1	1
BERENJENO_TRANSFORMED_BY_RHOA_REVERSIBLY_DN_Down	1	1	1	1	1	1	1	1	1.30049	1	1.17394	1.41623	1.47522	1.06387	1.6869	1	1	1	1	1	1	1	1	1	1	1	1	1	1	1	1	1.11216	1	1	1.73368	1	1	1	1	1	1.53037	1	1	1	1	1	1.75527
BERENJENO_TRANSFORMED_BY_RHOA_REVERSIBLY_DN_Up	1.60151	1.90788	1.21837	1	1	1	1.90673	1.66712	1	1	1	1	1	1	1	1.03971	1.40475	1.47803	1.53363	1.79356	1.92286	1	1	1	1.60297	1.17344	1	1	1.56218	1	1.20657	1	1	1	1	1	1	1	1	1.76552	1	1.30461	1.23561	1.86299	1.55112	1	1
BERENJENO_TRANSFORMED_BY_RHOA_UP_Down	1	1	1	1.81473	1	1.48082	1	1	1	1.35703	1.71866	1.40027	1	1	1	1	1	1	1	1	1	1	1	1	1	1.14978	1.0633	1	1	1	1	1	1	1	1.46534	1.45945	1	1.62417	1.92593	1	1	1	1	1	1	1	1
BERENJENO_TRANSFORMED_BY_RHOA_UP_Up	1.12889	1.22533	1	1	1	1	1.12327	1.69805	1	1	1	1	1.93414	1	1.63518	1	1	1.06804	1	1.28247	1.39621	1.59506	1	1	2.29378	1	1	1.04449	1.17439	1.42374	1	1	1.14567	1	1	1	1	1	1	1	1	1.14813	1	1.21774	1	1.16559	1
BERNARD_PPAPDC1B_TARGETS_DN_Down	1	1	1	1	1	1.03684	1	1	1	1	1	1.1912	1.86684	1.33284	1.59112	1	1	1	1.65866	1	1.18673	1.73428	1	1	1	1	1	1.14124	1.19872	1.48628	1	1.01819	1.23082	1	1.01822	1	1	1	1	1	1.25321	1	1	1	1	1	1.20496
BERNARD_PPAPDC1B_TARGETS_DN_Up	1.06937	1.22351	1	1.35149	1	1	1.01455	1	1.06313	1.08607	1.14927	1	1	1	1	1	1	1	1	1.403	1	1	1.41556	1	1	1	1	1	1	1	1	1	1	1.03838	1	1	1	1.14936	1.49876	1	1	1	1	1.22965	1.23506	1.13015	1
BERNARD_PPAPDC1B_TARGETS_UP_Down	1.09429	1.12622	1	1	1	1	1	1	1	1	1	1	1	1	1	1.30755	1	1.57228	1	1.24033	1.28974	1.11854	1	1	1.04807	1	1	1	1	1.06558	1	1	1	1.26026	1	1	1	1	1.13307	1	1	1	1	1	1	1	1
BERNARD_PPAPDC1B_TARGETS_UP_Up	1	1	1	1	1	1	1.16858	1	1.03248	1	1	1	1	1	1	1	1	1	1	1	1	1	1	1	1	1	1	1	1	1	1	1	1	1	1.39325	1.10989	1.07671	1	1	1.37295	1	1	1	1	1	1.12831	1
BERTUCCI_INVASIVE_CARCINOMA_DUCTAL_VS_LOBULAR_DN_Down	1	1	1	1	1	1	1	1	1.7964	1	1.62721	1.09289	1.72937	1	1.32471	1	1	1	1	1	1	1	1.04386	1.45011	1	1	1	1	1	1	1	1	1	1	1.35956	1.00513	1	1	1	1.2251	1.1963	1.27891	1	1	1	1	1
BERTUCCI_INVASIVE_CARCINOMA_DUCTAL_VS_LOBULAR_DN_Up	1	1	1	1.27722	1.63269	1	1.87643	1	1	1	1	1	1	1	1	1.78623	1.48809	2.22239	1.70917	2.00121	2.10899	1.7256	1	1	1.31369	1	1.30972	1	1.29499	1.00978	1.57303	1.20929	1.06889	1	1	1	1.14789	1	1	1	1	1	1	1.85236	1.72061	1.42015	1
BERTUCCI_INVASIVE_CARCINOMA_DUCTAL_VS_LOBULAR_UP_Down	1	1	1	1	1	1	1	1	1	1	1	1	1	1	1	1	1.27705	1	1	1	1	1	1	1	1	1	1	1	1	1	1	1	1	1	1	1	1	1	1	1	1	1	1	1	1	1	1
BERTUCCI_INVASIVE_CARCINOMA_DUCTAL_VS_LOBULAR_UP_Up	1	1	1	1	1	1	1	1	1	1	1	1	1	1	1	1.22478	1	1	1	1	1	1.22109	1	1	1	1	1	1	1	1	1	1	1	1	1	1	1	1	1	1	1	1	1	1	1	1	1
BERTUCCI_MEDULLARY_VS_DUCTAL_BREAST_CANCER_DN_Down	1	1	1	1	1	1.27516	1	1.1065	1.30964	1	1.67106	1.3932	2.06216	1.16178	1.81516	1	1	1	1.09559	1	1	1	1.2843	1.42186	1	1.38051	1	1.17973	1	1.51617	1	1.28323	1.04401	1	1.7576	1	1	1.35239	1.92058	1	1.33685	1	1	1	1	1	1.8434
BERTUCCI_MEDULLARY_VS_DUCTAL_BREAST_CANCER_DN_Up	1.58151	1.89464	1	1.50899	1.31948	1	1.88749	1	1	1	1	1	1	1	1	1.33782	1	1.50839	1	1.93115	1.77666	1.07437	1	1	1.26044	1	1.00893	1	1.02527	1	1.62125	1	1	1.3198	1	1.18567	1.09897	1	1	1.30679	1	1	1	1.96534	1.56023	1	1
BERTUCCI_MEDULLARY_VS_DUCTAL_BREAST_CANCER_UP_Down	1	1	1	1.50424	1	1.50315	1	1	1	1	1	1	1	1	1	1	1	1	1	1	1	1	1	1	1	1	1	1	1	1	1	1	1	1	1	1.02811	1	1	1	1.31544	1.213	1.35997	1	1	1	1	1
BERTUCCI_MEDULLARY_VS_DUCTAL_BREAST_CANCER_UP_Up	1.18734	1.30656	1	1	1	1	1.04201	1.18948	1	1.16522	1	1	1.59372	1	1.31559	1.01353	1	1.20551	1	1.06525	1.25382	1.29312	1	1.30585	1.58505	1.00172	1	1.21194	1	1	1	1	1	1	1	1	1	1	1	1	1	1	1	1	1	1.149	1.54819
BHAT_ESR1_TARGETS_NOT_VIA_AKT1_DN_Down	1.10623	1.02457	1.07226	1.02077	1	1.4627	1	1.13338	1	1	1.5163	1	1	1.87839	1.6864	1	1	1	1.44351	1	1.4223	1.82868	1	1	1	1	1	1	1.03334	1.59565	1	1.12146	1	1	1	1	1	1	1	1	2.10031	1.45179	1.04729	1	1	1	1.57152
BHAT_ESR1_TARGETS_NOT_VIA_AKT1_DN_Up	1	1	1	1	1.23083	1	1.62548	1	1	1.02428	1	1	1.27811	1	1	1	1.13089	1.32608	1	1	1	1	1.19712	1.03429	1	1.11534	1	1	1	1	1	1	1	1	1.23034	1.21265	1.57525	1.36692	1.0713	1.2583	1	1	1	1.12938	1.1187	1.03149	1
BHAT_ESR1_TARGETS_NOT_VIA_AKT1_UP_Down	1	1	1.24803	1.11117	1	1.47791	1	1	1	1	1	1	1	1	1	1	1	1	1.308	1	1	1	1.34287	1.36269	1	1.13163	1	1.23252	1.18543	1.22606	1	1.12352	1.1785	1.17272	1.05924	1	1	1.5172	1	1	1	1	1.25317	1	1	1	1.25585
BHAT_ESR1_TARGETS_NOT_VIA_AKT1_UP_Up	1	1	1	1	1	1	1.42022	1.38034	1.16654	1.39971	1.0359	1.27561	1	1.03864	1	1.02264	1.1144	1.22218	1	1.5648	1.13876	1.13347	1	1	1.17153	1	1.08966	1	1	1	1.46711	1	1	1	1	1.10821	1.16699	1	1	1	1	1	1	1.28225	1.38101	1.27424	1
BHAT_ESR1_TARGETS_VIA_AKT1_DN_Down	1.23236	1.37035	1	1	1	1.44023	1	1.08217	1.00527	1.03562	1.07609	1.34756	2.35466	2.17565	2.30139	1	1	1	1.3342	1	1.37676	2.33693	1	1.05561	1.19217	1	1	1.0452	1.29334	1.37026	1	1.38165	1.27021	1	1	1	1.43034	1	1	1	1.68516	1.30919	1.00227	1	1	1	2.05774
BHAT_ESR1_TARGETS_VIA_AKT1_DN_Up	1	1	1	1.23523	1.15826	1	1.63629	1	1	1	1	1	1	1	1	1	1	1	1	1	1	1	1.3682	1	1	1	1	1	1	1	1	1	1	1.15276	1	1	1	1	1	1.24984	1	1	1	1.31269	1.29514	1.11732	1
BHAT_ESR1_TARGETS_VIA_AKT1_UP_Down	1	1	1.2605	1	1	1.55247	1	1	1	1	1	1	1	1	1	1	1.05155	1	1.21892	1	1	1	1.22585	1.08572	1	1.11558	1	1.04789	1.49307	1.05119	1	1.1532	1	1.0198	1.29608	1.08268	1	1.34197	1.24417	1	1	1	1.24171	1	1	1	1.13533
BHAT_ESR1_TARGETS_VIA_AKT1_UP_Up	1	1.09511	1	1	1	1	1.28502	1.46384	1.27863	1.62089	1.1976	1.22295	1	1.11173	1	1.17161	1	1.07525	1	1.26173	1	1	1	1	1.18155	1	1.13107	1	1	1	1.15892	1	1	1	1	1	1	1	1	1	1	1	1	1.07998	1.15571	1	1
BHATI_G2M_ARREST_BY_2METHOXYESTRADIOL_DN_Down	1.47293	1.17648	1.55626	1	1	1.03132	1	1	1	1	1.11075	1	1	1	1	1	1.01366	1	1.13944	1	1	1	1	1	1.0032	1.20962	1.12885	1	1	1	1.26116	1	1	1	1	1	1	1.57591	1	1.04558	1	1.00021	1.53386	1	1	1	1
BHATI_G2M_ARREST_BY_2METHOXYESTRADIOL_DN_Up	1	1	1	1	1.16797	1	1.23274	1.53425	1	1.73205	1	1.40042	1.40983	1.62151	1.63838	1.30653	1	1.07088	1	1.48422	1	1.5251	1	1.16254	1	1	1	1	1	1	1	1	1	1.23367	1	1.09805	1	1	1.42442	1	1	1	1	1.33262	1.16714	1.30851	1
BHATI_G2M_ARREST_BY_2METHOXYESTRADIOL_UP_Down	1	1	1	1.44193	1	1.40101	1	1	1	1.21203	1.12809	1	1	1	1	1	1.29645	1	1.09361	1	1	1	1	1	1	1	1.19418	1	1	1	1	1.34551	1	1	1.44735	1.05993	1	1	1	1.05141	1.23832	1.31424	1	1	1	1	1
BHATI_G2M_ARREST_BY_2METHOXYESTRADIOL_UP_Up	1	1	1	1	1.00957	1	1.00083	1	1	1	1	1.17209	1	1.07153	1	1.30992	1	1	1	1.20862	1	1.11194	1.30225	1.14473	1.93693	1	1	1.16747	1	1	1.29286	1	1.18259	1	1	1	1.04905	1	1	1	1	1	1	1.11493	1	1	1.16269
BHATTACHARYA_EMBRYONIC_STEM_CELL_Down	1	1	1	1.56708	1	1.12286	1	1	1.33697	1.43125	2.09198	1.14767	1	1	1	1	1	1	1.21442	1	1	1	1	1	1	1.55424	1.55101	1	1	1.14332	1	1.3002	1	1.37183	1.02053	1.30572	1	1.45423	1.3503	1	1.06803	1	1	1	1	1	1
BHATTACHARYA_EMBRYONIC_STEM_CELL_Up	1	1	1	1	1	1	1.20276	1.56083	1	1	1	1	2.09048	1.51675	2.01342	1.09498	1	1.47524	1	1.34125	1	1.65111	1	1	1.23901	1	1	1	1.22119	1	1.56793	1	1.32391	1	1	1	1	1	1	1	1	1	1	1.26423	1	1	1
BIDUS_METASTASIS_DN_Down	1.00945	1.09095	1	1	1	1	1	1	1	1	1	1.19107	1	1	1	1	1	1	1.31725	1	1	1	1	1.35962	1	1.03208	1	1	1	1.35466	1	1	1	1.40863	1.50213	1	1	1	1	1	1	1	1	1	1	1	1
BIDUS_METASTASIS_DN_Up	1	1	1	1	1.19991	1	1.62021	1.01522	1	1.04438	1	1	1	1	1	1	1.01749	1.24909	1	1.29323	1	1	1	1	1.25161	1	1.23205	1	1	1	1.42691	1	1.00992	1	1	1	1	1.27707	1	1	1	1	1	1.46767	1.24933	1.20903	1.02916
BIDUS_METASTASIS_UP_Down	1	1	1	2.24325	2.76008	1.14455	1	1.06588	1.20588	2.47611	2.27732	1.8271	1	1.45451	1	1	1	1	1	1	1	1.16945	1	1	1	1	1.47886	1	1	1	1	1	1	1	1	1	1	2.34612	1.66646	1	1.20043	1	1	1	1	1	1
BIDUS_METASTASIS_UP_Up	1	1	1.67979	1	1	1	1	1	1	1	1	1	1	1	1	1	1	1	1	1	1	1	1.14987	1.26231	1.73955	1	1	1.03775	1.40042	1	1	1	1	1	1	1	1.32356	1	1	1	1	1	1.64832	1	1	1.13788	1
BILANGES_RAPAMYCIN_SENSITIVE_GENES_Down	1	1	1	1	1.14835	1	1	1	1	1	1	1.05341	1	1	1	1	1	1	1	1	1	1	1.05347	1.43164	1.11009	1	1	1	1	1	1.14821	1	1	1	1	1.00322	1.37109	1	1	1	1	1	1	1	1	1	1
BILANGES_RAPAMYCIN_SENSITIVE_GENES_Up	1	1	1	1	1	1	1	1	1.38538	1	1	1	1.27476	1	1.04927	1	1	1	1	1	1	1	1	1	1	1	1.07046	1	1	1	1	1	1	1	1.20299	1	1	1	1	1	1	1	1	1	1	1	1.03894
BILANGES_RAPAMYCIN_SENSITIVE_VIA_TSC1_AND_TSC2_Down	1.27988	1	1.47728	1	1	1	1	1	1	1	1	1	1	1	1	1	1	1	1	1	1	1	1	1.1514	1.11747	1.09083	1	1.15941	1	1	1	1	1	1	1	1	1	1.9028	1	1	1	1	1.47031	1	1	1	1
BILANGES_RAPAMYCIN_SENSITIVE_VIA_TSC1_AND_TSC2_Up	1	1	1	1	1	1.75498	1	2.24145	1.07035	1.13573	1	1.13471	2.24072	2.22846	2.45921	1	1	1	1	1	1	2.14425	1	1	1	1	1	1	1	1	1.15611	1	1	1	1	1	1	1	1	1	1.29786	1.07431	1	1	1	1	1
BILANGES_SERUM_AND_RAPAMYCIN_SENSITIVE_GENES_Down	2.02832	1.67306	2.09094	1	1	1	1	1	1	1	1.71912	1	1	1	1	1	1	1	1	1.5715	1.12848	1	1	1	1	1	1.56226	1	1	1	1	1	1.39012	1	1	1	1.31816	1.06205	1	1.26571	1	1	2.10199	1	1	1.60277	1
BILANGES_SERUM_AND_RAPAMYCIN_SENSITIVE_GENES_Up	1	1	1	1.52995	1	2.41206	1	1.11735	1.82189	1	1	1	2.88243	2.14142	2.77117	1	1	1	1	1	1	2.36374	1	1	1.1892	1	1	1.00468	1	1	1	1	1	1	2.05809	1.33367	1	1	1.78666	1	1.5392	1	1	1.47703	1	1	1
BILANGES_SERUM_RESPONSE_TRANSLATION_Down	1.62056	1.62327	1.75274	1	1	1	1	1	1	1	1.97007	1	1	1.11816	1	1	1	1	1	1.1966	1	1	1	1.38674	1.25481	1	1.56192	1.58678	1.09698	1.20294	1.08255	1	1.25683	1.06825	1	1	1	1.67644	1	1	1.44356	1	1.77161	1	1	1	1
BILANGES_SERUM_RESPONSE_TRANSLATION_Up	1	1	1	1	1	1.47651	1	1	1.61606	1	1	1.0768	2.08254	1	1.74117	1	1.50269	1.25066	1	1	1	1.56821	1.09033	1	1	1	1	1	1	1	1	1	1	1	1	1.60542	1	1	1.28743	1.43684	1	1	1	1.05903	1	1.04665	1
BILANGES_SERUM_SENSITIVE_GENES_Down	1.20337	1.08262	1.21517	1	1	1.03187	1	1	1	1	1.55813	1.66375	1	1	1	1	1	1	1.07699	1	1	1	1.02163	1.32306	1	1.01925	1.19858	1.12105	1	1.2492	1	1	1.37144	1	1.13236	1	1	1	1	1	1.17432	1	1.20008	1	1	1.16979	1.25995
BILANGES_SERUM_SENSITIVE_GENES_Up	1	1	1	1	1	1	1.43327	1	1.27827	1	1	1	1.94291	1.21389	1.78467	1.26563	1.19419	1.64929	1	1.01856	1	1.68686	1	1	1	1	1	1	1	1	1	1	1	1	1	1.43653	1	1	1	1.3784	1	1.04979	1	1.26231	1.09501	1	1
BILANGES_SERUM_SENSITIVE_VIA_TSC2_Down	1	1	1	1	1	1.24821	1	1.74765	1.34372	1.84009	1.23008	2.11549	1.621	1.789	1.98728	1	1	1	1	1	1	1	1	1.03054	1	1.06456	1.16948	1	1	1.76594	1	1.11951	1	1.286	1.47527	1	1	1.58177	1.69344	1	1.66649	1.07765	1	1	1	1.21734	1
BILANGES_SERUM_SENSITIVE_VIA_TSC2_Up	1.66162	1	1.95855	1	1	1	1.49253	1	1	1	1	1	1	1	1	1.25573	1	1.17397	1.32284	1.89023	2.11295	1	1	1	1.55846	1	1	1	1.05631	1	1.41077	1	1.03	1	1	1.37566	1	1	1	1.19654	1	1	1.98176	1.42456	1.22832	1	1
BILBAN_B_CLL_LPL_DN_Down	1.47943	1.50191	1.30038	1	1	1.01684	1	1.39886	2.01705	1.62787	1.58126	1	1.06923	1	1	1	1.15744	1	1	1	1	1	1.21262	1.47526	1	1.10381	1	1.15559	1	1	1	1.02316	1	1	1.18219	1	1	1	1.49191	1	1.41103	1.53654	1.31391	1	1	1	1
BILBAN_B_CLL_LPL_DN_Up	1	1	1	1.32165	1	1	1	1	1	1	1	1	1	1	1	1.38704	1	1.53166	1.11368	1.34009	1.5987	1.03824	1	1	1	1	1	1	1.10525	1	1.05731	1	1.01368	1	1	1	1.50289	1.22554	1	1	1	1	1	1.27133	1	1	1
BILBAN_B_CLL_LPL_UP_Down	1	1	1	1	1	1	1	1	1	1	1.12303	1	1.45255	1.32209	1.41374	1	1	1	1	1	1	1.42475	1	1	1	1	1	1	1.20011	1.44531	1	1	1	1.01945	1	1	1.14919	1	1	1	1.45056	1.13391	1	1	1	1	1
BILBAN_B_CLL_LPL_UP_Up	1	1	1	1	1	1	1	1	1	1	1	1	1	1	1	1	1	1	1	1	1	1	1	1	1	1	1	1	1	1	1	1.13794	1	1	1.42165	1.6438	1	1.0147	1.19351	1	1	1	1	1.07074	1	1	1
BILD_CTNNB1_ONCOGENIC_SIGNATURE_Down	1.78307	1.79258	1.17003	1.48293	1	1.3087	1	2.14515	2.12431	2.1178	1.77473	1.50904	2.04485	2.12793	2.21204	1	1.22936	1	1	1	1	2.16031	1	1	1	1.44769	1.53639	1	1	1.70215	1	1	1.6547	1	1	1	1	1	1	1	1.82137	1.26874	1.18481	1	1	1	1.72819
BILD_CTNNB1_ONCOGENIC_SIGNATURE_Up	1	1	1	1	1	1	1.57925	1	1	1	1	1	1	1	1	1.16716	1	1	1	1.03319	1	1	1	1	1	1	1	1	1	1	1	1	1	1	1.78366	1.50042	1	1	1	1.17526	1	1	1	1.54277	1.17931	1	1
BILD_E2F3_ONCOGENIC_SIGNATURE_Down	1	1	1	1.02351	1	1.05481	1	1	1	1	1	1	1.07711	1	1.08851	1.04869	1.07301	1.37614	1	1	1	1.0789	1	1	1	1	1	1	1.16938	1	1.05061	1	1.10609	1	1	1	1	1.02375	1.20917	1	1	1	1	1.13163	1	1	1.02953
BILD_E2F3_ONCOGENIC_SIGNATURE_Up	1	1	1	1	1	1	1	1	1	1	1.02054	1	1	1	1	1	1	1	1	1	1	1	1	1	1.23829	1	1	1	1	1	1	1.04128	1	1.29292	1	1.03574	1.44254	1	1	1.09521	1	1	1	1	1	1	1
BILD_HRAS_ONCOGENIC_SIGNATURE_Down	1.59422	1.13035	1.81617	1	1	1.21165	1	1.17268	1.53113	1	1.25535	1.28424	1.19075	1.26051	1.18494	1	1.43473	1	1.04973	1	1	1	1	1	1	1	1	1	1.42414	1.35672	1	1.31115	1	1.14473	1	1.10366	1	1	1	1.03477	1.5923	1.43151	1.81834	1	1	1	1.17513
BILD_HRAS_ONCOGENIC_SIGNATURE_Up	1	1	1	1	1.28369	1	1.58272	1	1	1.08425	1	1	1	1	1	1.56919	1	1.45832	1	1.49111	1.32355	1	1.19942	1	1.38615	1	1	1	1	1	1.14915	1	1.44319	1	1	1	1	1.69154	1.57584	1	1	1	1	1.64774	1.42759	1.06948	1
BILD_MYC_ONCOGENIC_SIGNATURE_Down	1	1	1.04625	1	1	1.25622	1	1	1.42336	1	1.06277	1.21817	1	1	1	1	1.05687	1	1.03946	1	1	1	1	1.25009	1	1	1	1	1	1	1	1.02054	1	1	1.08033	1	1	1.02386	1.35707	1	1	1	1.05755	1	1	1	1.36782
BILD_MYC_ONCOGENIC_SIGNATURE_Up	1	1.22051	1	1	1	1	1.4592	1	1	1	1	1	1.03381	1	1	1.30601	1	1.2347	1	1.30963	1.25356	1.09928	1	1	1.35619	1	1	1	1	1	1.20511	1	1.23573	1	1	1	1	1	1	1	1.11677	1.09261	1	1.53908	1.30101	1	1
BILD_SRC_ONCOGENIC_SIGNATURE_Down	1	1	1	1	1	1	1	1.30055	1	1	1.27115	1	1.54602	1.94705	1.82521	1	1	1	1.38476	1	1	1.67149	1.02762	1	1	1.58224	1.00933	1.08662	1	1	1	1	1.37373	1	1	1	1	1	1	1	1.48395	1	1	1	1	1	1.2855
BILD_SRC_ONCOGENIC_SIGNATURE_Up	1	1.03294	1	1	1	1	1.38622	1	1	1	1	1	1	1	1	1	1	1	1	1.20722	1	1	1	1	1	1	1	1	1	1	1	1	1	1	1.57323	1	1	1	1.19686	1.03708	1	1	1	1.02547	1.08261	1	1
BIOCARTA_ACTINY_PATHWAY_Down	1	1	1	1	1	1	1	1	1	1	1	1	1	1	1	1.66376	1	1	1	1	1	1	1	1	1	1	1	1.19273	1	1	1	1	1	1	1.12664	1	1	1	1	1	1	1	1	1	1	1	1
BIOCARTA_ACTINY_PATHWAY_Up	1	1	1	1	1	1	1	1	1	1	1	1.23104	1.23012	1	1.02154	1	1	1	1	1	1	1	1	1	1	1	1	1	1	1	1	1	1	1	1	1	1	1	1	1	1	1	1	1	1	1	1
BIOCARTA_AGR_PATHWAY_Down	1	1	1	1	1	1	1	1	1	1	1	1.41852	1.82972	1.13749	1.62466	1.09248	1	1	1	1	1	1.02343	1	1	1	1	1	1	1	1.44503	1	1	1.38401	1	1	1	1	1.11988	1.14454	1	1.03479	1	1	1	1	1	1.32935
BIOCARTA_AGR_PATHWAY_Up	1	1	1	1.19609	1	1.13405	1.09896	1.03915	1	1	1	1	1	1	1	1	1.35236	1	1.00174	1.17682	1.20183	1	1	1	1	1	1.13862	1	1	1	1.11529	1	1	1	1	1	1	1	1	1	1	1	1	1.27065	1.19562	1.041	1
BIOCARTA_AKT_PATHWAY_Down	1	1	1	1	1	1	1	1.15082	1.40853	1	1	1	1.26544	1.32701	1.35851	1	1	1	1	1	1.09876	1.41679	1	1	1	1	1	1	1	1	1	1.31838	1	1	1	1	2.04493	1	1	1	1.24737	1	1	1	1	1	1
BIOCARTA_AKT_PATHWAY_Up	1	1	1	1	1	1	1.34258	1	1	1	1	2.05679	1	1	1	1	1	1	1	1	1	1	1	1	1	1	1	2.70479	2.55432	1	1	1	1	1	1	1	1	1	1	1	1	1	1	1	1	1	1
BIOCARTA_ALK_PATHWAY_Down	1.07824	1.30373	1	1.69577	1	1.37878	1	1	1.54209	1	1.46476	1.31308	1.70454	1.56572	1.91128	1	1	1	1	1	1	1.1514	1	1	1	1.29011	1	1	1	1.20561	1	1	1	1	1	1	1	1	1	1.11922	1	1	1	1	1	1	1
BIOCARTA_ALK_PATHWAY_Up	1	1	1	1	1	1	1.76222	1	1	1	1	1	1	1	1	1	1	1.18496	1	1.72313	1.63079	1	1.41917	1	1.63079	1	1	1.25299	1.45874	1	1.41406	1.12477	1.06008	1.01979	1	1.04343	1.07806	1	1	1	1	1	1	1.76165	1.70371	1	1
BIOCARTA_AT1R_PATHWAY_Down	1	1	1	1.08218	1.12597	1	1	1	1	1	1	1	1.40404	1.41556	1.54316	1.49977	1	1.21411	1	1	1	1.35591	1	1	1	1	1	1	1	1.3681	1	1	1.31814	1	1	1	1	1	1	1	1	1.04628	1	1	1	1	1
BIOCARTA_AT1R_PATHWAY_Up	1	1	1	1	1	1	1	1	1	1.06934	1.38989	1	1	1	1	1	1.29168	1	1.63636	1	1.21233	1	1	1	1	1.21774	1.71374	1	1	1	1	1	1	1.39904	1	1	1.23074	1	1	1	1	1	1	1	1.16783	1	1
BIOCARTA_ATRBRCA_PATHWAY_Down	1	1	1	1.4378	1	1.56976	1	1	1	1.27061	1	1	1	1.08973	1	1	1	1	1	1	1	1	1	1	1	1	1	1	1	1	1	1	1	1	1	1	1	1.5232	1.07174	1	1	1	1	1	1	1	1
BIOCARTA_ATRBRCA_PATHWAY_Up	1.32943	1.07345	1.42781	1	1	1	1	1	1	1	1	1	1	1	1	1	1	1	1	1	1	1.14126	1.61604	1.17867	1.19834	1.28724	1.318	1.67232	1	1	1	1	1	1	1	1	1	1	1	1	1.38548	1.23309	1.40287	1	1	1	1
BIOCARTA_BAD_PATHWAY_Down	1.42237	1	1.26271	1	1	1	1	1.30936	1	1	1	1	1.05418	1.13037	1.16352	1	1	1	1	1	1	1	1.09287	1	1.35945	1	1	1.20279	1.40509	1.12498	1	1	1.02584	1	1	1.09597	1	1	1	1	1	1	1.2818	1	1	1	1.26262
BIOCARTA_BAD_PATHWAY_Up	1	1	1	1	1	1.66974	1	1	1	1	1	1	1	1	1	1	1	1	1	1.04261	1	1	1	1	1	1	1	1	1	1	1	1	1	1	1.19645	1	1.23935	1	1	1	1	1	1	1	1.21286	1	1
BIOCARTA_BCR_PATHWAY_Down	1.16081	1.12932	1.28043	1	1	1.27457	1	1	1	1	1	1	1.2405	1	1	1.33764	1	1.12175	1	1	1	1	1	1	1	1	1	1.10909	1.00567	1.09691	1.24887	1	1.34617	1	1	1	1	1	1	1.18276	1.36751	1.34205	1.29584	1	1	1	1
BIOCARTA_BCR_PATHWAY_Up	1	1	1	1	1	1	1.15385	1	1	1.36437	1.08246	1	1	1	1	1	1	1	1.19502	1	1.30083	1	1	1	1	1	1.22196	1	1	1	1	1	1	1.51111	1	1	1.23538	1	1	1	1	1	1	1.1339	1.16882	1	1
BIOCARTA_BIOPEPTIDES_PATHWAY_Down	1	1	1	1	1	1	1.00672	1	1	1	1	1	1	1	1	1.31044	1	1	1	1	1	1	1	1.06311	1.52418	1	1	1.02355	1.22134	1.39862	1	1	1	1	1	1	1	1	1	1.20512	1.23328	1.44241	1	1	1	1	1
BIOCARTA_BIOPEPTIDES_PATHWAY_Up	1.19201	1.21314	1	1	1	1	1	1	1	1.21048	1.47719	1	1	1	1	1	1.19255	1	1	1.09997	1	1	1	1	1	1	1.54811	1	1	1	1	1	1	1.20623	1	1	1.47188	1	1.37999	1	1	1	1	1	1.09337	1	1
BIOCARTA_CARM_ER_PATHWAY_Down	1.26575	1.17042	1.19593	1	1	1	1.10326	1.66711	1.17731	1.88938	1.45519	1.57108	1.65578	2.04012	1.84332	1	1	1	1	1	1	1.84917	1	1	1	1	1.00509	1	1.03031	1.25007	1.24124	1.34829	1	1	1	1	1	1.58761	1.52383	1.15036	1.08255	1.21888	1.20089	1	1	1	1
BIOCARTA_CARM_ER_PATHWAY_Up	1	1	1	1	1	1	1	1	1	1	1	1	1	1	1	1	1.08519	1	1.33777	1	1	1	1	1	1	1	1	1	1	1	1	1	1	1	1	1	1	1	1	1	1	1	1	1	1	1	1
BIOCARTA_CELLCYCLE_PATHWAY_Down	1	1	1	1.49995	1.1739	1.48721	1	1	1	1.20273	1.28851	1	1	1.11547	1	1	1	1	1	1	1	1	1	1	1	1	1	1	1	1	1	1	1	1	1	1	1	1	1	1	1	1.02178	1	1	1	1	1
BIOCARTA_CELLCYCLE_PATHWAY_Up	1	1	1	1	1	1	1	1.81576	1	1	1	1	1	1	1	1	1	1	1	1	1	1	1	1	1	1	1	1	1	1	1	1	1	1	1	1	1	1	1	1	1	1	1	1	1	1.01784	1.43298
BIOCARTA_CERAMIDE_PATHWAY_Down	1	1	1.01763	1	1	1.10067	1	1	1	1	1	1	1	1	1	1	1	1	1.12832	1	1	1	1	1	1	1.05282	1	1	1	1	1	1	1	1	1.08826	1	1	1	1	1	1	1	1.01452	1	1	1	1
BIOCARTA_CERAMIDE_PATHWAY_Up	1	1	1	1	1	1	1.11907	1.24021	1	1.3141	1	1	1	1	1	1	1	1	1	1	1	1	1	1.32378	1	1	1	1	1	1.12081	1	1	1	1.06351	1	1	1.4887	1	1	1	1.30115	1.22995	1	1	1	1	1
BIOCARTA_CHEMICAL_PATHWAY_Down	1	1	1	1	1.33451	1	1	1	1	1.18435	1.2181	1.57264	1	1	1	1	1	1	1	1.20122	1.23847	1	1	1	1	1	1.04953	1.38754	1	1	1	1	1	1	1	1	1	1	1.24724	1	1.10401	1.08038	1	1	1	1	1
BIOCARTA_CHEMICAL_PATHWAY_Up	1	1	1	1	1	1	1	1	1	1	1	1	1	1	1	1	1	1	1	1	1	1	1	1	1	1	1	1	1	1	1	1	1	1	1	1	1	1	1	1	1	1	1	1	1	1.24523	1
BIOCARTA_CHREBP2_PATHWAY_Down	1.00482	1	1.02415	1	1.18407	1	1.43644	1	1	1	1	1	1	1	1	1.79439	1	1.5921	1	1.03101	1	1.01096	1	1	1	1.04677	1	1	1.34407	1	1	1	1	1	1	1.04842	1	1	1	1	1	1	1.01587	1.42533	1	1	1
BIOCARTA_CHREBP2_PATHWAY_Up	1	1	1	1	1	1.54042	1	1	1.19174	1	1.10205	1	1	1	1	1	1.24927	1	1	1	1	1	1	1.66293	1	1	1.09991	1	1	1	1	1	1	1	1	1	1.19038	1	1	1	1	1.00803	1	1	1	1	1
BIOCARTA_CREB_PATHWAY_Down	1	1	1	1	1.54309	1	1.31028	1.00515	1	1	1	1	1.2176	1.24371	1.38016	1.32984	1	1.35482	1	1.06926	1	1.36419	1	1	1.43902	1	1	1.08182	1.41829	1.2378	1	1	1	1	1	1	1	1	1	1	1	1	1	1.12726	1	1	1.27363
BIOCARTA_CREB_PATHWAY_Up	1.04382	1	1	1	1	1.08086	1	1	1	1	1.3681	1	1	1	1	1	1	1	1.42266	1	1	1	1	1	1	1	1.14102	1	1	1	1	1	1	1.3167	1	1	1.61161	1	1	1	1	1	1	1	1.10087	1.02494	1
BIOCARTA_CTCF_PATHWAY_Down	1	1	1	1	1	1	1	1	1.30564	1.30317	1.69307	1.26962	1.72126	1.75333	2.07583	1	1.20508	1.36778	1	1	1	2.03634	1	1	1	1.10863	1.00068	1	1	1	1	1	1	1	1	1	1	1	1	1.34325	1.28412	1.45559	1	1	1	1	1
BIOCARTA_CTCF_PATHWAY_Up	1	1	1	1	1	1	1.5945	1	1	1	1	1	1	1	1	1	1	1	1	1	1	1	1	1	1.35796	1	1	1	1	1	1	1	1	1	1	1	1	1	1	1	1	1	1	1	1	1	1
BIOCARTA_CXCR4_PATHWAY_Down	1	1	1	1	1	1	1	1	1	1	1	1.3363	1.50189	1.62755	1.53894	1.32643	1	1.3997	1	1	1	1.42887	1.11564	1	1	1	1	1	1	1	1	1	1	1	1	1	1	1	1	1	1.1113	1.04771	1	1	1	1	1
BIOCARTA_CXCR4_PATHWAY_Up	1	1	1	1	1	1.06271	1	1	1	1	1	1	1	1	1	1	1	1	1	1	1	1	1	1	1	1	1.31127	1	1	1	1	1	1	1	1	1	1.36418	1	1	1	1	1	1	1	1.22043	1	1
BIOCARTA_DEATH_PATHWAY_Down	1.08345	1	1.14017	1	1	1.24899	1	1	1	1	1.01688	1.46507	1	1	1	1	1	1	1	1	1	1	1	1	1	1	1	1	1	1	1	1.10018	1	1.12814	1.53926	1	1	1	1	1	1	1	1.13217	1	1	1	1
BIOCARTA_DEATH_PATHWAY_Up	1	1	1	1	1	1	1.41616	1	1	1	1	1	1	1	1	1.11297	1.08217	1.52857	1	1	1	1	1	1.15195	1	1	1	1	1	1.11391	1	1	1	1	1	1.02067	1.21022	1.16021	1	1	1.07036	1.22168	1	1.12233	1	1	1.23469
BIOCARTA_ECM_PATHWAY_Down	1	1	1	1	1	1	1	1	1	1	1	1	1.23249	1	1.0509	1	1	1	1	1	1	1	1	1	1	1	1	1	1	1	1	1	1.19039	1.14811	1	1	1	1	1	1	1.0291	1	1	1	1	1	1.06676
BIOCARTA_ECM_PATHWAY_Up	1	1	1	1.17154	1	1	1.43359	1	1	1.12476	1	1	1	1	1	1	1	1	1	1.14527	1.07342	1	1	1.26257	1.32127	1	1	1	1	1	1.41913	1	1	1	1	1	1.08451	1	1	1	1	1	1	1.30974	1	1	1
BIOCARTA_EDG1_PATHWAY_Down	1.05072	1	1.22075	1	1	1	1	1	1	1	1	1	1.79616	1	1.53117	1.48217	1	1	1	1	1	1.37782	1.09292	1.12169	1	1	1	1	1.61525	1.02314	1	1.48128	1.28978	1	1.32135	1	1	1	1	1.19394	1	1.10589	1.21826	1	1	1	1
BIOCARTA_EDG1_PATHWAY_Up	1	1	1	1	1	1	1.06891	1	1	1.28174	1.50621	1.38155	1	1	1	1	1.3635	1	1	1.46576	1.41866	1	1	1	1	1.00421	1.5185	1	1	1	1.02403	1	1	1	1	1	1.44823	1	1	1	1	1	1	1	1.54683	1.03792	1
BIOCARTA_EGF_PATHWAY_Down	1	1	1	1	1	1.30104	1	1	1	1	1	1	1.63898	1.06823	1.42838	1	1	1	1	1	1	1.22408	1	1	1.32221	1	1	1	1	1.58317	1	1	1	1	1	1	1	1	1	1.14188	1.70479	1.84143	1	1	1	1	1
BIOCARTA_EGF_PATHWAY_Up	1	1	1	1	1	1	1.0393	1	1	1.01906	1.22357	1	1	1	1	1.0866	1	1.06816	1	1.18822	1.02078	1	1	1	1	1	1.76452	1	1	1	1	1	1	1.17967	1	1	1.14361	1	1.2006	1	1	1	1	1.10416	1	1	1
BIOCARTA_EIF4_PATHWAY_Down	1	1	1	1	1.06091	1	1	1.09648	1.06536	1.49031	1.59444	1	1.34806	1.42336	1.38866	1.19955	1	1.1008	1	1	1	1.63561	1	1	1	1	1.09236	1.28197	1	1.16859	1	1	1	1	1	1	1	1	1	1	1	1.04278	1	1	1	1	1.47604
BIOCARTA_EIF4_PATHWAY_Up	1	1	1	1	1	1	1	1	1	1	1	1	1	1	1	1	1	1	1	1	1	1	1	1	1	1	1	1	1	1	1	1	1	1.33424	1	1.00806	1.70722	1	1	1	1	1	1	1.08307	1.20137	1	1
BIOCARTA_ERK_PATHWAY_Down	1	1	1	1	1	1	1	1	1	1	1	1	1.03189	1	1	1	1	1	1	1	1	1	1	1	1	1	1	1	1	1.34946	1	1	1	1	1	1	1	1	1	1	1	1	1	1	1	1.04949	1.33988
BIOCARTA_ERK_PATHWAY_Up	1	1	1	1	1	1	1.40191	1.45458	1.17388	1.39265	1.4641	1	1	1	1	1	1	1	1	1	1.12794	1	1	1	1	1	1.49882	1	1	1	1.01329	1	1	1	1	1.33729	1	1	1	1	1	1	1	1.6653	1.13973	1	1
BIOCARTA_FAS_PATHWAY_Down	1	1	1	1.09642	1.1481	1.29424	1	1.21724	1	1.57057	1.06528	1.85228	1	1	1.04397	1	1	1	1	1	1	1	1	1	1	1	1	1	1	1	1	1	1	1	1.08289	1	1	1	1.47159	1	1	1	1	1	1	1	1.16534
BIOCARTA_FAS_PATHWAY_Up	1	1	1	1	1	1	1.21913	1	1	1	1	1	1	1	1	1	1	1	1	1	1	1	1	1.33946	1	1	1	1	1	1	1	1	1	1	1	1.14481	1.49648	1	1	1.0461	1	1	1	1	1	1	1
BIOCARTA_FCER1_PATHWAY_Down	1.34012	1.32927	1.13105	1	1	1	1	1	1	1	1	1	1.17345	1	1.04975	1.069	1	1.06018	1	1	1	1	1	1	1	1.16064	1	1.07052	1.00036	1	1	1	1.28171	1	1	1	1	1	1	1.07791	1.28901	1.20788	1.15441	1	1	1	1
BIOCARTA_FCER1_PATHWAY_Up	1	1	1	1	1.04536	1	1.34993	1	1	1.25969	1.08513	1	1	1	1	1	1	1	1	1	1.0418	1	1	1.13691	1	1	1.17998	1	1	1	1	1	1	1	1	1	1	1	1	1	1	1	1	1	1	1	1
BIOCARTA_FMLP_PATHWAY_Down	1.20558	1	1.11289	1	1	1	1	1	1	1	1	1	1	1	1	1.36652	1	1.0209	1	1	1	1	1	1	1	1	1	1	1	1	1	1	1	1	1.09731	1	1	1	1	1.00223	1	1	1.1189	1	1	1	1
BIOCARTA_FMLP_PATHWAY_Up	1	1	1	1	1	1	1.19134	1	1	1.26623	1	1.12028	1	1	1	1	1	1	1.24994	1	1.19885	1	1	1	1	1	1	1	1	1	1	1.01218	1	1.03502	1	1	1.23144	1.10084	1	1	1	1	1	1	1	1.0805	1
BIOCARTA_G1_PATHWAY_Down	1.07695	1.02181	1	1.83702	1.45145	1.7288	1	1	1	1.45283	1.67972	1.30375	1	1.29827	1	1	1.09779	1.21621	1	1	1	1.1918	1	1.01286	1	1	1	1	1	1.38996	1.28916	1	1	1	1.09657	1	1	1	1	1.08276	1	1.03146	1	1	1	1	1
BIOCARTA_G1_PATHWAY_Up	1	1	1	1	1	1	1	1.02837	1	1	1	1	1	1	1	1	1	1	1	1	1	1	1	1	1.752	1	1	1	1	1	1	1	1.17404	1	1	1	1.39245	1	1	1	1	1	1	1	1	1.05907	1.04534
BIOCARTA_G2_PATHWAY_Down	1	1	1	1.59087	1.20606	1.44696	1	1	1	1.55043	1.38205	1	1	1.31977	1	1	1.57174	1	1	1	1	1	1	1	1	1	1.1971	1	1	1	1	1	1	1	1	1	1	1	1	1	1	1	1	1	1	1	1
BIOCARTA_G2_PATHWAY_Up	1.33573	1.13859	1.21363	1	1	1	1	1	1	1	1	1	1.03599	1	1	1	1	1	1	1	1	1	1	1	1.33618	1	1	1.00409	1	1	1	1	1	1	1	1	1	1	1	1	1	1	1.18528	1	1	1	1
BIOCARTA_GH_PATHWAY_Down	1	1	1	1	1	1	1	1	1.28023	1	1	1	1.35574	1.09621	1.2887	1	1	1	1.05455	1	1	1.09627	1	1	1	1	1	1	1	1.15687	1	1.18607	1	1.01122	1	1	2.03672	1	1	1.07786	1.0343	1	1	1	1	1	1
BIOCARTA_GH_PATHWAY_Up	1	1	1	1	1.05176	1	1.11481	1.09448	1	1.36029	1	1.90161	1	1	1	1	1.07705	1.01963	1	1.20696	1	1	1	1	1	1	1	2.56521	2.52082	1	1.40573	1	1	1	1.15204	1.0106	1	1	1	1	1	1	1	1.4633	1.25217	1.06321	1
BIOCARTA_GLEEVEC_PATHWAY_Down	1.24114	1.16273	1	1	1	1.37019	1	1	1	1	1	1	1	1	1	1	1	1	1.11318	1	1	1	1	1	1	1	1	1	1	1.3628	1.26019	1	1	1.01958	1	1	1	1	1.11	1	1.55132	1.42893	1	1	1	1	1
BIOCARTA_GLEEVEC_PATHWAY_Up	1	1	1	1	1	1	1	1	1	1	1	1	1	1	1	1.0596	1	1	1	1	1	1	1.22919	1	1	1	1.52684	1.17535	1	1	1	1	1	1	1.25811	1	1.13688	1	1	1	1	1	1	1	1	1	1
BIOCARTA_GPCR_PATHWAY_Down	1.12887	1.08146	1.24183	1	1	1	1	1	1	1	1	1	1.14772	1	1	1.49651	1	1.51951	1	1	1	1.13064	1.02188	1	1	1	1	1	1.06318	1.00541	1.31895	1	1.20486	1	1	1.06174	1	1	1	1	1.34257	1.15294	1.25687	1	1	1	1.13882
BIOCARTA_GPCR_PATHWAY_Up	1	1	1	1	1	1	1	1	1	1	1.21173	1	1	1	1	1	1	1	1.6802	1	1.43873	1	1	1	1	1	1.0516	1	1	1	1	1	1	1.24211	1	1	1.46816	1	1	1	1	1	1	1	1.15662	1	1
BIOCARTA_GSK3_PATHWAY_Down	1.11212	1.01058	1.01004	1.49248	1.65704	1.09107	1	1	1	1	1	1	1	1	1	1	1	1	1.5715	1	1.17051	1	1.09469	1	1	1	1	1	1	1	1	1	1.36274	1	1	1	1	1	1	1	1.41891	1.23716	1	1	1	1	1.34134
BIOCARTA_GSK3_PATHWAY_Up	1	1	1	1	1	1	1	1	1	1	1	1.20798	1	1.03822	1	1.15444	1	1.22354	1	1.16506	1	1	1	1	1.33004	1	1	1	1	1	1	1	1	1	1	1.0449	1.12327	1.67076	1	1	1	1	1	1.0461	1	1	1
BIOCARTA_HDAC_PATHWAY_Down	1.74588	1.77898	1.34749	1	1	1	1	1.4984	1	1	1	1	1.65168	1.66088	1.87901	1.47501	1	1	1	1	1	1.49171	1.00159	1	1	1	1	1	1.18004	1	1	1	1.27054	1	1	1.51213	1	1	1	1	1	1	1.34984	1	1	1	1
BIOCARTA_HDAC_PATHWAY_Up	1	1	1	1.10282	1	1.20064	1.39245	1	1	1	1	1	1	1	1	1	1.14692	1	1.21411	1.00322	1	1	1	1	1	1	1	1	1	1	1	1	1	1	1	1	1.20501	1	1	1	1	1	1	1.35042	1.43313	1.05105	1
BIOCARTA_HER2_PATHWAY_Down	1	1	1	1	1	1	1	1	1	1	1	1	2.01501	1.46324	1.86137	1	1	1	1	1	1	1.64571	1	1	1	1	1	1	1.09295	1	1	1	1	1	1	1	1	1	1	1	1.39337	1	1	1	1	1	1
BIOCARTA_HER2_PATHWAY_Up	1	1	1	1	1.49988	1	1	1	1	1.47406	1.15923	1	1	1	1	1	1.34654	1.35929	1	1.18873	1	1	1	1	1	1	1.03729	1	1	1	1	1	1	1	1.18797	1	1	1	1	1	1	1	1	1	1	1	1
BIOCARTA_HIVNEF_PATHWAY_Down	1	1	1	1	1	1	1	1.10508	1	1	1	1.28696	1	1.16921	1	1	1	1	1.15575	1	1	1	1	1	1	1	1	1	1	1	1	1	1	1.16556	1	1	1	1	1.19642	1	1	1	1	1	1	1	1
BIOCARTA_HIVNEF_PATHWAY_Up	1	1	1	1	1	1	1.47916	1	1	1	1	1	1	1	1	1.19778	1	1.20654	1	1.00983	1	1	1	1.47798	1.16736	1	1	1.01838	1	1.06483	1	1	1.1283	1	1	1	1.25686	1	1	1	1	1.1581	1	1	1	1	1
BIOCARTA_IGF1_PATHWAY_Down	1	1	1	1	1	1	1	1	1	1	1	1	1.48266	1.40252	1.53688	1	1	1	1	1	1	1.38064	1	1	1	1	1	1	1	1	1	1	1	1	1	1.11967	1	1	1	1	1.01341	1	1	1	1	1	1
BIOCARTA_IGF1_PATHWAY_Up	1	1	1	1	1.00356	1	1	1	1	1	1	1	1	1	1	1	1	1	1	1.23581	1.22672	1	1	1	1	1	1	1.03896	1	1	1	1	1	1	1	1	1.33909	1	1	1	1	1	1	1.37656	1.39354	1	1
BIOCARTA_IGF1R_PATHWAY_Down	1.10108	1	1	1	1	1	1	1	1	1	1	1	1	1	1	1.07676	1	1	1	1	1	1.02611	1	1	1.13198	1	1	1	1.22883	1.12825	1	1	1	1	1	1	1	1	1	1	1	1	1	1	1	1	1.10599
BIOCARTA_IGF1R_PATHWAY_Up	1	1	1	1	1	1.23357	1	1	1.24448	1.02489	1.13948	1	1	1	1	1	1	1	1	1	1	1	1	1	1	1	1.00394	1	1	1	1	1	1	1.09282	1	1	1.53429	1	1	1.12224	1	1	1	1	1	1	1
BIOCARTA_IL1R_PATHWAY_Down	1.5602	1.06612	1.58542	1	1	1.55791	1	1	1	1	1	1	1.13886	1.66591	1.52266	1	1.0476	1	1	1	1	1.08011	1	1	1	1	1	1	1	1	1	1	1	1.21354	1	1	1	1	1	1	1.33046	1.11286	1.57516	1	1	1	1.20431
BIOCARTA_IL1R_PATHWAY_Up	1	1	1	1	1	1	1.45592	1	1	1.07401	1	1	1	1	1	1.31694	1	1.18913	1	1	1	1	1.14021	1	1.39477	1	1.09029	1	1	1	1	1	1	1	1.34707	1	1.03983	1.35923	1.27055	1	1	1	1	1.14174	1.27295	1.26145	1
BIOCARTA_IL2RB_PATHWAY_Down	1.38378	1.00553	1.37401	1	1	1	1	1	1	1	1	1	1	1	1	1	1	1	1.19802	1	1.17099	1.02677	1	1	1	1	1	1	1.1035	1	1	1	1	1	1	1	1	1	1.01179	1	1	1	1.35699	1	1	1	1.392
BIOCARTA_IL2RB_PATHWAY_Up	1	1	1	1	1.06822	1	1.13733	1	1	1	1	1	1	1	1	1	1	1.02766	1	1.01091	1	1	1.01319	1.10692	1	1	1.65997	1	1	1	1	1	1	1	1	1	1.27235	1	1	1	1	1	1	1.06825	1	1	1
BIOCARTA_IL6_PATHWAY_Down	1	1	1.12149	1	1	1	1	1	1	1	1	1	1.22024	1	1	1	1	1	1	1	1	1	1	1	1	1	1	1	1	1	1	1	1	1	1	1	1	1	1	1	1	1	1.12699	1	1	1	1
BIOCARTA_IL6_PATHWAY_Up	1	1	1	1	1	1	1	1	1	1.51383	1.34808	1	1	1	1	1	1	1.00453	1.10482	1.17939	1.62596	1	1	1	1	1	1	1	1	1	1	1	1	1	1	1	1	1	1	1	1	1	1	1.29769	1	1	1
BIOCARTA_INSULIN_PATHWAY_Down	1	1	1	1	1	1	1	1	1	1	1	1	1.23705	1.41796	1.47788	1	1.054	1	1	1	1	1.34485	1	1	1	1	1	1	1	1	1	1.13014	1	1	1	1	1	1	1	1	1	1	1	1	1	1	1
BIOCARTA_INSULIN_PATHWAY_Up	1	1	1	1	1	1	1	1	1	1	1	1	1	1	1	1	1	1	1	1	1	1	1	1	1	1	1.06142	1	1	1	1	1	1	1	1	1	1	1	1	1	1	1	1	1.10946	1	1	1
BIOCARTA_INTEGRIN_PATHWAY_Down	1	1	1	1	1	1.02874	1	1	1	1	1	1	1	1	1.09289	1.09169	1	1	1	1	1	1	1.05474	1	1	1	1	1	1.11574	1.62841	1	1.29881	1.27944	1.2496	1	1	1	1	1.19502	1	1	1	1	1	1	1	1.33592
BIOCARTA_INTEGRIN_PATHWAY_Up	1	1.33913	1	1	1	1	1.0697	1.38578	1	1	1	1	1	1	1	1	1	1	1	1.12977	1.22022	1	1	1	1.45854	1	1	1	1	1	1	1	1	1	1	1.25747	1	1	1	1	1	1	1	1.29599	1	1	1
BIOCARTA_KERATINOCYTE_PATHWAY_Down	1	1	1	1.02523	1	1.19749	1	1	1	1	1	1	1.22189	1.27702	1.28705	1	1	1	1	1	1	1.02209	1	1	1	1	1	1	1	1	1	1	1	1	1	1	1	1	1	1.20416	1.11042	1.32298	1	1	1	1	1
BIOCARTA_KERATINOCYTE_PATHWAY_Up	1	1	1	1	1	1	1.34607	1	1	1.33914	1.18814	1.1066	1	1	1	1	1	1.34539	1	1.01863	1	1	1	1	1	1.12415	1.27858	1	1	1	1.27079	1.48404	1.4539	1.34863	1	1	1.16818	1.15567	1	1	1	1	1	1.22632	1.17643	1.24524	1
BIOCARTA_MAPK_PATHWAY_Down	1	1.0928	1	1.25825	1	1.47746	1	1	1	1	1	1	1.19013	2.00431	1.78777	1	1.11296	1	1	1	1	1.62345	1	1	1	1.01756	1	1	1	1	1	1	1	1	1.00143	1	1	1	1	1.16502	1	1.17907	1	1	1	1	1.00633
BIOCARTA_MAPK_PATHWAY_Up	1	1	1	1	1	1	1	1	1	1	1	1	1	1	1	1.09853	1	1	1	1	1	1	1	1	1	1	1	1	1	1.02815	1	1	1	1.17706	1	1	1.35898	1	1	1	1	1	1	1	1	1	1
BIOCARTA_MCALPAIN_PATHWAY_Down	1	1	1	1	1	1	1	1	1	1	1	1	1	1	1	1.34376	1	1	1	1	1	1	1	1	1	1	1	1	1	1	1	1	1	1	1	1	1	1	1	1	1	1	1	1	1	1	1
BIOCARTA_MCALPAIN_PATHWAY_Up	1.00915	1.21742	1	1	1.14547	1	1	1.04015	1	1	1	1	1	1	1	1	1.31362	1	1.07862	1.16682	1.12206	1	1	1	1	1	1.20093	1	1	1	1	1	1	1	1	1	1	1	1	1	1	1	1	1	1	1.25961	1
BIOCARTA_MET_PATHWAY_Down	1	1.16291	1	1	1	1	1	1	1	1	1	1	1.38325	1.55661	1.59376	1.10541	1	1	1	1	1	1.51515	1	1	1	1	1	1	1.17024	1.05151	1	1.10917	1.17135	1	1	1.21299	1	1	1.59347	1	1.2281	1	1	1	1	1	1
BIOCARTA_MET_PATHWAY_Up	1	1	1	1	1	1	1	1.24834	1	1	1.24599	1	1	1	1	1	1.19227	1	1	1	1	1	1	1	1	1	1.46825	1	1	1	1	1	1	1	1	1	1.25824	1	1	1	1	1	1	1	1.14691	1	1
BIOCARTA_MITOCHONDRIA_PATHWAY_Down	1	1	1	1	1	1	1	1	1	1	1	1	1	1	1	1	1	1	1	1	1	1	1	1	1	1	1	1	1	1	1	1	1	1	1	1	1	1	1.19962	1	1	1	1	1	1	1	1
BIOCARTA_MITOCHONDRIA_PATHWAY_Up	1	1	1	1	1	1	1	1	1	1	1	1	1.03852	1	1	1	1.10419	1.36734	1	1	1	1	1	1	1	1	1	1	1	1	1	1	1	1	1	1	1	1	1	1	1	1	1	1	1	1.25917	1
BIOCARTA_MPR_PATHWAY_Down	1	1	1	1	1.44927	1	1	1	1	1	1	1	1	1	1	1.4152	1	1.25743	1	1	1	1	1	1	1	1	1	1	1.26862	1	1	1	1	1	1.22067	1.05589	1	1	1	1	1	1	1	1.00537	1	1	1
BIOCARTA_MPR_PATHWAY_Up	1	1	1	1	1	1.54596	1	1.73591	1.51284	1	1.09437	1.16291	1.58409	1	1.15837	1	1.13075	1	1	1	1	1	1	1.05891	1	1	1	1	1	1.35279	1.13339	1	1	1	1	1	1.46751	1	1	1	1	1	1	1	1	1.13843	1
BIOCARTA_MTOR_PATHWAY_Down	1.1346	1	1	1	1.4648	1	1	1.10849	1.24875	1.71793	1.71664	1	1	1.31518	1.23623	1.02701	1	1.38932	1	1	1	1.45191	1	1	1	1	1.21143	1.12754	1	1.11632	1	1	1	1	1	1	1	1.34009	1	1	1.01504	1.08216	1	1	1	1	1.12526
BIOCARTA_MTOR_PATHWAY_Up	1	1	1	1	1	1	1	1	1	1	1	1	1	1	1	1	1	1	1	1	1	1	1	1	1	1	1	1	1	1	1	1	1	1	1	1	1.35516	1	1	1	1	1	1	1	1	1	1
BIOCARTA_MYOSIN_PATHWAY_Down	1	1	1	1	1	1.21285	1	1.08622	1	1	1	1	2.06988	1.62339	1.86059	1.10316	1	1.0114	1	1	1	2.00677	1.17837	1.18455	1.15901	1	1	1.0702	1.44362	1.11239	1	1	1.18938	1.2729	1	1	1	1	1	1.55946	1.51667	1.77621	1	1	1	1	1
BIOCARTA_MYOSIN_PATHWAY_Up	1	1	1	1.17654	1	1	1	1	1	1	1	1	1	1	1	1	1	1	1	1	1	1	1	1	1	1	1	1	1	1	1	1	1	1	1.10879	1.63451	1	1	1	1	1	1	1	1	1	1.04171	1
BIOCARTA_NFAT_PATHWAY_Down	1.27627	1.1481	1.23179	1	1	1	1	1	1	1	1	1	1.12792	1	1.00909	1.74391	1	1.20657	1	1	1	1	1	1	1	1.01915	1	1	1.35038	1	1	1	1.46552	1	1	1.05886	1	1	1	1	1	1	1.25602	1	1	1	1
BIOCARTA_NFAT_PATHWAY_Up	1	1	1	1	1	1.22483	1.14169	1	1	1.06449	1.04201	1.11222	1	1	1	1	1.33405	1	1.77289	1.0311	1.5121	1	1	1.51661	1	1	1	1	1	1	1	1	1	1	1	1	1.53709	1	1	1	1	1	1	1.6119	1.51709	1.32528	1
BIOCARTA_NFKB_PATHWAY_Down	1	1	1	1	1	1	1	1	1	1	1	1	1	1.51875	1.26935	1	1	1	1.32807	1	1	1.024	1.13974	1	1	1.11409	1	1	1	1	1	1	1	1	1	1	1	1	1	1	1.13163	1.13596	1	1	1	1	1
BIOCARTA_NFKB_PATHWAY_Up	1	1	1	1	1.09479	1	1	1	1	1	1	1	1	1	1	1.15892	1	1.14128	1	1.1213	1	1	1	1	1.01741	1	1	1	1	1	1	1	1	1	1	1	1	1.18044	1	1	1	1	1	1	1	1	1
BIOCARTA_NO1_PATHWAY_Down	1	1	1	1	1	1	1	1	1.07742	1	1	1	1.56182	1.26927	1.32532	1.36066	1	1	1	1	1	1.26349	1	1	1	1	1.3967	1.17739	1.33071	1	1	1	1	1	1	1	1	1	1	1.44967	1.51472	1.59055	1	1	1	1	1
BIOCARTA_NO1_PATHWAY_Up	1	1	1	1	1.19814	1	1	1	1	1	1	1	1	1	1	1	1.26031	1	1.53671	1	1.34696	1	1	1	1	1	1	1	1	1	1	1.29334	1	1.19965	1.5512	1.15782	1	1	1	1	1	1	1	1.13814	1.46818	1.60801	1
BIOCARTA_NOS1_PATHWAY_Down	1	1	1	1	1	1	1	1	1	1	1	1	1	1.37258	1	1.67542	1	1.24303	1	1	1	1.43304	1	1	1	1	1	1	1.36689	1	1	1	1	1	1	1	1	1	1	1	1.06069	1	1	1	1	1	1
BIOCARTA_NOS1_PATHWAY_Up	1	1	1	1	1	1	1	1	1	1	1	1	1	1	1	1	1.34089	1	1.85746	1	1.48761	1	1	1	1	1.65792	1	1	1	1	1	1.0512	1	1	1	1.29894	1	1	1	1	1	1	1	1	1	1.38502	1
BIOCARTA_NTHI_PATHWAY_Down	1	1	1	1	1	1	1	1	1	1.04954	1.21741	1	1.35499	1.99238	1.68734	1	1.34361	1	1.20019	1	1	1.58214	1	1	1	1	1	1	1	1	1	1	1	1.01023	1.12738	1	1	1	1	1	1.02215	1	1	1	1	1	1
BIOCARTA_NTHI_PATHWAY_Up	1	1	1	1	1	1	1.23466	1	1	1	1	1	1	1	1	1.35734	1	1.02383	1	1.06003	1	1	1	1	1.61783	1	1	1	1	1	1	1	1.03508	1	1	1	1.5145	1.11624	1	1	1	1	1	1.17461	1	1	1
BIOCARTA_P38MAPK_PATHWAY_Down	1	1	1	1.30365	1.34813	1.1885	1	1.1187	1	1	1.35385	1	1.04605	1.80983	1.44477	1	1	1.07151	1	1	1	1.52944	1	1	1	1	1.27947	1	1	1	1	1	1	1	1	1	1	1	1	1.02113	1.18199	1.25432	1	1	1	1	1
BIOCARTA_P38MAPK_PATHWAY_Up	1	1	1	1	1	1	1.4145	1	1	1	1	1	1	1	1	1	1	1	1	1	1	1	1	1	1	1	1	1	1	1.03779	1	1.28245	1	1.42506	1	1	1.18948	1	1	1	1	1	1	1	1	1	1
BIOCARTA_P53HYPOXIA_PATHWAY_Down	1.31709	1	1.24823	1	1	1	1	1	1	1	1.26277	1	1	1	1	1	1.07258	1.01904	1	1	1	1	1	1	1	1	1	1	1	1	1	1.00218	1	1	1.52151	1	1	1	1	1	1	1	1.24985	1	1	1	1.11599
BIOCARTA_P53HYPOXIA_PATHWAY_Up	1	1	1	1	1	1	1.49964	1	1.03663	1.20842	1	1.23796	1	1	1	1	1	1	1	1.03892	1	1	1	1	1.24601	1	1	1.23103	1	1	1	1	1	1.17375	1	1	1.57455	1	1	1	1.02536	1.04165	1	1.44255	1.04067	1	1
BIOCARTA_PAR1_PATHWAY_Down	1	1	1	1	1	1	1	1.16808	1	1	1	1	2.21477	1.85793	2.07035	1.15726	1	1	1	1	1	2.11552	1.36393	1.14019	1	1	1	1	1.28014	1.2367	1.36527	1	1	1.19501	1	1	1	1	1	1.40141	1.52692	1.70335	1	1	1	1	1.06657
BIOCARTA_PAR1_PATHWAY_Up	1	1	1.02243	1	1	1	1	1	1	1	1	1	1	1	1	1	1.11377	1	1	1	1	1	1	1	1	1	1.41382	1	1	1	1	1	1	1	1.21611	1.50226	1.07839	1	1	1	1	1	1.00232	1	1	1.02128	1
BIOCARTA_PDGF_PATHWAY_Down	1	1.02191	1	1	1	1.25732	1	1	1	1	1	1	1.53075	1	1.3265	1	1	1	1.0392	1	1	1.25358	1	1	1	1	1	1	1.0831	1.49486	1	1	1	1	1	1	1	1	1	1	1.71507	1.57583	1	1	1	1	1
BIOCARTA_PDGF_PATHWAY_Up	1	1	1	1	1.03371	1	1.24417	1	1	1.17167	1.45827	1	1	1	1	1	1	1	1	1.02863	1	1	1	1	1	1	1.69974	1	1	1	1	1	1	1.00735	1	1	1.11094	1	1.19862	1	1	1	1	1.34166	1.34985	1	1
BIOCARTA_PGC1A_PATHWAY_Down	1	1	1	1	1	1	1.69371	1.2203	1	1	1	1	1.44027	1.48975	1.63369	1.44015	1	1.34055	1	1	1	1.39495	1.44723	1	1.06223	1	1	1.20241	1.43558	1	1.22888	1.34784	1	1	1	1.40465	1	1	1	1.5894	1	1.17248	1	1	1	1	1
BIOCARTA_PGC1A_PATHWAY_Up	1	1	1	1.24492	1	1.25254	1	1	1	1	1.44379	1.34358	1	1	1	1	1	1	1.51648	1	1.16572	1	1	1	1	1	1.29255	1	1	1	1	1	1	1.30945	1	1	1	1	1	1	1	1	1	1	1.24854	1.27211	1
BIOCARTA_PPARA_PATHWAY_Down	1.13893	1.2664	1	1	1	1	1	1.59223	1.11433	1	1	1	1.56604	1.4888	1.71648	1.2382	1	1	1	1	1	1.60459	1	1	1	1	1	1	1.25085	1.53597	1	1	1	1	1	1	1	1	1	1	1.49147	1.29844	1	1	1	1	1.15367
BIOCARTA_PPARA_PATHWAY_Up	1	1	1	1	1.08681	1	1	1	1	1	1	1	1	1	1	1	1	1	1	1.03212	1	1	1	1	1	1	1.02903	1.3339	1	1	1	1	1	1	1.06427	1	1.41714	1	1.37641	1	1	1	1	1.1054	1.28754	1.20403	1
BIOCARTA_PROTEASOME_PATHWAY_Down	1	1	1	1	1.25517	1	1.12056	1	1	1	1	1	1	1	1	1	1	1	1	1	1	1	1	1	1	1	1.15044	1	1	1	1	1.15062	1	1	1.75442	1.83312	1	1	1.06825	1	1	1	1	1	1.49797	1	1
BIOCARTA_PROTEASOME_PATHWAY_Up	1	1	1	1	1	1.88997	1	2.3063	1.62145	1.74811	1	2.06625	2.30959	1.95696	2.21576	1	1	1	1	1	1	2.05802	1	1	1	1	1	1	1	1.99838	1	1	1	1	1	1	1	1	1	1.21185	1	1.01393	1	1	1	1	1.78745
BIOCARTA_PTDINS_PATHWAY_Down	1	1	1	1.12619	1	1	1	1.40878	1.08327	1.07189	1	1	1.30997	1.41321	1.4061	1.14998	1	1.1188	1	1	1	1.36724	1	1.24235	1	1.00166	1	1.59217	1.10601	1.21155	1	1	1	1	1	1	1	1	1	1.32007	1.08297	1.11612	1	1	1.0313	1.15794	1
BIOCARTA_PTDINS_PATHWAY_Up	1	1	1	1	1	1	1	1	1	1	1	1	1	1	1	1	1	1	1	1	1	1	1	1	1	1	1	1	1	1	1	1	1	1	1	1.16369	1.46554	1	1	1	1	1	1	1	1	1	1
BIOCARTA_PYK2_PATHWAY_Down	1	1	1	1	1.17707	1	1	1	1	1	1	1	1.06856	1	1.11194	1.29329	1	1	1	1	1	1.00261	1	1	1	1	1	1	1.03226	1.2984	1	1	1.05684	1	1	1	1	1	1	1	1	1	1	1	1	1	1
BIOCARTA_PYK2_PATHWAY_Up	1	1	1	1	1	1	1	1.05445	1.16054	1	1	1	1	1	1	1	1.14578	1	1.00741	1	1	1	1	1	1	1	1.39926	1	1	1	1	1	1	1.33281	1	1	1.60621	1	1	1	1	1	1	1	1	1	1
BIOCARTA_RAC1_PATHWAY_Down	1	1	1	1	1	1	1	1.22698	1	1	1	1	1.4488	1.24735	1.21572	1.21534	1	1	1	1	1	1.05029	1	1	1	1	1	1	1.42023	1.54066	1	1	1	1.03979	1	1	1	1	1	1.07196	1	1.29748	1	1	1	1	1
BIOCARTA_RAC1_PATHWAY_Up	1	1	1	1	1.18658	1	1.25309	1	1	1	1	1.25227	1	1	1	1	1.52219	1	1.09405	1	1	1	1	1	1	1	1	1	1	1	1	1	1	1	1	1	1	1	1	1	1	1	1	1	1	1	1
BIOCARTA_RACCYCD_PATHWAY_Down	1.11948	1	1	1.15018	1.32188	1.04858	1	1	1	1	1.24827	1	1	1	1	1	1	1	1	1	1	1	1	1	1	1	1	1	1	1	1.43607	1	1.2198	1	1.23775	1.38533	1	1	1	1	1	1	1.00008	1	1.14552	1	1
BIOCARTA_RACCYCD_PATHWAY_Up	1	1	1	1	1	1	1	1.20996	1	1	1	1	1	1	1	1	1	1	1	1	1	1	1	1	1.13517	1	1	1	1	1	1	1	1	1.06732	1	1	1.86544	1	1	1	1	1	1	1	1	1	1
BIOCARTA_RAS_PATHWAY_Down	1	1.30787	1	1	1	1	1	1	1	1	1	1	1	1	1	1	1	1	1	1	1.36982	1	1	1	1	1	1	1	1	1.00012	1	1	1.28867	1	1	1	1	1	1	1	1	1	1	1	1	1	1
BIOCARTA_RAS_PATHWAY_Up	1	1	1	1	1	1	1	1	1	1.03248	1.17729	1	1	1	1	1	1	1	1	1	1	1	1	1	1.0297	1	1.17302	1	1	1	1	1	1	1	1.04508	1	1.28793	1.20244	1	1	1	1	1	1	1	1	1
BIOCARTA_RHO_PATHWAY_Down	1	1	1	1	1	1	1	1	1.00378	1	1	1	1.08467	1	1.11722	1.0002	1	1	1	1	1	1	1	1	1	1.34196	1.03651	1	1	1.06568	1	1	1	1.30386	1.13238	1	1	1	1.14121	1	1.12555	1.07335	1	1	1	1	1
BIOCARTA_RHO_PATHWAY_Up	1.03278	1.25279	1	1.32357	1.14971	1.32854	1.18257	1	1	1	1	1	1	1	1	1	1.00351	1	1	1.00971	1	1	1	1.5518	1	1	1	1	1	1	1.51241	1	1	1	1	1.24253	1.24357	1.44323	1	1	1	1	1	1.52891	1	1	1
BIOCARTA_STRESS_PATHWAY_Down	1	1	1	1.5963	1	1.61413	1	1	1	1	1.20891	1	1	1.23324	1	1	1	1	1	1	1	1	1	1	1	1	1	1	1	1	1	1	1	1	1	1	1	1	1	1	1	1	1	1	1	1	1
BIOCARTA_STRESS_PATHWAY_Up	1.22249	1	1.36322	1	1	1	1.3891	1	1	1	1	1	1	1	1	1.64336	1	1.44311	1	1.1446	1	1	1.11014	1	1.44365	1	1	1	1.14468	1.35229	1	1	1	1	1	1	1.48169	1	1	1	1	1	1.38235	1	1	1	1
BIOCARTA_TCR_PATHWAY_Down	1.16644	1.1639	1.17906	1	1	1.17142	1	1	1	1	1	1	1.03595	1	1.06603	1.18864	1	1	1	1	1	1	1	1	1	1	1	1	1	1.27914	1.29482	1.05614	1.14031	1	1	1	1	1	1	1.12607	1.326	1.20214	1.18806	1	1	1	1
BIOCARTA_TCR_PATHWAY_Up	1	1	1	1	1	1	1.22372	1	1	1.10998	1	1	1	1	1	1	1	1	1	1	1.29246	1	1	1	1	1	1.27857	1	1	1	1	1	1	1	1	1	1.24038	1	1	1	1	1	1	1	1.02991	1	1
BIOCARTA_TFF_PATHWAY_Down	1	1	1	1	1	1	1	1	1.31607	1	1	1	1	1	1	1	1	1	1.01528	1	1	1	1	1	1	1	1	1	1	1	1	1.29433	1	1	1	1	2.20818	1	1	1	1	1	1	1	1	1	1
BIOCARTA_TFF_PATHWAY_Up	1	1	1	1	1	1	1.56209	1	1	1.58733	1	2.06172	1	1	1	1	1.3125	1.16713	1	1.25191	1	1	1	1	1	1	1	2.63723	2.50884	1	1	1	1	1	1	1	1	1	1	1	1	1	1	1	1	1	1
BIOCARTA_TNFR1_PATHWAY_Down	1	1	1	1.02142	1.20161	1.02324	1	1	1	1.21276	1.16625	1.56566	1	1.31815	1	1	1	1	1	1	1	1	1	1	1	1	1	1	1	1	1	1	1	1	1.16872	1.1784	1	1.03756	1.37919	1	1	1	1	1	1	1	1.05791
BIOCARTA_TNFR1_PATHWAY_Up	1.24165	1.28302	1.16607	1	1	1	1.17022	1	1	1	1	1	1	1	1	1	1	1	1	1.26034	1.34756	1	1	1.34995	1.07357	1	1	1.02416	1	1.3498	1	1	1.13896	1	1	1	1.31656	1	1	1	1.15634	1	1.15901	1	1	1	1
BIOCARTA_TOLL_PATHWAY_Down	1.03433	1	1.07168	1.32405	1	1.71512	1	1	1	1	1	1	1.32089	1.63701	1.76398	1	1.07269	1	1.35672	1	1	1.07809	1.20205	1	1	1	1	1.22429	1	1	1	1	1.14243	1	1	1	1	1	1.10758	1	1.56755	1.30617	1.06775	1	1	1	1
BIOCARTA_TOLL_PATHWAY_Up	1	1	1	1	1	1	1.11407	1	1	1.0153	1	1.60436	1	1	1	1.56719	1	1.42781	1	1.22856	1	1	1	1	1.19621	1	1.05462	1	1	1	1	1	1	1	1	1	1.094	1.71003	1	1	1	1	1	1	1	1	1
BIOCARTA_TPO_PATHWAY_Down	1	1	1	1	1	1	1	1	1	1	1	1	1.20036	1	1.14733	1	1	1	1.0304	1	1	1	1	1	1	1	1	1	1	1	1	1	1	1	1	1	1	1	1	1	1.33199	1.55261	1	1	1	1	1
BIOCARTA_TPO_PATHWAY_Up	1	1	1	1	1	1	1	1	1	1	1.18449	1	1	1	1	1	1	1.05979	1	1.12657	1	1	1	1	1	1	1.507	1	1	1	1	1	1	1	1	1	1.18531	1	1	1	1	1	1	1	1.09732	1	1
BIOCARTA_VEGF_PATHWAY_Down	1	1	1	1	1	1	1	1	1.20849	1	1.46503	1	1	1.11455	1	1	1	1	1	1	1	1	1.15164	1	1	1	1.26948	1.25044	1.0393	1.07084	1	1	1	1.07919	1	1	1	1	1	1.50798	1.45296	1.6769	1	1	1	1	1
BIOCARTA_VEGF_PATHWAY_Up	1	1	1	1	1.06499	1	1	1	1	1	1	1	1	1	1	1	1	1	1	1.19151	1	1	1	1	1	1	1	1	1	1	1	1	1	1	1.46483	1	1	1	1	1	1	1	1	1.07308	1.39464	1.35867	1
BIOCARTA_VIP_PATHWAY_Down	1.25547	1.22499	1.31827	1	1	1.2975	1	1.14961	1	1	1	1	1.15222	1	1.01489	1.41039	1	1.05322	1	1	1	1.10495	1	1	1.04723	1	1	1	1.08147	1.00041	1.19238	1	1	1	1.03932	1.19078	1	1	1	1	1.15663	1	1.33456	1.1936	1	1	1.39262
BIOCARTA_VIP_PATHWAY_Up	1	1	1	1.09223	1	1	1	1	1	1.08881	1.19833	1	1	1	1	1	1.16194	1	1.45596	1	1	1	1	1.08709	1	1.2768	1.2069	1	1	1	1	1	1	1	1	1	1.29118	1	1	1	1	1	1	1	1	1.00267	1
BIOCARTA_WNT_PATHWAY_Down	1.27049	1.12858	1.07385	1.74548	1.61877	1.17816	1	1	1	1	1.39492	1	1	1.04835	1	1	1.04261	1.06984	1	1	1	1	1	1	1	1.35159	1.1371	1.21559	1.50282	1.02063	1	1	1	1	1	1	1	1.5709	1	1	1.36662	1.6828	1.09035	1	1	1	1.13185
BIOCARTA_WNT_PATHWAY_Up	1	1	1	1	1	1	1	1	1	1	1	1	1	1	1	1	1	1	1	1	1	1	1.12339	1	1	1	1	1	1	1	1	1	1	1	1	1.06469	1.25347	1	1	1	1	1	1	1.00321	1.04177	1	1
BLALOCK_ALZHEIMERS_DISEASE_DN_Down	1.09856	1.10461	1	1	1	1	1.01261	1	1	1	1	1	1	1	1	2.01628	1	1.32263	1	1	1	1	1	1	1.41745	1	1	1	1	1	1	1	1	1	1.19189	1.64523	1	1	1	1	1	1	1	1	1	1	1
BLALOCK_ALZHEIMERS_DISEASE_DN_Up	1	1	1	1	1	1.84271	1	1	1	1.09504	1	1.58567	1.50631	1.51378	1.59365	1	1.61643	1	1	1	1.00315	1.24575	1	1	1	1	1	1	1	1.08791	1	1	1	1	1	1	1	1	1	1.0444	1	1	1	1	1	1	1
BLALOCK_ALZHEIMERS_DISEASE_INCIPIENT_DN_Down	1.06964	1.2062	1	1.06854	1	1	1	1.05386	1.11184	1	1.02583	1	1	1	1	1.58078	1	1.36053	1	1	1	1	1	1	1.47008	1	1	1	1	1	1	1	1	1	1	1.16622	1	1	1	1	1.00717	1	1	1.09229	1	1	1
BLALOCK_ALZHEIMERS_DISEASE_INCIPIENT_DN_Up	1	1	1	1	1	1.18233	1	1	1	1	1	1.39178	1.38072	1.55559	1.34782	1	1.30691	1	1	1	1	1.05916	1	1	1	1	1	1	1	1	1	1	1	1	1	1	1	1	1	1	1	1	1	1	1	1	1
BLALOCK_ALZHEIMERS_DISEASE_INCIPIENT_UP_Down	1	1	1	1.32059	1	1.5568	1	1.05672	1.19637	1.10784	1.48816	1.25706	1	1	1	1	1.23041	1	1.15201	1	1	1	1	1	1	1	1	1	1	1.62377	1	1	1.00751	1.00834	1	1	1.13268	1	1.03497	1	1.28265	1	1	1	1	1	1.22531
BLALOCK_ALZHEIMERS_DISEASE_INCIPIENT_UP_Up	1	1	1.0559	1	1	1	1.64548	1	1	1	1	1	1	1	1	1.64845	1	1.52635	1	1.33107	1.1834	1.08462	1.06223	1	1.05134	1	1	1.65387	1.58641	1	1.3372	1	1	1	1	1.66797	1	1	1	1.16163	1	1	1.04909	1.51422	1.20791	1.1439	1
BLALOCK_ALZHEIMERS_DISEASE_UP_Down	1	1	1	1.28412	1	1.57184	1	1.14722	1	1.08631	1.47115	1.25573	1.13911	1.17858	1.18331	1	1.39937	1	1.21736	1	1	1	1	1	1	1.03164	1	1	1	1.60416	1	1	1.14797	1.30399	1.00043	1	1	1.00167	1	1	1.27056	1	1	1	1	1	1.20186
BLALOCK_ALZHEIMERS_DISEASE_UP_Up	1	1	1	1	1	1	1.41257	1	1	1	1	1	1	1	1	1.63042	1	1.26721	1	1.33682	1.15368	1	1	1	1.34373	1	1	1	1.02734	1	1.32446	1	1	1	1	1.65439	1	1	1	1	1	1	1	1.35689	1.0065	1	1
BLUM_RESPONSE_TO_SALIRASIB_DN_Down	1	1	1	2.0382	1	1.86569	1	1	1.09147	2.02034	2.15423	1.91303	1	1.1	1	1.13828	1	1	1	1	1	1	1	1	1	1	1.07575	1	1	1	1	1.07242	1	1	1.44213	1.35042	1	2.24257	1.86352	1	1	1	1	1	1	1	1.10938
BLUM_RESPONSE_TO_SALIRASIB_DN_Up	1	1	1	1	1	1	1	1.5018	1	1	1	1	1.57746	1	1.20644	1	1.17798	1.11053	1	1.15936	1.38792	1.29227	1	1	2.34498	1	1	1.25187	1.53399	1	1.1795	1	1	1	1	1	1	1	1	1	1	1	1	1	1	1	1
BLUM_RESPONSE_TO_SALIRASIB_UP_Down	1	1	1.18374	1	1	1	1	1	1	1	1.24415	1	1	1	1	1	1	1	1	1	1	1	1	1	1	1	1	1	1	1	1	1	1	1	1	1	1	1	1	1	1	1	1.19481	1	1	1	1
BLUM_RESPONSE_TO_SALIRASIB_UP_Up	1	1	1	1	1	1	1	1.14693	1	1	1	1.34042	1.16705	1	1	1	1	1	1	1	1	1	1.04945	1	1	1	1	1	1	1	1	1	1	1	1	1	1	1.0289	1.86499	1	1	1	1	1.63867	1	1	1.4118
BOCHKIS_FOXA2_TARGETS_Down	1	1	1.04431	1	1	1	1	1	1	1	1.2871	1	1	1	1	1	1.00499	1	1.32139	1	1	1	1	1	1	1	1	1	1	1	1	1	1	1.15291	1	1	1	1	1	1	1.0167	1	1.0545	1	1	1	1.27127
BOCHKIS_FOXA2_TARGETS_Up	1	1	1	1.02625	1.04288	1	1.24393	1.23117	1	1.24565	1	1.27417	1.14202	1.0849	1.15478	1.40723	1	1.26781	1	1.24229	1	1.15476	1	1	1.03075	1	1.09243	1	1.10854	1.01087	1	1.13125	1.32817	1	1	1	1.41836	1.13134	1.27687	1	1	1	1	1.40934	1.04651	1	1
BOGNI_TREATMENT_RELATED_MYELOID_LEUKEMIA_DN_Down	1.35871	1.25349	1.25445	1.16954	1.19823	1.30047	1.52365	1.15173	1.61858	1.61148	1.23924	1.15212	1	1	1.14618	1	1.11788	1.31979	1	1	1	1.09372	1	1	1	1	1	1	1	1.46061	1	1	1.01622	1.31978	1	1	1	1	1.43523	1.15856	1	1	1.25029	1	1.23549	1	1
BOGNI_TREATMENT_RELATED_MYELOID_LEUKEMIA_DN_Up	1	1	1	1	1	1	1	1	1	1	1	1	1	1	1	1	1	1	1	1	1	1	1	1	1	1	1	1	1	1	1.09686	1	1	1	1	1.13894	1	1	1	1	1	1	1	1	1	1	1
BOGNI_TREATMENT_RELATED_MYELOID_LEUKEMIA_UP_Down	1	1	1	1	1	1	1	1	1	1	1	1	1	1	1	1	1	1	1	1	1	1	1	1	1	1	1	1	1	1	1	1	1	1	1	1	1	1	1	1	1	1	1	1	1	1.12614	1
BOGNI_TREATMENT_RELATED_MYELOID_LEUKEMIA_UP_Up	1	1	1	1	1	1	1	1	1	1	1	1	1	1	1	1	1	1	1	1	1	1	1	1	1.61925	1	1	1	1	1	1	1	1	1	1	1	1	1	1	1	1	1	1	1	1	1	1
BOHN_PRIMARY_IMMUNODEFICIENCY_SYNDROM_DN_Down	1	1	1.00797	1.23908	1	1.30648	1	1	1	1	1	1	1	1	1	1	1	1	1	1	1	1	1	1	1	1.11154	1	1	1.16057	1	1	1.09798	1	1	1.45874	1	1.07438	1	1	1	1.76958	1.16857	1.01278	1	1	1	1.21718
BOHN_PRIMARY_IMMUNODEFICIENCY_SYNDROM_DN_Up	1	1	1	1	1.05053	1	1.27225	1.86283	1	1.123	1	1	1	1	1	1.06936	1	1.3174	1	1.54816	1.45945	1	1	1	1.25079	1	1	1	1	1.12124	1	1	1	1	1	1	1	1.1683	1	1	1	1	1	1	1	1.44343	1
BOHN_PRIMARY_IMMUNODEFICIENCY_SYNDROM_UP_Down	1	1	1	1.83375	1	1.42427	1	1	1	1.89607	2.20443	1.72963	1	1.20788	1	1	1.09052	1	1	1	1	1	1	1	1	1.01317	1.67051	1.01283	1	1	1	1	1	1	1.22989	1	1	1.84466	1	1	1.34308	1.13098	1	1	1	1	1
BOHN_PRIMARY_IMMUNODEFICIENCY_SYNDROM_UP_Up	1	1	1	1	1	1	1	1	1	1	1	1	1.30882	1	1	1.20471	1	1	1	1	1	1	1	1	1.26127	1	1	1	1	1	1	1	1.02005	1	1	1.10319	1	1	1	1	1	1	1	1.33666	1	1.10868	1
BONCI_TARGETS_OF_MIR15A_AND_MIR16_1_Down	1	1	1	1.25415	1	1	1	1	1.50024	1.61475	1.30981	1.62446	1.85624	2.04165	2.00228	1.07329	1	1.30741	1	1	1	1.90666	1	1	1	1.14609	1	1	1.05155	1.6681	1	1.1143	1.03338	1.05169	1.10187	1	1	1.20292	1.17699	1	1.53543	1.14113	1	1	1	1	1.3759
BONCI_TARGETS_OF_MIR15A_AND_MIR16_1_Up	1	1	1.10984	1	1	1	1.31508	1	1	1	1	1	1	1	1	1	1	1	1	1.02075	1.00245	1	1	1.07815	1.00678	1	1	1	1	1	1.25127	1	1	1	1	1	1.48847	1	1	1.27479	1	1	1.10946	1.09279	1.05975	1.0489	1
BONOME_OVARIAN_CANCER_POOR_SURVIVAL_UP_Down	1	1	1	1	1	1	1	1.74809	2.06092	1.32016	1.11777	1.44492	2.24285	1.06383	1.77037	1	1	1	1.40213	1	1	1.17813	1	1	1.27003	1	1	1	1	1.77283	1	1	1.49117	1	1	1	1	1	1	1	1.46178	1	1	1	1	1	1.11627
BONOME_OVARIAN_CANCER_POOR_SURVIVAL_UP_Up	1	1	1.21537	1	1.56671	1	1.58941	1	1	1	1	1	1	1	1	1.24979	1	1.45658	1	1.58237	1.06526	1	1	1	1	1	1.10898	1	1.28076	1	1.35194	1.11644	1	1	1.72439	1.4692	1.4094	1	1	1.47507	1	1	1.22321	1	1	1	1
BONOME_OVARIAN_CANCER_SURVIVAL_OPTIMAL_DEBULKING_Down	1	1	1	1	1	1	1	1.10671	1	1	1	1	1	1	1	1	1	1	1	1	1	1	1.15847	1.18795	1	1.15631	1	1	1	1.55219	1	1.0708	1.04446	1	1	1	1	1	1	1	1	1	1	1	1	1	1
BONOME_OVARIAN_CANCER_SURVIVAL_OPTIMAL_DEBULKING_Up	1	1	1	1	1	1	1.01733	1	1	1.01138	1	1	1	1.02075	1.04443	1	1	1	1	1.41894	1.10779	1.01621	1	1	1	1	1	1.73716	1.71417	1	1.64761	1	1	1	1	1.22743	1	1.0569	1.2077	1	1	1	1	1.40726	1.25527	1.23061	1
BONOME_OVARIAN_CANCER_SURVIVAL_SUBOPTIMAL_DEBULKING_Down	1	1	1	1.1373	1	1.33514	1	1.30453	1.34382	1.05582	1	1.36349	1.4964	1.15182	1.46594	1	1	1	1.04612	1	1	1	1	1	1	1.27703	1	1	1	1.27755	1	1	1	1.07347	1	1	1	1	1	1	1.08378	1	1	1	1	1	1.52799
BONOME_OVARIAN_CANCER_SURVIVAL_SUBOPTIMAL_DEBULKING_Up	1	1	1	1	1	1	1.48523	1	1	1	1	1	1	1	1	1.04513	1	1.1956	1	1.38877	1.15048	1	1	1	1	1	1	1	1.05924	1	1.43702	1	1	1	1	1.37295	1.01888	1	1	1.00047	1	1	1	1.50268	1.14835	1	1
BOQUEST_STEM_CELL_CULTURED_VS_FRESH_UP_Down	1.45169	1.23558	1.64682	1	1	1.32631	1	1	1.68919	1	1.39845	1.21162	2.16848	1.58694	1.96029	1	1	1	1.21768	1	1	1	1	1.27859	1	1.11169	1	1	1	1.63599	1	1.36078	1	1.09298	1.68769	1.09443	1	1	1	1	1.84587	1	1.65106	1	1	1	1.4047
BOQUEST_STEM_CELL_CULTURED_VS_FRESH_UP_Up	1	1	1	1.72547	1.44588	1	2.02801	1.13744	1	1.36514	1	1	1	1	1	1.47546	1.61307	2.14269	1	2.09373	2.14996	1.34466	1	1	1.15347	1	1.37094	1	1.33058	1	1.74915	1	1.2079	1	1	1	1.32684	1.32858	1.6123	1.59233	1	1.1856	1	1.99198	1.63373	1.15711	1
BOQUEST_STEM_CELL_DN_Down	1.38356	1.30135	1.385	1	1	1.27207	1	1	1.61574	1	1.42425	1	1.16744	1	1.07262	1	1	1	1.21218	1	1	1	1.21465	1.38121	1.45644	1.64917	1	1.4806	1.13763	1	1	1	1.44461	1	1.08343	1	1.07185	1	1	1.84004	2.24871	2.27942	1.40582	1	1	1	1.08573
BOQUEST_STEM_CELL_DN_Up	1	1	1	1.65872	1.70677	1	1.82338	1.14413	1	1.20789	1	1	1	1	1	1.022	1.1412	1.34573	1	1.89916	1.99326	1.39927	1	1	1	1	1.28039	1	1	1	1.56519	1.00342	1	1	1	1	1	1.61998	1.75256	1	1	1	1	1.35462	1.34896	1.65908	1
BOQUEST_STEM_CELL_UP_Down	1.38155	1	1.61775	1.01099	1	1.44055	1	1.02807	2.13001	1	1.36909	1.68355	2.69671	1	1.368	1	1	1	1.29818	1	1	1	1.19863	1.48335	1	1.71695	1	1	1	1.58412	1	1	1.20998	1	2.36909	1	1.22481	1	1	1	1.32025	1	1.63455	1	1	1	2.21592
BOQUEST_STEM_CELL_UP_Up	1	1	1	1	1.44671	1	2.33207	1	1	1.80208	1	1	1	1.76247	1	1.92914	1.71327	2.32386	1	2.21892	2.4149	2.08827	1	1	1.45389	1	1.5177	1	1.8189	1	2.70165	1.27077	1	1.03857	1	1.17401	1	1.81674	1.20719	2.63589	1	2.02758	1	2.45905	1.98138	1.06949	1
BORCZUK_MALIGNANT_MESOTHELIOMA_DN_Down	1	1	1	1.19196	1	1.54302	1	1.52256	1.5332	1	1	1	1.22978	1	1	1	1.12017	1	1.27286	1	1	1	1.07801	1.00932	1.04909	1	1.0797	1.09229	1.03906	1.11776	1	1.39187	1	1.36105	1.43064	1.24459	1	1	1	1.17748	1	1	1	1	1	1	1
BORCZUK_MALIGNANT_MESOTHELIOMA_DN_Up	1	1.08106	1	1	1.46835	1	1.33195	1	1	1.01486	1	1.21943	1	1.23643	1	1.24427	1	1.18533	1	1.2632	1	1	1	1	1	1	1	1	1	1	1.00361	1	1	1	1	1	1	1.11473	1.59608	1	1.13521	1	1	1.313	1.24119	1.06982	1
BORCZUK_MALIGNANT_MESOTHELIOMA_UP_Down	1	1	1	1.51908	1	1	1	1	1	1	1.43227	1	1	1	1	1	1	1	1	1	1	1	1	1	1	1	1	1	1	1	1	1	1	1	1	1	1	1.39346	1	1	1	1	1	1	1	1	1
BORCZUK_MALIGNANT_MESOTHELIOMA_UP_Up	1	1	1	1	1	1	1	1.58087	1	1	1	1	1.46102	1.23595	1.43679	1	1	1	1	1.00137	1.03923	1.39239	1.20847	1.08286	1.4592	1	1	1.06223	1.53587	1	1	1	1	1	1	1	1.24501	1	1	1.26125	1	1.00495	1	1.04543	1	1	1
BORLAK_LIVER_CANCER_EGF_UP_Down	1.75322	1.31216	2.02997	1	1	1.05758	1	1	1.2487	1.1567	1.37107	1.65876	1	1	1	1	1	1	1.38857	1	1	1	1	1.06815	1	1.14528	1	1	1	1	1	1.51093	1	1.35189	2.11785	1.04338	1	1	1	1	1.18543	1.15739	2.05393	1	1	1	1
BORLAK_LIVER_CANCER_EGF_UP_Up	1	1	1	1.5133	1.29033	1	1.78953	1.84082	1	1	1	1	1.56205	1.62721	1.5752	1.37825	1.03106	1.6488	1	1.99208	1.8277	2.19743	1.12647	1	1.53012	1	1.51982	1.18705	1.52545	1	1.87028	1	1	1	1	1	1.01552	1.63063	1.47893	1.25867	1	1	1	1.66105	1	1	1
BOSCO_ALLERGEN_INDUCED_TH2_ASSOCIATED_MODULE_Down	1.17355	1	1.15935	1	1	1	1	1	1.10462	1	1	1.11796	1.70535	1	1.59424	1	1.11319	1	1.01275	1	1	1.02736	1	1	1	1	1.20377	1.10242	1.10404	1.02756	1.21963	1.18499	1	1.08932	1	1	1	1	1	1	1.3966	1.16929	1.14557	1	1	1	1.24862
BOSCO_ALLERGEN_INDUCED_TH2_ASSOCIATED_MODULE_Up	1	1	1	1.14706	1.26333	1	1.08347	1	1	1	1	1	1	1	1	1.67376	1	1.49935	1	1.34909	1.24812	1	1.1027	1.16936	1	1	1	1	1	1	1	1	1	1	1	1	1	1.9427	1.54371	1.02861	1	1	1	1.16511	1.44799	1.52273	1
BOSCO_EPITHELIAL_DIFFERENTIATION_MODULE_Down	1	1	1	1	1	1	1	1	1	1	1.25386	1	1	1	1	1	1	1	1	1	1	1	1.26342	1	1	1	1	1	1	1	1	1	1	1	1	1	1	1	1	1	1	1	1	1	1	1	1
BOSCO_EPITHELIAL_DIFFERENTIATION_MODULE_Up	1	1	1	1	1.89166	1	1.81283	1	1	1.15682	1	1	1	1.20753	1	1	1	1	1	1	1	1	1	1	1	1	1.63678	1	1	1	1	1	1	1	1	1	1	1	1	1	1	1	1	1.35867	1.77159	1.78247	1
BOSCO_INTERFERON_INDUCED_ANTIVIRAL_MODULE_Down	1	1.04691	1	1	1	1.55129	1	1.13761	1.74464	1.28836	1.66633	1	1.1081	1	1	1	1	1	1.12657	1	1	1	1.17305	1	1	1.02491	1.34421	1	1	1.25538	1	1	1	1	1	1	1	1	1	1	2.40783	1.81162	1	1	1	1	1
BOSCO_INTERFERON_INDUCED_ANTIVIRAL_MODULE_Up	1	1	1	1.61752	1.69265	1	1.33532	1	1	1	1	1	1	1.3122	1	1.89979	1	1.81938	1	1.63272	1.2275	1.1484	1	1	1	1	1	1	1	1	1	1.08079	1.01317	1	1	1	1.14292	1.8876	1	1	1	1	1	1.61645	1.52909	1.70878	1.14471
BOSCO_TH1_CYTOTOXIC_MODULE_Down	1	1	1.4176	1	1	1.16848	1	1.19298	1.6955	1.23668	1.98608	1.1561	1.52542	1.14172	1.20143	1.06626	1	1	1.43723	1	1	1.01792	1.02286	1	1	1	1	1	1	1.16036	1	1	1	1.18235	1.18022	1	1	1	1	1	2.11127	1.51721	1.40566	1	1	1	1
BOSCO_TH1_CYTOTOXIC_MODULE_Up	1	1	1	1	1.70076	1	1.52331	1	1	1	1	1	1	1	1	1	1.12468	1.2378	1	1.46083	1	1	1	1	1.27502	1.02234	1.02979	1	1.01773	1	1	1.45091	1.13352	1	1	1.0097	1.2221	1.23253	1.50419	1.29844	1	1	1	1.0004	1.08299	1.36903	1.19979
BOUDOUKHA_BOUND_BY_IGF2BP2_Down	1.16395	1	1.46843	1	1	1	1	1	1	1	1.33009	1	1	1	1	1	1	1	1.33746	1	1.18869	1	1	1	1	1	1	1	1	1	1	1	1	1	1	1	1	1	1	1	1	1	1.43116	1	1	1	1
BOUDOUKHA_BOUND_BY_IGF2BP2_Up	1	1	1	1	1	1.11954	1.47138	1.47736	1.02978	1.3766	1	1.15733	2.20932	1.92163	2.30645	1.05994	1	1	1	1	1	1.90236	1	1.15129	1.19663	1	1.05466	1	1	1	1	1	1	1	1.29065	1	1.04701	1.17243	1	1	1.69383	1.60941	1	1.21873	1	1	1
BOYAULT_LIVER_CANCER_SUBCLASS_G1_DN_Down	1.51837	1.39122	1.34445	1	1	1.22262	1	1	1.14803	1	1	1	1.16657	1	1	1	1	1	1.01967	1	1.17991	1.08969	1	1.18159	1.06467	1	1	1.17658	1	1	1	1	1.01026	1	1	1	1	1	1	1	1.61694	1.4562	1.38195	1	1	1	1
BOYAULT_LIVER_CANCER_SUBCLASS_G1_DN_Up	1	1	1	1	1	1	1.24071	1	1	1.50898	1	1.85232	1	1.04315	1	1.00003	1	1	1	1	1	1	1.18829	1	1	1	1	1	1	1	1	1.34337	1	1	1	1.11206	1.09012	1	1	1	1	1	1	1	1	1.23514	1
BOYAULT_LIVER_CANCER_SUBCLASS_G1_UP_Down	1	1	1	1.33236	1	1.21694	1	1.48803	1	1.54357	1	1.71982	1.09398	1.66477	1.45713	1	1	1	1.25091	1	1	1.21654	1	1	1	1.11203	1.0666	1.08833	1	1.64583	1	1	1.32649	1.09124	1	1	1	1	1	1	1.54481	1.22941	1	1	1	1.02375	1.47076
BOYAULT_LIVER_CANCER_SUBCLASS_G1_UP_Up	1	1	1	1	1	1	1.27945	1	1	1	1	1	1	1	1	1	1	1	1	1.45147	1.01721	1	1	1	1	1	1	1	1	1	1.30317	1	1	1	1.36985	1.30858	1	1	1	1	1	1	1	1	1	1	1
BOYAULT_LIVER_CANCER_SUBCLASS_G12_UP_Down	1	1	1	1	1	1	1	1	1	1	1.34564	1	1	1.51486	1.31361	1	1	1	1	1	1	1.21555	1	1	1	1	1	1	1	1	1	1	1	1	1	1	1	1.11513	1	1	1	1	1	1	1	1	1
BOYAULT_LIVER_CANCER_SUBCLASS_G12_UP_Up	1.21619	1.04075	1	1	1	1	1	1	1	1	1	1	1	1	1	1	1	1	1	1	1	1	1	1	1	1.03626	1.00865	1	1	1	1.08546	1.06128	1	1	1	1	1	1	1	1	1	1	1	1	1	1	1
BOYAULT_LIVER_CANCER_SUBCLASS_G123_DN_Down	1.52258	1.16106	1.54621	1	1	1	1	1	1	1	1	1	1	1	1	1	1	1	1.2459	1	1	1	1.25654	1.12639	1.35831	1	1	1.144	1	1	1	1.16538	1	1	1.5459	1	1	1	1	1	1	1	1.56368	1	1	1	1
BOYAULT_LIVER_CANCER_SUBCLASS_G123_DN_Up	1	1	1	1	1.51878	1	1	1	1	1.35453	1	1.05004	1	1.43031	1	1.32487	1	1.60129	1	1.3313	1.12116	1.04966	1	1	1	1.20101	1.21778	1	1	1	1	1	1	1	1	1	1.02829	1	1.46011	1	1	1	1	1	1	1.21188	1
BOYAULT_LIVER_CANCER_SUBCLASS_G123_UP_Down	1	1	1	1.29895	1.6023	1.05204	1	1	1	1.77259	1.69887	1.45082	1	1	1	1	1	1.07985	1	1	1	1	1	1	1	1	1	1	1	1.24194	1	1	1	1	1	1	1	1.43646	2.02455	1	1	1	1	1	1	1	1
BOYAULT_LIVER_CANCER_SUBCLASS_G123_UP_Up	1	1	1.00953	1	1	1	1	1	1	1	1	1	1.26324	1	1	1	1	1	1	1.16702	1.01734	1.03991	1	1.07384	1.1095	1	1	1.09152	1.27133	1	1	1	1	1	1	1	1.27002	1	1	1	1	1	1.02524	1	1	1.05997	1
BOYAULT_LIVER_CANCER_SUBCLASS_G2_Down	1	1	1	1.00796	1	1.01508	1	1	1	1	1	1	1	1.35666	1.29686	1.2347	1	1.16787	1.34649	1	1.05728	1.25231	1	1	1	1	1	1	1	1	1	1	1	1	1	1.40441	1	1	1	1	1.17684	1	1	1	1	1	1
BOYAULT_LIVER_CANCER_SUBCLASS_G2_Up	1	1.05872	1	1	1	1	1.12641	1	1	1	1	1.32164	1	1	1	1	1.08082	1	1	1	1	1	1	1	1	1	1	1	1	1	1	1	1.47225	1	1	1	1	1	1	1.08878	1	1	1	1	1	1	1
BOYAULT_LIVER_CANCER_SUBCLASS_G23_UP_Down	1	1	1	2.18223	2.19703	1.37356	1	1	1.29595	1.8321	1.91977	1.78507	1	1.266	1	1	1	1	1	1	1	1	1	1	1	1.06748	1.21603	1	1	1	1	1	1	1	1	1.2072	1.37826	1.336	1.46437	1	1.61633	1.16928	1	1	1	1	1
BOYAULT_LIVER_CANCER_SUBCLASS_G23_UP_Up	1.43958	1.24952	1.51871	1	1	1	1	1	1	1	1	1	1.02594	1	1	1	1	1	1.56439	1	1.31975	1	1	1.3047	1.83442	1	1	1.17372	1.42438	1.12443	1.26573	1	1.37622	1	1	1	1	1	1	1	1	1	1.47658	1	1	1.23765	1
BOYAULT_LIVER_CANCER_SUBCLASS_G3_DN_Down	1.35712	1.17507	1.24518	1	1	1.00257	1	1	1	1	1	1.45803	1	1	1	1	1.31643	1	1.23212	1	1	1	1	1.07025	1	1	1	1	1.08392	1.44023	1	1.12014	1	1.57583	1.40845	1	1.34903	1	1	1.32827	1	1.09406	1.27144	1	1	1	1.54341
BOYAULT_LIVER_CANCER_SUBCLASS_G3_DN_Up	1	1	1	1	1.04656	1	1.55896	1	1.01726	1.36806	1	1	1	1.36392	1	1.71078	1	1.35892	1	1.44547	1.02098	1.15275	1	1	1	1	1.272	1	1	1	1.61358	1	1	1	1	1	1	1	1	1	1	1	1	1.43527	1.13136	1	1
BOYAULT_LIVER_CANCER_SUBCLASS_G3_UP_Down	1	1	1	1.79048	1	1	1	1	1	1.46781	1.88027	1.1873	1	1	1	1	1	1	1	1	1	1	1	1	1	1	1	1	1	1	1	1	1	1	1	1.29381	1	1.3049	1.36939	1	1	1	1	1	1	1	1
BOYAULT_LIVER_CANCER_SUBCLASS_G3_UP_Up	1	1	1	1	1	1	1	1.0968	1	1	1	1	1.37879	1	1.02046	1	1	1	1	1	1	1	1.15064	1	1.53004	1	1	1.0181	1.14021	1.41925	1	1	1	1.02747	1	1	1	1	1	1	1	1	1	1	1	1.00375	1
BOYAULT_LIVER_CANCER_SUBCLASS_G5_DN_Down	1	1	1	1	1	1	1	1	1	1	1	1	1	1	1	1	1	1	1	1	1	1	1	1	1	1	1	1	1	1	1	1	1	1	1	1	1	1	1	1	1.97815	1	1	1	1	1	1
BOYAULT_LIVER_CANCER_SUBCLASS_G6_UP_Down	1.32625	1.60859	1	1	1	1	1	1	1	1	1.11957	1	1	1	1	1	1	1	1.37004	1	1	1	1.08156	1	1.21432	1.57176	1	1.2332	1	1	1	1	1	1	1	1.00937	1	1	1	1	1.04455	1	1	1	1	1	1
BOYAULT_LIVER_CANCER_SUBCLASS_G6_UP_Up	1	1	1	1	1.19025	1.27164	1.27779	1	1	1.13981	1	1.08359	1	1.42931	1.16014	1.18192	1	1.1615	1	1.12196	1	1.13442	1	1	1	1	1	1	1.44096	1	1	1	1.01232	1	1	1	1	1.36887	1.21449	1	1	1	1	1.08378	1.36254	1.04018	1
BOYLAN_MULTIPLE_MYELOMA_C_CLUSTER_DN_Down	1	1	1	1	1	1	1	1	1	1	1	1	1	1	1	1	1	1	1	1	1	1.01152	1	1	1	1	1	1	1.11084	1	1	1	1	1	1	1	1	1	1	1	1	1	1	1	1	1	1
BOYLAN_MULTIPLE_MYELOMA_C_CLUSTER_DN_Up	1	1	1	1	1.53073	1	1	1	1	1	1	1	1	1	1	1.20316	1	1.22545	1	1	1	1	1	1	1	1	1	1	1	1	1	1	1	1	1	1	1	1	1	1	1	1	1	1	1	1.30891	1
BOYLAN_MULTIPLE_MYELOMA_C_CLUSTER_UP_Down	1	1	1	2.07314	1.53708	1.73547	1	1	1	1.26137	1	1.72777	1	1	1	1	1	1	1	1	1	1	1	1.13158	1	1.34397	1.05957	1	1	1.55144	1.43231	1.86245	1	1	1.37327	1	1	1.7604	1	1	1	1	1	1.09247	1	1	1
BOYLAN_MULTIPLE_MYELOMA_C_CLUSTER_UP_Up	1.10233	1.06947	1.09012	1	1	1	1.27618	1.21957	1	1	1	1	1	1	1	1	1	1.16375	1	1.01388	1.15287	1	1	1	1.86829	1	1	1	1	1	1	1	1	1	1	1	1	1	1	1	1	1	1.10255	1	1.05804	1.27067	1
BOYLAN_MULTIPLE_MYELOMA_C_D_DN_Down	1.06305	1.07191	1.21651	1	1	1.04781	1	1	1.70784	1	1	1	1.88223	1.09424	1.5764	1	1	1	1.72156	1	1.16086	1.05285	1.39841	1	1	1.1951	1	1	1	1.45412	1	1.3776	1	1.19591	1	1	1	1	1	1	1.99087	1.20633	1.23192	1	1	1	1.32994
BOYLAN_MULTIPLE_MYELOMA_C_D_DN_Up	1	1	1	1.89334	1.64885	1	1.83927	1	1	1.38866	1.03285	1.38541	1	1	1	1.32393	1.17944	1.68468	1	1.67945	1	1	1	1	1	1	1	1	1.16947	1	1.02967	1	1.14615	1	1.05418	1.21677	1.03112	1.83617	1.44959	1.69891	1	1	1	1.74145	1.4799	1.51956	1
BOYLAN_MULTIPLE_MYELOMA_C_D_UP_Down	1	1	1	1	1	1.55576	1	1	1	1.11634	1.41411	1.19182	1.05087	1.29377	1.13501	1.06313	1	1	1	1	1	1	1	1	1	1	1	1	1.22027	1	1	1	1	1	1	1	1	1.90477	1	1	1	1	1	1	1	1	1.16729
BOYLAN_MULTIPLE_MYELOMA_C_D_UP_Up	1	1	1	1	1	1	1.114	1.10846	1	1	1	1	1	1	1	1	1	1	1.03168	1	1	1	1.199	1	1.42472	1	1	1	1	1	1	1	1	1.09896	1	1	1	1	1	1	1	1	1	1	1	1.04826	1
BOYLAN_MULTIPLE_MYELOMA_C_DN_Down	1.7911	1.76574	1.67971	1	1	1.40177	1	1.50359	1.09816	1.08656	1	1	1.38935	1.11102	1.49909	1	1	1	1	1	1	1.22921	1	1	1	1	1.03965	1	1.16105	1.59335	1	1.07166	1.00374	1.3502	1	1	1	1	1.18104	1.31572	1.48403	1.57208	1.72206	1	1	1	1.23818
BOYLAN_MULTIPLE_MYELOMA_C_DN_Up	1	1	1	1.03148	1.37898	1	1	1	1	1	1	1	1	1	1	1	1	1	1	1.42792	1.09937	1	1	1	1	1	1	1	1	1	1	1	1	1	1	1.3344	1.17383	1.33799	1	1	1	1	1	1	1.17976	1.11955	1
BOYLAN_MULTIPLE_MYELOMA_C_UP_Down	1	1	1	1	1	1.47882	1	1	1	1.07307	1	1.72109	1	1	1	1	1	1	1	1	1	1	1	1.26233	1	1.56459	1.31237	1.14932	1	1.40324	1.19343	1.62777	1	1.44116	1	1	1.3591	1.54688	1	1	1.22853	1.23757	1	1	1.01296	1	1
BOYLAN_MULTIPLE_MYELOMA_C_UP_Up	1	1	1	1	1	1	1.22298	1	1	1	1	1	1	1	1	1.1154	1	1.45043	1.0285	1	1.02687	1.18103	1	1	1	1	1	1	1	1	1	1	1	1	1	1	1	1	1	1	1	1	1	1	1	1	1
BOYLAN_MULTIPLE_MYELOMA_D_CLUSTER_DN_Down	1	1	1	1	1	1.16113	1	1	1	1	1	1	1	1	1	1	1	1	1.1296	1	1.11381	1.00385	1.6992	1.04718	1	1	1	1.31273	1.11526	1.54258	1	1	1	1.18627	1	1	1	1	1	1	1	1	1	1	1	1	1
BOYLAN_MULTIPLE_MYELOMA_D_CLUSTER_DN_Up	1	1	1	1.33542	1.04327	1	1.58616	1	1	1.09632	1.00853	1	1	1	1	1	1	1	1	1	1	1	1	1	1.30136	1	1	1	1	1	1.14285	1	1	1	1.35986	1.56596	1	1.79617	1.40585	1.23861	1	1.41694	1	1.35992	1.21836	1.02579	1.03658
BOYLAN_MULTIPLE_MYELOMA_D_CLUSTER_UP_Down	1	1	1	1	1.34487	1	1	1	1	1	1.22733	1	1	1	1	1.19946	1	1	1.28202	1	1.48605	1.31924	1	1	1.11101	1	1	1.29474	1	1.38918	1	1.24791	1	1.0031	1.25115	1	1	1	1	1	1	1	1	1	1	1	1
BOYLAN_MULTIPLE_MYELOMA_D_CLUSTER_UP_Up	1	1	1.16523	1	1	1.23647	1	1	1	1	1	1	1.05332	1	1.01443	1	1.01198	1	1	1	1	1	1	1	1	1	1	1	1.22217	1	1.16677	1	1.28421	1	1	1	1	1	1	1.39932	1	1.33838	1.20342	1.13586	1.00671	1	1
BOYLAN_MULTIPLE_MYELOMA_D_DN_Down	1.06535	1.03036	1	1	1	1.34385	2.3062	1	1	1	1	1	1.01834	1	1	1	1	1	1.38622	1	1.41713	1	1.755	1.34687	1.02754	1.14976	1	1.47562	1.26617	1.62464	1	1	1	1	1	1	1	1	1	1	1	1	1	1	1	1	1
BOYLAN_MULTIPLE_MYELOMA_D_DN_Up	1	1	1	1.17626	1.21495	1	1	1.0363	1.46342	1.61234	2.81011	1.2699	1	1.28136	1.07263	1	1	1.00511	1	1	1	1	1	1	1	1	1.26896	1	1	1	1.2133	1	1.24402	1	1.25571	1.10301	1	1.54597	1.72536	1	1.32405	1.08859	1	1.38576	1.34161	1.4677	1
BOYLAN_MULTIPLE_MYELOMA_D_UP_Down	1	1	1	1	1	1	1	1	1	1	1	1	1	1.00106	1	1.25302	1	1	1	1	1	1	1	1	1	1	1	1	1	1.00441	1	1	1	1	1	1	1	1.24551	1	1	1	1	1	1	1	1	1.26719
BOYLAN_MULTIPLE_MYELOMA_D_UP_Up	1	1.11758	1	1	1	1.03742	1.44585	1	1	1	1	1	1	1	1	1	1.20907	1	1	1.45236	1.32685	1	1.42644	1	1	1.25801	1	1	1.16734	1	1.31721	1	1	1	1	1.15097	1.14991	1	1.31344	1.44077	1	1.14124	1	1.36959	1	1.03626	1
BOYLAN_MULTIPLE_MYELOMA_PCA1_UP_Down	1	1.15557	1	1	1	1.04352	1.93395	1	1.28928	1	1	1	1.5806	1	1.33952	1	1	1	1.69077	1	1	1	1.07847	1.30066	1.29344	1.47507	1.05052	1.28624	1	1.66604	1.28352	1.30948	1.66403	1.06446	1	1	1	1	1	1	2.07944	1.29979	1	1	1	1	1.01633
BOYLAN_MULTIPLE_MYELOMA_PCA1_UP_Up	1	1	1	1.84995	1.71479	1	1	1	1	1.06688	2.28748	1.90895	1	1	1	1	1.41735	1.43872	1	1.84349	1.26742	1	1	1	1	1	1	1	1.13944	1	1	1	1	1	1	1.55559	1.11604	1.22581	1.65428	1.7863	1	1	1	1.46162	1.16505	1.44484	1
BOYLAN_MULTIPLE_MYELOMA_PCA3_DN_Down	1	1	1	1	1	1.20179	2.17705	1	1	1	1	1	1.30264	1	1.152	1	1	1	1.37263	1	1.39455	1.09769	1.13738	1.16309	1	1.43664	1	1.24616	1	1.68419	1	1	1	1	1	1	1.27624	1	1	1	1.28936	1	1	1	1	1	1.01078
BOYLAN_MULTIPLE_MYELOMA_PCA3_DN_Up	1	1	1	1.00632	1	1	1	1.22157	1	1	2.49992	1	1	1.1163	1	1.1327	1	1.26558	1	1	1	1	1	1	1	1	1	1	1	1	1.29291	1	1.3685	1	1.00466	1.4005	1	1.73831	1.53469	1	1	1	1	1.12826	1.45	1.07362	1
BOYLAN_MULTIPLE_MYELOMA_PCA3_UP_Down	1.43104	1.16261	1.4168	1	1	1	1	1.32249	1	1	1	1.04422	1.11189	1.35106	1.31248	1.65541	1	1.25612	1	1	1	1.55243	1.27338	1.07865	1.87822	1	1.18027	1.5136	1	1	1	1	1	1	1	1.07002	1	1	1	1	1.64739	1.48762	1.44126	1	1	1	1.46218
BOYLAN_MULTIPLE_MYELOMA_PCA3_UP_Up	1	1	1	1	1.19422	1	1.08389	1	1.02384	1	1	1	1	1	1	1	1.35499	1	1	1.30511	1.25725	1	1	1	1	1	1	1	1.06427	1	1.32179	1	1	1	1.10252	1	1.19623	1.17631	1.59386	1.00513	1	1	1	1	1.18766	1.35853	1
BRACHAT_RESPONSE_TO_CAMPTOTHECIN_DN_Down	1	1	1.31058	1.06336	1	1	1	1	1	1	1.07923	1	1	1	1	1	1	1	1	1	1	1	1	1	1	1	1	1	1	1	1	1	1	1.00176	1	1	1	1.41238	1	1.15008	1	1	1.30789	1	1	1	1.08405
BRACHAT_RESPONSE_TO_CAMPTOTHECIN_DN_Up	1	1	1	1	1	1	1.16704	1.19908	1	1	1	1.27148	1.88236	2.08954	2.15393	1.11281	1	1	1	1.07569	1	1.77379	1	1	1	1	1.0702	1	1	1.02011	1	1	1.47379	1	1	1	1	1	1	1	1	1	1	1	1	1.01891	1
BRACHAT_RESPONSE_TO_CAMPTOTHECIN_UP_Down	1	1	1	1.33101	1	1.34514	1	1	1.08715	1	1	1	1	1	1	1	1.02775	1	1.04665	1	1	1	1	1	1	1	1.13867	1.53042	1	1.12042	1	1	1.00071	1	1	1	1	1	1	1	1	1.26553	1	1	1.11831	1	1
BRACHAT_RESPONSE_TO_CAMPTOTHECIN_UP_Up	1	1	1	1	1	1	1	1.56272	1	1.25972	1.08977	1.6919	1	1	1	1	1	1.00765	1	1	1	1.37517	1	1	1	1	1	1	1	1	1	1	1	1	1	1	1	1	1	1	1	1	1	1	1	1	1
BREDEMEYER_RAG_SIGNALING_NOT_VIA_ATM_DN_Down	1	1	1	1	1	1	1	1.16314	1.04859	1	1.1708	1	1	1.58239	1.25828	1	1	1	1	1.48646	1.22245	1	1.0944	1	1	1	1	1	1	1.12788	1	1	1	1.6072	1	1	1	1	1	1	1	1	1	1	1	1	1.62159
BREDEMEYER_RAG_SIGNALING_NOT_VIA_ATM_DN_Up	1	1	1	1	1	1	1.02457	1	1	1	1	1	1	1	1	1.07947	1.05211	1.29866	1	1	1	1	1	1	1	1	1	1	1	1	1	1	1	1	1.5247	1.04561	1	1.20143	1.05427	1.14512	1	1	1	1.30053	1.25794	1	1
BREDEMEYER_RAG_SIGNALING_NOT_VIA_ATM_UP_Down	1.19323	1.01958	1.04428	1	1	1.34374	1	1	1.2894	1	1	1	1	1	1	1	1	1	1	1	1	1	1.03236	1.26606	1	1	1	1	1	1	1	1.40049	1	1	1.15692	1	1.86939	1	1	1	1.12896	1	1.04158	1	1	1	1.44356
BREDEMEYER_RAG_SIGNALING_NOT_VIA_ATM_UP_Up	1	1	1	1.22236	1	1	1.38029	1.00817	1	1.05088	1	1.62329	1	1	1	1	1.17876	1.26117	1	1.04282	1	1	1	1	1	1	1	2.59727	2.36893	1	1	1	1	1.08478	1	1	1	1	1	1	1	1	1	1	1	1	1
BREDEMEYER_RAG_SIGNALING_VIA_ATM_NOT_VIA_NFKB_DN_Down	1.29489	1.47	1.1912	1	1	1.20808	1	1.43098	1	1	1	1	1.35916	1	1	1	1	1	1.02567	1	1	1	1	1.3751	1.0501	1	1	1	1	1.53408	1	1	1	1	1	1	1	1	1	1	1	1	1.17396	1	1	1	1
BREDEMEYER_RAG_SIGNALING_VIA_ATM_NOT_VIA_NFKB_DN_Up	1	1	1	1	1	1	1.3947	1	1.00253	1.19666	1	1	1	1	1	1.3373	1	1.36993	1	1.51591	1.17495	1	1.21025	1	1	1.00194	1.14781	1.02019	1.28109	1	1	1	1.0043	1	1	1.52246	1	1	1.15824	1.01125	1	1.24207	1	1	1	1	1
BREDEMEYER_RAG_SIGNALING_VIA_ATM_NOT_VIA_NFKB_UP_Down	1	1	1.24179	1	1	1.23884	1	1.29359	1	1.23653	1.24298	1.43648	1	1	1	1	1	1	1.11358	1	1	1	1.02748	1	1	1	1	1	1	1	1	1	1	1	1	1	1	1	1	1	1	1	1.20252	1	1	1	1.12966
BREDEMEYER_RAG_SIGNALING_VIA_ATM_NOT_VIA_NFKB_UP_Up	1	1	1	1	1.15568	1	1.37116	1	1	1	1	1	1	1.25599	1	1	1	1.33571	1	1.36265	1	1.2107	1	1	1.12317	1	1.21015	1.03404	1.26679	1	1.33616	1	1.34382	1	1	1	1	1.03043	1.20916	1	1	1	1	1.10053	1	1	1
BREUHAHN_GROWTH_FACTOR_SIGNALING_IN_LIVER_CANCER_Down	1	1	1	1	1	1	1	1	1	1	1.00697	1.26314	2.01148	1.95999	2.19448	1	1.00391	1	1.31335	1	1	1.9708	1	1	1	1	1	1	1	1	1	1	1	1	1	1	1	1	1	1	1.39504	1	1	1	1	1	1
BREUHAHN_GROWTH_FACTOR_SIGNALING_IN_LIVER_CANCER_Up	1	1	1	1	1	1	1.70292	1.10007	1	1.10408	1	1	1	1	1	1.11228	1	1.22543	1	1.51306	1.02405	1	1.34544	1	1.10115	1	1.2809	1.08075	1	1	1	1.2247	1	1	1	1	1.46253	1	1	1	1	1	1	1.49632	1.14299	1	1
BRIDEAU_IMPRINTED_GENES_Down	1	1.03165	1	1	1	1.99723	1.43446	1.03426	1	1.12313	1.07002	1.38593	1.05281	1	1	1	1	1	1.32579	1	1.00108	1	1	1	1	1.22865	1	1	1	1.35191	1	1.04581	1	1.2313	1.08479	1	1	1	1	1	1.95468	1.77888	1	1	1	1.4503	1.64391
BRIDEAU_IMPRINTED_GENES_Up	1	1	1.13814	1	1.20198	1	1	1	1.73207	1	1	1	1	1.93743	1.38124	1.02351	1	1.3663	1	1.31379	1	1.9014	1.04917	1	1	1	1	1	1.57841	1	1.24745	1	1	1	1	1	1.22152	1	1	1.05575	1	1	1.11456	1.32695	1	1	1
BROCKE_APOPTOSIS_REVERSED_BY_IL6_Down	1.23167	1	1.49718	1	1	1.49005	1	1	1.3322	1	1	1	1	1	1	1	1.02106	1	1	1	1	1	1	1	1	1	1	1	1	1	1	1	1	1	1.47821	1	1	1	1	1	1.58866	1.29729	1.48704	1	1	1	1.23566
BROCKE_APOPTOSIS_REVERSED_BY_IL6_Up	1	1	1	1.07192	1.13282	1	1.2821	1.4708	1	1.49238	1	1.40147	1	1	1	1.23749	1	1.15281	1	1.20988	1.2663	1	1	1	1.5698	1	1.39226	1	1	1	1.12623	1	1.07289	1	1	1	1	1.63605	1.10555	1.01462	1	1	1	1.45419	1.23032	1	1
BROWN_MYELOID_CELL_DEVELOPMENT_DN_Down	1	1	1	1.195	1	1	1	1	1.21561	1.1305	1.39912	1.18061	1	1	1	1.13983	1	1	1	1	1	1	1	1	1	1	1	1	1	1.33638	1.09922	1	1.26335	1	1	1	1	1.83647	1	1	1.22881	1	1	1	1	1	1.18983
BROWN_MYELOID_CELL_DEVELOPMENT_DN_Up	1	1	1	1	1	1	1	1	1	1	1	1	1.14371	1	1	1	1.10838	1	1	1	1	1	1	1	1	1	1	1	1	1	1	1	1	1.16819	1	1	1.37589	1	1	1	1	1	1	1.13298	1.06994	1	1
BROWN_MYELOID_CELL_DEVELOPMENT_UP_Down	1.41506	1.24293	1.61125	1	1	1	1	1	1.2976	1	1	1	1	1	1	1	1	1	1.36488	1	1	1	1.03698	1.42019	1	1.43269	1	1.40869	1	1	1	1	1	1.15888	1.25763	1	1.131	1	1	1	1	1	1.64904	1	1	1	1
BROWN_MYELOID_CELL_DEVELOPMENT_UP_Up	1	1	1	1.79836	1.58305	1.56921	1.77315	1.82101	1	1.78249	1.34022	1.9585	1	1.6237	1.29073	1.1629	1.29391	1.51855	1	1.69544	1.35332	1.40936	1	1	1.04554	1	1.35827	1	1.11117	1.25442	1.42803	1	1.38679	1	1	1	1	2.64347	1.27688	1.28764	1	1.09541	1	1.91022	1.605	1.62036	1
BROWNE_HCMV_INFECTION_10HR_DN_Down	1	1	1	1.0386	1	1.29424	1	1.58934	1.30251	1.17947	1.36477	1	1.12943	1.38542	1.14693	1	1	1	1.21079	1	1	1.01364	1.25948	1	1	1.12492	1	1	1	1.3368	1	1	1	1	1	1	1	1	1.00053	1	1.68752	1.16245	1	1	1	1	1.48511
BROWNE_HCMV_INFECTION_10HR_DN_Up	1	1	1	1	1.02334	1	1.62399	1	1	1	1	1.21175	1	1	1	1.04126	1	1.28054	1	1.11736	1	1	1	1.39221	1	1	1	1	1	1	1.11302	1.04499	1	1	1.20041	1.33003	1.06033	1	1	1.51564	1	1	1	1.40742	1.28889	1	1
BROWNE_HCMV_INFECTION_10HR_UP_Down	1.21959	1.3819	1	1	1.1872	1	1	1.2204	1.06568	1	1	1	1	1.11003	1.04514	1	1	1	1	1	1	1	1	1	1	1	1	1	1	1.57668	1	1	1.27264	1	1.31306	1	1	1	1	1	1.30334	1	1	1	1	1	1
BROWNE_HCMV_INFECTION_10HR_UP_Up	1	1	1	1	1	1	1	1	1	1	1	1.27859	1	1	1	1.05249	1	1.13371	1	1.22993	1	1	1.16896	1	1	1	1	1.11345	1	1	1.18497	1	1	1	1	1	1.0014	1.0537	1	1	1	1	1	1	1	1	1
BROWNE_HCMV_INFECTION_12HR_DN_Down	1	1	1	1.04628	1	1	1	1.40864	1	1.07688	1.28809	1.01839	1.68992	1.68318	1.8179	1	1	1	1	1	1	1.16507	1	1	1.01393	1.18976	1	1	1.12282	1.54798	1	1	1	1	1	1	1	1	1.02684	1	1.66983	1	1	1	1	1	1.68225
BROWNE_HCMV_INFECTION_12HR_DN_Up	1	1	1	1	1	1	1.70489	1	1	1	1	1	1	1	1	1	1.09896	1.21684	1	1.32265	1.08241	1	1	1	1	1	1	1	1	1	1.23625	1	1	1	1.14901	1	1.26496	1	1	1.59232	1	1.02191	1	1.51873	1.43874	1	1
BROWNE_HCMV_INFECTION_12HR_UP_Down	1	1	1	1.57679	1	1.45972	1	1	1.33439	1	1	1	1.13836	1.09877	1.13841	1	1.05954	1	1	1	1	1.10351	1	1	1	1	1.30081	1	1.1806	1.13877	1	1.35282	1	1.56238	1.4989	1	1	1	1.02845	1	1.46774	1.16441	1	1	1	1	1
BROWNE_HCMV_INFECTION_12HR_UP_Up	1	1	1	1	1	1	1	1	1	1	1	1.17749	1	1	1	1	1	1	1	1.11325	1.04492	1	1.06735	1	1	1	1	1	1	1	1	1	1	1	1	1.2141	1.21956	1.19648	1	1	1	1	1	1	1	1	1
BROWNE_HCMV_INFECTION_14HR_DN_Down	1	1	1	1.39961	1	1.54649	1	1.24874	1	1.03277	1.1909	1.11329	1.4449	1.17097	1.25143	1	1	1	1.06232	1	1	1	1	1	1	1	1	1	1	1.61199	1	1.15171	1	1	1	1	1	1	1	1	1.27198	1	1	1	1	1	1.31697
BROWNE_HCMV_INFECTION_14HR_DN_Up	1.06877	1.1043	1	1	1.02716	1	1.62089	1	1	1	1	1	1	1	1	1.1431	1	1.04685	1	1.40119	1.22781	1	1	1	1	1	1.00899	1	1.16203	1	1.08939	1	1.15064	1	1	1.10863	1	1	1.25998	1.02945	1	1	1	1.53109	1.35062	1	1
BROWNE_HCMV_INFECTION_14HR_UP_Down	1	1	1.1578	1.67845	1.34917	1.58499	1.60013	1	1.04123	1.23385	1	1	1	1	1	1	1	1	1	1	1	1	1	1	1	1	1.24442	1	1	1.03034	1	1	1.07007	1	1.05507	1	1	1.11446	1	1	1	1	1.16422	1	1	1	1
BROWNE_HCMV_INFECTION_14HR_UP_Up	1	1	1	1	1	1	1	1	1	1	1.77495	1	1	1	1	1	1.002	1	1	1	1	1	1	1	1.36709	1	1	1	1	1	1	1	1	1	1	1	1.15124	1	1	1	1	1	1	1.01641	1	1	1
BROWNE_HCMV_INFECTION_16HR_DN_Down	1	1	1	1	1	1.15814	1	1	1.37071	1	1.05931	1	1.70963	1	1.26893	1	1	1	1	1	1	1	1	1.02237	1	1.39559	1	1	1	1.40653	1	1	1.42751	1	1.38429	1	1	1	1	1	1.31895	1	1	1	1	1	1.78421
BROWNE_HCMV_INFECTION_16HR_DN_Up	1	1	1	1.16199	1.34739	1	1.91842	1	1	1	1	1	1	1	1	1.26974	1.16439	1.51508	1.06723	2.03932	2.1485	1.60076	1	1	1.08346	1	1	1	1.47339	1	1.66774	1	1	1	1	1.11166	1	1.34201	1	1.35452	1	1	1	1.70142	1.39025	1.0197	1
BROWNE_HCMV_INFECTION_16HR_UP_Down	1	1.1261	1	1.32877	1	1.14872	1	1	1	1.03987	1	1	1.36199	1.29978	1.51987	1	1.03653	1	1	1	1	1.35617	1	1	1	1	1.27319	1	1	1.22845	1.352	1	1	1	1	1	1	1.17552	1.27266	1	1.60344	1.21985	1	1	1	1	1
BROWNE_HCMV_INFECTION_16HR_UP_Up	1	1	1	1	1	1	1	1	1	1	1	1.04447	1	1	1	1	1	1	1	1	1	1	1	1	1	1	1	1	1	1	1	1	1.02086	1	1	1.02958	1.23524	1	1	1	1	1	1	1	1	1	1
BROWNE_HCMV_INFECTION_18HR_DN_Down	1.15106	1	1.58697	1	1	1.49293	1	1	1	1	1	1.50673	1	1	1	1	1	1	1.23776	1	1	1	1.02062	1.16617	1	1.65322	1	1.06439	1	1.43128	1	1.31207	1	1.41658	1.36913	1	1.05458	1	1	1.00724	1	1	1.61195	1	1	1	1.57129
BROWNE_HCMV_INFECTION_18HR_DN_Up	1	1	1	1	1.19408	1	1.63822	1	1	1.03644	1	1	1	1.44415	1.08495	1	1.11861	1.06675	1	1.63029	1.38643	1.53377	1	1	1.10302	1	1.41287	1	1.08022	1	1.15378	1	1	1	1	1.09172	1	1.27266	1.66581	1	1	1.04814	1	1.7572	1.30973	1	1
BROWNE_HCMV_INFECTION_18HR_UP_Down	1.01608	1.23708	1	1.45783	1	1	1	1.50328	1.38213	1.25736	1	1.14187	1.43697	1.55659	1.70905	1.14827	1	1	1	1	1.0417	1.97997	1	1	1	1	1.35237	1	1	1.13084	1.05578	1.116	1	1	1	1.15781	1	1	1	1	1.42447	1.32218	1	1	1	1	1
BROWNE_HCMV_INFECTION_18HR_UP_Up	1	1	1	1	1	1	1	1	1	1	1	1	1	1	1	1	1	1	1	1	1	1	1	1	1	1	1	1	1	1	1	1	1	1	1	1	1.12788	1	1	1	1	1	1	1	1	1	1
BROWNE_HCMV_INFECTION_1HR_DN_Down	1	1.02271	1	1.19103	1	1	1.27705	1.09041	1	1.16363	1	1	1.19904	1.61585	1.50389	1	1	1	1	1	1	1.52196	1.21745	1.07014	1	1	1	1.12636	1.19216	1.14506	1	1	1	1.22231	1	1	1	1	1	1	1.20219	1.17837	1	1	1	1	1
BROWNE_HCMV_INFECTION_1HR_DN_Up	1	1	1	1	1.01195	1	1	1	1.11933	1	1.31976	1	1	1	1	1	1	1	1	1	1	1	1	1	1	1	1	1	1	1	1	1	1	1	1	1	1.05862	1	1.55536	1	1	1	1	1.13778	1	1	1
BROWNE_HCMV_INFECTION_1HR_UP_Down	1	1	1	1	1	1	1	1.4675	1	1	1	1	2.0742	1.34726	1.97797	1.10295	1	1	1	1	1	1.86654	1.2159	1	1.18725	1	1	1.23619	1.41795	1	1	1	1	1.22284	1	1	1	1	1	1	1.44427	1.29646	1	1.10549	1	1	1.34148
BROWNE_HCMV_INFECTION_1HR_UP_Up	1	1	1	1.17766	1	1.218	1	1	1	1	1	1	1	1	1	1	1.12249	1	1	1	1	1	1	1	1	1	1	1	1	1	1.34078	1.42128	1	1	1	1.54544	1.26789	1	1	1	1	1	1	1	1	1	1
BROWNE_HCMV_INFECTION_20HR_DN_Down	1	1	1	1	1	1	1	1.42229	1.07625	1.03294	1	1.27038	1.9211	1.03038	1.54117	1	1	1	1	1	1	1	1	1	1	1	1	1	1	1.49532	1	1	1	1	1	1	1	1	1	1	1.23545	1	1	1	1	1	1.5172
BROWNE_HCMV_INFECTION_20HR_DN_Up	1.02979	1.0151	1	1.42298	1.08816	1	1.61845	1	1	1	1	1	1	1	1	1.12592	1.04198	1.47258	1	1.63478	1.73918	1.16136	1	1	1.5678	1	1.19898	1	1.16797	1	1.67433	1.07653	1	1	1.09542	1.30264	1.23505	1.64535	1.47113	1.79456	1	1.20566	1	1.58249	1.17881	1	1
BROWNE_HCMV_INFECTION_20HR_UP_Down	1	1	1.1572	1	1	1	1	1.09744	1	1	1	1	1.58932	1.60364	1.60762	1	1	1	1	1	1	1.42458	1	1	1	1	1	1	1.38182	1.26204	1	1	1	1.15868	1	1	1	1	1	1.14187	1.17591	1.34401	1.1556	1	1	1	1
BROWNE_HCMV_INFECTION_20HR_UP_Up	1	1	1	1	1	1	1.0017	1	1	1	1	1	1	1	1	1	1	1	1	1	1	1	1	1	1	1	1	1	1	1	1	1	1	1	1	1.55827	1.35339	1	1	1	1	1	1	1	1	1	1
BROWNE_HCMV_INFECTION_24HR_DN_Down	1.0939	1	1.18066	1.30774	1	1.6244	1	1	1.4582	1	1.50008	1.30435	1.83424	1	1.27487	1	1	1	1.25659	1	1	1	1.39662	1.01734	1.12187	1.41215	1.22401	1.02368	1	1.67678	1	1.19716	1.24083	1	1.22168	1	1.0869	1	1	1	1.60417	1	1.1777	1	1	1	1.85683
BROWNE_HCMV_INFECTION_24HR_DN_Up	1	1	1	1	1	1	1.93649	1	1	1	1	1	1	1.28908	1	1.48577	1	1.63622	1	1.71624	1.55081	1.21312	1	1	1	1	1	1	1.05794	1	1.23456	1	1	1.26598	1	1	1	1.57035	1	1.24454	1	1.12812	1	1.91082	1.58579	1	1
BROWNE_HCMV_INFECTION_24HR_UP_Down	1	1	1	1	1	1	1	1	1	1	1	1	1	1.2125	1.14352	1	1.03514	1.08567	1	1	1	1.22006	1	1	1	1	1	1	1.11809	1	1	1.15352	1	1	1.1615	1.0148	1	1.31269	1.64324	1.11227	1.42226	1.42184	1	1	1	1	1
BROWNE_HCMV_INFECTION_24HR_UP_Up	1	1	1	1	1	1	1	1	1.18975	1.15349	1.04089	1	1	1	1	1	1	1	1	1	1	1	1	1.04856	1	1	1	1	1	1	1	1	1	1	1	1	1	1	1	1	1	1	1	1	1	1	1
BROWNE_HCMV_INFECTION_2HR_DN_Down	1	1	1	1.07545	1	1.01682	1	1.15828	1	1.73595	1.95241	1.05398	1	1.04355	1	1	1.26745	1	1	1	1	1	1	1.07072	1	1.03775	1.55086	1	1	1	1	1.04016	1	1.11779	1	1.05282	1	1	1	1.27368	1.26761	1.47164	1.00389	1	1	1	1
BROWNE_HCMV_INFECTION_2HR_DN_Up	1	1.00381	1	1	1.1876	1	1.3575	1	1	1	1	1	1.02124	1	1	1.10104	1	1.19397	1.236	1.05295	1.24015	1.4083	1	1	1.27437	1	1	1	1	1	1.2174	1	1.29133	1	1	1	1	1	1	1	1	1	1	1.57948	1.53969	1.26685	1.05284
BROWNE_HCMV_INFECTION_2HR_UP_Down	1.33593	1.0794	1.19029	1	1	1	1	1	1.78098	1	1	1.03693	1.52345	1	1	1	1.25005	1	1	1	1	1	1	1	1	1.14172	1	1	1	1	1	1	1	1	1.90724	1	1	1	1	1.58957	1.38013	1.61636	1.21367	1	1	1.48735	1.45248
BROWNE_HCMV_INFECTION_2HR_UP_Up	1	1	1	1	1.2742	1	1.6237	1	1	1	1.00846	1	1	1	1	1.63607	1	1.63494	1	1.55791	1.56525	1.3491	1	1	1	1	1.63089	1.32782	1.14115	1	1.67558	1	1.14449	1.01374	1	1	1.16345	1.24318	1.09781	1	1	1	1	1.19816	1	1	1
BROWNE_HCMV_INFECTION_30MIN_DN_Down	1.10856	1.30012	1	1.13734	1	1.13926	1	1.49471	1.07974	1.29531	1	1.33187	1.62942	1.35202	1.65378	1.27088	1	1	1	1	1	1.17743	1.14212	1	1	1	1	1	1	1.70181	1.23069	1.01378	1	1	1	1	1	1.16025	1.26768	1	1.21378	1	1	1	1	1	1
BROWNE_HCMV_INFECTION_30MIN_DN_Up	1	1	1	1	1.16867	1	1.07853	1	1	1	1	1	1	1	1	1	1.33754	1.0831	1	1	1	1	1	1	1	1	1	1	1	1	1	1	1.01052	1	1	1.08692	1.44368	1	1	1.27752	1	1	1	1	1.19372	1.45397	1
BROWNE_HCMV_INFECTION_30MIN_UP_Down	1.0773	1	1.36158	1	1	1.28758	1	1	1.24091	1	1	1	1	1.05354	1	1.20586	1	1	1	1	1	1	1.17404	1	1	1	1	1	1	1	1	1.00875	1	1	1.179	1.65817	1.14028	1	1	1	1.35544	1.07588	1.35435	1	1	1	1.21285
BROWNE_HCMV_INFECTION_30MIN_UP_Up	1	1.05332	1	1.5582	1.45147	1	1.40403	1.19474	1	1.37559	1.18892	1.64758	1	1	1	1	1.88426	2.25382	1	1.5774	1.29189	1	1	1	1.26509	1	1.40328	1	1	1	1	1	1.02123	1.60751	1	1	1	1.55859	1.24761	1	1	1	1	1.43988	1.35654	1	1
BROWNE_HCMV_INFECTION_48HR_DN_Down	1.14276	1	1.1957	1	1	1.32344	1	1.29515	1.3517	1	1.2494	1.13448	1.61388	1.01677	1.24059	1	1.04229	1	1.26186	1	1	1	1.13271	1.22525	1	1	1	1	1	1.39534	1	1.03977	1	1.14364	1.25381	1	1.03489	1	1	1	1.27747	1	1.18376	1	1	1	1.43939
BROWNE_HCMV_INFECTION_48HR_DN_Up	1	1	1	1.08662	1.16918	1	1.64785	1	1	1.00599	1	1	1	1	1	1.46395	1	1.48254	1	1.84528	1.72067	1.11126	1	1	1.05169	1	1.11231	1.42006	1.60046	1	1.55355	1	1.10855	1	1	1	1	1.10834	1.34556	1.28535	1	1	1	1.73023	1.37882	1.10326	1
BROWNE_HCMV_INFECTION_48HR_UP_Down	1	1	1	1.01408	1	1.23117	1	1.06878	1.05055	1	1	1	1.16306	1	1.18683	1.01235	1	1	1.31273	1	1	1	1.10435	1	1	1	1	1	1	1	1	1	1	1	1.11152	1.02651	1	1	1	1	1.10435	1.22844	1	1	1	1	1.09363
BROWNE_HCMV_INFECTION_48HR_UP_Up	1	1	1	1	1	1	1.11518	1	1	1.14178	1	1	1	1	1	1	1.06725	1.02341	1	1.31852	1	1	1	1	1	1	1	1	1.37932	1.00494	1	1.09115	1	1.27182	1	1	1.42288	1	1	1	1	1	1	1.25006	1.18241	1.15616	1
BROWNE_HCMV_INFECTION_4HR_DN_Down	1	1	1	1.31924	1	1.46696	1.02972	1	1	1.20371	1	1.27453	1.16731	1.38848	1.41568	1.11265	1	1.16643	1	1	1	1.3492	1.27019	1	1	1.30782	1	1.03352	1	1.38722	1	1	1	1	1	1	1	1	1	1	1.25553	1.06013	1	1	1	1	1.0729
BROWNE_HCMV_INFECTION_4HR_DN_Up	1	1	1	1	1	1	1	1	1	1	1.31439	1	1	1	1	1	1	1	1	1.07982	1	1	1	1	1	1	1	1	1	1	1.15439	1	1.29256	1	1	1.00292	1	1	1.15836	1	1	1	1	1	1	1	1
BROWNE_HCMV_INFECTION_4HR_UP_Down	1	1	1	1	1	1	1	1.1067	1.11927	1	1	1	1.84101	1.28928	1.69782	1	1	1	1	1	1	1	1	1.06111	1	1.10026	1	1	1	1.10648	1	1	1	1	1	1	1	1	1	1	2.25191	1.60919	1	1	1	1	1
BROWNE_HCMV_INFECTION_4HR_UP_Up	1.1173	1	1.22277	1	1	1	1.06517	1	1	1.14262	1	1.46007	1	1	1	1.31258	1.10027	1.63459	1	1.62331	1.80846	1.00128	1	1	1	1	1	1	1.09392	1	1	1	1	1.02474	1	1	1.00697	1	1	1	1	1	1.19621	1	1	1.14367	1
BROWNE_HCMV_INFECTION_6HR_DN_Down	1	1.30259	1	1.45567	1	1.21432	1	1.37264	1.1484	1.67404	1.58344	1.14081	1.72753	1.75217	1.87839	1	1	1	1.08568	1	1.09781	1.90755	1	1	1	1	1	1	1	1.28592	1.06225	1	1	1.06895	1	1	1	1	1	1	1.8066	1.20646	1	1	1	1	1.06671
BROWNE_HCMV_INFECTION_6HR_DN_Up	1	1	1	1	1	1	1.10202	1	1	1	1	1	1	1	1	1	1	1.15494	1	1	1	1	1	1.11	1	1	1	1	1	1	1	1	1	1	1.17325	1.01924	1.06824	1	1.00848	1.15716	1	1	1	1.22694	1.22646	1.01264	1
BROWNE_HCMV_INFECTION_6HR_UP_Down	1.32322	1.03828	1.50052	1.09743	1	1.08313	1	1	1	1.2487	1.00479	1.06084	1	1	1	1	1	1	1.52088	1	1	1	1.12169	1.20567	1	1	1	1	1	1.32431	1	1	1.0655	1.15397	1.27141	1	1.39055	1	1	1.05615	1.845	1.12723	1.5152	1	1	1.13539	1
BROWNE_HCMV_INFECTION_6HR_UP_Up	1	1	1	1	1	1	1.12944	1	1	1	1	1	1	1	1	1	1	1.201	1	1.32277	1	1	1	1	1.11949	1.26069	1	1	1	1	1.37578	1	1	1	1	1.89634	1	1.33688	1	1	1	1	1	1	1	1	1.09654
BROWNE_HCMV_INFECTION_8HR_DN_Down	1	1	1	1.33396	1	1	1	1	1	1.03885	1.44437	1	1.0041	1.48583	1.42348	1	1	1	1.34027	1	1	1	1.08664	1	1	1	1	1	1	1.14138	1	1	1	1	1.31007	1	1	1.18323	1	1	1	1	1	1	1	1	1.53743
BROWNE_HCMV_INFECTION_8HR_DN_Up	1.08718	1.01201	1	1	1.30341	1	1.56304	1	1.04042	1	1	1	1	1	1	1	1	1	1	1.42372	1.19136	1	1	1	1.2373	1.10663	1	1	1.03704	1	1.23656	1	1	1.19406	1	1.12952	1	1	1	1.33602	1	1	1	1.72193	1.77224	1.23927	1
BROWNE_HCMV_INFECTION_8HR_UP_Down	1.04986	1.12144	1.11129	1.32509	1	1.35646	1	1.23338	1.51142	1.11944	1.13939	1	1	1	1.03102	1	1.20654	1.2612	1	1	1	1.00634	1	1	1	1.10779	1.27311	1	1	1	1	1.32532	1	1	1.22522	1.32528	1	1	1.06327	1.09552	1.31207	1.40565	1.10196	1.04577	1.01187	1	1.35794
BROWNE_HCMV_INFECTION_8HR_UP_Up	1	1	1	1	1	1	1	1	1	1	1	1.00887	1	1	1	1	1	1	1	1	1	1	1	1	1.07371	1	1	1	1	1	1	1	1	1	1	1	1	1	1	1	1	1	1	1	1	1	1
BROWNE_INTERFERON_RESPONSIVE_GENES_Down	1	1	1	1.36726	1	1.63572	1	1	1.62582	1	1.18154	1	1	1	1	1	1	1	1.37888	1	1	1	1.21063	1.49149	1	1.66383	1	1.33222	1	1	1	1	1.04945	1	1.25809	1	1	1	1	1	2.55647	2.19135	1	1	1	1	1
BROWNE_INTERFERON_RESPONSIVE_GENES_Up	1	1	1	1	1.38057	1	1.07755	1	1	1	1	1	1	1.21417	1	1.43085	1	1.79307	1	1.90375	1.65455	1.56588	1	1	1	1	1	1	1.26248	1	1.22345	1	1	1	1	1	1.06709	1.74306	1.38199	1	1	1	1	1.27186	1.25053	1.65804	1.58673
BRUECKNER_TARGETS_OF_MIRLET7A3_DN_Down	1	1	1.09737	1	1	1	1	1	1	1	1.04565	1.20486	1.391	1	1	1	1	1	1.2347	1	1	1	1	1.17314	1	1	1	1	1	1	1	1	1	1	1.23744	1	1.05851	1	1.23762	1	1.11539	1	1.10386	1	1	1	1.56572
BRUECKNER_TARGETS_OF_MIRLET7A3_DN_Up	1	1	1	1	1	1	1.65964	1	1	1.15947	1	1	1	1.22613	1	1	1.56507	1.41376	1	1.68342	1.2932	1	1	1	1.09436	1	1.26068	1	1.48489	1	1.4046	1	1	1	1	1.21013	1	1.51393	1	1.07539	1	1	1	1.68586	1.15602	1	1
BRUECKNER_TARGETS_OF_MIRLET7A3_UP_Down	1	1	1.03132	1	1	1	1	1.20558	1.10411	1	1.0382	1	1.27894	1	1.31945	1	1	1	1.31273	1	1	1	1.06076	1	1	1	1	1	1	1	1	1	1.02424	1.34163	1	1	1	1	1	1	1	1	1.03743	1	1.02004	1	1
BRUECKNER_TARGETS_OF_MIRLET7A3_UP_Up	1	1	1	1	1	1	1.59157	1	1	1.05908	1	1	1	1	1	1.38147	1	1.37062	1	1.66095	1.24305	1	1	1.00909	1	1	1	1	1.2419	1	1.95369	1.29444	1	1	1.01625	1.0598	1.21139	1	1.11862	1	1	1	1	1.12346	1	1	1
BRUINS_UVC_RESPONSE_EARLY_LATE_Down	1	1	1	1	1	1.17892	1	1	1	1.10976	1.52285	1	1	1	1	1	1	1	1	1	1	1	1	1	1	1	1.0041	1	1	1.19496	1	1	1.27038	1	1	1	1	1	1	1	1	1	1	1	1	1	1.05286
BRUINS_UVC_RESPONSE_EARLY_LATE_Up	1	1	1	1	1	1	1	1	1	1	1	1	1.0986	1	1	1	1	1	1	1	1	1.0503	1	1.04716	1	1	1	1	1	1	1	1	1	1.05552	1	1	1.1566	1	1	1.23096	1	1	1	1.01205	1	1	1
BRUINS_UVC_RESPONSE_LATE_Down	1	1	1	1	1	1	1	1	1.02895	1	1.07341	1	1	1	1	1	1	1	1	1	1	1	1	1	1	1.18065	1	1	1	1	1	1	1	1	1.53118	1	1	1	1	1	1	1	1	1	1	1	1
BRUINS_UVC_RESPONSE_LATE_Up	1.01409	1	1	1	1	1	1.53029	1.12978	1	1.10058	1	1	1.34312	1.60161	1.51586	1.08622	1	1.14717	1	1.33869	1.30423	1.5794	1	1	1.25156	1	1.25095	1	1.19445	1	1.4008	1	1	1.00969	1	1	1.0506	1	1	1.20539	1	1.39499	1	1.50167	1.12442	1	1
BRUINS_UVC_RESPONSE_MIDDLE_Down	1.30912	1.35981	1.35432	1	1	1	1	1	1	1	1	1.17005	1	1	1	1	1	1	1	1	1	1	1	1	1	1	1	1	1	1	1	1.01207	1	1	1.54893	1.04448	1	1	1	1	1	1	1.35554	1	1	1.38243	1
BRUINS_UVC_RESPONSE_MIDDLE_Up	1	1	1	1	1	1	1	1.12544	1	1	1	1	1.67385	1	1.36806	1	1	1	1	1	1	1.13545	1	1	1	1	1	1	1	1	1	1	1	1.26626	1	1	1.08371	1	1	1	1.13427	1.18811	1	1.1833	1	1	1
BRUINS_UVC_RESPONSE_VIA_TP53_GROUP_A_Down	1.13132	1.11289	1.23793	1	1	1	1	1.22265	1	1	1	1	1.0881	1	1.03691	1	1	1	1.23062	1	1	1	1.21327	1.04071	1.16361	1.06325	1	1.13674	1	1.39879	1	1.34591	1	1.00791	1.32721	1	1	1	1	1	1.17934	1	1.24333	1	1	1	1.17347
BRUINS_UVC_RESPONSE_VIA_TP53_GROUP_A_Up	1	1	1	1.43577	1.19734	1	1.40955	1	1.01072	1.06076	1	1	1	1.13213	1	1.29429	1.00274	1.29302	1	1.34681	1.21858	1.14035	1	1	1	1	1.12459	1	1	1	1.13424	1	1.22474	1	1	1.19459	1	1.03607	1.30032	1.10351	1	1.11698	1	1.21551	1.16833	1.12114	1
BRUINS_UVC_RESPONSE_VIA_TP53_GROUP_B_Down	1.1621	1	1.5321	1	1	1.16337	1	1	1	1	1	1	1	1	1	1	1.04754	1	1.20486	1	1	1	1.05411	1.05731	1	1	1	1	1	1	1	1	1.09148	1	1.40422	1	1	1	1	1	1	1	1.52285	1	1	1	1
BRUINS_UVC_RESPONSE_VIA_TP53_GROUP_B_Up	1	1.0871	1	1.29828	1.11283	1	1.51506	1.20184	1	1.65704	1	1.36475	1	1.1923	1.03407	1.20485	1	1.23667	1	1.45085	1.2826	1.15903	1	1	1.36662	1.0892	1.4928	1	1	1	1.36938	1	1	1.09234	1	1	1.0949	1.57084	1.52619	1.02619	1.09777	1.15315	1	1.72902	1.15465	1	1.20679
BRUINS_UVC_RESPONSE_VIA_TP53_GROUP_C_Down	1.18168	1.25915	1.28225	1	1	1	1	1	1	1	1	1	1	1	1	1	1	1	1	1	1	1	1	1	1	1.0072	1.05279	1	1	1	1	1	1	1	1	1	1	1	1	1	1.10478	1.04544	1.28126	1	1	1	1.14093
BRUINS_UVC_RESPONSE_VIA_TP53_GROUP_C_Up	1	1	1	1	1.26656	1.00938	1	1	1	1	1	1.07646	1	1	1	1	1	1	1	1.02207	1.11931	1	1	1	1.10906	1	1	1	1	1.28577	1	1	1	1	1	1	1	1.32803	1	1	1	1	1	1.25621	1.24347	1.06855	1
BRUINS_UVC_RESPONSE_VIA_TP53_GROUP_D_Down	1	1	1	1	1	1.2418	1.10439	1.38371	1.09377	1.07173	1	1	1.17648	1	1.03498	1	1	1	1.17687	1	1.18657	1	1	1	1	1	1.28928	1	1	1.28342	1	1.20533	1.32369	1.41206	1.26452	1	1.16482	1	1	1	1.12179	1	1	1.19375	1	1	1.19956
BRUINS_UVC_RESPONSE_VIA_TP53_GROUP_D_Up	1	1	1	1	1.13099	1	1	1	1	1	1.54854	1	1	1	1	1	1.05598	1	1	1	1	1	1	1	1	1	1	1.95766	1.7593	1	1.09232	1	1	1	1	1.14601	1	1	1.5562	1.09595	1	1	1	1	1	1.19258	1
BRUNO_HEMATOPOIESIS_Down	1.69714	1.26797	1.46848	1.40505	1.11774	1.05327	1	1	1.01996	1	1.10171	1	1	1	1	1	1	1	1.43574	1	1	1	1	1	1	1	1	1	1	1	1	1.02462	1	1	1.33397	1.08753	1	1	1	1	1.08596	1	1.45423	1	1	1	1
BRUNO_HEMATOPOIESIS_Up	1	1	1	1	1	1	1.54339	1	1	1.21771	1	1.42142	1	1.36285	1	1	1	1.31711	1	1.43325	1	1	1	1.22723	1	1	1.13715	1.11672	1	1	1.27715	1	1.20127	1	1	1	1	1.25822	1.11302	1	1	1	1	1.78427	1.33866	1	1
BURTON_ADIPOGENESIS_1_Down	1.27291	1	1.79579	1	1	1.61122	1	1	1	1	1.0071	1	1	1.14662	1	1	1	1	1	1	1	1	1	1	1	1	1	1	1	1.047	1	1	1	1	1.02842	1.12262	1	1	1	1	1	1	1.79675	1	1	1	1.10154
BURTON_ADIPOGENESIS_1_Up	1	1.1145	1	1	1.35843	1	1.68951	2.22187	1	1.82153	1	1.68019	1	1	1	1.33143	1.09362	1.74688	1.15186	1.28303	1.51759	1.37254	1	1.68909	2.03542	1.25222	1.64185	1.59343	1.12008	1	1.22377	1	1.23484	1.10311	1	1	1.04693	1.13589	1.61771	1.11868	1.43526	1.04235	1	1.70413	1.37871	1	1
BURTON_ADIPOGENESIS_10_Down	1.36292	1.47125	1.07556	1	1.50514	1	1	1	1.53636	1.28389	1.22409	1.01617	1	1	1	1	1.06666	1	1.14061	1	1	1	1	1	1.63204	1	1	1	1	1	1	1	1	1.1928	1	1.02494	1	1	1	1	1	1	1.06468	1	1	1	1.37732
BURTON_ADIPOGENESIS_10_Up	1	1	1	1	1	1.24972	1	1	1	1	1	1	1	1.39643	1.03215	1	1	1	1	1	1	1	1	1	1	1	1	1	1	1	1.10174	1	1	1	1	1	1	1.02471	1.64902	1	1	1	1	1.47958	1	1	1
BURTON_ADIPOGENESIS_11_Down	1	1.24369	1	1.77717	1.07639	1.57652	1	1.64555	2.09823	1.42951	1.51267	1.39549	2.22911	1	1.20345	1	1	1	1	1	1	1	1	1	1	1.2728	1.35383	1	1	1.23554	1	1	1.39642	1	1.37467	1	1	1	1	1	1.6653	1	1	1	1	1	1.31158
BURTON_ADIPOGENESIS_11_Up	1.00268	1	1.47903	1	1	1	1.79166	1	1	1	1	1	1	1	1	1	1	1.01199	1	1.39345	1.19536	1.01526	1.16873	1.53954	1.22915	1	1	1.0264	1.44232	1	1.78477	1	1	1	1	1	1.15062	1	1	1.7039	1	1	1.47357	1.76009	1.4632	1	1
BURTON_ADIPOGENESIS_12_Down	1	1.03973	1	1.91521	2.31057	1.12607	1	1.95564	1.84035	2.36704	1.9015	1.74873	1.90473	2.14931	2.21819	1	1	1	1.0401	1	1	2.17902	1	1	1	1	1.56254	1	1	1.1374	1	1	1.36666	1	1	1	1	1.24192	1	1	1.79652	1.52223	1	1	1	1	1
BURTON_ADIPOGENESIS_12_Up	1	1	1.15611	1	1	1	1	1	1	1	1	1	1	1	1	1	1	1	1	1	1	1	1.42482	1.23411	1	1	1	1	1.48856	1	1.25534	1.16977	1	1	1.44508	1.06163	1.11392	1	1	1	1	1	1.14988	1	1	1.0606	1
BURTON_ADIPOGENESIS_2_Down	1	1	1.39583	1	1	1	1	1	1	1	1	1	1	1	1	1	1	1	1	1	1	1	1	1	1	1.07002	1	1	1.17389	1.36089	1	1.00273	1	1	1	1	1	1	1	1	1	1	1.40224	1	1	1	1
BURTON_ADIPOGENESIS_2_Up	1	1	1	1	1.25059	1	1.51845	1.0727	1.19471	1.31064	1	1.45081	1	1	1	1.35305	1	1.2679	1	1.61092	1.58078	1	1	1	1.30035	1	1	1	1	1	1.14181	1	1	1.33379	1	1.0934	1.44582	1.25578	1.30025	1	1	1	1	1.64773	1.19998	1.10994	1
BURTON_ADIPOGENESIS_3_Down	1	1	1	2.86042	1.9019	2.17768	1	1	1	2.16529	1.92543	2.38871	1	1.35308	1	1.2761	1	1	1.20619	1	1	1	1	1	1	1	1	1	1	1	1	1.02359	1	1.10718	1.23641	1.41783	1	2.03632	1.7454	1	1.09313	1	1	1	1	1	1.40766
BURTON_ADIPOGENESIS_3_Up	1.10587	1.28902	1	1	1	1	1.22246	1.55605	1	1	1	1	1.57125	1	1	1	1.67451	1.54067	1	1.37138	1.09977	1.19341	1.18941	1	2.67018	1	1	1.75606	1.71466	1.15264	1	1	1.25306	1	1	1	1.30592	1	1	1	1	1	1	1.03295	1.11648	1.47976	1
BURTON_ADIPOGENESIS_4_Down	1	1	1.04353	1	1.09188	1.04987	1	1	1	1	1.08757	1.73204	1	1	1	1	1	1	1	1	1	1	1	1	1	1	1	1	1	1	1	1	1	1	1	1.41453	1.20947	1.7261	1.24689	1	1	1	1.04973	1	1	1	1
BURTON_ADIPOGENESIS_4_Up	1	1	1	1	1	1	1.50109	1.16871	1	1	1	1	1.0578	1	1	1	1.09125	1.42492	1	1.56836	1.5846	1.29508	1	1	1.13154	1	1.20607	1	1.04816	1	1.35742	1	1	1	1.29193	1	1	1	1	1	1	1	1	1.46238	1	1	1
BURTON_ADIPOGENESIS_5_Down	1.20143	1	1.27084	1	1	1	1	1	1	1	1	1	1	1	1	1	1	1	1	1	1	1	1	1.23306	1	1	1	1	1	1	1	1	1	1	1	1	1	1	1	1	1	1	1.26316	1	1	1	1
BURTON_ADIPOGENESIS_5_Up	1	1	1	1	1	1.17692	1	1.84318	1.60225	2.02506	1	1.83664	2.11497	2.14116	2.17506	1	1	1	1	1.07121	1	1.88993	1	1	1	1	1	1	1	1.29296	1	1	1	1.1536	1	1	1	1	1	1	1.40331	1.11308	1	1	1	1	1
BURTON_ADIPOGENESIS_6_Down	1	1	1.28013	1	1	1	1	1	1	1	1	1	1	1	1	1	1.2175	1	1.08457	1	1	1	1	1.32083	1	1	1	1	1	1	1	1	1	1	1	1	1	1	1	1	1	1	1.28853	1	1	1	1.02652
BURTON_ADIPOGENESIS_6_Up	1	1	1	1	1	1.26811	1	1.87846	1.5024	2.20247	1	2.35932	1.80186	2.04292	2.08186	1.27378	1	1	1	1	1	1.9558	1	1	1	1	1.24629	1	1	1	1	1	1	1	1	1	1	1	1.46343	1	1.23374	1.13001	1	1	1	1	1
BURTON_ADIPOGENESIS_7_Down	1.6065	1.42153	1.64781	1	1	1.13062	1	1	1	1	1	1	1	1	1	1	1	1	1.4725	1	1	1	1	1.39375	1	1.3907	1	1	1	1.32964	1	1.28422	1	1.40803	1	1	1	1	1	1	1	1	1.6171	1	1	1	1.38902
BURTON_ADIPOGENESIS_7_Up	1	1	1	1	1	1	1.8401	1.59267	1	1.67201	1.27986	1.13933	1	1.43563	1.03564	1.01647	1.25018	1.32121	1	1.51888	1.11974	1.41231	1	1	1.42797	1	1.77143	1	1	1	1.09697	1	1.06506	1	1	1	1	1.29566	1.35064	1.70934	1	1.50389	1	1.69818	1.63427	1.40541	1
BURTON_ADIPOGENESIS_8_Down	1.46915	1	1.73104	1.16734	1	1	1	1	1.06563	1	1	1.01406	1	1	1	1	1	1	1.04585	1	1	1	1	1.2655	1	1.38627	1	1	1	1.22642	1	1	1.28917	1	1.69508	1	1	1	1	1	1	1	1.74039	1	1	1	1.47468
BURTON_ADIPOGENESIS_8_Up	1	1	1	1	1	1	2.01407	1.73103	1	1.7497	1	1	1	1.7237	1.27069	1.3516	1.03695	1.68905	1	2.04119	2.04204	1.96466	1	1	1.22103	1	1.5275	1	1.71204	1	2.17741	1	1	1	1	1	1	1.18273	1.02754	1.282	1	1.45277	1	2.11206	1.56058	1	1
BURTON_ADIPOGENESIS_9_Down	1.28038	1.28192	1.35521	1	1	1.48812	1	1	1.49559	1	1.01762	1	1	1	1	1	1	1	1	1	1	1	1	1.13634	1	1.01161	1	1	1	1	1	1.23302	1	1.2318	1.70222	1.30929	1	1	1	1	1.58126	1.11237	1.35324	1	1	1	1.74274
BURTON_ADIPOGENESIS_9_Up	1	1	1	1	1	1	1.79556	1.43244	1	1.62728	1	1.09429	1	1.40288	1	1.67701	1	1.87439	1	1.74997	1.79862	1.66747	1	1	1.09585	1	1.1968	1	1	1.11765	1.38725	1	1.51818	1	1	1	1.28655	1.72562	1.64681	1.36241	1	1	1	1.83149	1.33489	1	1
BURTON_ADIPOGENESIS_PEAK_AT_0HR_Down	1.81906	1.62738	1.76523	1	1	1.22274	1	1	1.85821	1	1.17399	1	1.22884	1	1	1	1	1	1.20381	1	1	1	1	1.17765	1	1.07847	1	1	1	1.41503	1	1.36935	1	1.09571	1.93454	1.18066	1	1	1	1	1.28828	1	1.74703	1	1	1	1.65747
BURTON_ADIPOGENESIS_PEAK_AT_0HR_Up	1	1	1	1	1	1	1.97003	1	1	1.50816	1	1.14881	1	1.57773	1	1.27371	1.29958	1.806	1	1.94806	1.8063	1.71741	1	1	1.27197	1	1.42502	1.03449	1.16314	1	2.20484	1	1.09613	1	1	1	1.08035	1.20696	1.745	1.69216	1	1.44551	1	2.11371	1.61503	1.15284	1
BURTON_ADIPOGENESIS_PEAK_AT_16HR_Down	1	1	1	1.96514	2.0348	1.30808	1	1	1	1.25711	1	1.43082	1	1	1	1	1	1	1	1	1	1	1	1	1	1	1	1	1	1	1	1	1	1	1	1	1	1.64132	1.72933	1	1	1	1	1	1.01515	1	1
BURTON_ADIPOGENESIS_PEAK_AT_16HR_Up	1.76046	1.55432	1.50305	1	1	1	1	1.3573	1	1	1	1	1.62359	1.23344	1.58517	1	1.10055	1.27038	1	1.2794	1.33391	1.54392	1.36342	1.07116	2.09659	1	1.34585	1.83638	1.63179	1.29764	1	1	1.31974	1	1	1.06875	1	1	1	1	1	1	1.50477	1	1	1.17858	1
BURTON_ADIPOGENESIS_PEAK_AT_24HR_Down	1	1	1	2.09761	2.23192	1.36217	1	1	1	1.99566	1.67988	1.41659	1	1.41283	1	1	1	1	1.17196	1	1.17024	1	1	1.21916	1	1.2907	1	1	1	1	1	1.08719	1	1	1.38354	1.25009	1	1.58414	1.78013	1	1	1	1	1	1	1	1
BURTON_ADIPOGENESIS_PEAK_AT_24HR_Up	1.5106	1.2853	1.1939	1	1	1	1.05056	2.22675	1.17425	1	1	1	2.11507	1	1.42341	1	1	1	1	1	1	1.29471	1	1	2.37738	1	1	1.0977	1.68455	1	1	1	1.28487	1	1	1	1	1	1	1	1	1	1.17456	1.03585	1.11247	1.03289	1
BURTON_ADIPOGENESIS_PEAK_AT_2HR_Down	1.22842	1	1.67615	1	1	1.76527	1	1	1.29494	1	1.27438	1	1	1	1	1	1.25094	1	1.03896	1	1	1	1.03685	1	1	1	1	1	1	1	1	1.13142	1	1	1.6531	1.37888	1	1	1	1	1.33599	1.03041	1.66911	1	1	1.26425	1.27899
BURTON_ADIPOGENESIS_PEAK_AT_2HR_Up	1	1.20842	1	1.70986	1.605	1	1.87612	2.26411	1	2.03942	1	1.85877	1	1	1	1.68196	1	1.56042	1	1.59286	1.43312	1.09213	1	1.16225	1.99007	1.04574	1.67076	1.50224	1	1	1.22296	1	1.52649	1	1	1	1.06815	1.55875	1.79173	1.04833	1	1	1	1.79653	1.4111	1	1
BURTON_ADIPOGENESIS_PEAK_AT_8HR_Down	1	1	1.4441	1	1	1	1	1	1	1	1	1	1	1	1	1	1	1	1	1	1	1	1.30464	1	1	1.1908	1	1	1	1	1	1	1	1	1.14452	1.00274	1	1	1.49128	1	1.28442	1.08071	1.44039	1	1	1	1
BURTON_ADIPOGENESIS_PEAK_AT_8HR_Up	1	1	1	1	1.13492	1	1	1	1	1	1	1.86859	1	1	1	1.02766	1.12037	1.42669	1	1.4275	1.49727	1.25926	1	1	1	1	1	1	1	1	1	1	1.05831	1	1	1	1.18915	1	1	1	1	1	1	1.13294	1.03478	1.28362	1
BUYTAERT_PHOTODYNAMIC_THERAPY_STRESS_DN_Down	1	1	1.0463	1.29175	1	1.29694	1	1	1	1	1.0763	1.01472	1	1	1	1	1	1	1	1	1	1	1	1	1	1.0481	1	1	1	1	1	1	1	1	1	1	1	1.45659	1	1	1	1	1.06312	1	1	1	1
BUYTAERT_PHOTODYNAMIC_THERAPY_STRESS_DN_Up	1	1.11167	1	1	1	1	1.34816	1.27857	1.03528	1.13976	1	1	1.44157	1.30981	1.44798	1	1	1	1	1.31944	1.33776	1.48927	1	1	1.63482	1	1.13869	1	1.13509	1	1.04062	1	1	1.29791	1	1	1.03718	1	1	1	1.20356	1.04945	1	1.4158	1	1	1
BUYTAERT_PHOTODYNAMIC_THERAPY_STRESS_UP_Down	1.43105	1.39948	1.22163	1.48385	1	1.38049	1	1.39896	1.39118	1.3178	1.36024	1	1.77666	2.09733	2.08219	1	1.15752	1	1	1	1	1.91863	1	1	1	1	1.36063	1	1.10168	1.32091	1.04916	1	1	1	1	1	1	1	1	1	1.54094	1.14014	1.21127	1	1	1	1
BUYTAERT_PHOTODYNAMIC_THERAPY_STRESS_UP_Up	1	1	1	1	1	1	1	1	1	1	1	1	1	1	1	1.13493	1	1	1	1	1	1	1	1.01033	1	1	1	1	1	1	1	1.09038	1	1	1.33317	1.25712	1.16591	1.28146	1.09031	1	1	1	1	1.01587	1	1	1
BYSTROEM_CORRELATED_WITH_IL5_DN_Down	1.25123	1.51429	1	1	1	1	1	1.29271	1.03947	1.3568	1	1.48966	1.82248	1.93191	2.11675	1	1	1	1	1	1.00602	1.76411	1	1	1	1.06871	1.06446	1.16961	1	1.16036	1	1	1	1.00845	1	1	1	1	1	1	1.45354	1.31296	1	1	1	1	1.37522
BYSTROEM_CORRELATED_WITH_IL5_DN_Up	1	1	1	1	1	1	1.14582	1	1	1	1	1	1	1	1	1	1	1	1	1	1	1	1	1	1	1	1	1	1	1	1.04056	1	1.12788	1	1.20948	1	1	1	1	1	1	1	1	1	1	1.4874	1
BYSTROEM_CORRELATED_WITH_IL5_UP_Down	1.01009	1	1.07007	1	1	1	1	1.27276	1	1	1.67483	1	1	1	1	1	1	1	1.3566	1	1	1	1	1	1	1	1	1	1	1	1	1	1	1.02452	1	1	1	1	1	1	1	1	1.0805	1	1	1	1
BYSTROEM_CORRELATED_WITH_IL5_UP_Up	1	1	1	1	1.30406	1	1.52364	1	1	1	1	1	1.41585	1.30023	1.2532	1	1	1	1	1.38719	1	1.07715	1	1	1	1	1	1	1	1	1	1.21366	1	1	1.10988	1	1.36383	1	1.60754	1	1	1	1	1.21533	1	1	1
BYSTRYKH_HEMATOPOIESIS_STEM_CELL_AND_BRAIN_QTL_CIS_Down	1	1	1	1	1	1	1	1	1	1	1	1	1	1	1	1	1	1	1.05687	1	1	1	1	1	1	1	1.27151	1	1	1	1	1	1	1	1	1	1	1	1	1	1	1	1	1	1	1	1
BYSTRYKH_HEMATOPOIESIS_STEM_CELL_AND_BRAIN_QTL_CIS_Up	1	1	1	1	1	1	1	1	1.07373	1.03533	1	1	1.39585	1.12705	1.28865	1	1	1	1	1	1	1.1042	1	1	1	1.28317	1	1	1	1	1	1	1	1	1	1.19648	1	1	1	1	1.45403	1.49204	1	1	1	1	1
BYSTRYKH_HEMATOPOIESIS_STEM_CELL_AND_BRAIN_QTL_TRANS_Down	1.08247	1	1.12879	1	1	1	1	1	1	1.22099	1.08	1.19543	1	1	1	1	1	1	1	1	1	1	1	1	1	1	1.1637	1	1	1	1	1	1	1	1	1	1	1.65316	1	1.1628	1	1	1.13794	1	1	1	1
BYSTRYKH_HEMATOPOIESIS_STEM_CELL_AND_BRAIN_QTL_TRANS_Up	1	1	1	1	1	1	1	1	1	1	1	1	1.24215	1	1	1	1	1	1	1.03668	1	1.01093	1	1	1	1	1	1	1	1	1	1	1	1	1	1	1	1	1	1	1	1	1	1	1	1	1
BYSTRYKH_HEMATOPOIESIS_STEM_CELL_QTL_CIS_Down	1	1	1	1.20701	1	1	1	1	1	1	1	1	1	1	1	1	1	1	1.31835	1	1	1	1	1	1	1	1.13992	1	1	1	1	1.02837	1	1	1	1	1	1.01391	1	1	1	1	1	1	1	1	1
BYSTRYKH_HEMATOPOIESIS_STEM_CELL_QTL_CIS_Up	1	1	1	1	1	1	1.34533	1.23123	1.00838	1.56951	1	1.18232	1.50604	1.75987	1.74511	1.1873	1	1	1	1.24256	1	1.61625	1	1	1.00765	1.1811	1	1	1.13036	1	1	1	1.21281	1	1	1	1	1	1	1	1	1.12728	1	1	1	1.11794	1
BYSTRYKH_HEMATOPOIESIS_STEM_CELL_QTL_TRANS_Down	1	1	1	1	1	1	1	1	1	1	1.03462	1	1	1	1	1	1	1	1	1	1	1	1	1	1	1	1	1	1	1	1	1	1	1	1.23477	1	1	1	1	1	1	1	1	1	1	1	1
BYSTRYKH_HEMATOPOIESIS_STEM_CELL_QTL_TRANS_Up	1	1	1	1	1	1	1.22342	1	1.06422	1.00609	1	1	1.21247	1.27762	1.27749	1	1	1	1	1.30719	1.23991	1.37949	1	1	1.02263	1	1	1	1	1	1.04017	1	1.08132	1	1	1	1.08494	1	1.09989	1	1	1	1	1.24611	1.08256	1	1
CADWELL_ATG16L1_TARGETS_DN_Down	1.00573	1.22503	1	1	1	1	1	1	1.52951	1	1.00175	1	1	1.21756	1.21552	1	1	1	1.45903	1	1.39059	1.17958	1	1.21047	1	1	1	1	1	1	1.29359	1	1	1	1	1	1	1	1	1	1.35803	1.02385	1	1	1	1	1
CADWELL_ATG16L1_TARGETS_DN_Up	1	1	1	1.01864	1	1.3586	1	1	1	1	1	1.18333	1	1	1	1	1	1.08723	1	1	1	1	1.08613	1	1.06037	1	1	1	1	1	1	1.21748	1	1	1	1	1.49492	1	1.47665	1	1	1	1	1.60166	1.46651	1.40978	1
CADWELL_ATG16L1_TARGETS_UP_Down	1.17099	1.22845	1	1	1	1	1	1	1.04562	1	1.40242	1	1	1	1	1.33198	1	1	1.21015	1	1	1	1.17194	1.18342	1	1	1	1	1	1	1	1	1	1.08568	1.08368	1	1	1	1	1	1	1	1	1	1	1	1.24118
CADWELL_ATG16L1_TARGETS_UP_Up	1	1	1	1.0986	1.44693	1.16392	1.6516	1.12618	1	1.74222	1	1.09569	1.38001	1.19362	1.38249	1	1.29721	1	1	1.3614	1.13913	1.49691	1	1	1	1	1.14271	1	1	1	1.25047	1	1	1	1	1	1	1.23412	1.35941	1.29024	1.20875	1.47977	1	1.28325	1.09215	1.04156	1
CAFFAREL_RESPONSE_TO_THC_24HR_5_DN_Down	1.24963	1	1.18753	1	1.48673	1	1	1	1	1	1.8383	1	1	1	1	1	1	1	1	1	1.04233	1	1	1.06186	1	1	1	1	1	1	1	1	1	1	1	1	1	1.46395	1	1	1	1	1.21961	1	1	1	1
CAFFAREL_RESPONSE_TO_THC_24HR_5_DN_Up	1	1	1	1	1	1.2734	1	1.22452	1.11171	1	1	1	2.25751	1.43544	1.9905	1	1	1	1	1	1	1.65582	1	1	1	1.34736	1	1	1.37769	1	1	1.24613	1.01758	1	1.77286	1	1	1	1.5647	1	1	1.12286	1	1	1	1	1.17631
CAFFAREL_RESPONSE_TO_THC_24HR_5_UP_Down	1	1	1	1.45065	1.65554	1	1	1	1	1	1.083	1.37547	1	1	1	1	1	1	1	1	1	1	1	1	1	1	1	1	1	1	1	1	1	1	1	1	1	1.11397	1	1	1	1	1	1.1181	1.06272	1	1.06035
CAFFAREL_RESPONSE_TO_THC_24HR_5_UP_Up	1	1	1	1	1	1	1	1.16137	1	1	1	1	1.67476	1	1.22204	1	1	1	1	1	1	1	1	1	1.30665	1.11339	1	1	1	1	1.32091	1.11929	1	1	1	1.05531	1	1	1	1.21378	1	1	1	1	1	1	1
CAFFAREL_RESPONSE_TO_THC_DN_Down	1	1	1	1.44828	1.7008	1	1	1	1	1	1.12632	1.37317	1	1	1	1	1	1	1	1	1	1	1	1	1	1	1	1	1	1	1	1	1	1	1	1.16017	1.10305	1.48944	1	1	1	1	1	1	1.20349	1	1
CAFFAREL_RESPONSE_TO_THC_DN_Up	1	1.16123	1	1	1	1	1	1.85871	1.29723	1	1	1	1.68402	1.86226	1.90606	1	1	1	1	1	1	1.66158	1	1	1.39769	1.41042	1.11127	1	1	1.09047	1	1	1.18221	1	1	1	1	1	1	1.00824	1	1	1	1	1	1	1
CAFFAREL_RESPONSE_TO_THC_UP_Down	1.0332	1	1.00811	1.46509	1.43972	1.34275	1	1.5261	1.70454	1.57321	1.63021	1	1	1.00834	1	1	1.21412	1	1	1	1	1	1	1	1	1	1.25245	1	1	1	1	1	1	1	1	1	1	1.24317	1	1	1.02663	1	1.02141	1	1	1	1
CAFFAREL_RESPONSE_TO_THC_UP_Up	1	1	1	1	1	1	1.09216	1	1	1	1	1	1	1	1	1	1	1	1	1	1	1	1	1	1	1	1	1	1.50234	1	1	1	1	1	1.34587	1	1	1	1.36387	1	1	1	1	1.41595	1.25686	1.00536	1
CAIRO_HEPATOBLASTOMA_CLASSES_DN_Down	1	1	1.21632	1	1	1.47934	1	1	1.01975	1	1	1	1.76517	1.0182	1.43149	1	1	1	1.13559	1	1	1	1.19417	1.27161	1.03678	1.08509	1	1.18173	1.42059	1.61865	1	1	1	1	1.23809	1	1	1	1	1.45493	1.24872	1.35893	1.21595	1	1	1	1.56494
CAIRO_HEPATOBLASTOMA_CLASSES_DN_Up	1	1	1	1.56031	1.44156	1	1.61157	1	1	1.57627	1.06501	1.17502	1	1	1	1.36571	1	1.5596	1	1.66829	1.55093	1	1	1	1	1	1.2848	1	1	1	1.52902	1	1.02839	1.20996	1	1	1	1.28358	1.0975	1	1	1	1	1.75261	1.72291	1.54288	1
CAIRO_HEPATOBLASTOMA_CLASSES_UP_Down	1	1	1	1.96163	1	1.06014	1	1	1	1.7337	1.79715	1.46402	1	1	1	1	1	1	1	1	1	1	1	1	1	1.01367	1.18981	1	1	1	1	1	1	1	1	1	1	2.28474	1.68599	1	1	1	1	1	1	1	1
CAIRO_HEPATOBLASTOMA_CLASSES_UP_Up	1	1	1	1	1	1	1	1.20755	1	1	1	1	2.15043	1	1.65011	1	1	1	1	1	1	1.41189	1	1	1.81541	1	1	1	1.15935	1	1	1	1.16954	1	1	1	1	1	1	1	1.07235	1	1	1	1	1	1
CAIRO_HEPATOBLASTOMA_DN_Down	1.09727	1	1.34062	1	1	1.33448	1	1	1	1	1	1	1	1	1	1	1	1	1.41416	1	1	1	1	1	1.08923	1.01381	1	1	1	1	1	1.1775	1.02254	1	1.54311	1.54315	1	1	1	1	1	1	1.35602	1	1	1	1
CAIRO_HEPATOBLASTOMA_DN_Up	1	1	1	1	1.38019	1	1.6494	1.27764	1	1.98596	1.45721	1.69246	1	1.59095	1.01994	1.48255	1	1.65594	1	1.37544	1.09865	1.18132	1	1.20212	1	1	1.51809	1	1	1	1.67173	1	1	1	1	1	1.0717	1.42574	1.33977	1.09047	1.18621	1.42713	1	1.31791	1.36683	1.08618	1
CAIRO_HEPATOBLASTOMA_UP_Down	1.21511	1.2551	1	1.55462	1	1.21284	1	1.21283	1	1.34477	1.33958	1.44264	1.14277	1.19855	1.20582	1	1	1	1	1	1	1	1	1	1	1.24632	1	1.01539	1	1	1.17523	1	1	1.06384	1	1	1	1.49488	1.21384	1	1.61552	1.14004	1	1	1	1	1
CAIRO_HEPATOBLASTOMA_UP_Up	1	1	1	1	1	1	1	1	1	1	1	1	1	1	1	1	1	1	1	1.30503	1.13481	1	1	1	1	1	1	1	1	1	1	1	1	1	1.09785	1.01929	1	1	1	1	1	1	1	1	1	1	1
CAIRO_LIVER_DEVELOPMENT_DN_Down	1.30747	1	1.41917	1	1	1.2273	1	1	1.28188	1	1	1	1.01292	1	1	1	1	1	1.72335	1	1	1	1.03677	1.79779	1	1.14381	1	1	1	1	1	1	1	1.08643	1.11844	1	1	1	1	1.21548	1.17461	1.18427	1.42653	1	1	1	1.37196
CAIRO_LIVER_DEVELOPMENT_DN_Up	1	1	1	1	1.53573	1	1.73126	1.31558	1	1.85222	1.3259	1.60519	1	1.77571	1	1.9434	1	1.99122	1	1.86613	1.36362	1.60525	1	1	1.52663	1	1.61179	1	1.59005	1	1.4652	1.18048	1.22411	1	1	1.2343	1.05567	1.50035	1.16946	1	1	1	1	1.54958	1.22678	1.03058	1
CAIRO_LIVER_DEVELOPMENT_UP_Down	1.11128	1.06171	1	1.71284	1	1.45872	1	1	1.62315	1.25502	1.57495	1.77076	1	1	1	1.23924	1	1	1	1	1	1	1	1.09481	1	1.03757	1.07099	1	1	1.10579	1	1.1136	1	1.12635	1.48998	1	1	1	1	1	1.02276	1	1	1	1	1.31871	1.8163
CAIRO_LIVER_DEVELOPMENT_UP_Up	1	1	1	1	1	1	1.69909	1.06671	1	1	1	1	1	1.05427	1	1	1.49812	1.01179	1	1.55115	1.70088	1.20329	1	1	1.38996	1	1	1	1	1	1.76076	1	1	1	1	1.16896	1	1	1.18916	1.45786	1	1.10922	1	1.92533	1.40144	1	1
CAIRO_PML_TARGETS_BOUND_BY_MYC_UP_Down	1	1	1	1.4398	1.74605	1	1	1	1.05505	1.81028	1.88789	1.83992	1	1.33396	1	1	1	1	1.16901	1	1	1	1	1	1	1.5267	1.65381	1.04615	1	1	1	1	1	1	1	1	1	1	1	1	1.04957	1	1	1	1	1	1.08254
CAIRO_PML_TARGETS_BOUND_BY_MYC_UP_Up	1	1	1	1	1	1	1.28702	1.2856	1	1	1	1	1.2122	1	1	1	1.1675	1	1	1.49578	1.12336	1	1	1	1.4035	1	1	1	1.20545	1	1	1	1	1	1	1	1	1	1	1.01379	1	1	1	1.19539	1	1	1
CAMPS_COLON_CANCER_COPY_NUMBER_DN_Down	1	1.10386	1	1	1	1	1	1	1	1	1	1	1	1	1	1.39376	1	1.13868	1	1	1	1	1.11371	1.14432	1	1	1	1	1	1.10173	1	1	1	1	1	1	1	1	1	1	1.31451	1	1	1	1	1	1
CAMPS_COLON_CANCER_COPY_NUMBER_DN_Up	1	1	1.0603	1	1	1	1	1	1	1	1	1.05839	1	1	1	1	1	1	1.0855	1	1	1	1	1	1	1	1	1	1	1	1.00331	1	1	1	1	1	1	1	1	1	1	1	1.01529	1	1	1	1
CAMPS_COLON_CANCER_COPY_NUMBER_UP_Down	1	1	1	1.48357	1	1.24572	1	1	1	1	1	1	1	1.01499	1	1	1.42812	1	1	1	1	1	1	1	1	1	1	1	1	1.64194	1	1	1.4018	1	1	1	1	1	1	1.08699	1	1	1	1.06659	1	1.03846	1
CAMPS_COLON_CANCER_COPY_NUMBER_UP_Up	1	1	1	1	1	1	1	1	1.21503	1	1	1	1	1	1	1	1	1	1	1	1	1	1	1	1.10901	1	1	1.26539	1	1	1	1	1	1	1.02411	1.1605	1	1	1.03681	1	1	1	1	1	1	1	1
CARD_MIR302A_TARGETS_Down	1.22227	1.17125	1.15532	1.33061	1.71205	1.17751	1	1.33293	1.63332	2.04004	1.68597	1.58939	1.7466	1.97743	2.0425	1.21692	1	1.03326	1	1	1	1.99615	1	1	1	1	1.50038	1	1	1.43715	1	1	1.35003	1	1.04806	1	1	1.05795	1.25912	1	1.64823	1.13398	1.14946	1	1	1	1.04977
CARD_MIR302A_TARGETS_Up	1	1	1	1	1	1	1	1	1	1	1	1	1	1	1	1	1	1	1	1	1.0154	1	1	1.22913	1	1	1	1	1	1	1	1	1	1	1	1	1.04566	1	1	1.19769	1	1	1	1	1.16568	1	1
CASORELLI_ACUTE_PROMYELOCYTIC_LEUKEMIA_DN_Down	1	1	1	1.47892	1	1.04257	1.26072	1	1	1.53847	1	1.34111	1	1	1	1	1	1	1	1	1	1	1	1	1	1.10881	1.03617	1	1	1	1	1	1	1	1.18702	1.39279	1	1.62091	1	1	1	1	1	1	1	1	1
CASORELLI_ACUTE_PROMYELOCYTIC_LEUKEMIA_DN_Up	1	1	1	1	1	1	1	1	1	1	1.07378	1	1.61256	1.16955	1.49534	1	1.16516	1.46786	1	1	1	1.37989	1	1	1.47444	1	1	1	1	1.27651	1	1	1.519	1	1	1	1.09046	1	1.15396	1	1	1	1	1.10709	1	1	1
CASORELLI_ACUTE_PROMYELOCYTIC_LEUKEMIA_UP_Down	1.30881	1.25899	1.30436	1	1	1.21511	1	1.17421	1.13956	1	1.2043	1	1.29784	1.33184	1.36212	1	1	1	1	1	1	1	1	1	1	1	1	1	1	1.30551	1	1	1.53197	1	1.43333	1	1	1	1	1	1.65804	1.05194	1.30166	1	1	1	1.16429
CASORELLI_ACUTE_PROMYELOCYTIC_LEUKEMIA_UP_Up	1	1	1	1	1	1	1.30133	1	1	1	1	1.25495	1	1	1	1.44735	1	1.56969	1	1.43645	1.47217	1	1	1	1.24893	1	1	1	1.026	1	1.37667	1	1	1.1793	1	1.198	1.46344	1.75569	1	1.08158	1	1	1	1.22037	1	1	1
CASORELLI_APL_SECONDARY_VS_DE_NOVO_UP_Down	1.33624	1.15227	1.29093	1	1	1.05046	1	1	1.25833	1	1	1	1.38947	1	1	1	1	1	1	1	1	1	1.45981	1	1	1.35792	1	1	1	1	1	1	1.11386	1	1.09159	1	1	1	1	1	1.07372	1.07324	1.2819	1	1	1	1
CASORELLI_APL_SECONDARY_VS_DE_NOVO_UP_Up	1	1	1	1.42196	1.42794	1	1.44139	1.18635	1	1.44292	1	1.49167	1	1	1	1	1.39554	1.32675	1	1.5533	1.57844	1.02534	1	1	1	1	1.28674	1	1	1	1	1	1	1	1	1	1.14467	1.43543	1.05684	1	1	1	1	1.33344	1.09139	1.2983	1.31537
CASTELLANO_NRAS_TARGETS_UP_Down	1.83926	1.47343	2.13802	1.07399	1	1.38305	1	1	1.2202	1	1	1	1	1	1	1	1	1	1.46766	1	1	1	1.3144	1.00582	1	1.07508	1	1	1	1	1	1	1	1	1.60803	1.18114	1	1	1.05598	1	1.85894	1.29352	2.13427	1	1	1	1.79946
CASTELLANO_NRAS_TARGETS_UP_Up	1	1	1	1	1.03218	1	1.74419	2.09103	1	1.84417	1	1.52228	1	1.89053	1.41407	1	1.3931	1.3624	1	2.04887	1.65709	1.7973	1	1	1.17983	1	1.37907	1.29326	1.56883	1.54928	1.9154	1.2294	1	1	1	1	1.0177	2.07561	1	1.32452	1	1	1	1.76565	1.63268	1.40092	1
CEBALLOS_TARGETS_OF_TP53_AND_MYC_DN_Down	1	1	1	1	1.35219	1	1	1.0575	1	1.11254	1	1.19253	1	1.21548	1	1	1	1	1.23137	1	1	1	1	1	1	1	1	1	1	1.13611	1	1	1.05339	1.15655	1.063	1	1	1	1	1	1.0239	1	1	1	1	1	1.43363
CEBALLOS_TARGETS_OF_TP53_AND_MYC_DN_Up	1	1	1	1	1	1	1.24234	1	1	1	1	1	1	1	1	1	1.08044	1	1	1	1	1	1	1.44679	1.34771	1	1	1	1	1	1	1	1	1	1	1	1.29546	1	1.74082	1.15969	1	1	1	1.65033	1.5779	1.13331	1
CEBALLOS_TARGETS_OF_TP53_AND_MYC_UP_Down	1	1	1	1	1	1	1	1	1	1	1	1	1	1	1	1	1	1	1.03817	1	1	1	1	1	1.12616	1	1	1	1	1	1	1	1	1	1	1	1	1	1	1	1	1	1	1	1	1	1
CEBALLOS_TARGETS_OF_TP53_AND_MYC_UP_Up	1	1	1	1	1	1	1	2.03275	1	1.50452	1	1.53779	1	1	1	1	1.0645	1.00663	1	1.00509	1	1.05524	1	1	1	1	1	1.00485	1	1	1	1	1	1	1	1	1	1	1	1	1	1.12064	1	1.42401	1.09729	1	1
CERIBELLI_GENES_INACTIVE_AND_BOUND_BY_NFY_Down	1	1	1	1	1	1	1	1	1	1	1	1	1	1	1	1.1494	1	1.08905	1	1	1	1.05145	1	1	1	1	1	1	1	1	1	1	1	1	1	1	1	1	1	1	1	1	1	1	1	1	1
CERIBELLI_GENES_INACTIVE_AND_BOUND_BY_NFY_Up	1	1	1	1	1	1	1	1	1	1.54377	1.72155	1.00877	1	1.07692	1	1	1	1	1	1	1	1	1	1	1	1	1.41138	1.60363	1	1	1	1	1	1	1	1	1	1	1	1	1	1.08608	1	1	1	1	1
CERVERA_SDHB_TARGETS_1_DN_Down	1	1	1	1	1	1	1	1	1	1	1.14731	1	1	1	1.03232	1.18155	1	1.63904	1	1	1	1	1	1.19228	1	1.45672	1	1	1	1.35479	1	1.47356	1	1.13531	1	1	1	1	1	1	1.77231	1.15259	1	1.1301	1	1	1
CERVERA_SDHB_TARGETS_1_DN_Up	1	1	1	1	1.32685	1	1	1	1.23005	1.73964	1	1.82873	1	1.07169	1	1	1	1	1	1.22119	1.00916	1	1	1	1	1	1	1	1.29186	1	1	1	1	1	1	1	1	1	1	1	1	1	1	1	1.03652	1.09909	1
CERVERA_SDHB_TARGETS_1_UP_Down	1.47719	1.16921	1.49462	1	1	1	1	1.4618	1	1	1.11529	1.26844	1.641	1	1.27587	1.19702	1	1	1.3933	1	1	1	1.33401	2.04253	1	1.46106	1	1.42443	1.17913	1	1	1.74595	1	1.49582	1.86586	1.3172	1	1	1.54079	1	1.61403	1.23302	1.49505	1	1	1	1.31611
CERVERA_SDHB_TARGETS_1_UP_Up	1	1	1	1.30444	1.5152	1.63108	1.61405	1	1	1.1078	1	1	1	1	1	1	1.5378	1.50728	1	1.77712	1.36538	1.05544	1	1	1	1	1.44414	1	1	1	1	1	1.0346	1	1	1	1	1.17406	1	1.06498	1	1	1	1.58626	1.58949	1	1
CERVERA_SDHB_TARGETS_2_Down	1.00105	1	1.0761	1	1	1	1	1.03994	1	1	1.26331	1	1.63525	1	1.05714	1	1	1	1.67608	1	1.07855	1	1.08436	1.6152	1	1	1	1	1	1.19627	1	1	1	1.08187	1.34916	1.3218	1	1	1.40523	1	1.80529	1.13213	1.08635	1	1	1	1.51474
CERVERA_SDHB_TARGETS_2_Up	1	1	1	1.88766	1.33322	1.80482	1.76702	1	1	1.09384	1	1.26197	1	1.24842	1	1.36089	1.2242	1.49767	1	1.73299	1	1.08966	1	1	1.16093	1	1.04588	1	1.14798	1	1.19393	1.33525	1.35103	1	1	1	1.22109	1.47653	1	1.5879	1	1	1	1.58875	1.29456	1.25656	1
CHANDRAN_METASTASIS_DN_Down	1.25166	1.11312	1.32976	1	1	1.57207	1	1	1.02255	1	1	1	1.48116	1	1.12752	1.10525	1	1	1.40123	1	1	1	1.3012	1.35055	1	1.12788	1	1	1	1.18043	1	1.28618	1	1.00183	1.66365	1.27018	1	1	1	1	1.53661	1	1.34297	1	1	1	1.43261
CHANDRAN_METASTASIS_DN_Up	1	1	1	1.52921	1.29074	1	1.74937	1.1536	1	1.70015	1	1	1	1.00641	1	1	1.40441	1.4163	1	1.7143	1.43938	1.07049	1	1	1.31965	1	1.35767	1	1.09683	1	1.7759	1	1.45775	1	1	1	1.06522	1.24069	1.49366	1.30046	1	1.03843	1	1.55544	1.40065	1.27	1
CHANDRAN_METASTASIS_TOP50_DN_Down	1.49439	1.25024	1.6575	1	1	1.36954	1	1	1	1	1	1.18151	1	1	1	1	1	1	1.314	1	1	1	1.50987	1.77167	1	1.07449	1	1.07953	1	1	1	1	1	1	1.20023	1.5616	1	1	1	1	1	1	1.64666	1	1	1	1.1358
CHANDRAN_METASTASIS_TOP50_DN_Up	1	1	1	1.03182	1	1	1.03868	1.16617	1	1.12288	1.33284	1	1.31658	1.46194	1.44398	1.32062	1	1.30198	1	1.46572	1.00607	1.54093	1	1	1	1	1.43493	1	1	1	1.41923	1	1.55927	1	1	1	1	1	1	1	1	1	1	1.18041	1	1	1
CHANDRAN_METASTASIS_TOP50_UP_Down	1	1	1	1.43843	1.6748	1	1	1.18581	1	1.20424	1	1	1	1	1	1	1	1.63707	1	1	1	1	1	1	1	1	1.01347	1	1	1.8075	1.19062	1	1	1	1	1	1	1.42355	1	1	1.15423	1	1	1	1	1	1.42483
CHANDRAN_METASTASIS_TOP50_UP_Up	1	1	1	1	1	1	1	1	1	1	1	1	1	1	1	1	1	1	1	1	1	1	1	1.0036	1	1	1	1	1	1	1	1	1	1	1	1	1.47811	1	1	1	1	1	1	1	1	1	1
CHANDRAN_METASTASIS_UP_Down	1	1	1	1	1	1.355	1	1.63113	1.18323	1.58949	1.34689	1.3731	1.37472	1.88259	1.65362	1	1	1.08406	1	1	1	1.655	1	1	1	1	1.04314	1	1	1.85047	1.15584	1	1.36672	1	1	1	1	1	1	1	1.15678	1	1	1	1	1	1.18735
CHANDRAN_METASTASIS_UP_Up	1	1	1	1	1	1	1	1	1	1	1	1	1	1	1	1	1	1	1	1.14206	1.05347	1	1	1	1.0638	1	1	1	1	1	1	1	1	1	1	1.35772	1.34198	1	1.08975	1	1	1	1	1	1	1	1
CHANG_CORE_SERUM_RESPONSE_DN_Down	1.62732	1.56732	1.34752	1	1	1.09965	1	1.20662	1.80291	1.10232	1.06535	1.0831	1.60757	1.41354	1.54954	1	1.1478	1	1.05977	1	1	1.22625	1	1	1	1.01306	1	1	1	1.09856	1	1.00804	1.04576	1.118	1	1	1	1	1	1	1.014	1	1.36857	1	1	1	1.63412
CHANG_CORE_SERUM_RESPONSE_DN_Up	1	1	1	1	1	1	1.5526	1	1	1	1	1	1	1	1	1.45118	1	1.18519	1	1.34287	1.12337	1	1	1	1	1	1.10109	1	1	1	1.14133	1	1	1	1	1	1	1.51005	1.44405	1.06905	1	1	1	1.70667	1.48967	1.12201	1
CHANG_CORE_SERUM_RESPONSE_UP_Down	1	1	1	1.07545	1.14896	1	1	1	1	1	1.70872	1	1	1	1	1	1	1	1	1	1	1	1	1	1	1.05139	1.12365	1	1	1	1	1	1	1	1	1.14455	1	1.52706	1.39839	1	1	1	1	1	1	1	1
CHANG_CORE_SERUM_RESPONSE_UP_Up	1	1	1	1	1	1	1	1.57229	1	1	1	1	2.10493	1.61393	1.97017	1	1	1	1	1	1	1.7395	1	1	1.27654	1	1	1	1.14004	1.13763	1	1	1	1	1	1	1	1	1	1	1.13478	1	1	1	1	1	1.13329
CHANG_CYCLING_GENES_Down	1	1	1	2.70248	2.58826	2.33688	1	1	1	2.58477	2.30048	2.42298	1	1.86687	1	1	1	1.05556	1	1.30868	1.21825	1.12664	1	1	1	1	1	1	1	1	1	1.12056	1	1.0366	1.22789	1.22878	1	2.39121	1.9335	1	1	1	1	1	1.25681	1	1
CHANG_CYCLING_GENES_Up	1.45757	1.01854	1.73842	1	1	1	1	1.4104	1.22458	1	1	1	1.57385	1	1	1	1	1	1	1	1	1	1.21359	1.21541	2.78051	1	1	1.79171	1.52246	1.33764	1	1	1.54199	1	1	1	1	1	1	1	1	1	1.73445	1	1	1.26355	1
CHANG_IMMORTALIZED_BY_HPV31_DN_Down	1	1	1	1.31351	1	1.3055	1	1.37139	1.00881	1	1	1	1.14617	1.03893	1.15462	1	1	1	1	1	1	1	1.229	1	1.27868	1	1	1	1	1.11606	1	1.31018	1	1	1.53981	1.63683	1	1	1	1	1.81978	1.20415	1	1	1	1	1
CHANG_IMMORTALIZED_BY_HPV31_DN_Up	1	1	1	1	1.52376	1	1.31698	1	1	1	1	1.44855	1	1	1	1.14956	1	1.75422	1.42564	1.41456	1.38962	1	1	1	1	1	1	1	1	1	1.26929	1	1.58068	1	1	1	1.28253	1.80934	1.33117	1.41464	1	1	1	1.59641	1.49666	1.26257	1
CHANG_IMMORTALIZED_BY_HPV31_UP_Down	1	1.00858	1	1	1	1	1	1	1.23283	1	1	1	1.39914	1	1.11584	1	1	1	1	1	1	1	1	1.12078	1	1	1.13485	1	1	1.24847	1	1	1.01102	1	1.31405	1.2509	1	1	1	1	1	1	1	1	1	1	1
CHANG_IMMORTALIZED_BY_HPV31_UP_Up	1	1	1	1	1	1	1.54146	1	1	1	1	1	1	1	1	1	1.12707	1.0271	1	1.56417	1.69558	1.13346	1	1	1.00801	1	1	1	1.44495	1	1.71893	1	1	1	1	1	1	1.01014	1	1.09697	1	1	1	1.165	1.21628	1.08073	1
CHANGOLKAR_H2AFY_TARGETS_DN_Down	1	1.01885	1	1	1	1.51364	1	1.23553	1	1	1.07277	1	1	1	1	1	1	1	1	1	1	1	1	1	1	1	1	1	1	1.48748	1	1	1	1.11794	1	1	1	1	1.48908	1	1.55059	1.22908	1	1	1.0496	1	1.36069
CHANGOLKAR_H2AFY_TARGETS_DN_Up	1	1	1	1.22821	1.23284	1	1	1	1	1	1	1	1	1	1	1.18935	1	1	1.05028	1.69193	1.79401	1	1	1.03885	1.61678	1	1	1.38759	1	1	1.39594	1	1	1	1	1.40038	1	1.33758	1	1	1	1	1	1	1	1	1
CHANGOLKAR_H2AFY_TARGETS_UP_Down	1	1.18117	1	1	1	1	1	1	1	1	1	1	1.03054	1.25703	1.22968	1	1	1	1.0832	1	1.15313	1.48002	1	1	1	1	1	1	1	1.17202	1	1	1.17489	1	1	1	1	1	1.01235	1	1	1	1	1	1.24246	1	1
CHANGOLKAR_H2AFY_TARGETS_UP_Up	1	1	1	1	1	1	1	1	1	1	1	1	1	1	1	1	1	1	1	1	1	1	1	1	1	1	1	1	1	1	1	1	1	1	1.17939	1.33405	1	1	1	1	1	1	1	1	1	1	1
CHARAFE_BREAST_CANCER_BASAL_VS_MESENCHYMAL_DN_Down	1	1	1	1.38523	1	1	1	1.12809	1.08525	1	1.45096	1	1.61352	1.03075	1	1	1	1	1	1	1	1	1.20174	1.24904	1.12121	1	1	1.01357	1	1.40789	1.35621	1	1	1	1	1	1	1	1	1	1	1	1	1	1	1	1
CHARAFE_BREAST_CANCER_BASAL_VS_MESENCHYMAL_DN_Up	1	1	1	1	1	1	1.23702	1	1	1	1	1	1	1	1.0039	1.36458	1.09862	1.57133	1.07195	1.81125	1.76523	1.45213	1	1	1	1	1	1	1	1	1	1.06545	1	1	1.02032	1.31947	1.02024	1	1	1	1	1	1	1.33687	1.0648	1	1.45091
CHARAFE_BREAST_CANCER_BASAL_VS_MESENCHYMAL_UP_Down	1.08202	1.33512	1	1	1	1	1	1	1.37476	1	1	1	1	1	1	1	1.58405	1	1.90733	1	1.64407	1	1	1.39525	1	1	1.1889	1	1	1	1.01538	1.17969	1	1	1.35472	1.32146	1	1	1	1	1	1	1	1	1	1	1.10098
CHARAFE_BREAST_CANCER_BASAL_VS_MESENCHYMAL_UP_Up	1	1	1	1.73324	1.68397	1.1835	2.11407	1.12974	1	1.54246	1.17185	1.61069	1	1.38567	1.11321	1.37083	1	1.22651	1	1.44761	1	1	1.2773	1	1.36452	1	1	1.00838	1	1.06332	1	1	1.35255	1	1	1	1	1.69521	1.21474	1.09452	1	1.0271	1	1.90717	1.4983	1.48333	1
CHARAFE_BREAST_CANCER_LUMINAL_VS_BASAL_DN_Down	1.02983	1	1.20017	1.09932	1	1.34296	1	1	1.38821	1	1	1	1.73824	1	1.34951	1	1	1	1.43542	1	1	1	1	1	1	1.00191	1	1	1	1.0227	1	1	1.25415	1.16332	1	1	1	1	1	1	2.10107	1.28142	1.18456	1	1	1	1.35154
CHARAFE_BREAST_CANCER_LUMINAL_VS_BASAL_DN_Up	1	1	1	1	1.12222	1	1.96815	1.29607	1	1.54651	1	1.1453	1	1	1	1.06136	1.10879	1.48857	1	1.69853	1.37231	1	1	1.10941	1	1	1	1	1	1	1.50506	1.0409	1	1	1.178	1.15098	1.24572	2.09966	1.24605	1.36541	1	1	1	1.85704	1.45542	1.42057	1
CHARAFE_BREAST_CANCER_LUMINAL_VS_BASAL_UP_Down	1	1	1	1	1	1.14774	1	1.34677	1	1	1	1.50813	1.16362	1.23466	1.34805	1	1.41236	1.07477	1.25159	1	1.26539	1.66413	1	1.33444	1	1	1	1.00998	1.63285	1.52966	1	1	1	1	1	1	1	1.17778	1	1.17721	1	1.01855	1	1	1	1	1.17032
CHARAFE_BREAST_CANCER_LUMINAL_VS_BASAL_UP_Up	1	1.01421	1	1.02804	1	1	1	1	1	1	1	1	1	1	1	1.07762	1	1	1	1	1	1	1	1	1	1	1.04182	1	1	1	1	1	1.15572	1	1	1.14291	1.14607	1	1.07983	1	1	1	1	1	1	1	1
CHARAFE_BREAST_CANCER_LUMINAL_VS_MESENCHYMAL_DN_Down	1	1	1.23591	1.43664	1	1.38608	1	1	1.68059	1.09954	1.64869	1.30928	1.80244	1.1292	1.39187	1	1	1	1.01186	1	1	1	1	1	1	1.31251	1	1	1	1.49674	1	1	1.24398	1.10628	1.13357	1	1	1	1	1	1.51286	1	1.23236	1	1	1	1.64277
CHARAFE_BREAST_CANCER_LUMINAL_VS_MESENCHYMAL_DN_Up	1	1	1	1	1	1	1.92239	1	1	1	1	1	1	1	1	1	1.3201	1.40067	1	1.83326	1.97773	1.17514	1	1.04708	1.35536	1	1	1	1	1	1.76733	1	1	1	1	1.28629	1.39262	1.85098	1	1.60622	1	1	1	2.01276	1.53995	1.17968	1
CHARAFE_BREAST_CANCER_LUMINAL_VS_MESENCHYMAL_UP_Down	1	1	1.12284	1	1	1	1	1	1	1	1	1	1	1	1	1	1.45371	1	1.59896	1	1.57847	1	1	1.44005	1	1	1	1	1.17222	1.24665	1	1.14788	1	1	1.09337	1.15645	1	1	1	1.3	1	1	1.13054	1	1	1	1
CHARAFE_BREAST_CANCER_LUMINAL_VS_MESENCHYMAL_UP_Up	1.0922	1.16015	1	1.49553	1.27606	1	1.50628	1	1	1.50156	1.35497	1	1.08426	1	1.12139	1.26695	1	1	1	1.19614	1	1	1	1	1	1.075	1.28425	1	1	1	1	1	1	1	1	1	1.26715	1.04034	1.56263	1	1.22193	1.12321	1	1.1772	1.046	1	1
CHAUHAN_RESPONSE_TO_METHOXYESTRADIOL_DN_Down	1.1464	1	1.71493	1	1	1	1	1	1	1	1.32663	1	1	1	1	1	1	1	1	1	1	1	1	1	1	1.06922	1	1	1	1	1	1	1	1	1.14404	1	1	1	1	1	1	1	1.69248	1	1	1	1
CHAUHAN_RESPONSE_TO_METHOXYESTRADIOL_DN_Up	1	1	1	1	1	1.05173	1.30348	1.83352	1	1.41963	1	1.19396	1.94212	1.7405	2.01405	1	1	1	1	1.4506	1.41656	1.91631	1	1	1.27511	1	1.04352	1	1	1	1	1	1	1	1	1	1	1	1.00716	1	1	1	1	1.35412	1	1	1
CHAUHAN_RESPONSE_TO_METHOXYESTRADIOL_UP_Down	1	1	1.35143	1	1	1	1	1	1.28868	1.18815	1.40331	1	1	1	1	1	1.09283	1	1	1.48747	1.00977	1	1	1.03989	1	1.22381	1	1.35526	1	1	1	1	1	1	1.19988	1	1	2.4187	1	1	1	1	1.38868	1	1	1	1
CHAUHAN_RESPONSE_TO_METHOXYESTRADIOL_UP_Up	1	1.12323	1	1	1	1	1	1	1	1	1	1	1.78842	1.28012	1.67985	1.01775	1	1	1	1	1	1.23225	1	1	1	1	1	1	1	1	1	1	1	1	1	1	1	1	1	1	1	1	1	1.08981	1	1	1
CHEBOTAEV_GR_TARGETS_DN_Down	1	1	1	1.54981	1	1.60794	1	1.42336	1.54407	1	1.281	1	1.77956	1	1.14288	1	1	1	1	1	1	1	1.60342	1	1.52929	1.26492	1	1.44015	1	1.2956	1	1.03526	1	1.09542	1.39374	1.25577	1	1.04912	1	1	1.52307	1.08324	1	1	1	1	1.60212
CHEBOTAEV_GR_TARGETS_DN_Up	1	1	1	1	1.10418	1	1.53318	1	1	1	1	1	1	1.04635	1	1.05767	1	1.01095	1.28211	1.46745	1.66195	1.09093	1	1	1	1	1	1	1	1	1.47903	1	1	1	1	1	1	1	1.47344	1.62217	1	1	1	1.36089	1.25162	1.17823	1
CHEBOTAEV_GR_TARGETS_UP_Down	1.00618	1.17263	1.27827	1.05196	1	1.02842	1	1.21148	1.03123	1.17996	1.02136	1	1.97461	1.28026	1.68962	1	1	1	1.23489	1	1	1.54443	1.48767	1.09989	1	1	1	1.09724	1.23934	1.19289	1	1	1.09766	1.41841	1	1	1.03415	1	1	1	1.71315	1.31125	1.26842	1	1	1	1
CHEBOTAEV_GR_TARGETS_UP_Up	1	1	1	1	1	1	1.41612	1	1	1	1	1	1	1	1	1	1	1.1079	1	1.11532	1	1	1	1	1	1	1.29719	1	1	1	1.06033	1.1106	1	1	1.37282	1.07875	1	1	1.25678	1	1	1	1	1.48645	1.34691	1.01743	1.12217
CHEMELLO_SOLEUS_VS_EDL_MYOFIBERS_UP_Down	1	1	1	1	1	1	1	1	1	1	1	1	1	1	1	1	1	1	1	1	1	1	1	1	1	1	1	1	1	1	1	1	1	1	1	1	1	1	1	1	1	1	1	1	1	1	1
CHEMELLO_SOLEUS_VS_EDL_MYOFIBERS_UP_Up	1	1	1	1	1	1	1	1	1	1	1	1	1	1	1	1	1.11584	1	1	1	1	1	1	1	1	1	1	1	1	1	1	1	1	1	1	1	1	1	1	1	1	1	1	1	1	1	1
CHEMNITZ_RESPONSE_TO_PROSTAGLANDIN_E2_DN_Down	1	1	1	1	1	1.27188	1	1.2425	1	1	1	1	1.56566	1	1.27819	1	1	1	1.69393	1	1.42871	1.28105	1	1.11338	1	1.05705	1	1.04692	1	1.30375	1	1	1.04854	1	1	1	1	1	1	1	1.28409	1.03507	1	1	1	1	1.21482
CHEMNITZ_RESPONSE_TO_PROSTAGLANDIN_E2_DN_Up	1	1	1	1.41891	1.14135	1	1.40026	1	1	1	1	1	1	1	1	1.01177	1	1	1	1.23597	1	1	1.063	1	1.00685	1	1	1	1	1	1.01949	1	1	1.14193	1.04719	1.06358	1.17898	1.45012	1.28875	1.17363	1	1	1	1.37613	1.13759	1.13055	1
CHEMNITZ_RESPONSE_TO_PROSTAGLANDIN_E2_UP_Down	1	1	1	2.03159	1.71822	1.34693	1	1	1	2.02258	1.8737	1.92482	1	1.40712	1	1	1	1	1	1	1	1	1	1	1	1.41824	1	1	1	1.03864	1	1	1	1	1	1.33885	1	1.97566	1.18068	1.44741	1	1.03119	1	1	1	1	1
CHEMNITZ_RESPONSE_TO_PROSTAGLANDIN_E2_UP_Up	1	1.05855	1	1	1	1	1	1	1.0155	1	1	1	1.51016	1	1	1	1	1	1	1	1	1	1	1	1.88638	1	1	1	1.17107	1	1	1	1.01834	1	1	1	1	1	1	1	1	1	1	1	1	1.33081	1
CHEN_HOXA5_TARGETS_9HR_DN_Down	1.01663	1	1.11215	1.83938	1.64829	1.22559	1	1	1	1	1.19933	1.1376	1	1	1	1	1	1	1	1	1	1	1	1	1	1.13746	1	1	1	1	1	1	1.07522	1	1.63106	1	1	1.82252	1.60559	1	1	1	1.1147	1	1	1	1.19144
CHEN_HOXA5_TARGETS_9HR_DN_Up	1	1	1	1	1	1	1.21888	1.64326	1	1	1	1	1.33246	1.20425	1.172	1	1	1	1	1.63719	1.62506	1.51339	1	1	1.56323	1	1	1	1	1	1	1	1	1.15957	1	1	1	1	1	1	1	1	1	1	1	1	1
CHEN_HOXA5_TARGETS_9HR_UP_Down	1.64181	1.72878	1.36303	1.05294	1	1.553	1	1.43115	1.98478	1.65217	1.88674	1	1.27646	1.81871	1.72783	1	1	1	1	1.03709	1	1.62519	1	1	1	1	1.16171	1	1	1.13346	1.03066	1	1.06522	1	1	1.08845	1	1	1	1	1.71864	1.38477	1.34177	1	1	1	1
CHEN_HOXA5_TARGETS_9HR_UP_Up	1	1	1	1	1	1	1	1	1	1	1	1	1	1	1	1	1	1	1	1	1	1	1	1	1	1	1	1	1	1	1	1	1	1.04542	1	1	1	1	1.02399	1	1	1	1	1.00417	1.2346	1	1.06963
CHEN_LIVER_METABOLISM_QTL_CIS_Down	1.02539	1.33312	1	1	1	1	1	1	1	1	1	1	1	1	1	1	1	1	1.0149	1	1	1	1.0876	1.21395	1	1	1	1	1	1	1	1	1	1	1	1	1	1.12203	1	1	1	1	1	1	1	1	1
CHEN_LIVER_METABOLISM_QTL_CIS_Up	1	1	1	1.46178	1	1	1.37049	1	1	1	1	1	1.11743	1	1	1	1	1	1	1.41216	1.11374	1	1	1	1	1	1	1	1	1	1.42283	1	1	1	1	1	1	1	1	1	1	1	1	1	1	1.08074	1
CHEN_LUNG_CANCER_SURVIVAL_Down	1	1	1	1	1	1	1	1	1	1	1	1	1	1	1	1	1	1	1.42762	1	1	1	1	1	1	1	1.25652	1	1	1	1	1	1	1	1	1	1	1	1	1	1	1	1	1	1	1	1
CHEN_LUNG_CANCER_SURVIVAL_Up	1	1	1	1	1	1	1.32368	1	1	1.55383	1	1	1.45713	1.8126	1.72318	1	1	1	1	1.81509	1	1.58897	1	1	1	1	1	1.11838	1.16739	1	1	1	1	1	1	1	1	1	1	1	1.02272	1	1	1.30356	1.19944	1	1
CHEN_LVAD_SUPPORT_OF_FAILING_HEART_DN_Down	1	1	1	1	1	1.0228	1	1	1.42913	1	1	1.24077	1	1	1	1	1	1	1.38166	1	1	1	1	1	1.15096	1.27675	1	1	1	1.2381	1.1633	1.06058	1	1	1	1.07859	1.52364	1	1	1	1.75761	1.48533	1	1	1	1	1.19072
CHEN_LVAD_SUPPORT_OF_FAILING_HEART_DN_Up	1	1	1	1	1.27133	1	1.73186	1	1	1.18423	1	1	1	1.34337	1	1	1.72727	1.71223	1	1.62825	1	1.4807	1.06951	1	1	1	1	1	1.06842	1	1	1	1	1	1	1	1	1	1	1.08044	1	1	1	1.372	1.24319	1	1
CHEN_LVAD_SUPPORT_OF_FAILING_HEART_UP_Down	1.05601	1	1.55469	1	1	1.43872	1	1	1.2658	1	1.38457	1	1.52229	1.64956	1.69371	1	1.1001	1	1	1	1	1	1	1	1	1	1	1	1	1.29023	1	1	1.62812	1	1	1.19273	1	1	1	1	1.8942	1.6366	1.54049	1	1	1	1.34278
CHEN_LVAD_SUPPORT_OF_FAILING_HEART_UP_Up	1	1.03546	1	1.48382	1.25468	1	1.67614	1.9446	1	1.34039	1	1.64254	1	1	1	1.69503	1	1.58794	1	1.71026	1.60791	1	1	1.0408	1.31147	1	1.05416	1	1	1	1	1	1	1.39793	1.52015	1	1	1.28983	1.02836	1.22845	1	1	1	1.75707	1.36763	1	1
CHEN_METABOLIC_SYNDROM_NETWORK_Down	1.20906	1	1.40732	1	1	1.37567	1	1	1.1199	1	1	1	1	1	1	1	1	1	1.28353	1	1	1	1.38882	1.30617	1	1.37994	1	1.11873	1	1	1	1	1	1.20659	1.56154	1.08241	1	1	1.22436	1	1.10063	1.09238	1.39943	1	1	1	1.10499
CHEN_METABOLIC_SYNDROM_NETWORK_Up	1	1.07425	1	1.50674	1.33012	1	1.91055	1.53972	1	1.90657	1.36198	1	1.01412	1.92472	1.42162	1.31558	1.18358	1.44046	1	1.53504	1.4826	1.66581	1	1	1.10411	1	1.38903	1	1.04805	1.13881	1.74971	1.15372	1.62722	1	1	1	1	1.96499	1	1.07614	1	1	1	1.82411	1.44019	1.11049	1
CHEN_NEUROBLASTOMA_COPY_NUMBER_GAINS_Down	1.1004	1.26291	1	1	1	1	1	1.05964	1	1.63364	1.37047	1.41506	1.14424	1	1.13034	1	1	1	1	1	1	1	1	1.01733	1	1.18933	1	1	1	1.07349	1	1.2862	1	1	1	1	1	1.4943	1	1	1.25891	1.37087	1	1	1	1.06034	1.804
CHEN_NEUROBLASTOMA_COPY_NUMBER_GAINS_Up	1	1	1	1	1.10481	1	1	1	1	1	1	1	1	1	1	1.00645	1.16475	1.38769	1	1.27389	1.2953	1	1.20512	1	1	1	1	1	1	1	1.28651	1	1	1	1	1	1.08475	1	1	1	1	1	1	1.1367	1	1	1
CHENG_IMPRINTED_BY_ESTRADIOL_Down	1.16889	1.01766	1.14649	1	1	1.31955	1	1	1	1.1105	1	1.4889	1	1.51095	1.20899	1	1	1	1.13275	1	1	1.04848	1	1	1	1	1.4293	1	1	1.42937	1.1208	1.43485	1	1	1	1	1.25626	1.28203	1	1	1	1	1.14536	1	1	1	1.21146
CHENG_IMPRINTED_BY_ESTRADIOL_Up	1	1	1	1	1	1	1	1	1.12403	1	1	1	1	1	1	1	1.00785	1	1	1.07287	1	1	1.30678	1	1.53507	1	1	1	1	1	1	1	1	1	1	1	1	1	1.07412	1	1	1	1	1.03246	1.58436	1.1223	1
CHENG_RESPONSE_TO_NICKEL_ACETATE_Down	1	1	1	1.02133	1	1	1	1	1.00569	1.07817	1.45862	1.31095	1	1	1	1	1	1	1	1	1	1	1	1	1	1	1	1	1	1	1	1	1	1	1	1.11582	1	1	1	1	1	1	1	1	1	1	1.26395
CHENG_RESPONSE_TO_NICKEL_ACETATE_Up	1	1	1	1	1	1	1.15518	1.36922	1	1	1	1	1.76786	1.08403	1.48983	1.0699	1	1.5839	1	1	1	1.66072	1	1	1.01655	1	1	1	1	1	1	1	1	1	1	1	1	1	1	1.54733	1	1.17004	1	1	1.14378	1	1
CHEOK_RESPONSE_TO_HD_MTX_DN_Down	1	1.35242	1	1.33021	1.64466	1	1	1	1	1	1	1	1.01041	1	1.01529	1	1	1	1	1	1	1	1	1	1	1	1	1	1	1	1	1	1	1	1	1	1	1	1	1	1	1	1	1.40393	1	1	1
CHEOK_RESPONSE_TO_HD_MTX_DN_Up	1	1	1	1	1	1	1	1	1	1	1	1	1	1	1	1	1	1	1	1.04268	1	1	1.35694	1	1.10038	1	1	1	1	1	1	1	1	1	1	1.17244	1.205	1	1	1	1	1	1	1	1	1	1
CHESLER_BRAIN_HIGHEST_EXPRESSION_Down	1.37112	1.52816	1.25354	1	1.53611	1	1	1.23964	1	1	1	1	1	1	1	1	1	1.08836	1	1	1.02542	1	1.15769	1	1.11701	1	1	1	1	1	1	1	1	1	1	1.05068	1	1	1	1	1.1623	1	1.23237	1.1918	1	1	1
CHESLER_BRAIN_HIGHEST_EXPRESSION_Up	1	1	1	1	1	1.40949	1	1	1	1	1	1.17393	1.00312	1.02548	1	1	1	1	1	1.1315	1	1	1	1	1	1	1	1	1	1	1	1	1.15244	1	1	1	1	1.33244	1	1.08496	1	1	1	1	1	1.12636	1
CHESLER_BRAIN_HIGHEST_GENETIC_VARIANCE_Down	1	1	1	1	1	1	1	1	1	1	1.17638	1	1	1	1	1.04659	1	1	1	1	1	1	1	1	1	1	1	1	1	1	1	1.0852	1	1	1.72687	1.2479	1	1	1	1	1	1	1	1.30004	1.42763	1	1
CHESLER_BRAIN_HIGHEST_GENETIC_VARIANCE_Up	1.0002	1.11261	1	1	1	1	1	1	1	1.03579	1	1.09511	1.5243	1.01584	1.21459	1	1	1	1.23924	1	1.01686	1.16351	1	1.12741	1	1.51551	1.11149	1.56413	1	1	1.13231	1	1	1	1	1	1	1.28311	1.55775	1	1.13899	1.36995	1	1	1	1	1
CHESLER_BRAIN_QTL_CIS_Down	1	1	1	1	1.06536	1	1	1	1	1	1	1	1	1.11315	1.00884	1.36241	1	1	1	1	1	1.14027	1	1.02389	1	1	1	1	1	1	1	1	1	1	1.09814	1	1	1	1	1	1	1	1	1.08366	1.3836	1	1
CHESLER_BRAIN_QTL_CIS_Up	1	1	1	1	1	1	1	1	1.41192	1.03554	1	1.11089	1.06548	1	1	1	1.0067	1	1	1	1	1	1	1	1	1.18176	1.03477	1	1	1	1	1	1.18502	1	1	1	1	1.09081	1.35911	1.37321	1	1.5758	1	1	1	1	1
CHIANG_LIVER_CANCER_SUBCLASS_CTNNB1_DN_Down	1.26836	1.02788	1.40035	1	1	1.2485	1	1	1.55849	1	1	1.18369	1.84583	1	1.15441	1	1	1	1.27935	1	1	1	1.09714	1.25312	1	1.14086	1	1	1	1.4966	1	1.35342	1	1	2.01117	1.08216	1	1	1	1	1.12458	1	1.37859	1	1	1	1.12568
CHIANG_LIVER_CANCER_SUBCLASS_CTNNB1_DN_Up	1	1	1	1.79846	1.68186	1	2.01785	1.35835	1	1.72113	1.41645	1	1	1.5687	1	1.36134	1.38317	1.85083	1	2.02414	2.06535	1.96972	1	1	1.41339	1	1.75277	1.17121	1.32087	1	2.08615	1	1.36072	1.25661	1	1	1.09252	2.15218	1.65825	1.5662	1	1.45601	1	2.10111	1.88384	1.2451	1
CHIANG_LIVER_CANCER_SUBCLASS_CTNNB1_UP_Down	1.56148	1.39014	1.63492	1	1	1	1	1	1	1	1	1	1.60273	1	1	1	1	1	1.31203	1	1	1	1	1.57088	1.3103	1.03006	1	1.35309	1	1	1	1	1.04531	1	1	1	1	1	1	1	1.55777	1.33878	1.64938	1	1	1	1.7532
CHIANG_LIVER_CANCER_SUBCLASS_CTNNB1_UP_Up	1	1	1	1.0163	1.36692	1.05899	1.38385	1	1	1.49448	1	1.34687	1	1.44553	1	1.47434	1	1.37368	1	1.66891	1.3318	1.22394	1.07454	1	1	1	1.06856	1	1.15749	1.05781	1.50572	1	1	1	1	1	1.26241	1	1.34628	1.34315	1	1	1	1.1376	1.41523	1.48543	1
CHIANG_LIVER_CANCER_SUBCLASS_INTERFERON_DN_Down	1.16654	1.34232	1.07013	1.09261	1	1.4537	1	1	1.35376	1	1.17578	1.14592	1.60696	1	1	1	1.08441	1	1.06005	1	1	1	1.05234	1	1	1	1	1.17531	1	1	1	1	1.83443	1	1.28681	1	1	1	1	1.07013	1	1	1.10506	1	1	1.00228	1.39855
CHIANG_LIVER_CANCER_SUBCLASS_INTERFERON_DN_Up	1	1	1	1	1.16035	1	1.35083	1	1	1	1	1	1	1.10424	1	1.14139	1	1	1	1.31241	1.01531	1	1	1	1	1	1	1	1	1	1.42343	1	1	1.37659	1	1.32201	1	1	1	1	1	1	1	1	1.04544	1	1
CHIANG_LIVER_CANCER_SUBCLASS_POLYSOMY7_DN_Down	1	1	1	1	1	1	1	1	1	1	1	1	1	1	1	1	1	1	1	1	1	1.56469	1	1	1	1	1	1	1	1	1	1	1	1	1	1	1	1	1	1	1	1	1	1	1	1	1
CHIANG_LIVER_CANCER_SUBCLASS_POLYSOMY7_DN_Up	1	1	1	1	1	1	1	1	1	1	1	1	1	1	1	1	1.10382	1	1	1	1	1	1	1	1	1	1	1	1	1	1	1	1	1	1	1	1	1	1	1	1	1	1	1	1	1	1
CHIANG_LIVER_CANCER_SUBCLASS_POLYSOMY7_UP_Down	1.29877	1.04206	1.45261	1	1	1	1	1	1	1	1	1	1	1	1	1	1.33556	1	1.33897	1.73073	1.54654	1.02118	1	1.13044	1.21001	1.25496	1	1.36099	1	1	1	1	1	1	1.26165	1.00672	1	1	1	1	1	1	1.4215	1	1	1	1.14584
CHIANG_LIVER_CANCER_SUBCLASS_POLYSOMY7_UP_Up	1	1	1	1.20176	1.28675	1.1905	1.38675	1.0106	1.2615	1.42671	1.34394	1.17557	1.35574	1.1425	1.26162	1.14394	1	1	1	1	1	1	1	1	1	1	1.04187	1	1.34595	1.09865	1	1	1.27115	1	1	1	1	1	1.06916	1	1.36426	1.32852	1	1	1	1.26103	1
CHIANG_LIVER_CANCER_SUBCLASS_PROLIFERATION_DN_Down	1.29236	1.11513	1.21258	1	1	1.44607	1.0495	1	1.03474	1	1	1	1	1	1	1	1.19202	1	1.54889	1	1.18706	1	1.06743	1.16005	1.40421	1.30398	1	1.5012	1	1	1	1	1	1.10846	1.18899	1	1.25497	1	1	1.43921	1.26048	1.32187	1.20751	1	1	1	1.66434
CHIANG_LIVER_CANCER_SUBCLASS_PROLIFERATION_DN_Up	1	1	1	1	1.49674	1	1	1.05177	1	1.44382	1.03606	1.52359	1	1.64487	1.18429	1.43594	1	1.35343	1	1.17361	1	1.09941	1	1	1	1	1.0979	1	1	1	1.28928	1	1	1	1	1	1	1.44208	1.76585	1	1	1	1	1	1	1.08858	1
CHIANG_LIVER_CANCER_SUBCLASS_PROLIFERATION_UP_Down	1	1	1	2.68485	1	2.05645	1	1	1	2.70782	2.31859	2.50395	1	1.60643	1	1.05697	1	1	1	1	1	1	1	1	1	1.44378	1	1	1	1.30072	1	1.00128	1	1	1.33878	1.36221	1	1.58423	1.35138	1	1.41776	1	1	1	1	1	1.0917
CHIANG_LIVER_CANCER_SUBCLASS_PROLIFERATION_UP_Up	1.46667	1.20746	1.45381	1	1	1	1.0235	1.552	1	1	1	1	1.11474	1	1	1	1.36316	1.3447	1	1.1758	1.14678	1.0709	1.18175	1.28393	2.29983	1	1	1.13532	1.27238	1	1	1	1.6798	1.24434	1	1	1.15187	1	1	1	1	1	1.45156	1.05022	1	1.48663	1
CHIANG_LIVER_CANCER_SUBCLASS_UNANNOTATED_DN_Down	1	1	1	1.23394	1.29218	1	1	1	1	1	1.59758	1	1	1	1	1	1	1	1	1	1	1	1	1	1	1	1	1	1	1	1	1	1	1	1.33418	1.72484	1	1.06012	1	1	1	1	1	1	1	1	1
CHIANG_LIVER_CANCER_SUBCLASS_UNANNOTATED_DN_Up	1	1	1	1	1	1	1	2.17958	1.26238	1.03153	1	1.54914	2.50813	2.03728	2.37804	1	1	1	1	1	1	2.07852	1	1.3318	1.30994	1	1	1.02398	1.26909	1.39452	1	1	1	1.17394	1	1	1	1	1	1.03133	1.12859	1.38408	1	1	1	1	1
CHIANG_LIVER_CANCER_SUBCLASS_UNANNOTATED_UP_Down	1	1.08938	1	1	1	1.38307	1	1.63509	1.62944	1	1	1.08767	2.23939	1.34894	1.96901	1	1	1	1.09333	1	1	1.73081	1	1	1	1	1	1	1	1.41558	1.17343	1	1	1.11585	1	1	1	1	1	1	1.01041	1	1	1	1	1	1.18284
CHIANG_LIVER_CANCER_SUBCLASS_UNANNOTATED_UP_Up	1	1	1	1	1.53606	1	1.49009	1	1	1	1	1	1	1	1	1	1	1.06113	1	1.30379	1	1	1	1.55612	1	1	1.05449	1.30019	1.00105	1	1	1	1	1	1.03485	1	1.2346	1.68784	1.17015	1	1	1	1	1.08236	1.01401	1.04754	1
CHIARADONNA_NEOPLASTIC_TRANSFORMATION_CDC25_DN_Down	1	1	1.39296	1	1	1.07254	1	1	1	1	1.03213	1	1	1	1	1	1	1	1.05685	1	1	1	1.31629	1.01867	1.17698	1.20438	1	1	1	1	1	1	1	1	1.36018	1.31633	1	1	1	1	1	1	1.38671	1	1	1	1.29447
CHIARADONNA_NEOPLASTIC_TRANSFORMATION_CDC25_DN_Up	1	1.44567	1	1.40593	1.03539	1	1.88338	1.76849	1	1.8694	1	1.14914	1.35406	1.86344	1.58397	1.24499	1	1.40409	1	1.80025	1.65795	1.93422	1	1	1	1	1.68123	1	1.14179	1	1.81857	1	1.40401	1	1	1	1	1.43972	1.4285	1	1.15347	1.12784	1	1.9827	1.42948	1	1
CHIARADONNA_NEOPLASTIC_TRANSFORMATION_CDC25_UP_Down	1.27746	1.10124	1.25532	1	1	1.15511	1	1	1.89798	1	1.46736	1.20125	1.328	1.0135	1.23982	1	1	1	1.20509	1	1	1	1	1.1409	1	1.17346	1	1	1	1.04139	1	1	1.38988	1.0039	1.16501	1.01963	1	1	1	1	1.14448	1	1.27485	1	1	1	2.23164
CHIARADONNA_NEOPLASTIC_TRANSFORMATION_CDC25_UP_Up	1	1	1	1	1.10878	1	2.04213	1.139	1	1.15136	1	1	1	1	1	1.42546	1.34031	1.7849	1	1.95461	1.89115	1.06115	1	1	1.24721	1	1.08187	1	1.33594	1	1.25867	1	1	1	1	1	1.13698	1.36376	1.32075	2.06843	1	1.75163	1	1.96823	1.65146	1.27248	1
CHIARADONNA_NEOPLASTIC_TRANSFORMATION_KRAS_CDC25_DN_Down	1.34029	1	1.69907	1	1	1.2926	1	1	1.57999	1	1	1.1652	1.4522	1.19485	1.00881	1	1	1	1.00626	1	1	1	1	1	1	1	1	1	1	1.39168	1	1.114	1.30761	1	1.27532	1.3697	1.41499	1	1	1	1.41165	1	1.70206	1	1	1	2.09257
CHIARADONNA_NEOPLASTIC_TRANSFORMATION_KRAS_CDC25_DN_Up	1	1	1	1.19242	1.65368	1	1.94624	1.31769	1	1.53617	1	1	1	1	1	1.43793	1.25513	1.69983	1	1.96876	1.92912	1.28633	1.14449	1	1.58124	1	1.33757	1.76012	1.56966	1	1.7176	1	1	1	1	1	1	1	1.15296	1.90021	1	1.30829	1	1.85847	1.56432	1.3501	1
CHIARADONNA_NEOPLASTIC_TRANSFORMATION_KRAS_CDC25_UP_Down	1.47043	1	2.01414	1	1	1	1	1	1	1	1	1.28522	1	1	1	1	1	1	1.48452	1	1	1	1	1.25375	1	1.33809	1	1	1	1	1	1	1	1.07414	1.71097	1	1	1	1	1	1	1	2.00907	1	1	1	1.04089
CHIARADONNA_NEOPLASTIC_TRANSFORMATION_KRAS_CDC25_UP_Up	1	1	1	1.79317	1	1.37621	1.35787	1.71363	1.13685	1.52855	1.3555	1	1.33955	1.65476	1.61313	1.21041	1.11479	1.61698	1	1.85374	1.43885	2.05965	1	1	1.44578	1	1.49877	1	1.06252	1	1.366	1	1.31721	1	1	1	1	1.83682	1.30747	1.25346	1.02475	1.23933	1	1.77717	1.29076	1.01525	1
CHIARADONNA_NEOPLASTIC_TRANSFORMATION_KRAS_DN_Down	1	1	1.24006	1.06149	1	1.51435	1	1	1.37508	1	1.13885	1.14493	1	1	1	1	1.33318	1	1.41119	1	1	1	1.3458	1.43133	1	1.33621	1	1	1	1.38343	1	1	1.02207	1.28507	1.55283	1	1	1	1	1	1.31944	1	1.25402	1	1	1.2686	1.70375
CHIARADONNA_NEOPLASTIC_TRANSFORMATION_KRAS_DN_Up	1	1.18106	1	1	1.03211	1	2.02644	1.5602	1	1.56899	1	1	1	1.53999	1.15185	1.90494	1	1.82096	1	1.96588	1.80544	1.79797	1	1	1.06872	1	1.77421	1	1.36677	1	1.75256	1	1	1	1	1	1	1.79448	1.41606	1.19213	1	1.32996	1	2.01805	1.41595	1	1
CHIARADONNA_NEOPLASTIC_TRANSFORMATION_KRAS_UP_Down	1	1	1.02977	1.27681	1	1.26533	1	1	1	1.18493	1.02767	1.68037	1	1	1	1	1	1	1	1	1	1	1	1	1	1	1	1	1	1.01674	1	1	1	1.22596	1.30326	1	1	1	1	1	1.28729	1	1.02349	1	1	1	1.26776
CHIARADONNA_NEOPLASTIC_TRANSFORMATION_KRAS_UP_Up	1	1	1	1	1	1	1.31944	1.13167	1	1	1	1	1	1	1	1	1.06361	1.20194	1	1.66062	1.69413	1.33885	1	1	1.67663	1	1	1.13713	1.05034	1	1	1	1	1	1	1	1.09198	1	1	1.10929	1	1	1	1.1652	1.16666	1	1
CHIARETTI_ACUTE_LYMPHOBLASTIC_LEUKEMIA_ZAP70_Down	1	1	1	1	1	1	1	1	1.15302	1	1	1.05009	1	1	1	1	1	1	1	1	1	1	1	1	1	1	1	1	1	1.35031	1	1	1	1.50983	1	1	1	1	1	1	1	1	1	1	1	1	1
CHIARETTI_ACUTE_LYMPHOBLASTIC_LEUKEMIA_ZAP70_Up	1	1	1	1	1.2181	1	1.19153	1	1	1	1	1	1	1	1	1	1	1.21364	1	1.2611	1.05687	1	1	1.13403	1	1	1	1	1	1	1	1	1.11869	1	1.3332	1	1	1	1	1	1	1	1	1.22725	1	1	1.0799
CHIARETTI_T_ALL_REFRACTORY_TO_THERAPY_Down	1	1	1	1	1	1	1	1	1.33659	1	1.12626	1	1.02805	1	1	1	1	1	1	1	1	1	1	1	1	1	1	1	1	1	1	1	1	1	1	1	1	1	1	1	1.35359	1.04898	1	1	1	1	1
CHIARETTI_T_ALL_REFRACTORY_TO_THERAPY_Up	1	1	1	1	1	1	1	1	1	1	1	1	1	1	1	1	1	1	1	1	1	1	1	1	1	1	1	1	1	1	1	1	1	1	1	1	1	1	1	1	1	1	1	1.40609	1.27674	1.04821	1
CHIBA_RESPONSE_TO_TSA_DN_Down	1	1	1	1	1	1	1	1.80106	2.13611	1.84467	1.57719	1.45684	2.1932	1.72028	2.1654	1	1	1	1.03661	1	1	1.77157	1	1	1	1	1.233	1	1	1	1	1.1301	1	1	1	1	1	1	1	1	1.57184	1.0592	1	1	1	1	1
CHIBA_RESPONSE_TO_TSA_DN_Up	1	1	1	1	1	1	1.71193	1	1	1	1	1	1	1	1	1.11736	1	1.61214	1	1.40213	1	1	1.00705	1.52127	1	1	1	1.03726	1	1	1	1	1	1	1	1	1	1	1	1.45247	1	1	1	1.61288	1.34474	1.12213	1
CHIBA_RESPONSE_TO_TSA_Down	1.47634	1.08657	1.56546	1	1	1.58983	1	1	1	1	1.16222	1	1	1	1	1	1.00369	1	1	1	1	1	1	1.33841	1	1	1	1	1.02891	1	1	1	1	1	1.47975	1.22716	1	1	1	1	1.11883	1.22686	1.51925	1	1	1	1.04165
CHIBA_RESPONSE_TO_TSA_Up	1	1	1	1	1.01357	1	1.33199	1.54079	1	1.38153	1	1.61759	1.48283	1.39774	1.44404	1.16503	1	1	1	1.20536	1.17506	1.43997	1	1	1	1	1	1	1	1	1	1	1	1.37564	1	1	1	1.50041	1.23817	1	1	1	1	1.55765	1.11334	1	1
CHIBA_RESPONSE_TO_TSA_UP_Down	1.34673	1.09762	1.4265	1	1	1.53407	1	1	1.33918	1	1	1	1	1	1	1	1.10193	1	1.14315	1	1	1	1.20692	1.39743	1	1	1	1	1	1	1	1.329	1	1	1.98105	1.02442	1.33332	1	1	1.01986	1	1	1.41792	1	1	1.2158	1.47351
CHIBA_RESPONSE_TO_TSA_UP_Up	1	1	1	1.65266	1.59816	1	1.74658	1.66363	1	1.17375	1	1	1	1.43166	1.2561	1.70173	1	1.93576	1	1.96523	2.0307	1.84216	1	1	1.35196	1	1.30889	1	1.20735	1.47123	1.62026	1	1.52676	1	1	1	1	1.84436	1.55005	1	1	1	1	1.92613	1.62374	1	1
CHICAS_RB1_TARGETS_CONFLUENT_Down	1	1	1.14107	1	1	1.20167	1	1	1.28074	1	1.53542	1.38579	1.53051	1	1.07619	1	1	1	1.14552	1	1	1	1.10993	1.35792	1	1.6252	1	1	1	1.3956	1	1.51985	1.11727	1.04596	2.01584	1.31588	1	1	1	1	1.35191	1	1.15785	1	1	1	1.89186
CHICAS_RB1_TARGETS_CONFLUENT_Up	1.21231	1.56467	1	1.2931	1.14164	1	2.00516	1.70815	1	1.46017	1	1	1	1.4512	1	1.39211	1.37393	1.90025	1	2.03727	2.14411	1.79978	1	1	1.54891	1	1.37583	1	1.20627	1	2.02297	1	1	1	1	1	1	1.31812	1.05571	1.77825	1	1.32527	1	2.02873	1.60459	1.15618	1
CHICAS_RB1_TARGETS_GROWING_Down	1	1	1	1.8586	1	1.67175	1	1	1.1973	2.11227	2.18564	1.98115	1	1.20281	1.14548	1.10114	1	1	1.25693	1	1	1	1	1	1	1.47344	1	1	1	1.19538	1	1.50639	1.01558	1	1.48866	1.05963	1	2.15639	1.12629	1	1.72215	1	1	1	1	1	1.95301
CHICAS_RB1_TARGETS_GROWING_Up	1.59306	1.37269	1.66572	1	1	1	1.76519	1.31036	1	1	1	1	1	1	1	1	1.48921	1.59126	1	1.47573	1.31508	1.31062	1	1	1.62911	1	1	1	1.63436	1	1.39865	1	1	1	1	1	1	1	1	1.58618	1	1	1.64625	1.68147	1.46216	1.25194	1
CHICAS_RB1_TARGETS_LOW_SERUM_Down	1	1	1	1	1	1	1	1	1	1.33224	1.50033	1.15829	1	1	1	1	1	1	1	1	1	1	1.16801	1	1	1.14021	1.26662	1.02093	1	1	1	1	1	1	1	1.85252	1.56782	1	1	1	1	1	1	1	1	1	1
CHICAS_RB1_TARGETS_LOW_SERUM_Up	1	1.20683	1	1	1	1.29278	1.03215	1.02412	1.5475	1	1	1	2.40987	1.64764	2.1729	1	1	1	1	1	1	2.0528	1	1	1	1	1	1	1.29064	1	1	1.29353	1	1.29884	2.62339	1	1	1	1	1.04958	1.30636	1.13086	1	1.2711	1.25515	1.29995	1
CHICAS_RB1_TARGETS_SENESCENT_Down	1.00329	1	1	1.69415	1	1.48199	1	1	1.36161	1.1429	1.63586	1.2997	1	1	1	1	1	1	1	1	1	1	1	1	1	1	1	1	1	1.04572	1	1.02854	1.09664	1	1.25241	1.07917	1	1.479	1	1	1.49614	1.11106	1	1	1	1	1.20832
CHICAS_RB1_TARGETS_SENESCENT_Up	1	1	1	1	1	1	1.37302	1	1	1	1	1	1	1	1	1	1	1.11471	1	1.44212	1.49812	1.07246	1	1.16176	1.48121	1	1	1	1.12006	1	1.24206	1	1	1.37221	1	1	1	1	1.19037	1	1	1	1	1.30175	1.21877	1.17464	1
CHIN_BREAST_CANCER_COPY_NUMBER_UP_Down	1	1	1	1	1	1	1	1	1	1	1.08774	1	1	1.02754	1	1	1	1	1	1	1	1.43878	1	1	1	1.25269	1	1	1	1	1	1	1	1	1	1	1	1	1	1	1.52805	1	1	1	1	1	1
CHIN_BREAST_CANCER_COPY_NUMBER_UP_Up	1	1	1	1.10215	1.15703	1	1	1	1.02435	1	1	1	1	1	1	1	1	1	1	1	1	1	1.26543	1	1	1	1.07927	1.71854	1	1	1	1	1	1	1	1	1	1	1	1	1	1	1	1.31959	1.17636	1.20957	1
CHNG_MULTIPLE_MYELOMA_HYPERPLOID_DN_Down	1	1	1	1	1	1	1	1	1	1	1	1	1	1	1	1	1	1	1	1	1	1	1	1	1	1	1	1	1	1	1.13331	1	1	1	1	1.30525	1	1	1	1	1	1	1	1	1	1	1.09404
CHNG_MULTIPLE_MYELOMA_HYPERPLOID_DN_Up	1	1	1	1.73317	1	1	1	1.76577	1.61865	1.70606	1	1.32673	1	1	1	1	1	1	1	1	1	1	1.17317	1	1.09076	1	1	1	1	1.62286	1	1	1	1	1	1	1	1	1	1.14099	1	1	1	1	1	1	1
CHNG_MULTIPLE_MYELOMA_HYPERPLOID_UP_Down	1.75056	1.41595	1.75824	1	1	1	1.28269	1	1	1	1.74891	1	1	1	1	1	1	1	1	1.00232	1	1	1.02913	1.46615	1	1	1.48781	1.52218	1	1	1	1	1.26852	1	1	1	1.3877	1	1	1.40992	1	1	1.77582	1	1	1.52231	1
CHNG_MULTIPLE_MYELOMA_HYPERPLOID_UP_Up	1	1	1	2.00785	1	2.37461	1	1	1.70904	1	1	1	2.76969	2.03995	2.75822	1	1	1	1	1	1	2.49551	1	1	1	1	1	1	1	1	1	1.25689	1	1	2.20886	1	1	1.18205	1.23965	1	1.37175	1	1	1.11009	1	1	1
CHO_NR4A1_TARGETS_Down	1	1	1	1	1	1	1	1	1	1	1	1	1.43228	1	1.10162	1	1.00516	1	1	1	1	1.02964	1	1	1	1	1	1.12786	1.35753	1	1	1	1	1	1	1	1.34607	1	1	1	1	1	1	1	1	1	1
CHO_NR4A1_TARGETS_Up	1	1	1	1	1.41223	1	1	1	1	1.01179	1	1	1	1	1	1.23311	1	1.07717	1	1	1	1	1	1	1	1	1	1	1	1	1	1	1	1	1	1	1	1	1	1	1	1	1	1.44486	1.53158	1.22986	1.50741
CHOI_ATL_STAGE_PREDICTOR_Down	1	1	1	1.40337	1.46361	1	1	1	1	1	1.14444	1	1	1	1	1	1	1.21895	1	1	1	1	1	1	1	1	1	1	1	1	1	1	1	1	1	1	1	1	1.33014	1	1	1	1	1	1.00753	1	1
CHOI_ATL_STAGE_PREDICTOR_Up	1	1	1	1	1	1	1	1	1	1	1	1	1	1	1	1	1	1	1	1	1	1	1	1.19425	1.05703	1	1	1.03134	1	1	1	1	1	1	1	1	1	1	1	1.03053	1	1	1	1	1	1	1
CHOW_RASSF1_TARGETS_DN_Down	1.08231	1	1.38607	1	1	1	1	1	1	1	1	1	1	1	1	1	1	1	1.08775	1	1	1	1	1	1	1	1	1.1402	1	1	1	1.23153	1.14185	1	1.00521	1.1683	1	1.43525	1	1	1	1	1.36017	1	1	1.06965	1
CHOW_RASSF1_TARGETS_DN_Up	1	1	1	1.08978	1	1	1	1	1.09649	1	1	1	1.52391	1.42061	1.43458	1	1	1	1	1.09293	1	1.43215	1	1	1	1	1	1	1	1	1	1	1	1	1	1	1	1	1	1	1	1	1	1.07214	1	1	1
CHOW_RASSF1_TARGETS_UP_Down	1.00141	1.10427	1	1	1.14947	1	1	1.0425	1.31886	1.07171	1.26364	1	1	1	1	1	1	1	1	1	1	1	1	1	1	1	1	1	1	1	1	1	1	1	1	1	1.37028	1	1	1	1	1	1	1	1	1	1
CHOW_RASSF1_TARGETS_UP_Up	1	1	1.3497	1	1	1	1.19098	1	1	1	1	1	1.2561	1	1.0344	1.01646	1.13808	1.6042	1	1	1	1.20543	1.18862	1	1.1565	1.14967	1	1.45828	1.75946	1	1	1	1	1	1	1	1	1	1	1.52296	1	1.37647	1.35448	1.18404	1	1	1
CHUANG_OXIDATIVE_STRESS_RESPONSE_UP_Down	1.54481	1.46165	1.63826	1	1	1	1	1	1	1	1	1.38493	1	1	1	1	1	1	1.19025	1	1	1	1	1	1	1	1	1	1	1	1	1	1	1	1	1	1	1	1	1	1	1	1.67807	1	1	1.01328	1
CHUANG_OXIDATIVE_STRESS_RESPONSE_UP_Up	1	1	1	1	1.49769	1	1	1	1	1.23764	1	1	1.4161	1.10636	1.21242	1.39397	1	1.15675	1	1.26572	1	1.6763	1.41201	1	1	1	1.31648	1.22995	1.25715	1	1	1.18949	1	1	1	1	1	1	1	1	1	1	1	1.76799	1.38147	1	1.20269
CHUNG_BLISTER_CYTOTOXICITY_DN_Down	1	1.03797	1	1.89772	1.08076	1.05535	1	1.30445	1.13258	1	1	1	1.81703	1.66283	1.87327	1.08634	1	1.18254	1	1	1	1.84319	1.11539	1.10967	1	1	1.29632	1	1	1.01678	1	1	1	1	1	1	1.00275	1	1.52739	1.45885	1	1.37454	1	1	1	1	1
CHUNG_BLISTER_CYTOTOXICITY_DN_Up	1	1	1.08117	1	1	1	1	1	1	1	1	1	1	1	1	1	1	1	1	1	1	1	1	1	1	1.02227	1	1	1	1	1.1274	1	1	1	1	1.29499	1	1.50709	1	1	1	1	1.08864	1	1.25601	1.43779	1.40433
CHUNG_BLISTER_CYTOTOXICITY_UP_Down	1.02325	1	1.02576	1.26807	1	1.13931	1	1	1	1	1	1	1	1	1	1	1	1	1.11867	1	1	1	1	1.15593	1	1.08323	1	1.09655	1	1	1	1	1	1	1	1.05332	1	1.26704	1	1.04532	1	1	1.01834	1	1	1	1
CHUNG_BLISTER_CYTOTOXICITY_UP_Up	1	1	1	1	1	1	1	1.2154	1.18879	1.12679	1	1.12079	1.84456	1.40732	1.79398	1.18293	1	1.21567	1	1	1	1.63634	1	1	1	1	1	1	1.16408	1	1.01256	1	1	1	1	1	1	1	1	1	1	1	1	1.03972	1	1	1
CHYLA_CBFA2T3_TARGETS_DN_Down	1	1	1.18741	1	1	1.557	1	1	1	1	1	1	1	1	1	1	1.44981	1	1.42057	1	1.23331	1	1.29477	1	1	1	1.13989	1.10188	1.60551	1.01235	1	1.24779	1	1	1.24071	1.38727	1	1	1	1	1	1	1.1801	1	1	1	1.24234
CHYLA_CBFA2T3_TARGETS_DN_Up	1	1.06558	1	1	1.1612	1	1.35981	1	1	1.53257	1.24117	1.13734	1	1.19614	1.00051	1.47136	1	1	1	1.11999	1	1	1	1	1	1.00032	1	1	1	1	1.24277	1	1.08482	1.00171	1	1	1	1.80941	1.20657	1.1683	1	1.0214	1	1.32675	1.30131	1.2503	1
CHYLA_CBFA2T3_TARGETS_UP_Down	1.52684	1.2967	1.79081	1	1	1.19377	1	1	1.14338	1	1	1	1.12972	1	1	1	1	1	1.41847	1	1	1	1.08672	1.2548	1	1.44542	1	1	1.06111	1	1	1	1	1	1	1	1	1	1	1.40335	1.45453	1.74321	1.77071	1	1	1	1
CHYLA_CBFA2T3_TARGETS_UP_Up	1	1	1	1.40234	1.39739	1	1.54802	1	1	1.32179	1.08361	1	1	1.34477	1	1.17459	1.24938	1.65343	1	1.44651	1.02914	1	1	1	1	1	1.29376	1	1	1	1	1.20063	1.36604	1	1	1.25063	1.01135	1.09075	1.60205	1	1	1	1	1.55592	1.50001	1.29706	1
CLASPER_LYMPHATIC_VESSELS_DURING_METASTASIS_DN_Down	1	1	1.25749	1	1	1	1	1	2.00947	1.18343	1.78003	2.11254	2.16486	1	1.165	1	1	1	1.09594	1	1	1	1.32157	1.48807	1	1.2767	1	1	1	1	1	1	1	1	1.4453	1	1	1	1	1	1.08249	1	1.28593	1	1	1.27862	1.5567
CLASPER_LYMPHATIC_VESSELS_DURING_METASTASIS_DN_Up	1	1	1	1	1.09355	1	2.12485	1.73841	1	1	1	1	1	1.14625	1	1.86019	1.40071	2.26708	1	2.02786	2.046	2.09193	1	1	1.77787	1	1.45124	1.03036	1.65059	1	1	1.81155	1	1	1	1	1	1	1	1.81265	1	1.38404	1	2.09496	1.89288	1	1
CLIMENT_BREAST_CANCER_COPY_NUMBER_UP_Down	1	1	1	1	1	1	1	1.18499	1	1.11438	1.1835	1.27938	1.24164	1.21301	1.42787	1	1.19323	1	1	1	1	1.3199	1	1	1	1	1	1	1	1	1	1.01799	1	1	1.18712	1	1	1	1	1	1.42456	1	1	1	1	1	1
CLIMENT_BREAST_CANCER_COPY_NUMBER_UP_Up	1	1	1	1	1	1	1.06105	1	1	1	1	1	1	1	1	1.07854	1	1	1	1	1	1	1	1	1	1	1.1969	1	1	1	1	1	1	1	1	1	1.06486	1	1	1	1	1.13576	1	1	1.08818	1.42915	1
COATES_MACROPHAGE_M1_VS_M2_DN_Down	1.5066	1.31142	1.73927	1	1	1	1	1	1.53314	1.05024	1.36115	1.21776	1	1	1	1.07397	1	1.06794	1.2348	1	1	1	1	1.02517	1.24553	1	1	1.02897	1.05387	1	1.08087	1.22738	1	1	1.10157	1.27004	1	1	1	1.30154	1.16774	1.38799	1.71684	1	1	1	1
COATES_MACROPHAGE_M1_VS_M2_DN_Up	1	1	1	1.65204	1.27792	1	1.45854	1.18595	1	1	1	1	1	1.21908	1	1	1	1	1	1.28373	1	1	1	1	1	1.28158	1	1	1	1	1	1	1.00547	1	1	1	1.285	1.92978	1.37861	1	1	1	1	1.5392	1.35722	1.03925	1
COATES_MACROPHAGE_M1_VS_M2_UP_Down	1	1	1	1	1	1	1	1	1.22212	1	1	1.46968	1.11298	1	1	1.02848	1	1	1	1	1	1	1.18385	1	1	1.15415	1	1	1	1	1	1	1	1	1.25901	1	1	1	1.04399	1	1.02733	1	1	1	1	1	1.29877
COATES_MACROPHAGE_M1_VS_M2_UP_Up	1	1.01298	1.07908	1	1.07971	1	1.51332	1	1	1.14468	1.10554	1	1	1.07203	1	1	1.71214	1.64817	1	1.37156	1.12772	1.23537	1	1	1	1	1.34981	1	1.1042	1	1.59887	1.10446	1	1	1	1.27935	1	1	1	1	1	1	1.11714	1.17888	1.26673	1.42963	1
COLDREN_GEFITINIB_RESISTANCE_DN_Down	1	1.02853	1	1	1	1.0077	1	1.58179	1.13565	1	1	1	1.52871	1.07829	1.39264	1	1.40772	1	1.92908	1	1.47788	1.35946	1.09269	1.44856	1	1	1	1	1	1.203	1	1	1	1.25381	1.042	1.11211	1	1	1	1.04108	1.00639	1	1	1	1	1	1.11294
COLDREN_GEFITINIB_RESISTANCE_DN_Up	1	1	1.05905	1.85896	1.70447	1	1.81493	1	1	1.25859	1	1.50258	1	1	1	1.35307	1	1.23825	1	1.61733	1	1	1	1	1.21494	1.2095	1.06183	1	1	1	1	1.16696	1.94201	1	1	1	1.29261	1.81289	1.1766	1	1	1	1.07086	1.62335	1.53997	1.62312	1
COLDREN_GEFITINIB_RESISTANCE_UP_Down	1.0808	1	1	1	1	1	1.03713	1.31575	1	1.45571	1.22931	1.23594	1	1	1	1	1	1	1	1	1	1	1	1	1	1	1.00588	1	1	1.11524	1	1	1	1	1	1	1	1.49176	1	1	1	1	1	1	1	1	1
COLDREN_GEFITINIB_RESISTANCE_UP_Up	1	1	1	1	1	1	1	1	1	1	1	1	1	1	1	1	1.05549	1	1.02961	1.2684	1.4305	1.08793	1	1	1	1	1	1	1	1	1.4211	1	1	1.11427	1	1	1	1	1	1	1	1	1	1	1	1	1
COLIN_PILOCYTIC_ASTROCYTOMA_VS_GLIOBLASTOMA_DN_Down	1.81908	1.41172	1.49852	1	1	1.62747	1	1	1.26609	1	1	1	1	1	1	1	1	1	1.69694	1	1	1	1	1	1	1	1	1	1	1.12395	1	1	1	1.50926	1.85183	1	1.45138	1	1	1	1.39063	1	1.5397	1	1	1	1.42434
COLIN_PILOCYTIC_ASTROCYTOMA_VS_GLIOBLASTOMA_DN_Up	1	1	1	1	1	1	1.91171	1.04429	1	1.46214	1.44737	1.34878	1	1.31487	1	1.79174	1	1.87972	1	2.07918	1.72417	1.97105	1	1	1.51513	1	1.4706	1	1.06355	1	2.0771	1.11521	1.53568	1	1	1.35272	1	1	1	1.31309	1	1	1	1.75316	1.51383	1	1
COLIN_PILOCYTIC_ASTROCYTOMA_VS_GLIOBLASTOMA_UP_Down	1.44734	1.10879	1.76434	1	1	1	1	1	1	1	1	1	1.43285	1	1	1	1.07944	1	1.01742	1	1	1	1	1.12969	1	1	1	1.03598	1.12704	1.0768	1	1	1	1.26798	1.05904	1	1	1	1	1	1	1	1.76714	1	1.00421	1	1.56221
COLIN_PILOCYTIC_ASTROCYTOMA_VS_GLIOBLASTOMA_UP_Up	1	1	1	1	1	1	1.25552	1.30548	1.1441	1.93267	1.42978	1.95094	1	1.36862	1	1.29314	1	1	1	1.25478	1	1	1	1	1	1	1.49056	1	1	1	1.11161	1	1	1	1	1.12483	1	1	1	1.23064	1	1	1	1	1	1	1
COLINA_TARGETS_OF_4EBP1_AND_4EBP2_Down	1.09528	1	1.04292	1.90894	1	1.90895	1	1	1.46206	1	1.57201	1	1	1	1	1	1	1	1.45554	1	1	1	1	1.11016	1	1.09498	1	1	1	1	1	1.18981	1.14325	1	1.74748	1.43247	1	1	1	1	1.69158	1.08803	1.04681	1	1	1	1.10772
COLINA_TARGETS_OF_4EBP1_AND_4EBP2_Up	1	1	1	1	1	1	1.68726	1.74977	1	1.1867	1	1.07742	1.22201	1.67259	1.51521	1.46274	1.17899	1.89244	1	1.73314	1.60958	2.03958	1	1	1.53034	1	1.06845	1	1.59478	1	1.48438	1	1	1.17441	1	1	1.27142	1.08646	1.59973	1.34309	1	1	1	1.6441	1.24393	1.21052	1
COLLER_MYC_TARGETS_UP_Down	1	1	1	1.25374	1.48019	1	1	1	1	1	1	1	1	1	1	1	1	1	1	1	1	1	1	1	1	1	1	1	1	1	1	1	1	1	1.05119	1	1	1.98368	1.36317	1	1	1	1	1	1	1	1
COLLER_MYC_TARGETS_UP_Up	1	1	1	1	1	1	1	1.09927	1	1	1.04041	1	1.60957	1	1.36465	1	1	1.45526	1.33138	1	1.23124	1.47443	1.01304	1	1.06274	1	1.22403	1.25448	1	1	1	1	1.04541	1.25951	1	1	1	1	1	1	1.35987	1.38159	1	1	1	1.08025	1
CONCANNON_APOPTOSIS_BY_EPOXOMICIN_DN_Down	1	1	1	1.53023	1	1	1	1	1	1.95232	2.02795	1.85286	1	1	1	1.06105	1	1	1	1	1	1	1	1	1	1.00934	1	1	1	1	1	1.05931	1	1	1.2339	1.30671	1	1	1.09413	1	1.09411	1	1	1	1	1	1.74689
CONCANNON_APOPTOSIS_BY_EPOXOMICIN_DN_Up	1	1	1	1	1	1	1.28762	1.66325	1	1	1	1	2.05371	1.31187	1.73579	1	1	1.04351	1	1.27799	1.31045	1.91062	1	1	1.58174	1	1.13075	1	1.2874	1	1	1	1.35069	1	1	1	1.31072	1	1	1.4115	1	1.29482	1	1.08812	1.20976	1	1
CONCANNON_APOPTOSIS_BY_EPOXOMICIN_UP_Down	1.68943	1.09559	1.87112	1	1	1.06485	1	1.03543	1	1	1	1	1.15895	1	1	1	1.08533	1	1	1	1	1	1.12973	1	1	1	1	1	1.1061	1.1939	1	1.47423	1	1.07724	1.59127	1.04742	1	1	1	1	1.0013	1	1.88906	1	1	1	1
CONCANNON_APOPTOSIS_BY_EPOXOMICIN_UP_Up	1	1	1	1	1	1	1.56616	1	1	1.38695	1	1.97172	1	1.28657	1	1.24752	1	1.0596	1	1.22963	1.34217	1	1	1	1.09826	1.31141	1.23358	1	1	1	1.01249	1	1	1	1	1	1	1.84525	1.29253	1.27472	1	1.06132	1	1.26241	1	1	1.60235
CONRAD_STEM_CELL_Down	1	1.04525	1	1.32384	1	1.61346	1	1	1	1.00436	1	1.05647	1.30613	1.01499	1.32401	1	1.12205	1	1.01531	1	1	1.28722	1	1	1	1.05315	1.51612	1	1	1.06694	1	1	1.15149	1	1	1	1	1	1	1	1	1.03804	1	1	1	1	1.56732
CONRAD_STEM_CELL_Up	1	1	1.01516	1	1.00708	1	1.01052	1	1	1	1	1	1	1	1	1.05632	1	1	1	1.03337	1	1	1	1	1.12523	1	1	1	1	1	1	1.4572	1	1	1	1.32113	1.32875	1	1	1	1	1	1.02092	1.26666	1.11406	1	1
CORRE_MULTIPLE_MYELOMA_DN_Down	1	1	1	1	1	1.43553	1	1	1.26374	1	1.12715	1	2.05378	1	1.02745	1	1.05923	1	1.11881	1	1	1	1	1.4363	1	1.37933	1	1	1	1	1	1	1	1	1.3276	1.42325	1	1	1.38323	1	1.35832	1	1	1	1	1	1.77044
CORRE_MULTIPLE_MYELOMA_DN_Up	1.06074	1.16856	1	1	1	1	2.04668	1.47553	1	1.88054	1	1.02229	1	1.2412	1	1.27202	1	1.49438	1	1.74329	1.67602	1.4324	1.03405	1	1.36213	1	1.11562	1	1	1.28835	1.65531	1.3172	1.32388	1.367	1	1	1.1908	1.21639	1	1.85098	1	1.18818	1	2.03342	1.83338	1.59672	1
CORRE_MULTIPLE_MYELOMA_UP_Down	1.52975	1	1.80488	1	1	1.01767	1	1	1.39893	1	1.18202	1	1.59707	1	1.24228	1	1	1	1	1	1	1	1.55266	1	1.05596	1.21567	1	1.48221	1	1.15474	1	1.02991	1	1	1.04353	1.17803	1	1	1	1	1.72587	1.79406	1.82811	1	1	1	1
CORRE_MULTIPLE_MYELOMA_UP_Up	1	1	1	1.46248	1.35775	1	1.30571	1.22409	1	1	1	1.64161	1	1	1	1	1.32139	1.13982	1	1.7751	1.57636	1.02554	1	1	1	1	1.05407	1	1.05867	1	1.44002	1	1	1	1	1	1.31716	1	2.0119	1	1	1	1	1.31615	1.44304	1.36163	1.05186
COULOUARN_TEMPORAL_TGFB1_SIGNATURE_DN_Down	1.09066	1	1.49607	1	1	1.32255	1	1	1.35028	1	1	1	1.07563	1	1	1	1	1	1	1	1	1	1	1	1	1.44462	1	1	1.22094	1	1	1	1	1.37555	1.43866	1.08113	1	1	1	1.04555	1.04414	1.03033	1.49829	1	1	1	1.33185
COULOUARN_TEMPORAL_TGFB1_SIGNATURE_DN_Up	1	1	1	1	1	1	1.48608	1	1	1.06907	1	1.18446	1	1	1	1.39997	1	1.24924	1	1.57005	1.59412	1.10488	1	1	1	1	1.17673	1	1	1.23693	1.83236	1	1.39263	1	1	1	1	1.61534	1.72478	1	1	1	1	1.54233	1.07882	1	1
COULOUARN_TEMPORAL_TGFB1_SIGNATURE_UP_Down	1.17272	1.11314	1.29745	1	1	1.3077	1	1	1.32812	1	1.19655	1	1.59738	1.46281	1.63047	1	1	1	1	1	1	1.39338	1	1	1	1.05685	1	1	1	1.3229	1	1	1	1	1	1	1	1	1	1	1.44844	1.18736	1.274	1	1	1	1
COULOUARN_TEMPORAL_TGFB1_SIGNATURE_UP_Up	1	1	1	1	1	1	1.37044	1.02896	1	1	1	1	1	1	1	1.02384	1	1	1	1.15395	1.15348	1	1	1	1.3939	1	1	1	1	1	1.19417	1.08258	1	1.02221	1.13433	1.26273	1.12378	1.05663	1	1	1	1	1	1.47259	1	1	1
COWLING_MYCN_TARGETS_Down	1.12873	1	1.64583	1	1	1	1	1	1	1	1.09448	1	1.0199	1	1	1	1.02224	1	1	1	1	1	1.2554	1.14876	1	1.47361	1	1.20256	1	1.12172	1	1.42043	1.00159	1	2.11412	1.1415	1	1	1	1	1.01104	1	1.63012	1	1	1	1
COWLING_MYCN_TARGETS_Up	1	1	1	1	1.31186	1.20502	1.4278	1	1	1.80274	1	1.18053	1	1.71382	1.29568	1.59096	1	1.64302	1	1.62055	1.52145	1.81935	1	1	1	1	1.2314	1	1.14023	1	1.71057	1	1	1	1	1	1.24627	1	1	1.30811	1	1.34999	1	1.64345	1.27474	1.10491	1
CREIGHTON_AKT1_SIGNALING_VIA_MTOR_DN_Down	1	1	1	1	1	1	1	1	1	1	1	1	1	1	1	1	1	1	1.33908	1	1.26	1	1	1	1	1	1	1	1	1	1	1.22997	1	1	1.4128	1.45801	1	1	1	1	1	1	1	1	1	1.0588	1
CREIGHTON_AKT1_SIGNALING_VIA_MTOR_DN_Up	1	1	1	1	1	1	1	1	1	1	1	1	1	1	1	1	1	1	1	1.05395	1	1.56887	1	1	1	1	1	1	1	1.4885	1	1	1.29583	1	1	1	1	1	1	1	1	1	1	1	1	1	1
CREIGHTON_AKT1_SIGNALING_VIA_MTOR_UP_Down	1	1	1	1	1	1	1	1	1	1	1	1	1	1	1	1	1	1	1.3184	1	1.08836	1	1	1	1	1	1	1	1	1	1.06102	1	1	1	1	1	1	1.03019	1	1	1	1	1	1	1.17535	1.32981	1
CREIGHTON_AKT1_SIGNALING_VIA_MTOR_UP_Up	1	1	1	1	1	1	1	1.60765	1.36182	1.06833	1	1.29861	1.86609	1.53346	1.62	1	1	1	1	1.00925	1	1.0948	1	1	1.19561	1	1.10155	1	1	1.46369	1	1	1.18864	1	1	1	1.14523	1	1	1	1.68686	1.51016	1	1	1	1	1.53043
CREIGHTON_ENDOCRINE_THERAPY_RESISTANCE_1_Down	1	1	1	1.4818	1	1.22756	1	1.07091	1	1.23888	1.57651	1.32415	1	1.09193	1	1	1	1	1.01709	1	1	1	1.06224	1	1	1.19147	1.02988	1.00003	1	1.34532	1	1	1	1	1	1	1	1.79855	1.30643	1	1.02474	1	1	1	1	1	1.38521
CREIGHTON_ENDOCRINE_THERAPY_RESISTANCE_1_Up	1	1	1	1	1	1	1.29165	1	1	1	1	1	1.11332	1	1	1	1	1	1	1.28884	1.04248	1.00146	1	1	1.18535	1	1	1	1	1	1	1	1	1.13412	1	1	1.1162	1	1	1.16569	1	1	1	1.28616	1.07081	1	1
CREIGHTON_ENDOCRINE_THERAPY_RESISTANCE_2_Down	1	1.07609	1	1	1	1	1	1.44092	1	1	1	1	1	1	1	1.30832	1	1	1.93767	1	2.14736	1.11692	1.00279	1.49205	1	1	1	1	1	1.31479	1.07401	1	1	1.11017	1	1	1	1	1	1	1	1	1	1.52236	1	1	1
CREIGHTON_ENDOCRINE_THERAPY_RESISTANCE_2_Up	1	1	1.28078	1.38915	1.02095	1.04516	1	1	1.1228	1.23909	1.72633	1	1	1.37867	1.08186	1	1.31151	1	1	1	1	1	1	1	1.1213	1.35757	1	1	1.62937	1	1	1	1	1	1.34497	1	1	1.62626	1.45257	1.27442	1	1.11317	1.27783	1	1	1.08814	1
CREIGHTON_ENDOCRINE_THERAPY_RESISTANCE_3_Down	1.11228	1.19355	1	1	1	1.06184	1	1.07193	1.08765	1	1	1	1.54306	1	1.35726	1	1	1	1.38132	1	1.34628	1.263	1	1.11256	1.28781	1	1	1	1	1	1	1	1	1	1	1	1	1	1	1	1.42984	1.06884	1	1	1	1	1.08433
CREIGHTON_ENDOCRINE_THERAPY_RESISTANCE_3_Up	1	1	1	1.02769	1	1	1.26162	1	1	1.16891	1.07848	1	1	1	1	1	1.00264	1.02441	1	1.0404	1	1	1	1	1	1	1	1	1	1	1	1.25223	1.16613	1	1.1963	1.15947	1.44409	1.63065	1.23772	1	1	1	1	1.35166	1.27211	1.31246	1
CREIGHTON_ENDOCRINE_THERAPY_RESISTANCE_4_Down	1.19978	1	1.32785	1.24061	1	1.03313	1	1.19555	1	1.07154	1.00939	1.4879	1.27988	1.16179	1.12126	1	1	1	1	1	1	1	1	1	1	1	1	1	1	1.42269	1	1.24219	1.23677	1	1.21524	1	1	1	1.0246	1	1	1	1.3421	1	1	1	1.29769
CREIGHTON_ENDOCRINE_THERAPY_RESISTANCE_4_Up	1	1	1	1	1	1	1.06562	1	1	1	1	1	1	1	1	1.0087	1	1.09978	1	1.35486	1.19687	1.26037	1	1	1	1	1.0747	1	1.2085	1	1.20337	1	1	1.14321	1	1	1	1	1	1.2773	1	1	1	1.22694	1.11673	1.19062	1
CREIGHTON_ENDOCRINE_THERAPY_RESISTANCE_5_Down	1	1	1	1.01912	1	1.26251	1	1.23568	1.10626	1	1	1	1.94189	1.39293	1.85342	1	1	1	1.33035	1	1.08149	1.65711	1	1	1	1	1	1	1	1.30824	1	1	1	1	1	1	1	1	1	1	1.59129	1.21314	1	1	1	1	1.62487
CREIGHTON_ENDOCRINE_THERAPY_RESISTANCE_5_Up	1.05049	1	1	1	1	1	1.41909	1	1	1.01434	1	1	1	1	1	1	1	1.0342	1	1.23024	1	1	1	1	1	1	1.0377	1	1	1	1	1	1	1	1.06852	1	1.1422	1.88445	1.34785	1.15986	1	1	1	1.54163	1.30139	1.23017	1
CROMER_METASTASIS_DN_Down	1	1	1.51477	1.05805	1	1.24878	1	1	1	1	1	1	1	1	1	1	1.06544	1	1	1	1	1	1	1	1	1	1	1	1.18135	1	1	1	1	1.04855	1	1	1.05833	1	1.29733	1	1	1	1.50403	1	1	1	1.59491
CROMER_METASTASIS_DN_Up	1	1	1	1	1	1	1.72021	1	1.25062	1.57402	1.28193	1.22729	1.27762	1	1.1029	1.30021	1	1.26483	1	1.21013	1.20544	1.13822	1	1	1.36474	1.26752	1.20535	1	1	1	1	1	1	1	1	1	1	1	1	1	1	1.17434	1	1.27646	1.1882	1.2763	1
CROMER_METASTASIS_UP_Down	1.17648	1.19644	1	1.05329	1.35078	1	1	1	1.86745	1.68311	1.5133	1.65241	1.3041	1	1.00217	1	1	1	1.32986	1	1	1	1	1	1	1	1.28974	1	1	1.05474	1	1	1	1	1	1	1	1	1	1	1.5568	1.04202	1	1	1	1	1.04964
CROMER_METASTASIS_UP_Up	1	1	1	1	1	1.04015	1.35821	1	1	1	1	1	1	1	1	1	1	1	1	1.04872	1	1	1	1	1	1	1	1	1	1	1	1	1	1	1	1	1	1	1	1	1	1	1	1.03231	1	1	1
CROMER_TUMORIGENESIS_DN_Down	1	1	1	1	1	1	1	1	1	1	1	1	1	1	1	1	1	1.17232	1.05601	1	1	1	1	1	1	1	1	1.09446	1	1	1	1	1	1	1	1	1	1	1	1	1	1	1	1	1	1	1
CROMER_TUMORIGENESIS_DN_Up	1	1	1	1	1.75628	1	1	1	1	1	1	1.17057	1	1.08855	1	1	1	1	1	1.50498	1.21915	1.32359	1	1	1	1	1.1464	1	1.19398	1	1	1	1	1	1	1	1	1	1	1	1	1	1	1	1	1.58081	1
CROMER_TUMORIGENESIS_UP_Down	1	1	1.09607	1	1	1.43352	1	1	1.65244	1.42682	1.66462	2.01417	1.24837	1	1	1	1	1	1.0079	1	1	1	1	1.36555	1	1.14517	1	1	1	1.10538	1	1.61755	1.03508	1.172	1.88894	1	1.67904	1	1	1	1.19168	1	1.09869	1	1	1.28173	1
CROMER_TUMORIGENESIS_UP_Up	1	1.46298	1	1.05961	1.44897	1	1.92544	1.50589	1	1	1	1	1	1.24497	1	1.41359	1.4154	1.83142	1	1.93192	2.1198	1.97066	1	1	1.37167	1	1	1	2.07904	1	2.17523	1	1	1	1	1.00351	1	1	1	1.45443	1	1.23145	1	1.9068	1.6838	1	1.20124
CROONQUIST_IL6_DEPRIVATION_DN_Down	1	1	1	2.3025	2.32674	2.17364	1	1	1	2.4252	2.16877	2.33026	1	1.34403	1	1.07131	1	1	1	1	1	1	1	1	1	1.25797	1.10216	1	1	1	1	1.05648	1	1.11224	1.41315	1.44477	1	2.18747	1.98714	1	1	1	1	1	1	1	1
CROONQUIST_IL6_DEPRIVATION_DN_Up	1.64077	1.2443	1.53896	1	1	1	1	1.95274	1.3401	1	1	1	1.89648	1	1.24828	1	1.4752	1.42237	1	1.16101	1	1.41526	1	1	2.69778	1	1	1.48271	1.73669	1	1.05294	1	1.93972	1	1	1	1	1	1	1	1	1	1.53033	1	1	1.55887	1
CROONQUIST_NRAS_SIGNALING_DN_Down	1	1	1	2.54182	2.6104	2.03199	1	1	1	2.63189	2.37738	2.42388	1	1.34514	1	1.24094	1	1	1	1.23359	1	1	1	1	1	1.07071	1.06249	1	1	1	1	1	1	1	1.30377	1.66473	1	2.39232	1.72029	1	1	1	1	1	1	1	1
CROONQUIST_NRAS_SIGNALING_DN_Up	1.47491	1.00227	1.67273	1	1	1	1	1.91589	1.06298	1	1	1	1.99706	1	1.43112	1	1.49939	1.42597	1.06742	1	1	1.39919	1	1	2.51243	1	1	1.45158	1.70138	1.44474	1	1.02202	1.71528	1	1	1	1.37755	1	1	1	1	1	1.68459	1	1	1.56653	1
CROONQUIST_NRAS_SIGNALING_UP_Down	1	1	1	1	1	1	1	1	1	1	1	1	1.15592	1	1	1.14281	1	1	1.16063	1	1	1	1	1	1	1	1	1	1.5733	1	1	1	1	1	1.10782	1	1	1	2.13117	1	1.50028	1	1	1	1	1	1
CROONQUIST_NRAS_SIGNALING_UP_Up	1	1	1	1	1.6113	1	1	1	1	1	1	1	1	1	1	1	1.24429	1	1	1	1	1	1	1	1	1	1	1	1	1	1	1	1.69144	1	1	1	1	1.45127	1	1	1	1	1	1	1	1	1
CROONQUIST_NRAS_VS_STROMAL_STIMULATION_DN_Down	1	1	1	1.65701	1	1.93842	1	1	1.75267	1.70122	1.99219	1.78724	1	1.21136	1	1	1	1	1	1	1	1	1.07613	1	1	1.49186	1	1	1	1.63283	1	1.61342	1	1	1.82254	1.89553	1.16147	1.69802	1	1	1.06633	1	1	1	1	1.51721	1.69464
CROONQUIST_NRAS_VS_STROMAL_STIMULATION_DN_Up	1.06324	1.3573	1	1	1	1	1.95961	1.69441	1	1	1	1	1.10692	1	1	1.3336	1.16975	1.61088	1	1.75735	1.83957	1.55424	1	1	2.27899	1	1.21435	1	1.22549	1	1	1	1.36447	1	1	1	1	1	1.07776	1.4385	1	1	1	2.02676	1.61024	1	1
CROONQUIST_NRAS_VS_STROMAL_STIMULATION_UP_Down	1.4432	1.34298	1.49378	1.04644	1	1	1	1	1	1	1	1	1.37103	1	1	1	1	1	1.27942	1	1.07064	1.14212	1	1.1381	1	1.15374	1	1.20027	1.24594	1	1.02534	1	1	1	1	1	1.21771	1	1.09201	1.58938	1.29274	1.41998	1.50941	1	1	1	1.52351
CROONQUIST_NRAS_VS_STROMAL_STIMULATION_UP_Up	1	1	1	1	1.25692	1	1.21577	1	1	1.2315	1.23461	1	1	1	1	1	1	1	1	1.13444	1	1	1	1	1	1	1	1	1	1	1	1.18951	1.65029	1	1	1	1	1.1022	1	1	1	1	1	1	1.31074	1.46885	1
CROONQUIST_STROMAL_STIMULATION_UP_Down	1	1	1.53137	1	1	1.39763	1	1	2.07125	1	1.18264	1	1.39983	1	1	1	1	1	1	1	1	1	1.40389	1.25812	1	1.5824	1	1	1	1.50238	1	1.73246	1.53249	1	2.09392	1.69672	1.11429	1	1	1	1.03966	1	1.52008	1	1	1.61464	1.82493
CROONQUIST_STROMAL_STIMULATION_UP_Up	1.0131	1.35212	1	1.61335	1.67864	1	2.03243	1.50895	1	1.40935	1	1.35247	1	1.21433	1	1.35167	1.05347	1.59981	1.45913	2.13156	2.15182	1.68826	1	1	1.99284	1	1.38022	1	1.21022	1	1.47018	1	1	1	1	1	1	1.74883	1.47278	1.77134	1	1.1828	1	2.2311	1.78015	1	1
CUI_GLUCOSE_DEPRIVATION_Down	1.42317	1.07691	1.26813	1	1	1	1	1	1	1	1	1	1	1	1	1	1	1	1	1	1.09898	1	1	1	1	1	1	1	1	1	1	1	1	1.24352	1	1	1	1.00316	1	1	1	1	1.24771	1	1	1	1
CUI_GLUCOSE_DEPRIVATION_Up	1	1	1	1	1	1	1	1.08803	1	1.13721	1	2.00151	1.18642	1.23144	1.18157	1	1	1	1	1	1	1	1	1.00268	1.14528	1.12486	1	1.12789	1	1.01974	1.13311	1	2.01426	1	1	1	1	1	1.71552	1	1	1	1	1.27678	1.19028	1.24682	1
CUI_TCF21_TARGETS_2_DN_Down	1.07206	1.34612	1	1.04852	1	1.31583	1	1.6663	2.05418	1.1244	1.33026	1	2.8122	1.89466	2.51385	1	1	1	1.18188	1	1	1.99074	1.03046	1	1.25222	1	1	1	1	1.6052	1	1	1.45815	1.01937	1	1	1	1	1	1	2.36254	1.96257	1	1	1	1	1.4971
CUI_TCF21_TARGETS_2_DN_Up	1	1	1.08775	1	1	1	1.68294	1	1	1	1	1	1	1	1	1.07247	1	1.25485	1	1.38355	1.13847	1	1	1.08097	1	1	1	1	1.03585	1	1.26585	1.40076	1	1	1.72043	1.60051	1.43146	1.68781	1.1045	1.10665	1	1	1.09359	1.43391	1.2599	1.24614	1
CUI_TCF21_TARGETS_2_UP_Down	1	1	1	1.41796	1	1.4929	1	1	1	1.26853	1.71941	1.93654	1	1	1	1.00205	1	1	1.14326	1	1	1	1	1.383	1	1.68048	1	1	1	1.21986	1	1.67561	1	1.21499	2.23045	1.56642	1	2.01671	1	1	1	1	1	1	1	1	1.44919
CUI_TCF21_TARGETS_2_UP_Up	1.07105	1.1352	1.00949	1	1	1	1.75545	1.60743	1.244	1	1	1	1.70645	1.20874	1.4845	1	1.35791	1.49033	1	1.84175	1.78398	1.81472	1	1	2.05607	1	1.12016	1	1.52159	1	1.82775	1	1.07164	1	1	1	1	1	1.34901	1.13083	1.18898	1.43931	1.00976	1.76831	1.57422	1	1
CUI_TCF21_TARGETS_DN_Down	1	1	1	1	1	1	1	1	1.42146	1	1	1	1.81035	1	1.1353	1.22958	1	1	1.77558	1	1.35528	1.32874	1	1	1	1	1	1.06943	1	1	1	1	1	1	1	1	1	1	1	1	1.8182	1	1	1	1	1	1
CUI_TCF21_TARGETS_DN_Up	1	1	1	1	1	1	1	1	1	1.40211	1	1.53036	1	1.23746	1	1	1.31538	1.11337	1	1.39746	1	1	1	1	1	1	1.53935	1	1.08593	1	1	1.40435	1	1	1.39203	1.04511	1	1	1	1	1	1	1	1	1	1.65051	1
CUI_TCF21_TARGETS_UP_Down	1	1.05304	1	1.3046	1	1.16852	1	1	1.29226	1.05832	1.63204	1.90699	1	1	1	1	1	1	1.51737	1	1	1	1	1.3774	1	1.59032	1	1	1	1.05874	1	1.36303	1.48778	1.2523	1.93236	1.21298	1	1	1	1	1.21177	1	1	1	1	1.14484	1.69013
CUI_TCF21_TARGETS_UP_Up	1	1	1.12658	1	1	1	1.96192	1.2606	1	1	1	1	1	1.2566	1	1.13863	1.6903	1.70127	1	2.00548	1.65139	1.55399	1	1	1.3962	1	1.12534	1	1.78428	1	2.17333	1	1	1	1	1	1	1	1	1.38602	1	1.28095	1.10559	1.85666	1.85272	1	1
DACOSTA_ERCC3_ALLELE_XPCS_VS_TTD_DN_Down	1.74665	1.71116	1.78593	1	1	1	1	1	1.68258	1.35284	1.281	1.71398	1.34087	1	1.45068	1	1	1	1.39222	1	1	1	1.35488	1.31668	1	1.25329	1	1	1	1.22555	1	1	1	1	1.01429	1	1.26186	1	1	1	1.37048	1	1.81645	1	1	1	1.18683
DACOSTA_ERCC3_ALLELE_XPCS_VS_TTD_DN_Up	1	1	1	1.08522	1.40937	1	1.77536	1	1	1	1	1	1	1	1	1	1.09598	1.19528	1	1.69367	1.3296	1.09432	1	1	1.18825	1	1.04183	1	1.49069	1	1.31693	1	1	1.10254	1	1.43654	1	1	1	1.29966	1	1	1	1.58714	1.42219	1	1
DACOSTA_ERCC3_ALLELE_XPCS_VS_TTD_UP_Down	1	1	1	1	1	1	1	1	1.07228	1.08713	1.07021	1.05894	1	1	1	1.2072	1	1	1.23698	1	1	1	1	1	1	1.07784	1	1.28738	1	1	1	1.23477	1.02816	1	1	1	1	1	1	1.39463	1	1.32475	1	1	1	1	1.77414
DACOSTA_ERCC3_ALLELE_XPCS_VS_TTD_UP_Up	1	1	1	1	1.50574	1	1.35093	1	1	1	1	1	1	1	1.08273	1	1.10795	1.55923	1	1.55456	1.38641	1.58649	1	1	1	1	1	1	1	1	1.04294	1	1	1	1	1	1	1	1	1	1	1	1	1.41878	1.20955	1.45569	1
DACOSTA_UV_RESPONSE_VIA_ERCC3_COMMON_DN_Down	1	1.06832	1	2.01663	1	1.39492	1	2.15352	1.58623	2.35862	1.96836	1.49991	2.69176	2.74517	2.96288	1	1	1	1	1	1	2.52799	1	1	1	1	1.40541	1	1	2.09776	1	1	1.29556	1	1	1	1	1	1	1	2.20906	1.7065	1	1	1	1	1.46698
DACOSTA_UV_RESPONSE_VIA_ERCC3_COMMON_DN_Up	1	1	1.68502	1	1	1	1	1	1	1	1	1	1	1	1	1	1	1	1	1	1	1	1	1.44304	1	1	1	1	1	1	1	1	1	1.1419	1.8516	1.66583	1.41252	1	1	1	1	1	1.65517	1	1	1.01902	1
DACOSTA_UV_RESPONSE_VIA_ERCC3_COMMON_UP_Down	1.44044	1.07878	1.68045	1.34051	1	1.24031	1	1	1	1	1.07234	1	1	1	1	1.11347	1	1.29414	1	1	1	1	1	1	1	1	1	1	1	1	1.25625	1.01615	1	1	1.29788	1	1	1	1.49573	1.31188	1	1	1.71937	1	1	1.58995	1
DACOSTA_UV_RESPONSE_VIA_ERCC3_COMMON_UP_Up	1	1	1	1	1	1	1.15889	1.65996	1	1.66425	1	1.34086	1.61183	1.12986	1.54034	1	1	1	1.36095	1.31458	1.458	1.33482	1	1	1.14852	1	1	1	1	1.08118	1	1	1	1.04881	1	1	1	1	1	1	1.02994	1	1	1	1	1	1
DACOSTA_UV_RESPONSE_VIA_ERCC3_DN_Down	1	1.13304	1	2.03378	1	1.29454	1	2.14162	1.71345	2.36395	2.0005	1.55395	2.99054	2.73023	3.13831	1	1	1	1	1	1	2.6799	1	1	1	1	1.49344	1	1	2.01833	1	1	1.39692	1	1	1	1	1	1	1	2.32959	1.72595	1	1	1	1	1.43227
DACOSTA_UV_RESPONSE_VIA_ERCC3_DN_Up	1	1	1.62135	1	1	1	1	1	1	1	1	1	1	1	1	1	1	1	1	1	1	1	1	1.49248	1	1	1	1	1	1	1	1	1	1.02751	1.83239	1.68543	1.48823	1	1	1.11451	1	1	1.61226	1.06586	1	1	1
DACOSTA_UV_RESPONSE_VIA_ERCC3_TTD_DN_Down	1.08958	1.1185	1	1.38396	1	1.27492	1	2.22856	1.57857	2.0465	1.5352	1.50071	2.4041	2.08902	2.34501	1	1.14326	1	1.0633	1	1	2.25434	1	1	1	1.42625	1.26878	1.10487	1.15261	1.88657	1	1	1	1	1	1	1	1	1	1	1.97238	1.51149	1	1	1	1	1.47337
DACOSTA_UV_RESPONSE_VIA_ERCC3_TTD_DN_Up	1	1	1	1	1	1	1.19647	1	1	1	1	1	1	1	1	1	1	1	1	1	1	1	1	1.24247	1	1	1	1	1	1	1	1	1	1	1.18503	1.72924	1	1	1.18563	1.24955	1	1	1	1.20437	1.23825	1.05468	1
DACOSTA_UV_RESPONSE_VIA_ERCC3_TTD_UP_Down	1	1	1.0348	1	1	1.46899	1	1	1	1	1.00333	1.2454	1	1	1	1	1	1	1.07748	1	1	1	1	1.11097	1	1	1	1	1	1	1	1	1	1	1.63599	1.00358	1	1	1	1	1	1	1.0399	1	1	1.39817	1
DACOSTA_UV_RESPONSE_VIA_ERCC3_TTD_UP_Up	1	1.25226	1	1	1	1	1.16236	1	1	1	1	1	1.68632	1.59412	1.76703	1.13718	1	1.02011	1	1.57343	1.21162	1.69343	1	1	1.24916	1	1	1	1.08377	1	1.01738	1	1	1.2276	1	1	1.58733	1.34542	1.13594	1	1.08689	1	1	1.33257	1	1	1
DACOSTA_UV_RESPONSE_VIA_ERCC3_UP_Down	1.28992	1	1.83039	1.21457	1	1.24127	1	1	1	1	1.03249	1	1	1	1	1	1	1.14295	1	1	1	1	1	1.18511	1	1	1	1	1	1	1	1.08385	1	1	1.60434	1.1307	1	1	1	1.00522	1	1	1.82386	1	1	1.19009	1
DACOSTA_UV_RESPONSE_VIA_ERCC3_UP_Up	1	1	1	1	1	1	1.053	1.88147	1.19995	1.61463	1	1.02175	2.27358	1.7715	2.18674	1	1	1	1	1.18577	1.1141	1.91797	1	1	1.3717	1.13231	1.11008	1	1	1.23015	1	1	1	1	1	1	1	1	1.11756	1	1.43566	1.08335	1	1.1286	1	1	1
DACOSTA_UV_RESPONSE_VIA_ERCC3_XPCS_DN_Down	1	1	1	1.16389	1	1.17459	1	2.08871	1.36913	1.75483	1.33605	1.26351	2.76443	2.24914	2.62992	1	1.02383	1	1	1	1	2.33772	1	1	1.24566	1	1	1	1.01296	1.8782	1	1	1.47588	1	1	1	1	1	1	1	1.87117	1.57857	1	1	1	1	1
DACOSTA_UV_RESPONSE_VIA_ERCC3_XPCS_DN_Up	1	1	1.17426	1	1	1	1	1	1	1	1	1	1	1	1	1.00215	1	1	1	1	1	1	1	1.39147	1	1	1	1	1	1	1	1	1	1	1.20902	1.45306	1.44239	1	1	1	1	1	1.19205	1	1	1	1
DACOSTA_UV_RESPONSE_VIA_ERCC3_XPCS_UP_Down	1.04068	1.04425	1	1.68938	1.62713	1.36797	1	1	1.5221	1.22236	1.34641	1.33975	1	1	1	1	1	1	1.31703	1	1.10175	1	1	1	1	1	1	1	1	1	1	1	1	1	1.1431	1	1	1.7328	1	1	1.36675	1.17137	1	1	1.18408	1	1.08156
DACOSTA_UV_RESPONSE_VIA_ERCC3_XPCS_UP_Up	1	1	1	1	1	1	1	1	1	1	1	1	1	1	1	1	1	1	1	1.19715	1	1	1	1	1	1	1	1	1.00183	1.36146	1	1	1	1	1	1	1	1	1.41464	1	1	1	1	1	1	1	1
DAIRKEE_CANCER_PRONE_RESPONSE_BPA_Down	1	1	1.108	1	1	1	1	1	1	1	1.06717	1	1	1	1	1.41241	1	1.34699	1	1	1.06918	1.05358	1	1	1	1	1.192	1	1	1	1	1	1	1	1	1.00853	1	1.6179	1.027	1	1	1	1.10045	1	1	1	1.18213
DAIRKEE_CANCER_PRONE_RESPONSE_BPA_E2_Down	1	1	1	1	1	1	1	1	1	1	1.45221	1	1	1	1	1.13874	1	1.15563	1	1	1.0073	1	1	1.13672	1	1	1	1.12645	1	1	1	1	1	1	1	1	1	1.14342	1.10421	1	1	1	1	1	1	1	1
DAIRKEE_CANCER_PRONE_RESPONSE_BPA_E2_Up	1	1	1	1	1	1	1	1.05341	1	1	1	1.07768	1.5817	1.35031	1.52355	1	1	1	1	1	1	1.06648	1	1	1	1	1.07335	1	1	1	1	1	1.28226	1.02417	1	1	1.13687	1	1	1	1	1	1	1.13308	1	1	1
DAIRKEE_CANCER_PRONE_RESPONSE_BPA_Up	1	1	1	1	1	1.38781	1.08645	1	1.04457	1	1	1	1	1	1	1	1.27668	1	1	1	1	1	1	1	1.16679	1	1	1	1	1.22275	1	1	1.24478	1	1	1	1.30524	1	1	1	1	1	1	1	1	1	1
DAIRKEE_CANCER_PRONE_RESPONSE_E2_Down	1	1	1	1	1	1	1	1	1	1.34196	1	1.55471	1	1	1	1	1	1	1	1	1	1	1.04604	1	1	1	1	1.0474	1.75476	1	1	1	1	1.18479	1	1	1	1	1	1	1	1	1	1	1	1	1.01354
DAIRKEE_CANCER_PRONE_RESPONSE_E2_Up	1	1	1	1	1	1	1	1	1.22921	1	1	1	1	1	1	1	1	1	1	1.01842	1	1	1	1.11197	1	1	1	1	1	1	1	1	1	1	1	1	1	1	1.14336	1	1	1	1	1.38499	1	1	1
DAIRKEE_TERT_TARGETS_DN_Down	1.18766	1.32126	1	1	1	1	1	1.44654	1	1.48022	1.18574	1.52276	1.5909	1.35605	1.54802	1	1	1	1	1	1	1.44739	1.17167	1	1	1.47639	1.09872	1.27922	1	1.49315	1	1.01896	1.08439	1	1	1	1	1	1.1084	1	1.22139	1.19822	1	1	1	1	1.09079
DAIRKEE_TERT_TARGETS_DN_Up	1	1	1	1	1.03501	1	1	1	1	1	1	1	1	1	1	1	1.00582	1	1	1	1	1	1	1	1	1	1	1	1	1	1	1	1	1	1.02632	1	1.17316	1	1	1	1	1	1	1.20346	1.0847	1	1
DAIRKEE_TERT_TARGETS_UP_Down	1	1	1.37139	1	1	1	1	1	1	1	1	1	1	1	1	1	1	1	1	1	1	1	1	1	1	1	1	1	1	1	1	1	1	1	1.02566	1	1	1.1796	1	1	1	1	1.37934	1	1	1.31997	1
DAIRKEE_TERT_TARGETS_UP_Up	1	1.06298	1	1.02396	1	1.13547	1	1.4812	1.54654	1.32989	1	1.08401	2.45954	1.7831	2.3883	1	1	1	1	1	1	2.09173	1	1	1.18658	1	1.06679	1	1	1.28507	1	1	1	1	1	1	1	1	1	1	1.95957	1.55933	1	1.0997	1	1	1
DANG_BOUND_BY_MYC_Down	1.0932	1	1.13757	1	1	1	1	1	1	1	1.26914	1	1	1	1	1	1	1.15936	1	1	1	1	1	1	1	1	1	1	1	1	1	1	1	1	1	1.08531	1	1.17967	1	1	1	1	1.13692	1	1	1	1
DANG_BOUND_BY_MYC_Up	1	1	1	1	1	1	1	1.51435	1	1	1	1	1.85251	1.25546	1.71972	1	1	1	1	1	1	1.40061	1	1	1.456	1	1	1	1	1.15784	1	1	1	1	1	1	1	1	1	1	1.03948	1	1	1	1	1	1
DANG_MYC_TARGETS_DN_Down	1.45869	1	1.95502	1	1	1.13983	1	1	1	1	1.06675	1	1	1	1	1	1.27579	1	1	1	1	1	1	1	1	1	1	1	1	1	1	1	1	1.19929	1	1	1	1	1	1	1.27347	1.00428	1.96837	1	1	1	1
DANG_MYC_TARGETS_DN_Up	1	1	1	1	1	1	1.52503	1.75988	1	1.29987	1	1.41854	1	1	1	1	1	1	1	1.12711	1	1	1	1	1.45773	1.36244	1.14507	1	1	1	1	1.10674	1	1	1	1.76846	1.05694	1.10336	1.0416	1	1	1	1	1.4561	1	1	1.30886
DANG_MYC_TARGETS_UP_Down	1.17569	1	1.28101	1.0997	1.89265	1	1	1	1	1	1.54599	1	1	1	1	1	1	1	1	1	1	1	1	1	1	1	1.19061	1	1	1	1	1	1	1	1	1.25317	1	1.6962	1.73529	1	1	1	1.29537	1	1	1	1
DANG_MYC_TARGETS_UP_Up	1	1	1	1	1	1	1	1.89025	1.10128	1	1	1	2.30038	1.31516	2.11432	1	1	1	1	1	1	1.72328	1	1	1.31116	1	1	1	1.06779	1.10136	1	1	1	1.21243	1	1	1	1	1	1	1	1	1	1	1	1	1
DANG_REGULATED_BY_MYC_DN_Down	1.18976	1	1.61425	1	1	1.11337	1	1	1.50594	1	1.41311	1	1	1	1	1	1	1	1.16976	1	1	1	1	1.06362	1	1	1	1	1	1.22211	1	1.14114	1	1	1.40166	1	1	1	1	1	1.65481	1	1.60205	1	1	1	1.34236
DANG_REGULATED_BY_MYC_DN_Up	1	1	1	1	1	1	1.80275	1.2948	1	1.02519	1	1	1	1	1	1.50698	1.31517	2.17575	1	1.94002	1.89958	1.30976	1	1	1.16039	1	1.2248	1	1.30032	1	1.67023	1	1	1	1	1	1.00035	2.03827	1.89129	1.49214	1	1	1	2.0264	1.60042	1	1
DANG_REGULATED_BY_MYC_UP_Down	1	1	1.21097	1.0805	1.49317	1	1.11008	1	1.00166	1	1	1	1	1	1	1	1	1	1	1.03908	1	1	1	1	1	1	1.08261	1	1	1	1	1	1	1	1	1	1	2.07617	1.52072	1.08616	1	1	1.19737	1	1	1	1
DANG_REGULATED_BY_MYC_UP_Up	1	1	1	1	1	1	1	1.75092	1	1	1	1	1.69398	1	1.33546	1	1	1	1	1	1	1.01005	1	1	1.18314	1	1	1	1	1	1	1	1	1	1	1	1	1	1	1	1	1	1	1	1	1	1
DARWICHE_PAPILLOMA_PROGRESSION_RISK_Down	1	1	1	1	1	1.03687	1	1.00935	1	1	1	1	1.16058	1.06213	1.20809	1	1	1	1	1	1	1	1.19947	1	1	1	1	1	1	1	1	1	1.02263	1	1	1	1	1	1	1.18027	1	1	1	1	1	1	1
DARWICHE_PAPILLOMA_PROGRESSION_RISK_Up	1	1.22523	1	1.08059	1.33529	1	1	1	1	1	1	1	1	1	1	1.26029	1	1.22383	1	1.46786	1.36364	1	1	1	1	1.0488	1.17325	1.28995	1	1.37372	1.1872	1.47134	1	1.26288	1.17926	1.14186	1.42955	1.20543	1	1	1.16351	1	1	1.29051	1.28165	1.09306	1.04637
DARWICHE_PAPILLOMA_RISK_HIGH_DN_Down	1	1	1.14561	1	1	1	1	1	1	1	1	1	1	1	1	1	1	1	1	1	1	1	1	1	1	1	1	1	1.17213	1	1	1.18718	1.03198	1	1.69194	1	1	1.01407	1	1	1	1	1.15229	1	1	1	1.04996
DARWICHE_PAPILLOMA_RISK_HIGH_DN_Up	1	1	1	1.35699	1	1	1	1.09535	1	1.24226	1	1	1.39123	1	1.14854	1	1	1	1.38547	1.35932	1.66904	1.36957	1	1	1.42736	1	1.0766	1	1	1	1	1	1	1	1	1.05556	1.20079	1	1	1	1.3143	1.17941	1	1	1	1	1
DARWICHE_PAPILLOMA_RISK_HIGH_UP_Down	1.25039	1	1.39695	1	1	1	1	1	1	1	1.03294	1	1	1	1	1	1	1	1	1	1	1	1	1	1	1.2324	1	1	1	1	1	1	1	1	1	1	1	1	1	1.01472	1	1	1.37309	1	1	1	1
DARWICHE_PAPILLOMA_RISK_HIGH_UP_Up	1	1	1	1	1	1	1.19201	1.16545	1	1.24973	1	1	1.62236	1.21647	1.35188	1	1	1	1	1.27749	1.40721	1.58096	1	1	1.29392	1	1	1	1	1	1	1	1.29074	1	1	1	1	1.01769	1	1	1	1	1	1.36224	1.301	1.09769	1.28275
DARWICHE_PAPILLOMA_RISK_HIGH_VS_LOW_DN_Down	1	1	1	1	1	1	1	1	1	1	1	1	1	1.4353	1.25705	1.21999	1	1.2228	1	1	1	1.39096	1.53788	1	1	1.0609	1.34375	1.33969	1	1	1	1	1	1	1	1	1	1	1	1	1	1	1	1	1	1	1
DARWICHE_PAPILLOMA_RISK_HIGH_VS_LOW_DN_Up	1	1	1	1	1.33139	1	1	1	1	1	1.18454	1	1	1	1	1	1	1	1	1	1	1	1	1	1	1	1	1	1	1	1	1.19367	1	1	1	1.06291	1.32517	1	1	1	1	1.05669	1	1	1	1	1
DARWICHE_PAPILLOMA_RISK_LOW_DN_Down	1	1	1.26764	1	1	1.00382	1	1	1	1	1	1	1	1	1	1	1	1.0831	1	1	1	1	1	1	1	1	1	1	1	1.01456	1	1.27699	1	1.17962	1.49777	1	1	1.38429	1	1.12806	1	1	1.26668	1	1	1	1
DARWICHE_PAPILLOMA_RISK_LOW_DN_Up	1	1.2652	1	1.25095	1	1	1.16275	1.08605	1	1.13058	1	1	1.40309	1.08211	1.19059	1	1	1	1.52047	1.52583	1.85786	1.50128	1	1	1.34472	1.05132	1.05695	1	1	1	1.20419	1	1	1	1	1.1427	1	1	1	1	1.30895	1	1	1.16055	1	1	1
DARWICHE_PAPILLOMA_RISK_LOW_UP_Down	1.27341	1	1.28699	1	1	1	1	1	1	1	1	1	1	1	1	1	1	1	1	1	1	1	1	1	1	1.2292	1	1	1	1	1	1	1	1	1	1	1	1	1	1	1	1	1.29551	1	1	1	1
DARWICHE_PAPILLOMA_RISK_LOW_UP_Up	1	1	1	1.04981	1	1.13	1	1.26903	1.08523	1.3586	1	1	1.60236	1.01894	1.33664	1	1	1	1	1	1.03204	1.31176	1	1	1.30069	1	1	1	1	1	1	1	1.22913	1	1	1	1.30094	1.38341	1	1	1	1	1	1.08968	1.21172	1.08143	1.15637
DARWICHE_SKIN_TUMOR_PROMOTER_DN_Down	1	1	1	1	1	1	1	1	1	1	1	1	1	1	1	1	1	1	1	1	1	1	1	1	1	1	1	1	1	1	1	1.1328	1	1.10469	1.35731	1	1	1.2091	1	1	1	1	1	1	1	1	1
DARWICHE_SKIN_TUMOR_PROMOTER_DN_Up	1	1	1	1.33348	1	1	1	1.1752	1	1.02058	1	1	1.49463	1	1.19292	1	1	1	1.41701	1.07681	1.39917	1.36368	1	1	1.47707	1	1	1	1	1	1	1	1	1	1	1	1.26134	1	1	1	1.3154	1.17581	1	1	1	1	1
DARWICHE_SKIN_TUMOR_PROMOTER_UP_Down	1.26292	1	1.55525	1	1	1	1	1	1	1	1	1	1	1	1	1	1	1	1	1	1	1	1	1	1	1.1363	1	1	1.0666	1	1	1	1	1	1.11747	1	1	1	1	1.01791	1	1	1.56439	1	1	1	1
DARWICHE_SKIN_TUMOR_PROMOTER_UP_Up	1	1	1	1	1	1	1.26225	1.11641	1	1.45575	1	1.00061	1.49686	1.1992	1.34247	1	1	1	1	1.70968	1.7325	1.60107	1	1	1.24904	1	1.11667	1	1	1	1.18565	1	1.08532	1	1	1	1	1.37606	1	1	1	1	1	1.31918	1.22202	1	1
DARWICHE_SQUAMOUS_CELL_CARCINOMA_DN_Down	1	1	1	1	1	1	1	1	1	1	1	1	1	1	1	1	1	1	1	1	1	1	1.04446	1	1	1	1	1	1	1	1	1.2854	1	1	1.74146	1	1	1	1	1	1	1	1	1	1	1	1
DARWICHE_SQUAMOUS_CELL_CARCINOMA_DN_Up	1	1	1	1.35271	1	1	1.06281	1.10852	1	1.15653	1	1	1.40671	1	1.14862	1	1	1	1.39979	1.1324	1.39502	1.33936	1	1	1.3527	1	1	1	1	1	1	1	1	1	1	1	1.23888	1	1	1	1.4797	1.29829	1	1	1	1	1
DARWICHE_SQUAMOUS_CELL_CARCINOMA_UP_Down	1.29616	1	1.61822	1	1	1	1	1	1	1	1	1	1	1	1	1	1	1	1	1	1	1	1	1	1	1.06667	1	1	1	1	1	1	1	1.07366	1	1	1	1	1.08424	1.11534	1	1	1.62274	1	1	1	1
DARWICHE_SQUAMOUS_CELL_CARCINOMA_UP_Up	1	1.05356	1	1.00583	1	1	1.07069	1.16905	1	1.35868	1	1.13793	1.58668	1.25251	1.37037	1	1	1	1	1.53118	1.71796	1.60789	1	1	1.43345	1	1	1	1	1	1.22395	1	1.3638	1	1	1.27067	1	1	1	1	1	1	1	1.28741	1.2431	1.10972	1.13051
DASU_IL6_SIGNALING_SCAR_UP_Down	1	1	1	1.33949	1	1.16561	1	1	1	1	1	1.4058	1.18387	1	1	1.00605	1	1	1	1	1	1	1	1.46233	1	1	1	1	1	1.47065	1	1	1.47978	1	1	1	1.02458	1	1	1	1.13136	1	1	1	1	1	1.8819
DASU_IL6_SIGNALING_SCAR_UP_Up	1.27186	1.50602	1	1	1	1	1.67642	1	1	1	1	1	1	1	1	1	1.12874	1	1.16862	1.39957	1.46783	1	1	1	1.57197	1	1	1	1.20879	1	1.31876	1.20845	1	1.0129	1.51957	1.19099	1	1	1	1.7637	1	1.40602	1	1.33787	1.29367	1	1
DASU_IL6_SIGNALING_UP_Down	1	1	1.50805	1	1	1.46769	1	1	1	1	1	1.1252	1	1	1	1.0871	1	1.06497	1	1	1	1	1.35729	1.35703	1	1	1	1	1	1	1	1	1.02826	1	1.01405	1.01604	1	1	1	1.45793	1	1.07333	1.50894	1	1	1	1.13459
DASU_IL6_SIGNALING_UP_Up	1	1	1	1	1.10817	1	1.62502	1.09094	1	1.18259	1	1	1	1.04738	1	1	1.05189	1	1	1.697	1.55948	1.08204	1	1	1.41214	1	1	1	1	1	1.11295	1	1	1.01331	1	1	1	1	1.41108	1	1	1	1	1.50109	1.37861	1	1
DAUER_STAT3_TARGETS_DN_Down	1	1.06277	1	1.08033	1	1	1	1	1.52248	1	1.48846	1	1.03045	1	1	1	1	1	1.33842	1	1	1	1.56745	1.33284	1.13036	1.09652	1.19275	1.39746	1	1	1	1	1	1	1	1.34116	1.0571	1	1	1	2.5918	2.19783	1	1	1	1	1
DAUER_STAT3_TARGETS_DN_Up	1	1	1.07036	1	1.49097	1	1	1.05428	1	1.1012	1	1.14384	1	1.46999	1.30364	1.01512	1	1.21363	1	1.62509	1.12166	1.25668	1	1	1	1	1	1	1	1.09125	1	1.04574	1	1.29134	1	1	1	1.36691	1.08391	1	1	1	1.08015	1	1.17129	1.3889	1.44724
DAUER_STAT3_TARGETS_UP_Down	1	1	1	1	1	1	1	1	1.26286	1	1	1	1.46376	1.45194	1.72347	1	1.6201	1	1.06153	1	1	1.40231	1	1	1	1.00909	1	1	1.61198	1.75733	1	1	1.24084	1	1	1	1	1	1	1	1.92735	2.19336	1	1	1	1	1.47154
DAUER_STAT3_TARGETS_UP_Up	1	1.38529	1	1	1	1	1.76328	1.31881	1	1.27044	1.32501	1.03977	1	1	1	1.57643	1	1.20348	1	1.58245	1.22062	1	1	1.19477	1.7414	1	1.20651	1	1	1	1.09199	1	1	1.24449	1.08887	1.75272	1.10746	1.79338	1.37535	1	1	1	1	1.80611	1.48498	1.48294	1
DAVICIONI_MOLECULAR_ARMS_VS_ERMS_DN_Down	1.23861	1	1.58229	1.47439	1	2.09593	1	1	1	1	1.38968	1.54122	1	1	1	1	1.16669	1	1.62133	1	1	1	1	1.10379	1	1.20532	1	1	1	1	1	1.06777	1	1	1.67939	1.1442	1	1	1	1	1	1	1.59562	1	1	1.10646	1.38876
DAVICIONI_MOLECULAR_ARMS_VS_ERMS_DN_Up	1	1	1	1	1	1	2.04723	1.5214	1	1.4797	1	1	1	1.43021	1	1.62338	1	1.65773	1	2.03259	1.51166	1.54136	1	1	1.64214	1	1.68918	1	1.19424	1.06038	1.8316	1	1.34751	1.06641	1	1	1.04589	1.46722	1.04469	1.58747	1	1.44337	1	2.27557	1.79179	1	1
DAVICIONI_MOLECULAR_ARMS_VS_ERMS_UP_Down	1	1.07185	1	1.21454	1	1	1	1.37788	1	1.0681	1.32129	1	1.31545	1.34594	1.4199	1.04351	1	1	1	1	1	1.35159	1	1	1.04715	1.0948	1	1.02551	1.04442	1.24571	1	1	1	1	1	1	1	1	1	1	1.54287	1.19874	1	1.28415	1.05707	1	1.16571
DAVICIONI_MOLECULAR_ARMS_VS_ERMS_UP_Up	1	1	1	1	1	1	1	1	1	1	1	1	1	1	1	1	1	1	1	1	1	1	1.09969	1	1	1	1	1	1	1	1	1	1	1	1	1.15405	1.29881	1	1.05146	1.02729	1	1	1	1	1	1	1
DAVICIONI_PAX_FOXO1_SIGNATURE_IN_ARMS_UP_Down	1.01396	1	1.03909	1	1	1.1267	1	1	1	1	1.1134	1.24092	1	1	1	1.15417	1	1	1.37157	1	1.20256	1	1	1	1.05663	1.14224	1	1	1	1	1.0405	1	1	1	1.22803	1	1	1	1	1	1.53705	1.03922	1.03703	1	1.14151	1.02317	1.00897
DAVICIONI_PAX_FOXO1_SIGNATURE_IN_ARMS_UP_Up	1	1	1	1	1	1	1.29829	1.10303	1	1	1	1	1.86248	1	1.31724	1	1.35279	1.31531	1	1.16665	1	1	1.00527	1.23724	1	1	1	1	1	1.02913	1	1	1.40392	1	1	1	1.44359	1.10978	1.17386	1.43586	1	1	1	1	1	1	1
DAVICIONI_RHABDOMYOSARCOMA_PAX_FOXO1_FUSION_UP_Down	1.26289	1.19928	1.12992	1	1	1.17706	1	1	1.0502	1	1.64817	1.43417	1	1	1	1.0002	1	1	1.00667	1	1	1	1	1	1	1	1	1	1	1.07233	1	1	1	1	1	1	1	1	1	1	1.66578	1.14163	1.11628	1.31613	1.29314	1.28064	1
DAVICIONI_RHABDOMYOSARCOMA_PAX_FOXO1_FUSION_UP_Up	1	1	1	1	1	1	1.2852	1	1	1	1	1	1.89453	1	1.37717	1	1.15582	1.29002	1	1.20294	1.04471	1.26648	1	1.25329	1	1	1	1.06307	1	1	1	1.11003	1.40588	1	1	1.05974	1.23102	1	1.3588	1.47688	1	1	1	1	1	1	1
DAVICIONI_TARGETS_OF_PAX_FOXO1_FUSIONS_DN_Down	1	1	1	1	1	1	1	1.45113	1	1.07216	1.2163	1.22129	1.90744	1.28649	1.51093	1	1	1	1	1	1	1.09691	1.09488	1.05185	1.17331	1	1.24653	1.25586	1	1.42425	1	1.39185	1.27846	1	1.43596	1	1	1	1	1	1.68032	1	1	1	1	1	1.68961
DAVICIONI_TARGETS_OF_PAX_FOXO1_FUSIONS_DN_Up	1.08439	1	1	1.05969	1.00416	1.58534	1.67964	1	1	1	1	1	1	1	1	1	1	1	1.25986	1.20148	1.45406	1	1	1	1	1	1	1	1	1	1	1	1	1	1	1	1	1.44521	1.06624	1.29363	1	1.05214	1	1.56326	1.56514	1	1
DAVICIONI_TARGETS_OF_PAX_FOXO1_FUSIONS_UP_Down	1.26205	1	1.40452	1	1	1.36374	1	1	1.29847	1	1.31087	1.46488	1	1	1	1	1	1	1.13527	1	1	1	1	1	1	1.03108	1.00282	1	1	1.3985	1	1.05235	1.1014	1.06558	1.56181	1	1	1	1	1	1.34875	1	1.40624	1	1	1	1.48311
DAVICIONI_TARGETS_OF_PAX_FOXO1_FUSIONS_UP_Up	1	1	1	1.04146	1	1	1.87251	1.3046	1	1.1939	1	1	1	1.09571	1	1.33945	1.33138	1.60651	1	1.74912	1.74002	1.39148	1	1	1.12684	1	1	1	1.14461	1	1.24105	1	1	1	1	1.33396	1.30464	1.94857	1.27734	1.88769	1	1.25138	1	1.85139	1.40063	1	1
DAWSON_METHYLATED_IN_LYMPHOMA_TCL1_Down	1	1	1	1	1	1.24118	1	1.5083	1.14794	1.14061	1.17187	1	1.3844	1.04311	1.0347	1.18285	1	1	1	1	1	1	1	1	1.08199	1.22306	1	1.06903	1	1.845	1	1.59696	2.13746	1	1	1	1	1	1	1	1.88774	1.4413	1	1	1	1	1.15562
DAWSON_METHYLATED_IN_LYMPHOMA_TCL1_Up	1.35586	1	1.5935	1.19759	1	1	1.09405	1	1	1	1	1	1	1	1	1	1	1	1.38899	1.23598	1.49196	1.12946	1	1.09448	1	1	1	1	1	1	1	1	1	1	1	1	1.57508	1	1	1.59409	1	1	1.59709	1.00456	1.24136	1	1
DAZARD_RESPONSE_TO_UV_NHEK_DN_Down	1	1.23838	1	1.58083	1	1.39802	1	2.06269	1.27725	2.23568	1.89413	1.68957	2.88285	2.88777	3.05712	1	1	1	1	1	1	2.89009	1	1	1	1	1.45364	1	1.20327	1.96773	1.29896	1	1.27873	1	1	1	1	1.2108	1	1	2.06617	1.77014	1	1	1	1	1.3337
DAZARD_RESPONSE_TO_UV_NHEK_DN_Up	1	1	1.27399	1	1	1	1	1	1	1	1	1	1	1	1	1	1	1	1	1	1	1	1.07097	1.35179	1.03602	1	1	1	1	1	1	1	1	1.06722	1.66826	1.62337	1.43005	1	1	1	1	1	1.26291	1	1	1.04624	1
DAZARD_RESPONSE_TO_UV_NHEK_UP_Down	1.62431	1.21038	1.97717	1	1	1.01785	1	1	1	1	1.03035	1	1	1	1	1	1.09648	1.16954	1	1	1	1	1.33589	1.33909	1	1.03139	1	1	1.1351	1	1	1	1	1	1.16192	1.50888	1	1	1	1.36013	1	1.29957	1.9625	1	1	1.2375	1
DAZARD_RESPONSE_TO_UV_NHEK_UP_Up	1	1	1	1.8496	1.33184	1	1.26526	1.4052	1.04473	1.48696	1	1.40723	2.23329	1.97816	2.20955	1	1	1	1.01549	1.2816	1.41665	1.9685	1	1	1.23597	1	1.04977	1	1	1	1	1	1.23427	1.10421	1	1	1	1.28332	1.44406	1	1	1	1	1.28051	1	1	1.00935
DAZARD_RESPONSE_TO_UV_SCC_DN_Down	1.11781	1	1.10799	1.92729	1.3812	1.66241	1.57169	1.06353	1	1.30294	1	1.06343	1.08473	1.56193	1.51993	1	1	1	1	1	1	1.42047	1	1	1	1	1	1	1	1.46017	1	1	1.2942	1	1	1	1	1	1	1	1.46203	1.21838	1.09573	1	1	1	1.05235
DAZARD_RESPONSE_TO_UV_SCC_DN_Up	1	1	1	1	1	1	1	1	1	1	1.69757	1	1	1	1	1	1	1	1	1.27757	1.24608	1	1	1.08498	1.4617	1	1	1.04599	1	1	1	1	1	1.61455	1	1	1.52177	1	1.21205	1	1	1	1	1.20334	1	1	1
DAZARD_RESPONSE_TO_UV_SCC_UP_Down	1.24651	1.14737	1.06489	1	1	1	1	1	1.25586	1	1.72085	1	1	1	1	1	1	1	1.09003	1	1	1	1	1	1	1	1	1	1	1	1	1	1	1	1.53866	1.01438	1	1	1	1	1.28021	1	1.07116	1	1	1	1.14021
DAZARD_RESPONSE_TO_UV_SCC_UP_Up	1	1	1	1	1	1	1.46313	1.41662	1	1.14772	1	1.65593	1.26343	2.04547	1.64962	1	1	1	1	1.40446	1.11196	1.28334	1	1	1	1	1	1.06663	1.34426	1.23566	1.12889	1	1	1	1	1	1.36886	1.35555	1	1.47478	1	1	1	1.23278	1	1.11044	1
DAZARD_UV_RESPONSE_CLUSTER_G1_Down	1.16783	1	1.28525	1	1	1	1	1	1	1	1.00592	1	1	1	1	1	1	1	1	1	1	1	1.21015	1.27724	1	1	1	1.11384	1	1	1	1	1	1	1	1	1.08937	1	1	1.66354	1	1.52388	1.28982	1	1	1	1
DAZARD_UV_RESPONSE_CLUSTER_G1_Up	1	1	1	1.3553	1.09596	1.68911	1.06522	1.02782	1	1	1	1	2.17925	2.03477	2.34827	1	1	1	1	1.03465	1	2.04448	1	1	1	1	1	1	1	1	1.31826	1.60414	1	1.23251	1.92052	1	1	1.2058	1	1	1.04775	1	1	1.26548	1	1.01088	1
DAZARD_UV_RESPONSE_CLUSTER_G2_Down	1.37978	1.06546	1.79502	1	1	1	1	1	1	1	1	1	1	1	1	1	1	1	1	1	1	1	1.3313	1	1	1	1	1	1	1	1	1	1	1	1	1	1	1	1	1	1	1	1.82259	1	1	1	1
DAZARD_UV_RESPONSE_CLUSTER_G6_Down	1	1.05823	1	1.47249	1	1.30496	1	1.86929	1.36043	2.42806	2.17146	1.72825	2.46858	2.69669	2.75198	1.01662	1	1.03226	1	1	1	2.63698	1	1	1	1.14442	1.22225	1	1	1.75777	1.09838	1	1	1	1	1	1	1.29538	1	1	1.93111	1.75913	1	1	1	1	1.37345
DAZARD_UV_RESPONSE_CLUSTER_G6_Up	1	1	1.27324	1	1	1	1	1	1	1	1	1	1	1	1	1	1	1	1	1	1	1	1	1.30976	1.03443	1	1	1	1	1	1	1.09277	1	1.06385	1.72303	1.57899	1.36821	1	1	1	1	1	1.24998	1.05831	1	1.10233	1
DE_YY1_TARGETS_DN_Down	1	1.1803	1	1.7415	1.26217	1.19097	1	1.83401	2.02907	1.96709	1.83321	1.10923	2.10573	1.68793	2.16125	1	1	1	1	1	1	1.38308	1	1	1	1	1.0177	1	1	1.60167	1	1	1.40063	1	1	1	1	1	1.13379	1	1.75843	1.5276	1	1	1	1	1.18927
DE_YY1_TARGETS_DN_Up	1	1	1.18077	1	1	1	1.29637	1	1	1	1	1	1	1	1	1	1	1.09707	1	1.13706	1	1	1	1.3168	1.03883	1	1	1.0228	1.46107	1	1.09185	1	1	1.40851	1	1.40887	1.74087	1	1	1	1	1	1.1593	1.383	1.1364	1.18591	1
DEBIASI_APOPTOSIS_BY_REOVIRUS_INFECTION_DN_Down	1	1	1	1.29077	1	1.18593	1	1.12974	1	1	1	1.24449	1.54825	1.52857	1.5842	1	1.05381	1	1.19805	1	1	1.18537	1.21346	1.09086	1	1.13138	1	1.06518	1.06399	1.2697	1	1	1	1.2151	1	1	1	1.23659	1	1.25107	1.0199	1.19196	1	1	1	1.21103	1.45488
DEBIASI_APOPTOSIS_BY_REOVIRUS_INFECTION_DN_Up	1	1.23554	1	1	1	1	1.12717	1	1	1	1	1	1	1	1	1.16994	1	1.07332	1	1.347	1	1	1	1	1.07741	1	1.21631	1	1	1	1.07922	1.00412	1.16366	1	1.27146	1.66905	1	1	1	1	1	1	1	1.22867	1	1	1
DEBIASI_APOPTOSIS_BY_REOVIRUS_INFECTION_UP_Down	1	1.12025	1	1.66914	1	1.65751	1	1.04738	1.84304	1.30233	1.82405	1	1.13727	1.07747	1.02985	1	1	1	1	1	1	1	1	1	1	1	1.60924	1	1	1	1	1	1.21362	1	1	1	1	1	1	1	2.15199	1.52542	1	1	1	1	1
DEBIASI_APOPTOSIS_BY_REOVIRUS_INFECTION_UP_Up	1	1	1	1	1	1	1	1	1	1	1	1	1	1	1	1	1	1.35699	1	1.14678	1.07024	1	1	1.10433	1	1	1	1	1.03393	1	1	1	1	1.09476	1	1	1.67844	1.04201	1	1	1	1	1	1.23224	1	1.10725	1
DELACROIX_RAR_BOUND_ES_Down	1.19806	1.11865	1.1606	1	1	1.20839	1	1	1	1	1.33933	1	1	1	1	1	1.47063	1	1.19057	1	1	1	1.11653	1.25955	1	1.05129	1.20092	1.188	1.43746	1.19704	1	1	1.33852	1	1.11803	1	1	1	1	1.09046	1.16652	1.06427	1.16428	1	1	1	1.30236
DELACROIX_RAR_BOUND_ES_Up	1	1	1	1	1.06803	1	1.17031	1.12416	1.2501	1.27997	1	1.03005	1.32866	1	1.20728	1.38965	1	1.02539	1	1.33947	1.26722	1.40222	1	1	1.1391	1	1	1	1	1	1.06368	1	1	1	1	1.15328	1.0388	1	1.35619	1	1	1	1	1	1	1	1
DELACROIX_RAR_TARGETS_DN_Down	1	1	1	1	1	1	1	1	1.09428	1	1.75695	1	1	1	1	1	1	1	1	1	1	1	1	1	1	1.43736	1	1	1	1	1	1	1	1	1	1	1	1	1	1	1.18188	1	1	1	1	1	1
DELACROIX_RAR_TARGETS_DN_Up	1	1	1	1	1	1	1	1.042	1	1	1	1	1	1	1	1	1	1	1	1	1	1.80452	1	1	1.65177	1	1	1	1	1	1	1	1	1	1	1	1	1	1	1	1	1	1	1.6432	1	1	1
DELACROIX_RAR_TARGETS_UP_Down	1.52449	1.40692	1.49753	1	1	1.25485	1	1	1.88291	1	1	1	1	1	1	1	1	1	1.3388	1	1	1	1	1.42344	1	1	1	1	1	1.10094	1	1	1	1	1.01944	1	1	1	1	1.11658	1.17202	1.32392	1.49886	1	1	1	1
DELACROIX_RAR_TARGETS_UP_Up	1	1	1	1.06788	1.42349	1	1.64603	1.588	1	1.53277	1	1.53826	1	1.1795	1	1.20426	1	1.16148	1	1.75617	1.59496	1.69319	1	1	1.08246	1	1.00539	1	1	1	1.34878	1	1.27058	1	1	1.03212	1	1.26024	1.32683	1	1	1	1	1.79283	1.29461	1.17399	1.26044
DELACROIX_RARG_BOUND_MEF_Down	1.46309	1.33909	1.68704	1	1	1.59318	1	1	1.21166	1	1.03132	1	1	1	1	1	1	1	1.26455	1	1	1	1	1.13084	1	1.01467	1	1	1	1.42967	1	1.27041	1.13147	1.19119	1.36997	1	1	1	1	1	1	1	1.68065	1	1	1.00876	1.03681
DELACROIX_RARG_BOUND_MEF_Up	1	1	1	1	1.01585	1	1.64826	1.27066	1	1.45949	1	1.04264	1	1.11847	1	1.42916	1	1.41435	1	1.72832	1.6012	1.50472	1	1	1.64362	1	1.1174	1	1.07888	1	1.59608	1	1	1	1	1	1.07552	1.17967	1.32284	1	1.10093	1.06508	1	1.84659	1.28665	1	1
DELASERNA_MYOD_TARGETS_DN_Down	1.23154	1.29474	1.0879	1	1	1.20788	1	1	1.83465	1	1.68955	1.5086	1.15898	1	1.1095	1	1	1	1.43225	1	1	1	1	1	1	1	1	1	1	1.31985	1	1	1	1	1.12903	1.06903	1	1	1	1	1.21547	1	1.09973	1	1	1	1.05781
DELASERNA_MYOD_TARGETS_DN_Up	1	1	1	1	1	1	1.87974	1.07889	1	1	1	1	1	1	1	1	1.16844	1.17953	1	1.74086	1.34736	1.16604	1.10953	1.0903	1	1	1.45807	1	1	1	1.36587	1	1.30433	1.01476	1	1	1.2638	1	1	1.4137	1	1	1	1.94312	1.62723	1.10329	1
DELASERNA_MYOD_TARGETS_UP_Down	1	1	1	1.08283	1	1.34491	1	1	1	1	1	1.01295	1	1	1	1.17665	1	1	1.39646	1	1	1	1	1	1	1.3101	1	1.2403	1.06821	1.38837	1	1.18534	1	1	1.70797	1.38802	1.19319	1	1	1	1	1	1	1	1	1.04423	1.31248
DELASERNA_MYOD_TARGETS_UP_Up	1	1.05456	1	1	1	1	1.32588	1.15119	1.33964	1.22772	1	1	1	1	1	1	1.08641	1	1	1.22187	1	1	1	1	1	1	1	1	1	1	1.18573	1	1	1	1	1	1	1.16924	1	1.36106	1	1	1	1	1	1	1
DELLA_RESPONSE_TO_TSA_AND_BUTYRATE_Up	1	1	1	1	1	1	1	1	1	1	1	1.2901	1	1.49813	1.91592	1	1	1	1	1	1	1.50429	1	1	1	1	1	1	1	1	1	1	1	1	1	1	1	1	1	1	1	1	1	1	1	1	1
DELPUECH_FOXO3_TARGETS_DN_Down	1	1	1	2.19618	1.75515	1.39039	1	1	1.04857	1.72995	2.09397	1.97726	1	1.43671	1	1	1	1	1	1.25496	1	1	1	1	1	1	1.37387	1	1	1	1	1.09928	1	1.49633	1	1	1	2.17327	1	1	1	1.04871	1	1	1	1	1
DELPUECH_FOXO3_TARGETS_DN_Up	1	1.091	1	1	1	1	1	1	1	1	1	1	1.31553	1	1	1	1.00906	1.18457	1	1	1	1	1	1	1.52007	1	1	1	1.15585	1	1	1	1.07223	1	1	1	1.2059	1	1.6028	1	1	1	1	1.65373	1.45074	1.36118	1
DELPUECH_FOXO3_TARGETS_UP_Down	1.04665	1	1.31601	1	1	1	1	1.01509	1.2018	1	1	1	1	1	1	1	1.02887	1	1.15484	1	1	1	1.00169	1	1	1	1	1	1.45044	1	1	1	1	1.0051	1.14502	1.30906	1	1	1	1	1.06434	1	1.31022	1	1	1	1.48383
DELPUECH_FOXO3_TARGETS_UP_Up	1	1.3499	1	1	1	1	1.62644	1	1	1.3044	1	1.11063	1	1	1	1.11817	1	1.06954	1	1.31462	1.18945	1	1	1.14322	1	1	1.25685	1	1	1	1	1	1.24229	1	1	1	1	1.78174	1	1	1	1	1	1.44045	1.21532	1.23456	1
DELYS_THYROID_CANCER_DN_Down	1.25004	1.40102	1	1	1	1.13628	1	1	1.55178	1	1.2417	1	1.6472	1	1.16742	1	1.27996	1	1.29029	1	1	1	1.32546	1.21605	1.36598	1.21657	1	1	1	1.28857	1	1	1.35699	1	1.97124	1	1	1	1	1	1.7867	1.2831	1	1	1	1	2.07718
DELYS_THYROID_CANCER_DN_Up	1	1	1	1.73955	1.49438	1	1.93245	1	1	1.46266	1	1.27705	1	1.32309	1	1.79275	1	1.76672	1	2.00058	1.86166	1.58306	1	1	1	1	1.35121	1	1.30524	1	2.14833	1.20296	1	1	1	1.08978	1.03163	1.36889	1.79172	1.49819	1	1	1	1.72389	1.59405	1.34972	1
DELYS_THYROID_CANCER_UP_Down	1.53962	1	1.78414	1	1	1	1	1	1.05709	1	1	1.16372	1.25012	1	1.05089	1	1	1	1.40079	1	1	1	1.08418	1.55134	1	1.44196	1	1	1	1.04261	1	1.08648	1	1.10906	1.72904	1	1	1	1	1	1.42041	1	1.78793	1	1	1	1.47188
DELYS_THYROID_CANCER_UP_Up	1	1.02969	1	1.53623	1.3639	1.35738	1.8942	1.28085	1	1.77698	1.2051	1	1	1.44262	1	1.52463	1.26671	1.8725	1	1.93514	1.84788	1.6602	1	1	1.2857	1	1.63485	1	1.34622	1	1.81125	1	1.37136	1	1	1.1442	1.18442	2.22378	1.31702	1.40482	1	1.14059	1	1.98026	1.55536	1.40673	1
DEMAGALHAES_AGING_UP_Down	1.31529	1	1.76544	1	1	1	1	1	1.03553	1	1	1	1	1	1	1	1	1	1.43915	1	1	1	1.91528	1.55419	1	1.39621	1	1.13468	1	1.1962	1	1	1	1.27808	1.79891	1	1	1	1	1.41881	1.69051	1.64424	1.75331	1	1	1	1
DEMAGALHAES_AGING_UP_Up	1	1	1	1.07802	1.38663	1	1.75867	1.37571	1	2.19247	1.42959	2.43608	1.16861	2.03162	1.55557	1.60708	1.21151	1.8825	1	1.76897	1.3813	1.90206	1	1	1.14151	1	1.06289	1	1.25666	1	1.83429	1.05762	1.66733	1	1	1.57805	1	1.76827	1.10604	1	1	1	1	1.3735	1.28202	1.76183	1
DEN_INTERACT_WITH_LCA5_Down	1	1	1	1.01487	1.74327	1	1.39816	1	1	1	1.07603	1	1	1	1	1.57401	1	1.74338	1	1	1	1	1	1	1	1	1	1	1	1	1	1	1	1	1	1	1	1	1	1	1	1	1	1	1.08755	1	1
DEN_INTERACT_WITH_LCA5_Up	1	1	1	1	1	1.22425	1	1	1	1	1	1.55418	1.13916	1.60437	1.57585	1	1	1	1	1	1	1.14811	1	1	1	1	1	1	1	1	1	1	1	1.0161	1	1	1.31499	1	1	1	1	1	1	1	1	1	1
DER_IFN_ALPHA_RESPONSE_UP_Down	1	1	1.20903	1.85497	1	1.86864	1	1	1.43907	1	1.39927	1	1	1	1	1	1	1	1.15915	1	1	1	1.11568	1.51011	1	1.26546	1.04623	1.01563	1	1	1	1.10619	1.51055	1	1.73385	1	1	1	1	1	2.49419	1.79558	1.18648	1	1	1	1
DER_IFN_ALPHA_RESPONSE_UP_Up	1	1	1	1	1	1	1.4819	1.29276	1	1	1	1	1.4075	1.50567	1.58861	1.7964	1	1.42301	1	1.88196	1.7802	1.76798	1	1	1	1	1	1	1.29728	1	1.25836	1	1	1.02524	1	1	1	1	1.04519	1	1	1	1	1.33675	1.0841	1.24003	1.25195
DER_IFN_BETA_RESPONSE_UP_Down	1	1	1	1.88129	1	1.85236	1	1.04195	1.50263	1	1.42745	1	1	1	1	1	1	1	1.28199	1	1	1	1	1.32564	1	1.09867	1.38899	1.16198	1	1	1	1	1.29068	1	1.3448	1	1	1	1	1	2.42675	1.92058	1	1	1	1	1
DER_IFN_BETA_RESPONSE_UP_Up	1	1	1	1	1	1	1.20889	1	1	1	1	1	1	1	1	1.71659	1	1.46829	1	1.80259	1.50584	1.2126	1	1	1	1	1	1	1.16223	1	1.03569	1	1	1	1	1	1.11956	1.07459	1	1	1	1	1	1.29033	1.09439	1.19776	1
DER_IFN_GAMMA_RESPONSE_UP_Down	1	1	1.17594	1.67741	1	1.89119	1	1	1.47287	1	1.42253	1	1	1	1	1	1	1	1	1	1	1	1.20246	1.44617	1.01344	1.22885	1.01235	1.15532	1	1	1	1.26128	1.51243	1	1.66469	1	1	1	1	1	2.40042	2.0275	1.1513	1	1	1	1
DER_IFN_GAMMA_RESPONSE_UP_Up	1	1	1	1	1	1	1.48644	1.4758	1	1.04117	1	1	1.29137	1.52105	1.56109	1.77723	1	1.51212	1	1.86102	1.899	1.81282	1	1	1	1	1	1	1.10027	1.20911	1.16997	1	1	1.16498	1	1	1	1	1	1	1	1	1	1.29568	1.10169	1.07008	1.27544
DEURIG_T_CELL_PROLYMPHOCYTIC_LEUKEMIA_DN_Down	1.48256	1.61138	1	1	1	1.04346	1	1.81868	1.68758	1.32606	1.37229	1	1.81722	1.12364	1.55955	1	1	1	1	1	1	1.19966	1	1	1.2128	1	1.02711	1.03412	1	1.06105	1	1	1	1	1	1	1	1	1	1	1.83639	1.54502	1	1	1	1	1.06487
DEURIG_T_CELL_PROLYMPHOCYTIC_LEUKEMIA_DN_Up	1	1	1	1	1	1	1	1	1	1	1	1	1	1	1	1.14963	1	1.0245	1	1.00913	1	1	1	1	1	1	1	1	1	1	1.06757	1.11261	1	1	1.39668	1.3292	1.2318	1.25099	1.1439	1	1	1	1	1	1	1	1
DEURIG_T_CELL_PROLYMPHOCYTIC_LEUKEMIA_UP_Down	1.10616	1	1.17145	1.06416	1	1.20345	1	1	1	1	1.10414	1.20272	1	1	1.069	1	1	1	1.34358	1	1	1	1	1.02783	1	1.16484	1	1	1	1.10605	1	1	1	1	1	1	1	1.60781	1	1.11262	1.00391	1	1.18897	1	1	1	1.18284
DEURIG_T_CELL_PROLYMPHOCYTIC_LEUKEMIA_UP_Up	1	1	1	1	1.04564	1	1.2615	1.09423	1.1166	1	1	1	1	1	1	1.2662	1	1.22924	1	1.28994	1.01294	1	1	1	1.18506	1	1	1	1	1	1	1.27304	1.40074	1	1	1	1.17759	1	1.02938	1	1	1	1	1.45444	1.05407	1.00996	1
DIAZ_CHRONIC_MEYLOGENOUS_LEUKEMIA_DN_Down	1.39831	1	1.44896	1	1	1	1	1	1	1	1	1	1	1	1	1	1	1	1.01676	1	1	1	1.03801	1	1.20136	1.86867	1	1.56771	1	1	1.28449	1.25921	1	1.43352	1	1.35269	1	1	1	1.68405	1.63313	1.65377	1.44693	1	1	1	1.74716
DIAZ_CHRONIC_MEYLOGENOUS_LEUKEMIA_DN_Up	1	1	1	1.38164	1.50393	1.73172	1.41325	1.30013	1	1.50201	1	1.04217	1.55198	1.13737	1.4112	1.23094	1.24182	1.60925	1	1.54482	1.47137	1.60139	1	1	1	1	1.37338	1	1	1	1	1	1.17967	1	1.15559	1	1.41386	1.44216	1.24936	1	1	1	1	1.54053	1.12668	1.31253	1
DIAZ_CHRONIC_MEYLOGENOUS_LEUKEMIA_UP_Down	1	1	1	1.47677	1	1	1	1	1.14226	1	1.51998	1	1	1	1	1	1	1	1	1	1	1	1	1	1	1	1	1	1	1	1	1	1	1	1	1	1	1.10768	1	1	1	1	1	1	1	1	1
DIAZ_CHRONIC_MEYLOGENOUS_LEUKEMIA_UP_Up	1	1	1	1	1	1	1	1.25501	1	1	1	1	1.37049	1.29237	1.40098	1	1	1	1	1	1	1.19493	1	1	1	1	1	1	1.11735	1	1	1	1	1	1	1	1.15198	1	1	1.02542	1	1	1	1	1	1	1
DING_LUNG_CANCER_EXPRESSION_BY_COPY_NUMBER_Down	1	1.40935	1	1.72333	1.61742	1	1	1.05378	1	1.07307	1.28536	1	1	1.01669	1	1	1	1	1	1	1	1	1	1	1	1	1.27826	1	1	1	1	1	1.12432	1	1	1	1	1	1	1	1	1	1	1.18661	1	1	1
DING_LUNG_CANCER_EXPRESSION_BY_COPY_NUMBER_Up	1	1	1	1	1	1	1	1	1	1	1	1	1	1	1	1	1	1	1	1	1	1	1.04713	1.58569	1	1	1	1	1.0178	1	1	1	1	1.24661	1.05115	1	1.51619	1	1	1.08589	1	1	1	1	1	1	1
DING_LUNG_CANCER_MUTATED_SIGNIFICANTLY_Down	1	1	1	1	1	1	1	1.86652	1.83357	1.63972	1	1.62285	1.81547	1.81613	1.81209	1.35828	1	1	1	1	1	1.67643	1.06538	1	1	1	1	1	1	1	1	1	1.21642	1	1	1	1	1	1	1	1.3639	1.14548	1	1	1	1	1
DING_LUNG_CANCER_MUTATED_SIGNIFICANTLY_Up	1	1	1	1	1	1	1.36047	1	1	1	1	1	1	1	1	1	1.77364	1.02653	1	1	1	1	1	1.32258	1	1.14657	1	1	1	1	1	1	1	1	1	1.52145	1	1	1	1	1	1	1	1.20422	1.07302	1	1
DIRMEIER_LMP1_RESPONSE_EARLY_Down	1.64949	1.34308	1.68642	1	1	1	1	1	1	1	1	1	1	1.29078	1	1	1.24173	1	1	1	1	1	1	1	1	1	1	1	1.93221	1	1.27191	1.16461	1	1.49782	1.32246	1.02469	1	1	1	1.33321	1.38083	1.02821	1.6866	1	1	1	1
DIRMEIER_LMP1_RESPONSE_EARLY_Up	1	1	1	1.91342	1.48064	1	1.37895	1.71436	1.04473	1.44856	1.3474	1.02604	1.46834	1	1.03526	1.2809	1	1.14252	1	1.17439	1	1	1.26534	1.09619	1.1084	1.37268	1.65307	1.14906	1	1	1	1	1.35704	1	1	1	1	1.39445	1.89707	1	1	1	1	1.55907	1.1745	1	1.17385
DIRMEIER_LMP1_RESPONSE_LATE_DN_Down	1	1	1	1	1	1	1	1	1	1	1	1	1	1	1	1	1.0813	1	1	1	1	1	1	1	1	1	1	1	1	1	1	1	1	1	1	1	1	1	1	1	1.12786	1	1	1	1	1	1
DIRMEIER_LMP1_RESPONSE_LATE_DN_Up	1	1	1	1	1.21898	1	1.21927	1	1.03011	1.51888	1	1	2.0785	1.93409	2.22725	1.56517	1	1.12422	1.14328	1.59789	1.78037	2.32909	1	1	1	1	1.03866	1	1	1	1.49587	1	1	1	1	1	1	1	1.25548	1	1	1	1	1	1	1	1
DIRMEIER_LMP1_RESPONSE_LATE_UP_Down	1	1	1.00448	1	1	1	1	1	1	1	1.12726	1	1	1	1	1	1	1	1.47796	1	1	1	1.146	1.01595	1	1.1	1.07152	1.01999	1	1.21718	1	1	1	1.583	1	1	1.33511	1	1	1.45063	1	1.3148	1.02622	1	1	1	1
DIRMEIER_LMP1_RESPONSE_LATE_UP_Up	1	1.31687	1	1	1.06206	1	1.1747	1	1	1	1	1	1	1	1	1.23011	1	1.22292	1	1.30326	1	1	1	1	1	1	1	1	1	1	1	1	1.23718	1	1	1.09871	1	1	1	1	1	1	1	1.62251	1.33406	1.07043	1.21322
DITTMER_PTHLH_TARGETS_DN_Down	1	1	1	1	1	1	1	1.05749	1	1	1	1	1	1	1	1	1.11047	1	1	1	1	1	1	1	1	1	1	1	1	1	1.00309	1	1	1.03037	1	1	1	1	1	1	1.15992	1	1	1	1	1	1
DITTMER_PTHLH_TARGETS_DN_Up	1	1	1	1	1	1.08252	1.14907	1	1	1.03734	1	1.21243	1.24335	1	1	1.09675	1	1	1	1	1	1	1	1	1	1	1	1	1	1	1	1	1	1	1.20678	1	1	1	1	1	1	1	1	1.12795	1	1.08114	1
DITTMER_PTHLH_TARGETS_UP_Down	1	1	1	1.15763	1.07488	1	1	1	1.37951	1	1.43145	1	1	1	1	1	1	1	1	1	1	1	1	1	1	1	1	1	1	1	1	1	1	1	1	1	1	1	1	1	1	1	1	1	1	1	1
DITTMER_PTHLH_TARGETS_UP_Up	1	1	1	1	1	1	1.45144	1.00558	1	1	1	1.04145	1.47253	1.27145	1.34024	1	1	1	1	1.36293	1.03156	1.30477	1	1	1.75059	1	1	1	1.00661	1	1.14182	1	1	1	1	1	1.36228	1	1	1	1	1	1	1.15427	1	1	1
DOANE_BREAST_CANCER_CLASSES_DN_Down	1	1	1	1	1	1	1	1	1	1	1	1	1	1	1	1	1	1	1	1	1	1	1	1.36616	1	1.05432	1	1	1.04732	1.0325	1	1	1.3571	1.18484	1	1	1	1	1	1.08651	1.25397	1.11784	1	1	1	1	1.18878
DOANE_BREAST_CANCER_CLASSES_DN_Up	1	1	1	1	1.16386	1	1.42246	1.26649	1	1	1	1.08247	1	1	1	1.24213	1	1.47888	1	1.41748	1.4619	1.51366	1	1	1	1	1.3824	1	1	1	1.50475	1	1	1	1	1.50265	1.61317	1	1	1	1	1	1	1.47351	1.14344	1.25944	1
DOANE_BREAST_CANCER_CLASSES_UP_Down	1	1	1	1	1	1	1	1	1.7026	1	1.60126	1	1	1	1	1	1.33508	1	1.46699	1	1.0402	1	1.51165	1.6371	1	1	1	1.60474	1.2925	1.19336	1	1.46241	1	1	1.5699	1.41433	1	1	1	1	1	1	1	1	1.38202	1	1.62357
DOANE_BREAST_CANCER_CLASSES_UP_Up	1.10026	1	1	1.62492	1.47307	1	1.48915	1.20728	1	1.26805	1	1	1.01471	1	1	1.21732	1	1	1	1.45623	1	1	1	1	1	1	1.4737	1	1	1	1	1	1	1	1	1	1	1.06972	1.20444	1.30245	1	1.06322	1	1	1	1	1
DOANE_BREAST_CANCER_ESR1_DN_Down	1	1	1	1	1	1	1	1	1	1	1.20479	1.45681	1	1	1	1	1	1	1.38875	1	1.30897	1	1	1	1	1.1387	1	1	1	1.08333	1	1	1	1	1	1	1.02802	1	1	1	1	1	1	1	1	1	1.13995
DOANE_BREAST_CANCER_ESR1_DN_Up	1.59684	1.37705	1.32298	1	1.21674	1	1.71269	1.07987	1.03398	1.27513	1	1	1	1.29643	1.59947	1.63594	1	1.86421	1	1.25635	1	1.66657	1.07663	1	1	1	1.56783	1.30809	1.29667	1	1	1.1031	1.25381	1	1.27032	1.66748	1	1	1	1	1	1	1.32067	1	1	1.36001	1
DOANE_BREAST_CANCER_ESR1_UP_Down	1	1	1.04302	1	1	1	1	1.55474	1	1	1.37782	1	1	1	1	1	1	1	1.3967	1	1.37994	1	1.29294	1.00047	1.13763	1.19098	1	1	1	1.30429	1	1.33763	1.17682	1	1.18411	1	1	1	1	1	1.29168	1	1.03306	1	1	1	1.13381
DOANE_BREAST_CANCER_ESR1_UP_Up	1	1	1	1.29275	1.22207	1.25752	1.20542	1	1	1.10303	1	1	1.18892	1.40757	1	1	1.11553	1.37572	1	1.30058	1	1	1	1	1	1	1.2838	1	1.12239	1	1	1	1	1	1	1	1.6851	1.0218	1.43136	1.25952	1	1	1	1.21874	1.01556	1.28076	1
DOANE_RESPONSE_TO_ANDROGEN_DN_Down	1.13768	1	1.3354	1.36134	1	1.17278	1	1	1	1	1.38931	1.14904	1	1.11321	1.03007	1.10382	1	1	1	1	1	1	1	1	1	1	1	1	1	1.37458	1	1.26126	1	1.08127	1.04531	1	1.42467	1	1	1	1	1	1.34084	1	1	1	1.82089
DOANE_RESPONSE_TO_ANDROGEN_DN_Up	1	1	1	1	1	1	1.48315	1	1	1	1	1	1	1	1	1	1.07229	1.31395	1	1.4627	1.53621	1.03886	1	1	1.16469	1	1	1.87276	1.71786	1	1.33021	1	1	1	1	1.03336	1	1	1.11922	1.19371	1	1.18171	1	1.618	1.28023	1	1
DOANE_RESPONSE_TO_ANDROGEN_UP_Down	1	1	1.43073	1	1	1	1	1	1	1	1	1	1.10134	1	1.01244	1	1	1	1.13422	1	1.00261	1.00835	1.10333	1.2149	1	1	1	1.06825	1	1.17296	1	1	1	1.0698	1	1	1	1	1	1	1	1	1.42951	1	1	1	1.2172
DOANE_RESPONSE_TO_ANDROGEN_UP_Up	1	1.15396	1	1	1.05579	1	1.09942	1	1.38546	1.27459	1.13636	1	1	1	1	1	1.17141	1	1	1	1	1	1	1	1	1	1.35038	1	1	1	1	1	1	1	1.03542	1	1.10404	1	1.14913	1.06765	1	1.09414	1	1.22526	1.17747	1	1
DODD_NASOPHARYNGEAL_CARCINOMA_DN_Down	1	1	1	1.83917	1	1.37267	1	1	1.45436	1.91555	2.06526	1.60993	1	1.15743	1	1	1	1	1	1	1	1	1	1	1	1.16967	1.51184	1	1	1	1	1	1	1	1	1.00089	1	1.7811	1.70935	1	1.11946	1	1	1	1	1	1
DODD_NASOPHARYNGEAL_CARCINOMA_DN_Up	1	1	1.35195	1	1	1	1	1	1	1	1	1	1.04549	1	1	1	1	1	1	1	1.06893	1	1	1.17119	1.56375	1	1	1	1.35987	1	1	1	1	1.11867	1	1	1.02119	1	1	1	1	1	1.37469	1.00528	1	1.11974	1
DODD_NASOPHARYNGEAL_CARCINOMA_UP_Down	1.03142	1	1.21047	1	1	1.11241	1	1.32653	1	1	1	1	1	1	1	1.17138	1	1	1.79905	1	1.88203	1.13197	1.33253	1.60869	1.11317	1.10445	1	1.17092	1	1.4118	1	1.11225	1	1.19093	1.14289	1.12239	1	1	1	1.19929	1.10213	1	1.21327	1	1	1	1.12279
DODD_NASOPHARYNGEAL_CARCINOMA_UP_Up	1	1.25848	1	1.45409	1.39126	1	1.28369	1	1.23812	1.72394	1.87135	1.16661	1	1.28859	1	1	1.42115	1.45719	1	1.18886	1	1	1	1	1	1	1.60335	1	1.32931	1	1.24482	1	1.1993	1	1	1	1.11148	1.86349	1.6347	1	1	1.1524	1	1.13322	1.2597	1.30496	1
DORN_ADENOVIRUS_INFECTION_12HR_DN_Down	1.41658	1	1.34478	1	1	1	1	1.04734	1.97742	1.56518	1.57016	1.34043	1	1	1	1	1	1	1.35602	1	1	1	1	1	1	1	1.10011	1	1	1	1	1	1	1	1.68046	1.07386	1	1	1.23119	1.10161	1	1.27283	1.35988	1	1	1	1
DORN_ADENOVIRUS_INFECTION_12HR_DN_Up	1	1	1	1	1	1	1.41165	1	1	1	1	1	1	1	1	1.05529	1	1.0658	1	1.22161	1	1	1	1	1.05015	1	1	1	1.27112	1.03192	1	1	1.35947	1	1	1	1.09307	1	1	1	1	1	1	1.47061	1	1.30147	1.00177
DORN_ADENOVIRUS_INFECTION_12HR_UP_Down	1	1.03118	1.27177	1	1	1	1	1	1.41895	1.18913	1.12276	1.06927	1.06669	1.5665	1.34335	1.29739	1	1.10062	1	1	1	1.17492	1.57331	1	1	1	1.26261	1.81606	1.61787	1	1	1	1	1	1.42113	1	1	1	1	1	1.74265	1.76439	1.29775	1	1	1	1
DORN_ADENOVIRUS_INFECTION_12HR_UP_Up	1	1	1	1	1	1	1.29633	1.0605	1	1	1	1	1	1	1	1	1.07671	1	1	1	1	1	1	1	1	1	1	1	1	1	1	1	1	1	1	1	1	1	1	1	1	1	1	1.54467	1.16877	1	1
DORN_ADENOVIRUS_INFECTION_24HR_DN_Down	1.52964	1.07856	1.59273	1	1	1	1	1	1.8291	1.54107	1.40732	1.38184	1	1.22453	1.072	1.02539	1	1.07441	1.11498	1	1	1	1.0776	1	1	1	1.40327	1.14969	1	1	1	1.00885	1	1	1.81804	1.28686	1.12013	1	1	1.01633	1.54699	1.57679	1.57996	1	1	1	1
DORN_ADENOVIRUS_INFECTION_24HR_DN_Up	1	1	1	1.03687	1.10526	1	1.27081	1	1	1	1	1	1	1	1	1	1	1	1	1.11708	1	1	1	1	1	1	1	1	1	1.19906	1.13533	1	1.51015	1	1	1	1	1.16746	1.07935	1	1	1	1	1.64006	1.0838	1	1.1618
DORN_ADENOVIRUS_INFECTION_32HR_DN_Down	1.4526	1	1.46873	1	1	1	1	1	2.0126	1.54725	1.25245	1.12744	1	1.13132	1.02263	1	1	1.21667	1.07332	1	1	1	1.08138	1	1	1	1.45005	1	1	1	1	1.03039	1	1	2.05034	1.24424	1.03064	1	1	1.03229	1.33272	1.34778	1.45205	1	1	1	1
DORN_ADENOVIRUS_INFECTION_32HR_DN_Up	1	1	1	1.16478	1.19893	1	1.44066	1.08111	1	1	1	1	1	1	1	1	1	1	1	1.12434	1	1	1	1	1	1	1	1	1	1.15096	1	1	1.23337	1.03943	1	1	1	1.2925	1	1	1	1	1	1.52246	1	1	1.33598
DORN_ADENOVIRUS_INFECTION_48HR_DN_Down	1.55681	1.05615	1.51266	1	1	1.04502	1	1	1.97362	1.48516	1.33723	1.13175	1	1.27506	1	1	1.01728	1.16577	1.10412	1	1	1.02772	1.09229	1	1	1	1.36967	1	1	1	1	1.15895	1	1	2.07746	1.28757	1.08379	1	1	1	1.24054	1.26904	1.53291	1	1	1	1
DORN_ADENOVIRUS_INFECTION_48HR_DN_Up	1	1	1	1.18688	1.20171	1	1.53048	1.11685	1	1	1	1	1	1	1	1	1	1	1	1.00578	1	1	1	1	1.05603	1	1	1	1	1.1868	1	1	1.31143	1.06759	1	1	1	1.32508	1	1	1	1	1	1.55801	1	1	1.31345
DORSAM_HOXA9_TARGETS_DN_Down	1.36382	1	1.43286	1	1	1.73563	1	1	1.29175	1	1.03556	1	1	1	1	1	1	1	1.53492	1	1	1	1.14949	1.31052	1	1	1	1	1	1	1	1	1	1	1.20198	1	1	1	1.12442	1	1.47489	1	1.45912	1	1	1	1.30456
DORSAM_HOXA9_TARGETS_DN_Up	1	1	1	1	1.34088	1	1.59855	1.33499	1	1	1	1	1	1.09386	1.1304	1	1	1	1	1.396	1	1.14433	1	1	1.65661	1	1	1	1.33309	1.08892	1.02449	1.00357	1	1	1	1	1	1.25924	1	1.18769	1	1	1	1.72353	1.55286	1.0835	1
DORSAM_HOXA9_TARGETS_UP_Down	1	1	1	1.25974	1	1	1	1	1	1	1.21396	1	1	1	1	1	1.33269	1.13689	1	1	1	1	1	1	1	1	1	1	1	1	1	1	1	1	1	1	1	1.31387	1	1	1	1	1	1	1	1	1
DORSAM_HOXA9_TARGETS_UP_Up	1.08031	1.20334	1	1	1	1	1	1	1	1	1	1.21311	1	1	1	1.04031	1	1	1	1	1	1	1.08061	1.37828	1	1	1	1	1	1	1	1	1	1	1	1	1.03299	1	1.19444	1	1	1	1	1.12012	1	1	1
DORSEY_GAB2_TARGETS_Up	1	1	1	1	1	1	1	1	1	1	1	1	1	1	1	1	1	1	1	1	1	1	1	1	1	1	1	1	1	1	1	1	1	1	1	1	1	1	1	1	1	1	1	1.65303	1	1	1
DOUGLAS_BMI1_TARGETS_DN_Down	1	1	1	1.2853	1	1.10445	1	1	1.30692	1	1	1	1.599	1	1.26444	1	1	1	1	1	1	1	1	1	1	1	1	1	1	1	1	1	1	1	1	1.12199	1	1	1	1	1.38428	1.03437	1	1	1	1	1
DOUGLAS_BMI1_TARGETS_DN_Up	1	1	1.00936	1	1	1	1.31172	1	1	1	1	1	1	1	1	1	1	1.26559	1	1.37181	1.2401	1	1	1.04452	1	1	1	1	1.01406	1	1.25129	1	1.03976	1	1	1	1.11956	1.20594	1.22543	1	1	1	1.00871	1.25656	1.0815	1.1873	1.09414
DOUGLAS_BMI1_TARGETS_UP_Down	1	1	1	1.12786	1	1.2289	1	1	1	1	1.02337	1.31854	1	1	1	1	1	1	1	1	1	1	1	1	1	1	1	1	1.10574	1.16098	1	1.06824	1	1	1.2561	1	1	1.03849	1	1	1	1	1	1	1	1	1.30256
DOUGLAS_BMI1_TARGETS_UP_Up	1.01318	1.08182	1	1	1	1	1.35442	1	1	1	1	1	1	1	1	1.04224	1	1.1582	1	1.39658	1.49812	1.00575	1	1	1.20288	1	1.06191	1	1	1	1.1685	1	1	1	1	1.08887	1	1	1	1	1	1.21099	1	1.1916	1.06028	1	1
DUAN_PRDM5_TARGETS_Down	1.09999	1	1.30562	1	1	1.20518	1	1	1.18001	1.11331	1.03134	1.16971	1.50961	1.49209	1.66522	1.04363	1	1	1	1	1	1.04599	1.01443	1	1	1.4069	1	1	1.07287	1.4038	1	1.25111	1	1.46553	1	1	1	1	1	1	1.61793	1	1.2927	1	1	1	1
DUAN_PRDM5_TARGETS_Up	1	1	1	1.24669	1.35919	1	1.65581	1	1	1	1	1	1	1	1	1	1.35796	1.13568	1.06374	1.3581	1.39051	1	1	1.27495	1	1	1	1	1	1	1.36614	1	1	1	1	1.12431	1	1	1	1.78372	1	1.26182	1	1.631	1.51058	1.2484	1
DUNNE_TARGETS_OF_AML1_MTG8_FUSION_UP_Down	1	1	1	1	1	1	1	1.03014	1.16821	1.334	1	1.49903	1	1	1	1.14648	1	1	1	1	1	1	1.56033	1.19758	1	1.17586	1	1	1	1	1.34854	1	1	1.36364	1	1	1	1	1	1.18994	1.24968	1	1	1	1	1	1
DUNNE_TARGETS_OF_AML1_MTG8_FUSION_UP_Up	1	1	1	1	1.19695	1	1.17412	1	1	1	1	1	1	1.01	1	1	1.26581	1	1	1	1	1	1	1	1	1	1	1	1	1	1	1	1	1	1	1	1	1	1.02154	1	1	1	1	1	1.0442	1.18693	1
DURAND_STROMA_NS_UP_Down	1.44997	1.27844	1.32856	1	1	1.1705	1	1.00133	1.14159	1	1	1	1.24724	1	1.06105	1.01793	1	1	1.35254	1	1	1	1.58602	1	1.13486	1.06347	1	1.01491	1	1.15333	1	1	1	1	1	1	1	1	1.5428	1.02968	1.679	1.13145	1.33831	1	1	1	1.35929
DURAND_STROMA_NS_UP_Up	1	1	1	1	1.12858	1	1.52642	1	1	1.32064	1	1	1	1	1	1	1.15808	1.21765	1	1.5239	1.2358	1	1	1	1	1	1	1	1	1	1	1.54723	1	1.409	1	1.09871	1.38514	1.63114	1	1	1	1	1	1.53262	1.53452	1.48587	1
DURAND_STROMA_S_UP_Down	1.31591	1.3054	1.34818	1	1	1.71574	1	1	1.62717	1	1.39111	1.49434	1.52363	1	1	1	1	1	1.3903	1	1	1	1.17106	1.6944	1.30673	1.30694	1	1.29436	1	1.44415	1	1.17286	1.12471	1.41267	1.51808	1	1	1	1	1	1.59486	1	1.35448	1	1	1	1.60045
DURAND_STROMA_S_UP_Up	1	1	1	1.06967	1.29076	1	1.92156	1	1	1.13896	1	1	1	1.32455	1	1.41874	1.40105	1.83627	1	1.93424	1.67832	1.72646	1	1	1	1	1.40802	1	1.34982	1	1.83512	1	1	1	1	1.15985	1.50637	1.90086	1.39465	1.78972	1	1.1603	1	1.86198	1.53515	1.07181	1
DURCHDEWALD_SKIN_CARCINOGENESIS_DN_Down	1.04655	1.05806	1	1.17379	1	1.13211	1	1.57058	1.24555	1.016	1	1	2.42988	1.79597	2.25491	1	1	1	1	1	1	1.75588	1.00375	1	1	1	1	1	1	1.74865	1	1.00535	1	1.12678	1	1	1	1	1	1	1.73373	1.38244	1	1	1	1	1.11126
DURCHDEWALD_SKIN_CARCINOGENESIS_DN_Up	1	1	1	1	1	1	1.23713	1	1	1	1	1	1	1	1	1.02576	1	1.13701	1	1.35624	1.24055	1	1	1	1	1	1	1	1	1	1	1	1	1	1	1.1763	1.1322	1.67795	1	1	1	1	1	1.39053	1.01974	1.00598	1
DURCHDEWALD_SKIN_CARCINOGENESIS_UP_Down	1.33385	1.40223	1	1	1	1.42068	1	1	1	1	1	1	1	1	1	1	1	1	1.31779	1.14257	1.26828	1	1.37988	1.11885	1	1	1	1.12536	1	1	1.24659	1	1	1	1.12539	1.0581	1	1.64888	1	1	1	1	1	1	1	1.12215	1
DURCHDEWALD_SKIN_CARCINOGENESIS_UP_Up	1	1	1	1	1.02728	1	1.28197	1.03377	1	1.31681	1.16266	1.17952	1.65256	1.82021	1.65497	1	1	1.21358	1	1	1	1.46068	1	1	1	1	1.28739	1	1.07397	1	1	1	1.16926	1.37889	1	1	1	1	1.39661	1	1.87352	1.5095	1	1.20641	1.31121	1	1.005
DUTERTRE_ESTRADIOL_RESPONSE_24HR_DN_Down	1.31432	1.36248	1.24608	1	1	1.35355	1	1.4075	1.53746	1.14716	1.53273	1.13492	2.18824	1.81219	2.1137	1	1	1	1.16096	1	1	1.55538	1	1	1	1.00964	1	1	1	1.26049	1	1	1.21141	1	1.35918	1	1	1	1	1	2.06977	1.41501	1.2499	1	1	1	1.55096
DUTERTRE_ESTRADIOL_RESPONSE_24HR_DN_Up	1	1	1	1	1	1	1.61996	1	1	1	1	1	1	1	1	1	1.15314	1.33356	1	1.54161	1.31801	1	1	1	1	1	1	1	1	1	1.31005	1	1	1.16885	1	1	1.1714	2.22426	1.30259	1.2607	1	1	1	1.54712	1.26079	1.28488	1
DUTERTRE_ESTRADIOL_RESPONSE_24HR_UP_Down	1	1	1	2.39347	1	2.33659	1	1	1	2.17845	1.82682	2.23784	1	1.4601	1	1	1	1	1.0794	1	1.20555	1	1	1	1	1	1	1	1	1	1	1.0997	1	1	1.20299	1.49205	1	2.69543	1.66813	1	1	1	1	1	1	1	1
DUTERTRE_ESTRADIOL_RESPONSE_24HR_UP_Up	1.58624	1.42258	1.69679	1	1	1	1	1.08558	1.4349	1	1	1	1.33376	1	1	1	1.17603	1.22765	1	1	1	1	1.02758	1.07649	2.71231	1.00197	1.13857	1.50316	1.66642	1.29874	1	1	1.51372	1.07748	1	1	1.24256	1	1	1	1	1	1.69497	1	1	1.41785	1
DUTERTRE_ESTRADIOL_RESPONSE_6HR_DN_Down	1.32327	1.66984	1	1	1	1.60874	1	1	1	1	1.55313	1	2.22148	1.83346	2.06257	1.09692	1	1	1	1	1	1.65993	1	1.24413	1.10397	1	1	1	1	1.11274	1	1	1	1	1.01689	1	1	1	1	1	1.90877	1.59384	1	1	1	1	1.75239
DUTERTRE_ESTRADIOL_RESPONSE_6HR_DN_Up	1	1	1	1.0703	1.22977	1	1.72109	1	1	1	1	1	1	1	1	1	1.25388	1.19857	1	1.55133	1.20215	1	1.07645	1	1	1	1	1	1	1	1.37275	1	1	1.30634	1	1.00039	1	1.4275	1.19555	1.03057	1	1	1	1.44174	1.32525	1.35551	1
DUTERTRE_ESTRADIOL_RESPONSE_6HR_UP_Down	1	1	1	1.38938	1	1.58137	1	1	1	1	1	1.0153	1.29397	1.00053	1.13802	1	1	1	1.03982	1	1	1	1.11743	1	1	1.00283	1	1	1	1	1	1	1	1	1.13865	1.30655	1	1.61456	1.04818	1	1	1	1	1	1	1	1.27387
DUTERTRE_ESTRADIOL_RESPONSE_6HR_UP_Up	1.19127	1.35691	1	1	1	1	1.42056	1	1.0266	1	1	1	1	1	1	1	1.29037	1.3314	1	1.46035	1.2382	1	1	1	1.86525	1	1.32899	1	1.25986	1.20848	1.33888	1.11752	1.20485	1	1	1	1.07413	1	1	1.23566	1	1	1	1.36786	1.2086	1.355	1
DUTTA_APOPTOSIS_VIA_NFKB_Down	1	1	1.1839	1	1	1	1	1	1	1	1.02836	1	1.08465	1	1.32052	1	1	1	1.04377	1	1	1.29564	1	1	1	1	1.02085	1	1	1	1	1	1	1	1	1	1	1	1	1.37293	1.10454	1	1.19932	1	1	1	1
DUTTA_APOPTOSIS_VIA_NFKB_Up	1	1	1	1	1.11477	1	1.15939	1	1	1	1	1.30464	1	1	1	1	1	1.15342	1	1.36234	1	1	1	1.21457	1.04696	1	1	1	1	1	1	1	1	1	1	1	1	1.6945	1	1	1	1	1	1.15921	1	1.03407	1.41183
EBAUER_MYOGENIC_TARGETS_OF_PAX3_FOXO1_FUSION_Down	1	1	1.18885	1	1	1.02841	1	1	1	1	1.2043	1	1.63429	1	1.36241	1	1.20477	1	1	1	1	1	1.43491	1	1	1	1.11443	1	1	1.23262	1	1.7533	1.11896	1.271	1.77802	1.42956	1.03513	1	1	1	1	1	1.18841	1	1	1	1.02446
EBAUER_MYOGENIC_TARGETS_OF_PAX3_FOXO1_FUSION_Up	1	1.13939	1	1.13004	1.59785	1	1.55548	1	1.73609	1.10977	1	1.19899	1	1	1	1.20445	1	1.01172	1.45836	1.55658	1.75176	1.43762	1	1.81758	1	1	1	1.19071	1.06744	1	1.38408	1	1	1	1	1	1	1	1	1	1	1.31131	1	1.49306	1.36211	1	1
EBAUER_TARGETS_OF_PAX3_FOXO1_FUSION_DN_Down	1.13128	1.31162	1.12101	1.0379	1	1	1	1	1.04458	1	1.6112	1.16312	1	1	1	1	1.29882	1.04557	1.63774	1	1.09587	1	1	1	1.18429	1.37029	1.10333	1.22874	1	1.6185	1	1.44856	1	1.42185	1.10348	1	1.26784	1	1.36759	1	1.72831	1	1.126	1.05028	1.18923	1.48502	1.09541
EBAUER_TARGETS_OF_PAX3_FOXO1_FUSION_DN_Up	1	1	1	1	1.09766	1	1.32749	1.1793	1	1	1	1	2.05839	1.27797	1.74177	1.02221	1	1	1	1.27057	1	1.14272	1	1	1	1	1	1	1	1	1	1	1.41688	1	1	1	1	1.24484	1	1.40887	1	1	1	1	1	1	1
EBAUER_TARGETS_OF_PAX3_FOXO1_FUSION_UP_Down	1	1	1.29023	1	1	1.12702	1	1.32823	1	1	1	1	1.18858	1	1	1.13391	1.07561	1	1.05352	1	1	1	1.44914	1	1	1	1	1	1	1.28726	1	1.32971	1	1.34898	1.6474	1.28019	1.26649	1	1	1	1.04508	1	1.28683	1	1	1	1.31062
EBAUER_TARGETS_OF_PAX3_FOXO1_FUSION_UP_Up	1	1	1	1.17365	1.42728	1	1.56706	1	1.03592	1.09322	1	1	1	1	1	1	1	1.01821	1	1.56973	1.49901	1.28568	1	1	1	1.03832	1.16372	1	1	1	1.63704	1	1.17208	1	1	1	1	1.21842	1.18356	1.52323	1	1.51879	1	1.60133	1.54941	1.14281	1
EGUCHI_CELL_CYCLE_RB1_TARGETS_Down	1	1	1	2.59753	2.42878	1.95495	1	1	1	2.29437	2.19993	1	1	1.71713	1	1	1	1	1	1	1	1	1	1	1	1.45651	1.11309	1	1	1	1	1	1	1	1	1	1	1.87971	1.98792	1	1.62539	1.03531	1	1.15507	1	1	1
EGUCHI_CELL_CYCLE_RB1_TARGETS_Up	2.05909	1.55739	1.96354	1	1	1	1	1.2577	1	1	1	1	1.56584	1	1	1	1	1	1	1	1	1.17145	1.18928	1.42369	2.24099	1	1	1.85026	1	1	1	1	1	1	1	1	1	1	1	1	1	1	1.94736	1	1	1.6217	1
EHLERS_ANEUPLOIDY_UP_Down	1.71261	1.5592	1.47139	1	1	1	1	1.18889	1.21578	1	1.05468	1	1	1	1	1	1	1	1	1	1	1	1	1	1	1	1	1	1	1	1.06581	1	1.07772	1	1	1	1	1	1	1	1	1	1.48481	1	1	1	1.17403
EHLERS_ANEUPLOIDY_UP_Up	1	1	1	1	1	1	1	1	1	1	1	1	1	1.08183	1	1	1	1	1	1.20969	1	1	1	1	1	1	1	1	1	1	1	1	1	1.02329	1	1	1	1.18735	1.20623	1.2839	1	1.02982	1	1	1	1	1
ELLWOOD_MYC_TARGETS_DN_Down	1	1	1	1.30939	1.24824	1	1	1	1	1	1	1	1	1	1	1	1	1	1.14959	1	1	1	1	1	1	1	1	1	1	1	1	1	1	1	1.44399	1	1	1	1	1	1	1	1	1	1.32321	1	1.2357
ELLWOOD_MYC_TARGETS_DN_Up	1	1	1	1	1	1	1.45409	1	1	1.55505	1	1.74732	1.32126	1.24063	1.2881	1	1	1.27679	1	1.3746	1.17949	1.27042	1	1	1.28134	1.10649	1.21287	1.50363	1.22131	1	1.67769	1.48152	1.45927	1	1	1	1	1.19008	1.62066	1.16359	1.20925	1.22691	1	1	1	1	1
ELVIDGE_HIF1A_AND_HIF2A_TARGETS_DN_Down	1.10564	1	1.47089	1.33497	1	1.50142	1	1	1.26112	1	1	1	1.05679	1	1	1	1.50382	1	1.00312	1	1	1	1	1	1	1	1	1	1	1.40209	1	1	1	1.14663	1	1	1.03731	1	1	1	1	1.0218	1.48048	1	1	1	1.80273
ELVIDGE_HIF1A_AND_HIF2A_TARGETS_DN_Up	1	1	1	1	1	1	1.57085	1.58572	1	1	1	1	1	1	1	1.66718	1	1.18697	1	1.38349	1.3693	1	1	1	1.05496	1.1747	1.37673	1.04223	1.11704	1	1	1	1.07135	1	1	1.29167	1	1.09201	1.62773	1	1	1	1	1.71805	1.24229	1	1
ELVIDGE_HIF1A_AND_HIF2A_TARGETS_UP_Down	1	1	1	1	1	1	1	1	1	1	1	1	1	1	1	1	1	1.07703	1	1	1	1	1	1	1	1	1	1	1	1	1	1	1	1	1	1	1	1	1.17308	1	1	1	1	1.03562	1	1	1
ELVIDGE_HIF1A_AND_HIF2A_TARGETS_UP_Up	1	1	1	1	1	1	1	1.25637	1	1.05431	1	1	1	1.28246	1	1	1	1	1	1.083	1	1	1	1	1	1	1.06839	1	1	1.35312	1	1.30979	1.06692	1.39196	1	1	1.66472	1	1	1.25502	1	1.01405	1	1	1	1	1.03987
ELVIDGE_HIF1A_TARGETS_DN_Down	1.07627	1	1.52864	1.34196	1	1.34561	1	1	1.23681	1	1.02399	1	1	1	1	1	1.33858	1	1	1	1	1	1.08278	1	1	1	1	1	1	1.36547	1	1	1	1	1	1	1	1	1	1	1	1	1.53257	1	1	1.41624	1.91302
ELVIDGE_HIF1A_TARGETS_DN_Up	1	1	1	1	1	1	1.70279	1.79579	1	1	1	1	1	1.10512	1	1.79897	1	1.51397	1	1.50032	1.59059	1.35479	1	1	1	1.15196	1.49095	1	1.26855	1	1.00636	1	1.32608	1	1	1	1	1	1.58921	1	1	1	1	1.78846	1.22852	1	1
ELVIDGE_HIF1A_TARGETS_UP_Down	1	1	1.05878	1	1.15447	1	1	1	1	1	1	1	1	1	1	1	1	1	1	1	1	1	1	1	1	1	1	1	1	1	1.1822	1	1	1	1	1	1	1	1.30596	1	1	1	1.04757	1	1	1	1
ELVIDGE_HIF1A_TARGETS_UP_Up	1	1	1	1	1	1	1	1.44594	1	1	1	1	1	1	1	1	1	1	1	1	1	1	1	1	1	1	1	1	1	1	1	1	1	1.09976	1	1	1.35541	1	1	1	1.08789	1	1	1	1	1	1
ELVIDGE_HYPOXIA_BY_DMOG_DN_Down	1	1	1	1	1	1	1	1	1	1	1	1	1	1	1	1	1.27398	1.06729	1	1	1	1	1.13608	1	1	1.05093	1.01855	1	1.02164	1	1	1	1	1.12545	1	1	1	1.21733	1	1.16426	1	1	1	1	1	1	1
ELVIDGE_HYPOXIA_BY_DMOG_DN_Up	1	1	1	1	1	1	1	1.35923	1	1	1	1.16553	1	1	1	1	1	1	1	1	1	1	1	1	1	1	1	1	1	1	1.31124	1.18981	1.24107	1	1	1	1.27705	1	1	1	1	1	1	1	1	1	1
ELVIDGE_HYPOXIA_BY_DMOG_UP_Down	1.28765	1.03421	1.56259	1	1	1.41714	1	1	1.22106	1	1.0378	1	1.51218	1.11223	1.38728	1	1.34495	1	1	1	1	1	1	1	1	1	1	1	1	1.53866	1	1	1	1	1	1	1	1	1	1	1.03889	1.16227	1.55722	1	1	1	1.78545
ELVIDGE_HYPOXIA_BY_DMOG_UP_Up	1	1	1	1.05735	1.04139	1	1.67381	1.47676	1	1	1	1	1	1	1	1.57345	1	1.38026	1	1.51717	1.61675	1	1	1.03339	1.38195	1.10088	1.71531	1.13561	1.03244	1	1	1	1.21618	1	1	1	1	1.50253	1.7085	1	1	1	1	1.83433	1.38765	1	1
ELVIDGE_HYPOXIA_DN_Down	1	1	1	1	1.1274	1	1	1	1	1	1	1	1	1	1	1	1	1	1	1	1	1	1	1	1	1	1.13158	1	1	1	1	1	1	1	1	1.0191	1	1.1572	1.55741	1	1	1	1	1.04721	1	1	1
ELVIDGE_HYPOXIA_DN_Up	1	1	1	1	1	1	1	1.66835	1	1.13898	1	1.18085	1.24528	1	1.04465	1	1	1	1	1	1	1	1	1	1	1	1	1	1	1	1	1.01322	1	1	1	1	1.50084	1	1	1	1.21214	1	1	1	1	1	1
ELVIDGE_HYPOXIA_UP_Down	1.22748	1	1.67476	1	1	1.51184	1	1	1.13619	1	1.13607	1	1.43664	1.23544	1.3624	1	1.2245	1	1.0144	1	1	1	1	1	1	1	1	1	1	1.52362	1	1	1	1	1.07312	1	1	1	1	1	1.17675	1.24182	1.66356	1	1	1.0112	1.73595
ELVIDGE_HYPOXIA_UP_Up	1	1	1	1	1	1	1.67763	1.41157	1	1	1	1	1	1	1	1.48652	1	1.34658	1	1.50437	1.55463	1	1	1	1.33027	1	1.68895	1	1	1	1.10111	1	1.38077	1	1	1.18104	1	1.41358	1.71625	1	1	1	1	1.82531	1.3893	1	1
ENGELMANN_CANCER_PROGENITORS_DN_Down	1	1	1.21658	1	1	1.21506	1	1	1.51161	1	1	1	1	1	1	1	1	1	1.46584	1	1	1	1.35094	1.35355	1	1.11518	1	1.39685	1	1	1	1	1	1	1.70589	1	1.05773	1	1	1	1	1	1.20947	1	1	1	1
ENGELMANN_CANCER_PROGENITORS_DN_Up	1	1.09111	1	1.2329	1.54291	1	1.60496	1.7565	1	1.79571	1.40107	1.62902	1	1	1	1.34546	1.053	1.56511	1	1.57616	1.15282	1.23339	1	1	1.31885	1	1.5049	1	1.20691	1	1.14414	1	1.26223	1	1	1	1	1.33529	1.13013	1.10315	1	1.13927	1	1.38668	1.06351	1	1
ENGELMANN_CANCER_PROGENITORS_UP_Down	1.40094	1.16753	1.89565	1	1	1.43183	1	1.12082	1.12273	1	1.41577	1	1	1	1	1	1	1	1.295	1	1	1	1.24517	1	1.14637	1	1.29624	1	1	1	1	1.09986	1	1.2739	1.61576	1.18955	1	1.48781	1	1	1.07468	1.04973	1.88817	1	1	1	1.28274
ENGELMANN_CANCER_PROGENITORS_UP_Up	1	1	1	1	1.04605	1	1.3883	1	1	1.29035	1	1.0965	1	1	1	1	1.04664	1.07687	1	1.32503	1	1	1	1.55497	1	1	1	1	1	1.5587	1.19246	1	1	1	1	1	1	1	1.24401	1.29236	1	1	1	1.23648	1.06109	1.16726	1
ENK_UV_RESPONSE_EPIDERMIS_DN_Down	1.16283	1.0698	1.10977	1.0062	1	1.09993	1	1	1.07202	1	1.0838	1	1.21451	1.20427	1.40909	1	1.07946	1	1.17673	1	1	1.11499	1	1	1	1	1	1	1	1.14595	1	1	1	1	1	1	1	1	1	1	1.47223	1	1.11393	1	1	1	1.37932
ENK_UV_RESPONSE_EPIDERMIS_DN_Up	1	1	1	1	1	1	1.51283	1.03984	1	1.28245	1	1.08081	1	1	1	1.13558	1	1.03042	1	1.27603	1	1	1	1	1.13756	1	1	1	1	1	1.09176	1.05595	1.25946	1	1	1.18619	1.55627	1.47265	1.26368	1.11303	1	1	1	1.49248	1.2262	1	1
ENK_UV_RESPONSE_EPIDERMIS_UP_Down	1	1	1.35433	1	1	1	1	1	1	1	1.16955	1	1	1	1	1	1	1	1.08892	1	1	1	1	1	1	1	1.10489	1	1	1	1	1	1	1	1	1	1	1	1	1	1	1	1.36349	1	1	1	1.0204
ENK_UV_RESPONSE_EPIDERMIS_UP_Up	1	1.199	1	1	1.0157	1	1.21361	1.27611	1	1	1	1	1.20598	1	1.05169	1	1.0138	1.10984	1	1.21831	1	1.14554	1	1	1.08414	1	1	1	1	1	1	1	1.35972	1	1	1	1	1.19123	1	1	1	1	1	1.46629	1.12249	1.14294	1
ENK_UV_RESPONSE_KERATINOCYTE_DN_Down	1	1	1	1.59552	1	1	1	1.29286	1.7019	1.56905	1.06727	1	1.13859	1.17379	1.32928	1	1	1	1	1	1	1.00613	1	1	1	1	1.10291	1	1	1.03429	1	1	1	1	1	1	1	1.16804	1	1	1.57034	1.08009	1	1	1	1	1.02514
ENK_UV_RESPONSE_KERATINOCYTE_DN_Up	1	1	1.16128	1	1	1	1	1	1	1	1	1	1	1	1	1	1	1	1	1	1	1	1	1.14847	1	1	1	1	1.00458	1	1	1	1	1	1.13531	1	1	1	1	1	1	1	1.14038	1	1	1	1
ENK_UV_RESPONSE_KERATINOCYTE_UP_Down	1.61391	1	2.12985	1	1	1	1	1	1	1	1	1	1	1	1	1	1.26383	1	1	1	1	1	1.11786	1.20513	1	1	1	1	1	1	1	1	1	1	1.25569	1.1375	1.41144	1	1	1.20758	1	1	2.12676	1	1	1	1
ENK_UV_RESPONSE_KERATINOCYTE_UP_Up	1	1	1	1.45452	1	1	1.38543	1.97283	1.27429	1.94463	1	2.05431	2.58938	2.1352	2.56854	1.12703	1	1	1	1.33256	1.40644	2.23249	1	1	1.3247	1	1.26152	1.8327	1.78773	1.0984	1.17898	1	1	1	1	1	1	1.19593	1.36525	1	1.34334	1.02525	1	1.46863	1	1	1
EPPERT_CE_HSC_LSC_Down	1	1	1	1	1	1	1	1.48333	1.61104	1.12654	1.11571	1.30269	1.79998	1	1	1.30861	1	1	1	1	1	1	1.29546	1.31132	1.55828	1	1.58405	1.91498	1.03536	1	1	1.25211	1.0583	1	1.07049	1	1.71293	1	1	1	1.91841	1.18954	1	1	1	1	1
EPPERT_CE_HSC_LSC_Up	1.24689	1.29861	1	1	1.20578	1	1.84271	1	1	1	1	1	1	1	1.2071	1	1	1.78629	1	1.38538	1.19186	1.5099	1	1	1	1	1	1	1	1	1.34556	1	1	1	1	1	1	1	1	1.23335	1	1	1	1.17401	1.14529	1.22276	1
EPPERT_HSC_R_Down	1.1171	1.02964	1.08931	1.0649	1	1.24031	1	1.59961	1.59098	1.4248	1.59641	1	1.69512	1.35028	1.41473	1.08814	1	1	1	1	1	1	1	1	1.46931	1	1.45247	1.21082	1	1.27776	1.15704	1.07114	1.65764	1	1	1	1	1	1	1	1.92766	1.40319	1.08095	1	1	1	1.34691
EPPERT_HSC_R_Up	1	1	1	1	1.1333	1	1.51947	1	1	1	1	1	1	1	1	1	1	1.32495	1	1.16511	1.21294	1.00442	1	1	1	1	1	1	1	1	1	1	1	1.05716	1.35276	1	1	1.45128	1.06936	1.04673	1	1	1	1.06213	1.08873	1.17616	1
EPPERT_LSC_R_Down	1	1.10397	1	1	1	1	1	1.04707	1	1	1	1	1.36402	1.25483	1.49988	1	1.18668	1	1.18601	1	1.04084	1.40323	1	1	1	1	1.01156	1	1.05117	1.59267	1	1	1.59007	1	1	1	1	1	1.15335	1	1.34807	1	1	1	1	1	1
EPPERT_LSC_R_Up	1	1	1	1	1	1	1	1	1	1	1	1	1	1	1	1	1	1	1	1	1	1	1.0195	1.73786	1.03615	1	1	1.0434	1	1	1	1	1	1	1.26472	1	1.19404	1	1	1	1	1	1	1	1	1.19904	1
EPPERT_PROGENITOR_Down	1	1	1	1.72355	1.3254	1.19685	1	1	1.22399	1.49393	1.39276	1.03284	1	1	1	1.12055	1	1	1	1	1	1	1	1	1	1	1.13738	1	1	1	1	1	1	1	1	1.43405	1	1.62108	1.60578	1	1.43555	1	1	1	1	1	1.28324
EPPERT_PROGENITOR_Up	1	1	1.04624	1	1	1	1.11254	1	1	1	1	1	1	1	1	1	1	1	1.08264	1	1	1	1	1.36141	1.07933	1	1	1	1	1	1.19863	1	1.28876	1.08734	1	1	1	1	1	1.02793	1	1	1.04718	1	1	1.32931	1
FAELT_B_CLL_WITH_VH_REARRANGEMENTS_DN_Down	1.10721	1.14545	1	1	1	1	1	1	1	1	1	1	1	1	1	1	1	1	1	1	1	1	1	1	1	1	1.08805	1	1	1	1	1	1	1	1	1	1	1	1	1	1	1	1	1	1	1	1
FAELT_B_CLL_WITH_VH_REARRANGEMENTS_DN_Up	1	1	1	1	1	1.50506	1	1	1	1	1	1.28958	1.49329	1.50653	1.55555	1	1	1	1	1	1	1.5453	1	1	1	1.02274	1	1	1	1	1.0968	1	1	1	1	1	1.4164	1	1	1	1	1	1	1	1	1	1
FAELT_B_CLL_WITH_VH_REARRANGEMENTS_UP_Down	1	1	1	1.60455	1	1.36007	1	1	1	1	1	1	1	1.51414	1.32292	1	1.10195	1	1	1	1	1.09582	1.09833	1	1	1	1	1	1	1.25342	1	1	1.07105	1.12959	1	1	1	1	1	1	1.13916	1.34557	1	1	1	1	1.27077
FAELT_B_CLL_WITH_VH_REARRANGEMENTS_UP_Up	1	1	1	1	1	1	1.05917	1	1	1	1	1	1	1	1	1	1	1	1	1.30345	1.08953	1	1	1	1.26662	1	1	1	1	1	1.12697	1	1	1	1	1	1.59705	1.23038	1.13436	1	1	1	1	1.45801	1.29769	1.21326	1
FAELT_B_CLL_WITH_VH3_21_DN_Down	1.38274	1.09284	1.46747	1.14354	1.64395	1	1	1	1	1	1.32753	1	1	1	1	1	1	1.21185	1.03529	1	1	1	1	1	1	1	1	1	1	1	1	1	1	1	1	1	1	1	1	1	1.03142	1	1.474	1	1	1	1
FAELT_B_CLL_WITH_VH3_21_DN_Up	1	1	1	1	1	1	1	1	1	1	1	1.46635	1.04511	1	1	1	1	1	1	1	1	1	1	1	1	1	1	1	1	1	1	1.00539	1	1	1.06518	1	1.34823	1	1.3217	1	1	1	1	1	1	1.10627	1
FAELT_B_CLL_WITH_VH3_21_UP_Down	1	1	1.30436	1	1	1.41034	1	1	1	1	1	1	1	1	1	1.03493	1	1.34066	1.06592	1	1.13252	1	1	1.2122	1	1	1	1	1.12518	1.04478	1	1	1	1.05718	1	1	1	1.41731	1.14423	1.18315	1	1	1.30862	1	1.45259	2.2638	1
FAELT_B_CLL_WITH_VH3_21_UP_Up	1	1	1	1	1	1	1	1	1	1	1	1	1.02141	1	1	1	1	1	1	1	1	1	1	1	1.36448	1	1	1	1	1	1	1.21102	1	1	1.16736	1.49429	1.03044	1	1	1	1.01827	1	1	1	1	1	1
FALVELLA_SMOKERS_WITH_LUNG_CANCER_Down	1.07607	1.18993	1.07008	1.01335	1	1	1	1.22375	1.16451	1.55219	1.14575	1.21904	1.76071	1.33348	1.85044	1	1.18769	1	1	1	1	1.36004	1	1.06493	1	1	1	1	1	1.08449	1	1	1.05468	1	1	1	1	1	1	1	1.66642	1.21909	1.0796	1	1.16836	1	1.416
FALVELLA_SMOKERS_WITH_LUNG_CANCER_Up	1	1	1	1	1.21189	1	1.14153	1	1	1	1	1	1	1	1	1.14297	1	1	1.01842	1.25575	1.32442	1	1	1	1	1.03556	1.39944	1	1	1	1	1.01121	1	1	1	1.44283	1	1	1.24465	1	1	1	1	1	1	1.10577	1
FARDIN_HYPOXIA_11_Down	1.15993	1	1.61825	1.13913	1.27254	1	1	1	1	1	1.12316	1	1	1	1	1	1	1	1.14065	1	1	1	1	1	1.02632	1	1	1	1	1.01664	1	1	1	1	1	1.16585	1	1	1	1.47496	1	1.13668	1.61485	1	1	1.009	1.27238
FARDIN_HYPOXIA_11_Up	1	1	1	1	1	1	1.29709	1.71511	1	1.29846	1	1.4064	1	1	1	1.34534	1	1.28229	1	1.00488	1	1	1.05946	1.12327	1	1.15617	1	1	1	1	1.08752	1	1	1	1	1	1	1	1.75213	1	1	1	1	1.42271	1.49928	1	1
FARMER_BREAST_CANCER_APOCRINE_VS_BASAL_Down	1	1	1	1.12911	1	1.1587	1	1	1.37427	1.06254	1.51772	1.19138	1	1	1	1	1	1	1.22706	1	1	1	1	1.3099	1	1	1	1	1	1.12524	1	1	1	1	1	1	1	1	1	1	1.23467	1	1	1	1	1	1.24542
FARMER_BREAST_CANCER_APOCRINE_VS_BASAL_Up	1	1	1	1	1	1	1.46312	1	1	1	1	1	1.06558	1	1.02275	1.15708	1	1.31904	1	1.16852	1	1.10305	1	1	1	1	1	1	1	1	1.08048	1	1.21806	1	1	1	1.01971	1	1	1.28037	1	1.04434	1	1	1	1	1
FARMER_BREAST_CANCER_APOCRINE_VS_LUMINAL_Down	1	1	1	1.22929	1	1.04173	1	1	1.12445	1	1.444	1	1	1	1	1	1.04109	1	1.50358	1	1.37221	1	1	1.16685	1.09917	1	1	1	1	1.11942	1	1	1	1	1	1	1	1	1	1	1.49084	1	1	1	1	1	1.43989
FARMER_BREAST_CANCER_APOCRINE_VS_LUMINAL_Up	1	1	1	1	1	1	1.33951	1	1	1.1362	1	1.03243	1	1.13676	1	1.24347	1	1.15562	1	1.232	1	1	1.01259	1	1	1	1.22375	1	1	1	1	1	1.08881	1	1.0262	1	1.50207	1.12052	1.38519	1.00102	1	1	1	1	1	1	1
FARMER_BREAST_CANCER_BASAL_VS_LULMINAL_Down	1	1	1.0922	1.26192	1	1.23886	1	1	1	1	1.53005	1	1	1	1	1	1.15436	1	1.31482	1	1.2318	1	1	1.08774	1	1.1008	1	1	1	1.2109	1	1	1	1	1	1	1	1.01991	1	1	1.51442	1	1.10478	1	1	1	1.58799
FARMER_BREAST_CANCER_BASAL_VS_LULMINAL_Up	1	1	1	1	1	1	1.41516	1.19342	1	1.1337	1	1	1	1.04737	1	1.24475	1	1.10868	1	1.15606	1	1	1	1	1	1	1	1	1	1	1	1	1.23372	1	1	1	1.29456	1	1.00976	1.44176	1	1	1	1.12238	1	1.17411	1
FARMER_BREAST_CANCER_CLUSTER_2_Down	1	1	1	2.48498	2.38935	1.97972	1	1	1.16938	2.54033	2.37008	1.96736	1	2.26871	1.08625	1.08961	1	1	1	1.72012	1.74536	1.33567	1	1	1	1.48152	1.29796	1	1	1	1	1	1	1	1	1	1	2.00069	1.92849	1	1.24681	1	1	1	1	1	1
FARMER_BREAST_CANCER_CLUSTER_2_Up	1.81747	1.45099	1.90928	1	1	1	1.19346	1	1	1	1	1	1.23295	1	1	1	1.23596	1	1	1	1	1	1	1.12019	2.12482	1	1	1.54251	1.86268	1	1	1	1	1	1	1	1	1	1	1	1	1	1.89597	1	1	1.58403	1
FERNANDEZ_BOUND_BY_MYC_Down	1	1	1.48693	1	1	1.1029	1	1	1.32567	1	1.26189	1	1	1	1	1	1	1	1.04747	1	1	1	1	1.05209	1	1	1	1	1	1	1	1	1	1	1.08385	1	1	1.49835	1	1	1	1	1.48122	1	1	1	1
FERNANDEZ_BOUND_BY_MYC_Up	1	1	1	1	1	1	1.22342	1.3039	1	1	1	1	1.38174	1.07398	1.25867	1	1	1	1	1.24836	1.07194	1.1029	1	1	1.36701	1	1.23859	1	1	1	1.12841	1	1.21034	1	1	1	1	1	1	1	1	1	1	1.18166	1	1	1
FERRANDO_T_ALL_WITH_MLL_ENL_FUSION_DN_Down	1	1	1	1.38551	1.30621	1	1	1	1	1.16283	1.2372	1.46717	1	1	1	1.19445	1	1.18018	1	1	1	1	1	1	1	1.0221	1	1	1	1	1	1	1	1	1.00602	1	1	1.87488	1.65871	1	1	1	1	1	1	1	1.24556
FERRANDO_T_ALL_WITH_MLL_ENL_FUSION_DN_Up	1	1	1	1	1	1	1	1.8572	1	1	1	1	1.84298	1.51288	1.84338	1	1.20109	1	1	1.03946	1	1.65663	1	1	1.66344	1	1.25087	1	1.00236	1	1	1	1.29638	1.06233	1	1	1.011	1	1	1	1	1	1	1	1	1.19022	1
FERRANDO_T_ALL_WITH_MLL_ENL_FUSION_UP_Down	1	1	1	1	1	1	1	1	1.17242	1	1.18215	1	1	1	1	1	1	1	1	1	1	1	1	1	1	1	1.21278	1	1	1.31008	1	1.37871	1	1.33208	1.31695	1	1	1	1.52263	1	1.33634	1.22387	1	1	1	1.09057	1.17738
FERRANDO_T_ALL_WITH_MLL_ENL_FUSION_UP_Up	1	1	1	1.05696	1.39297	1.0906	1.29897	1	1	1	1	1	1.32317	1.07806	1.23198	1	1	1.01137	1.61494	1.35421	1.69843	1.38688	1	1	1	1	1	1	1	1	1.87228	1	1	1	1	1	1	1	1	1	1	1	1	1.35941	1.2106	1	1
FERREIRA_EWINGS_SARCOMA_UNSTABLE_VS_STABLE_DN_Down	1.05309	1	1.26868	1	1	1.01197	1	1	1	1	1	1	1	1	1	1	1.46257	1	1.38934	1	1	1	1	1	1	1	1	1	1	1	1	1	1.38144	1	1.09415	1	1	1	1	1	1	1	1.2784	1	1	1	1
FERREIRA_EWINGS_SARCOMA_UNSTABLE_VS_STABLE_DN_Up	1	1	1	1.21218	1.0678	1	1	1.05914	1.17442	1.3121	1.19601	1.07725	1.11295	1.17375	1.1004	1.18975	1	1	1	1.33212	1	1.23134	1	1	1	1	1.49881	1	1	1.05477	1.05209	1	1	1	1	1	1	1.63373	1.34478	1.19226	1.25294	1.30767	1	1.27126	1.1939	1.12689	1
FERREIRA_EWINGS_SARCOMA_UNSTABLE_VS_STABLE_UP_Down	1	1	1	2.18923	1.89297	1.47865	1	1.37179	1	2.49668	2.06489	2.10557	1	1.86512	1.09897	1	1	1	1	1	1	1	1	1	1	1	1.21702	1	1	1	1.27474	1	1	1	1	1.11722	1	2.00101	1.51003	1	1.26164	1	1	1	1	1	1
FERREIRA_EWINGS_SARCOMA_UNSTABLE_VS_STABLE_UP_Up	1.51813	1	1.94201	1	1	1	1	1	1	1	1	1	1.21052	1	1	1	1.21965	1.15371	1	1	1	1	1.25883	1.4428	2.20908	1	1	1.30744	1.37591	1	1	1	1.35679	1	1	1	1	1	1	1	1	1	1.92495	1	1	1.44133	1
FEVR_CTNNB1_TARGETS_DN_Down	1	1	1	2.40078	1	1.63214	1	1	1.273	2.10151	2.16582	1.8438	1	1	1	1	1	1	1	1	1	1	1	1	1	1	1.36984	1	1	1	1	1	1	1	1	1	1	2.36731	2.07777	1	1.0872	1	1	1	1	1	1.0083
FEVR_CTNNB1_TARGETS_DN_Up	1	1	1.28296	1	1	1	1	1	1	1	1	1	1.43227	1	1.10285	1	1	1	1	1	1	1.0346	1.05508	1.14238	2.0188	1	1	1.03383	1.46558	1	1	1	1	1.14203	1	1	1	1	1	1	1	1	1.25175	1	1	1.1125	1
FEVR_CTNNB1_TARGETS_UP_Down	1.20757	1	1.36865	1	1	1.03175	1	1	1	1	1	1	1	1	1	1	1.31527	1	1.40972	1	1	1	1.11087	1.1922	1	1.06697	1	1	1.15073	1	1	1	1	1.38486	1.29066	1	1	1	1	1.0471	1.33868	1.02251	1.37512	1	1	1	1
FEVR_CTNNB1_TARGETS_UP_Up	1	1	1	1.26593	1.26287	1	1.62609	1.32983	1	1.86332	1.41752	1.47402	1	1.04536	1	1.54619	1	1.39243	1	1.43248	1.18483	1.12202	1	1	1.16244	1	1.51051	1	1	1	1.47886	1.03611	1.54269	1	1	1.13064	1	2.20964	1.83252	1	1	1	1	1.70863	1.48296	1.25537	1
FIGUEROA_AML_METHYLATION_CLUSTER_1_DN_Down	1.17254	1	1.30426	1	1	1.52008	1	1.19813	1	1	1.07077	1	1.20732	1	1.08131	1	1	1	1	1	1	1	1	1	1	1.28889	1	1	1	1.05525	1	1	1.13631	1.30061	1	1	1	1.03506	1	1.22905	1	1	1.29284	1	1	1	1.06835
FIGUEROA_AML_METHYLATION_CLUSTER_1_DN_Up	1	1	1	1	1	1	1.1729	1	1.00195	1	1	1	1	1	1	1	1.06265	1.14808	1	1	1	1	1	1	1.62757	1	1	1	1	1	1.22848	1	1	1	1	1.08116	1	1	1	1	1	1	1	1.30616	1	1.12906	1
FIGUEROA_AML_METHYLATION_CLUSTER_1_UP_Down	1.14425	1.29842	1	1	1	1	1	1.36031	1	1	1	1	1	1	1	1.01129	1	1	1	1	1	1	1	1.13336	1.23125	1	1	1.02959	1	1.18795	1	1	1	1	1	1	1.11852	1	1	1	1.31838	1.13508	1	1	1	1	1
FIGUEROA_AML_METHYLATION_CLUSTER_1_UP_Up	1	1	1	1	1	1.26428	1.00627	1	1.13444	1	1	1	1	1	1	1	1.26536	1.03261	1	1.01769	1.08461	1	1.03056	1	1	1	1	1	1	1	1	1	1.11871	1	1.01541	1	1	1	1.64875	1	1	1	1	1	1.02609	1.21572	1
FIGUEROA_AML_METHYLATION_CLUSTER_2_UP_Down	1	1	1	1	1	1	1.08333	1.7013	1	1.35015	1	1	1	1	1	1	1	1	1	1.06215	1	1	1	1.51004	1.01214	1	1	1.35636	1	1	1	1.03613	1	1	1.33361	1	1.22334	1	1.38192	1	1.08603	1.19862	1	1	1	1	1
FIGUEROA_AML_METHYLATION_CLUSTER_2_UP_Up	1.11014	1	1	1	1	1.02818	1	1	1	1	1	1	1	1	1	1	1	1	1	1	1	1	1	1	1	1	1	1	1	1	1	1	1.1966	1	1	1	1	1	1	1	1	1	1	1	1	1	1
FIGUEROA_AML_METHYLATION_CLUSTER_3_DN_Down	1.38155	1	1.07886	1	1	1	1	1	1	1	1	1	1	1	1	1	1	1	1	1	1	1	1	1	1	1.07038	1.18531	1	1	1	1	1.3523	1.24747	1	1	1	1	1	1	1	1	1.09212	1.0954	1	1	1	1
FIGUEROA_AML_METHYLATION_CLUSTER_3_DN_Up	1	1	1	1.21951	1.28799	1	1	1.02597	1	1.19598	1	1	1	1	1	1	1	1	1	1.16094	1.1058	1	1	1.03698	1.55885	1	1	1	1	1	1	1	1	1	1	1	1	1.08358	1	1	1	1	1	1	1	1.21909	1
FIGUEROA_AML_METHYLATION_CLUSTER_3_UP_Down	1	1.18774	1	1.4236	1	1.01859	1	1.62016	1.22396	1.46498	1.44754	1.1047	1.15916	1.27334	1.41098	1	1	1	1	1	1	1	1	1.06153	1	1	1.28872	1.39025	1.5269	1.05601	1	1.09295	1	1.17671	1	1	1.31709	1.18551	1	1	1.5953	1.31878	1	1	1	1	1
FIGUEROA_AML_METHYLATION_CLUSTER_3_UP_Up	1	1	1	1	1	1	1	1	1	1	1	1	1	1	1	1	1	1	1	1.12313	1.16209	1	1	1	1	1	1	1	1	1	1.07187	1	1.01812	1	1	1	1	1	1.22933	1	1	1	1	1	1	1	1
FIGUEROA_AML_METHYLATION_CLUSTER_4_UP_Down	1	1.03095	1	1	1	1	1	1.36797	1.31664	1.23996	1.06049	1	1	1	1	1	1	1	1	1	1	1	1	1	1	1	1	1	1	1	1	1.07779	1	1	1.32495	1	1.19782	1	1	1	1	1	1	1	1	1	1
FIGUEROA_AML_METHYLATION_CLUSTER_4_UP_Up	1	1	1	1	1	1	1	1	1	1	1	1	1	1	1	1	1.15691	1.07131	1	1.30376	1.29222	1.24652	1.30316	1	1	1	1	1	1	1	1.40042	1	1	1	1	1	1	1	1.35069	1	1	1	1	1	1	1.05147	1
FIGUEROA_AML_METHYLATION_CLUSTER_5_DN_Down	1	1	1	1	1	1	1	1	1	1	1	1	1.44146	1.35438	1.5176	1	1	1	1	1	1	1	1.186	1	1	1	1	1	1	1	1	1	1	1	1.57268	1	1	1	1	1	1	1	1	1	1	1	1
FIGUEROA_AML_METHYLATION_CLUSTER_5_DN_Up	1	1	1	1	1	1	1.20923	1	1	1.14004	1	1	1	1	1	1	1.60023	1.29565	1.25743	1.32576	1.5013	1.04606	1	1	1	1	1	1	1	1	1.68052	1	1.03453	1	1	1	1	1	1	1.091	1	1	1	1.44654	1.45608	1.57158	1
FIGUEROA_AML_METHYLATION_CLUSTER_6_DN_Down	1	1	1	1	1	1	1	1	1.63174	1	1.69232	1	1	1	1	1	1	1	1	1	1	1	1	1	1.31617	1	1	1.0892	1	1	1	1	1	1	1	1	1	1	1	1	1	1	1	1	1	1	1
FIGUEROA_AML_METHYLATION_CLUSTER_6_DN_Up	1	1	1	1	1	1	1	1	1	1	1	1	1.36713	1.17851	1.85982	1	1	1	1	1	1	1	1	1	1	1	1	1	1	1	1	1	1	1	1	1	1	1	1	1	1	1	1	1	1	1	1
FIGUEROA_AML_METHYLATION_CLUSTER_6_UP_Down	1	1.11616	1	1	1	1	1	1.51601	1.09695	1.14186	1	1	1	1	1	1	1	1	1	1	1	1	1	1	1	1.02233	1	1.03005	1	1	1	1.36054	1.06073	1.13147	1.18949	1.08765	1	1	1	1	1	1	1	1	1	1	1
FIGUEROA_AML_METHYLATION_CLUSTER_6_UP_Up	1	1	1	1	1	1	1	1	1	1	1	1	1	1	1	1	1.07147	1	1	1.02956	1.05503	1	1	1	1	1	1	1	1	1	1.3785	1	1	1	1	1	1	1.01588	1.55512	1	1	1	1	1	1	1.08168	1
FIGUEROA_AML_METHYLATION_CLUSTER_7_UP_Down	1	1	1	1	1	1	1	1.75082	1	1.17467	1	1.03108	1	1	1	1.18285	1	1	1	1	1	1	1	1	1	1	1	1	1	1	1	1.22086	1	1.19037	1.34235	1	1.36701	1	1	1	1	1	1	1	1	1	1
FIGUEROA_AML_METHYLATION_CLUSTER_7_UP_Up	1	1	1	1	1	1	1	1	1	1	1	1	1	1	1	1	1.19761	1	1	1.12996	1.10805	1	1	1	1	1	1	1	1	1	1.07437	1	1	1	1	1	1	1	1.30553	1	1	1	1	1	1	1	1
FINETTI_BREAST_CANCERS_KINOME_BLUE_Down	1	1	1	1	1	1	1	1	1	1	1	1	1	1	1	1	1	1	1	1	1	1.23447	1	1	1	1	1	1	1	1	1	1	1	1	1	1	1	1	1	1	1	1	1	1	1	1	1
FINETTI_BREAST_CANCERS_KINOME_BLUE_Up	1	1	1	1	1	1	1	1	1	1.15795	1	1	1	1	1	1	1	1	1	1	1	1	1	1	1	1	1.06277	1	1.04922	1	1	1	1	1	1	1	1	1	1	1	1	1	1	1	1	1	1
FIRESTEIN_CTNNB1_PATHWAY_Down	1	1	1	1.60155	1.20933	1.27239	1	1	1	1	1	1.44557	1.44569	2.04079	1.80981	1.08267	1	1.31771	1	1	1	1.55663	1	1	1	1	1	1	1.27418	1.15386	1	1	1.09774	1.21505	1	1	1	1	1.48498	1	1	1.14054	1	1	1	1	1
FIRESTEIN_CTNNB1_PATHWAY_Up	1.64805	1.05785	1.84854	1	1	1	1	1	1	1	1	1	1	1	1	1	1	1	1	1	1	1	1.0236	1.33838	1.0126	1.27807	1	1.08255	1	1	1	1	1	1	1	1	1.38151	1	1	1	1	1	1.82803	1	1	1	1
FIRESTEIN_PROLIFERATION_Down	1.00554	1.21737	1	1	1	1	1	1.5407	1	1.15448	1	1.15912	2.01601	1.76876	2.00939	1	1	1	1	1	1	1.6796	1.29399	1.02212	1	1.10367	1	1.20281	1	1.17065	1	1	1	1	1	1	1	1	1	1.22829	1.21565	1.27954	1	1.18725	1	1	1.29035
FIRESTEIN_PROLIFERATION_Up	1	1	1.11637	1	1.08204	1	1	1	1	1	1	1	1	1	1	1	1.24281	1.23775	1	1	1	1	1	1	1	1	1	1	1	1	1	1.21718	1	1	1.30213	1.01356	1	1	1	1	1	1	1.11946	1	1	1	1
FISCHER_DIRECT_P53_TARGETS_META_ANALYSIS_Down	2.18844	1.65543	2.29734	1	1	1.31664	1	1	1	1	1	1	1	1	1	1	1.18584	1	1.24329	1	1	1	1.0288	1	1	1.03152	1	1	1	1.2825	1	1.11073	1.15515	1	1	1.01889	1	1	1	1	1.1042	1	2.30417	1	1	1	1
FISCHER_DIRECT_P53_TARGETS_META_ANALYSIS_Up	1	1	1	1	1	1	1.41898	1	1	1.04422	1	1.03438	1	1	1	1.15599	1	1	1	1.26611	1	1	1	1	1.18359	1	1	1	1	1	1	1	1	1.0981	1	1	1	1.83782	1	1	1	1	1	1.37184	1	1	1.16726
FISCHER_DREAM_TARGETS_Down	1	1	1	2.6327	1	2.07173	1	1	1	2.38832	2.19215	1.97931	1	1.485	1	1	1.01757	1	1	1	1	1	1	1	1	1.10286	1.41815	1	1	1	1	1	1	1	1	1.22025	1	2.59707	1.67273	1	1	1	1	1	1	1	1
FISCHER_DREAM_TARGETS_Up	1.60612	1	2.10414	1	1	1	1	1	1	1	1	1	1.42701	1	1	1	1	1	1	1	1	1	1.12534	1.3965	2.46575	1	1	1.34125	1.72408	1.05376	1	1	1.23537	1.04064	1	1	1	1	1	1	1	1	2.06579	1	1	1.17567	1
FISCHER_G1_S_CELL_CYCLE_Down	1	1	1	1.90031	1	1.95558	1	1	1	1.34856	1.57728	1.32381	1	1.27649	1.12297	1	1	1.02418	1	1	1	1.14478	1	1	1	1.03657	1.18717	1	1	1	1	1	1	1	1	1.29264	1	1.1984	1.15107	1	1.12214	1	1	1	1	1	1.02344
FISCHER_G1_S_CELL_CYCLE_Up	1.34728	1.27465	1.39429	1	1	1	1	1	1	1	1	1	1	1	1	1	1	1	1	1.09078	1	1	1	1.12174	1.90879	1	1	1.14226	1.4538	1	1	1.09034	1.1215	1.95353	1	1	1	1	1	1	1	1	1.38228	1	1	1.35037	1
FISCHER_G2_M_CELL_CYCLE_Down	1	1	1	2.82411	1	2.38861	1	1	1	2.63093	2.5565	2.04494	1	2.35916	1.35269	1	1	1	1.02798	1	1.01911	1.25812	1	1	1	1.39219	1.38569	1	1	1	1	1	1	1.23589	1	1	1	1.8642	1.19609	1	1.5496	1.34661	1	1	1	1	1
FISCHER_G2_M_CELL_CYCLE_Up	1.50458	1	1.85706	1	1	1	1	1.13412	1	1	1	1	1.06779	1	1	1	1	1.35279	1	1	1	1	1.12956	1	2.55147	1	1	1.2413	1.44183	1	1	1	1.26758	1	1	1	1.33239	1	1	1	1	1	1.86358	1.12851	1	1.51548	1
FLECHNER_BIOPSY_KIDNEY_TRANSPLANT_OK_VS_DONOR_DN_Down	1	1	1.26585	1	1	1	1	1	1	1	1	1	1	1	1	1	1.54131	1	1	1	1	1	1	1	1	1	1	1	1.09366	1	1	1.10766	1	1	1	1	1	1	1	1	1	1.04246	1.2406	1	1	1	1
FLECHNER_BIOPSY_KIDNEY_TRANSPLANT_OK_VS_DONOR_DN_Up	1	1	1	1	1	1	1.39797	1	1.01064	1	1.13228	1	1	1	1	1.79529	1	1	1	1	1	1	1	1.24368	1	1	1.06111	1	1	1	1	1	1	1	1	1	1	1	1	1	1	1	1	1	1	1.1335	1
FLECHNER_BIOPSY_KIDNEY_TRANSPLANT_OK_VS_DONOR_UP_Down	1.13276	1.3377	1	1.76722	1	1	1	1.12026	2.01104	1.33817	1.75667	1	1	1	1	1	1	1	1	1	1	1	1	1	1	1	1.06192	1	1	1.15159	1	1	1	1	1	1	1	1	1.09249	1	1.66794	1.06897	1	1	1	1	1.10154
FLECHNER_BIOPSY_KIDNEY_TRANSPLANT_OK_VS_DONOR_UP_Up	1	1	1	1	1	1	1.29631	1	1	1	1	1	1	1.02745	1	1	1	1	1	1.39842	1.37226	1.01742	1	1	1	1	1	1	1.27572	1	1	1	1	1	1	1	1.15413	1	1	1.05838	1	1	1	1.37017	1	1	1
FLECHNER_BIOPSY_KIDNEY_TRANSPLANT_REJECTED_VS_OK_DN_Down	1.2425	1.32869	1	1.33633	1	1	1	1	1.20486	1	1	1	1	1	1	1	1	1	1.37708	1	1	1	1	1	1.10376	1	1	1	1	1	1	1	1	1	1	1	1	1	1	1	1.55278	1	1	1	1	1	1.18111
FLECHNER_BIOPSY_KIDNEY_TRANSPLANT_REJECTED_VS_OK_DN_Up	1	1	1	1	1	1	1.19605	1	1	1.50068	1	1.56444	1	1.51919	1.03661	1.11064	1	1.57957	1	1.26394	1	1.05097	1	1	1	1	1	1	1	1	1.01376	1	1	1	1	1	1.02321	1	1.14873	1.0731	1	1	1	1.04892	1	1.05833	1
FLECHNER_BIOPSY_KIDNEY_TRANSPLANT_REJECTED_VS_OK_UP_Down	1.50409	1.41418	1.52366	1	1	1	1	1	1.24964	1	1	1	1	1	1	1	1	1	1.17626	1	1	1	1.91023	1.3422	1.79748	1.80398	1	1.89472	1	1	1.07554	1	1	1	1	1.26832	1.21234	1	1	1.71099	1.86936	2.08392	1.49699	1	1	1	1.09675
FLECHNER_BIOPSY_KIDNEY_TRANSPLANT_REJECTED_VS_OK_UP_Up	1	1	1	1	1.48185	1	1.71685	1.5556	1	1.63875	1	1.70396	1.53087	1.76061	1.38079	1.05038	1.44574	1.50993	1	1.55895	1.16518	1.7632	1	1	1	1	1.09226	1	1.08317	1.07658	1	1.04776	1.23621	1	1	1	1	1.9905	1.0401	1	1	1	1	1.17115	1.53601	1.56131	1
FLECHNER_PBL_KIDNEY_TRANSPLANT_OK_VS_DONOR_DN_Down	1	1	1	1	1	1	1	1	1.52845	1	1	1	1	1	1	1	1	1	1	1	1	1	1	1	1	1	1.46199	1.04894	1	1	1	1	1.17632	1	1	1	1	1	1	1	1	1	1	1	1	1	1
FLECHNER_PBL_KIDNEY_TRANSPLANT_OK_VS_DONOR_DN_Up	1	1	1	1	1	1	1.21334	1	1	1	1	1	1	1	1	1	1	1	1	1	1	1	1	1	1	1	1	1	1	1	1	1	1	1	1	1	1.02154	1.22795	1	1	1	1	1	1	1.00532	1	1.24135
FLECHNER_PBL_KIDNEY_TRANSPLANT_OK_VS_DONOR_UP_Down	1.56779	1.25331	1.60366	1	1.23332	1	1	1	1.21155	1	1.30179	1	1	1	1	1	1	1.09837	1	1	1	1	1	1	1	1	1	1	1	1	1	1.06412	1	1	1	1.13399	1	1	1	1	1	1	1.61862	1	1	1	1
FLECHNER_PBL_KIDNEY_TRANSPLANT_OK_VS_DONOR_UP_Up	1	1	1	1	1	1	1	1.0316	1	1	1	1.12576	1.60126	1.00291	1.35782	1	1	1	1	1	1	1.02409	1	1	1	1	1.06588	1	1	1	1	1	1	1	1	1	1	1	1.08217	1	1	1	1	1	1	1	1
FLECHNER_PBL_KIDNEY_TRANSPLANT_REJECTED_VS_OK_DN_Down	1.28202	1.14372	1.3921	1	1	1	1	1	1.33201	1.11205	1.73413	1.09705	1	1	1	1	1	1	1.00523	1	1	1	1	1.17978	1.3156	1	1	1	1	1	1	1	1	1.23009	1	1	1	1	1	1	1	1	1.38982	1	1	1	1
FLECHNER_PBL_KIDNEY_TRANSPLANT_REJECTED_VS_OK_DN_Up	1	1	1	1	1	1	1.26573	1	1	1	1	1	2.16571	1	1.76964	1	1	1	1	1	1	1.22261	1	1	1	1	1	1	1	1	1	1	1	1	1.61403	1	1	1	1	1	1	1	1	1	1	1	1
FLECHNER_PBL_KIDNEY_TRANSPLANT_REJECTED_VS_OK_UP_Down	1	1	1	1	1.03252	1	1	1	1	1	1.42759	1.03229	1	1	1	1	1	1.02268	1.09287	1	1	1	1	1	1	1	1	1	1	1	1	1	1	1	1	1	1	1	1.02832	1	1	1	1	1	1	1	1.11172
FLECHNER_PBL_KIDNEY_TRANSPLANT_REJECTED_VS_OK_UP_Up	1	1	1	1	1	1	1.13852	1.06636	1	1	1	1	1.07642	1	1	1	1	1	1	1.16258	1	1	1	1	1	1	1	1	1	1	1	1	1	1	1	1	1	1	1	1	1	1	1	1.04023	1	1	1
FLORIO_NEOCORTEX_BASAL_RADIAL_GLIA_DN_Down	1	1	1	2.99201	2.07234	2.78417	1	1	1	2.61814	2.51174	2.15489	1	1.77821	1	1	1	1	1	1	1	1	1	1	1	1.59948	1.2191	1	1	1.11382	1	1.58279	1	1.41387	1.61578	2.19748	1	2.41746	1.24495	1	1.31877	1.01474	1	1	1	1	1
FLORIO_NEOCORTEX_BASAL_RADIAL_GLIA_DN_Up	1.94324	1.40297	2.06589	1	1	1	1.29711	1.45558	1.1965	1	1	1	1.37341	1	1	1.29379	1.18772	1.62978	1	1.35264	1.42191	1.15966	1	1	2.76334	1	1	1.43756	1.77049	1	1.54054	1	1.86997	1	1	1	1.46812	1	1	1	1	1	2.07328	1.45066	1.20804	1.56605	1
FLORIO_NEOCORTEX_BASAL_RADIAL_GLIA_UP_Down	1	1	1.06469	1	1	1.979	1	1.34928	1	1	1	1.51817	2.20815	1	1.40864	1	1	1	1.6244	1	1.16551	1	1	1	1	1.38242	1	1	1.36545	1.63799	1	1.19869	1	1	1.25067	1	1.22249	1	1	1	2.43511	1.76561	1.05606	1	1	1	1.19651
FLORIO_NEOCORTEX_BASAL_RADIAL_GLIA_UP_Up	1.19504	1.24487	1	1.48558	1.87834	1	1.89118	1	1.15325	1.41891	1.20058	1	1	1.46333	1	1.57587	1.34009	1.97953	1	1.51574	1	1.46356	1.09294	1.34113	1.26678	1	1.1353	1	1	1	1.80937	1	1.25778	1	1	1.2929	1	1.62126	1.32861	1.70563	1	1	1	1.94463	1.74512	1.84961	1
FLOTHO_PEDIATRIC_ALL_THERAPY_RESPONSE_DN_Down	1	1	1	1.73285	1	1.91271	1	1.06774	1	1.54628	1.47793	1.47306	1	1.77961	1.36871	1	1	1	1.36728	1	1.03758	1.20616	1	1.05197	1	1	1	1	1	1	1	1	1	1	1	1	1	1	1	1	1.7099	1.33935	1	1	1	1	1
FLOTHO_PEDIATRIC_ALL_THERAPY_RESPONSE_DN_Up	1.05267	1.31919	1	1	1.11641	1	1.28503	1	1	1	1	1	1	1	1	1	1.05804	1.36384	1	1.0806	1	1	1	1	1.83701	1	1	1.24497	1	1	1	1	1	1	1	1	1	1	1	1	1	1	1	1.0726	1	1	1
FLOTHO_PEDIATRIC_ALL_THERAPY_RESPONSE_UP_Down	1.4023	1	1.7656	1	1	1	1	1	1	1	1.8007	1	1	1	1	1	1	1	1	1	1	1	1	1	1.12027	1.097	1	1	1	1	1	1	1.03666	1	1	1	1	1	1	1	1	1	1.7601	1	1	1	1
FLOTHO_PEDIATRIC_ALL_THERAPY_RESPONSE_UP_Up	1	1	1	1	1	1.31625	1.27054	1.51644	1	1	1	1.03135	1.90277	1.41377	1.62112	1	1.11255	1.32864	1	1.56471	1.41671	1.77152	1	1	1	1	1	1	1.06211	1	1	1.2818	1	1.08155	1.67995	1	1	1	1	1.22276	1.31186	1.33721	1	1.25117	1.10509	1	1
FONTAINE_FOLLICULAR_THYROID_ADENOMA_DN_Down	1.37637	1.38774	1.46502	1	1	1	1	1.05706	1	1	1	1	1	1	1	1	1	1	1.07746	1	1	1	1	1	1	1	1	1	1	1.10048	1	1	1.11419	1	1	1	1	1	1	1	1.43779	1.17147	1.45207	1	1	1	1.12319
FONTAINE_FOLLICULAR_THYROID_ADENOMA_DN_Up	1	1	1	1.10676	1	1.21886	1.63454	1	1	1.21745	1	1	1	1.02549	1	1.13331	1	1.17025	1	1.28022	1.10607	1.0227	1	1.13265	1.04582	1	1.38827	1.16086	1.331	1	1	1	1	1	1	1.10007	1.66087	1.52272	1	1.05564	1	1	1	1	1.45293	1.57375	1
FONTAINE_FOLLICULAR_THYROID_ADENOMA_UP_Down	1.20435	1	1.18987	1	1	1.52202	1	1	1	1	1	1	1	1	1	1	1	1	1	1	1	1	1	1.23254	1	1	1	1	1	1.14	1	1	1	1	1	1	1	1	1	1	1.37635	1.23618	1.21118	1	1	1	1.36772
FONTAINE_FOLLICULAR_THYROID_ADENOMA_UP_Up	1	1	1	1	1.25571	1	1.414	1	1	1.07939	1	1	1.24686	1	1.05641	1.03372	1	1.19349	1	1.6233	1.77416	1.41507	1	1	1.00806	1.08617	1.06295	1	1	1	1	1	1	1	1.00556	1	1.36216	1	1	1	1	1	1	1	1	1	1
FONTAINE_PAPILLARY_THYROID_CARCINOMA_DN_Down	1.50147	1.23955	1.19254	1	1	1	1	1	1	1	1	1	1.95238	1.20665	1.6625	1	1	1	1.13577	1	1	1	1.06431	1	1	1	1	1	1	1	1	1	1.31084	1	1	1	1	1	1	1	1.4118	1.38979	1.20283	1	1	1	1.1402
FONTAINE_PAPILLARY_THYROID_CARCINOMA_DN_Up	1	1	1	1.28132	1.49242	1	1.32791	1.01581	1	1.43505	1.2892	1	1	1	1	1.15968	1.08558	1.49788	1	1.42478	1.21423	1	1	1.08333	1	1	1	1	1	1	1	1	1	1	1	1	1.16358	1.81961	1.23656	1	1	1	1	1.26147	1.37927	1.04257	1
FONTAINE_PAPILLARY_THYROID_CARCINOMA_UP_Down	1.44421	1.35159	1.66625	1	1	1	1	1	1	1	1	1	1	1	1	1	1	1	1.73253	1	1	1	1	1.01285	1	1	1	1	1	1.18767	1	1	1.32219	1.17475	1.30911	1	1	1	1	1	1.43362	1.14483	1.64345	1	1	1	1.32947
FONTAINE_PAPILLARY_THYROID_CARCINOMA_UP_Up	1	1	1	1.0925	1.2982	1.02084	1.78741	1	1	1.63829	1	1.2526	1.1889	1	1.15554	1.27796	1	1.31485	1	1.815	1.26431	1.20559	1	1	1.42643	1.09003	1.57343	1.14274	1.37715	1	1.11005	1	1	1	1	1.04891	1.37385	1.61439	1	1.36729	1	1	1	1.0987	1.10176	1.52818	1
FONTAINE_THYROID_TUMOR_UNCERTAIN_MALIGNANCY_UP_Down	1.21631	1.38404	1.22905	1.32361	1	1.40131	1	1	1	1	1	1	1	1	1	1	1	1	1	1	1.16344	1	1	1.11928	1	1	1	1	1.17088	1.18398	1	1	1	1	1.01566	1	1	1	1	1	1	1	1.20458	1.19374	1	1	1
FONTAINE_THYROID_TUMOR_UNCERTAIN_MALIGNANCY_UP_Up	1	1	1	1	1	1	1	1	1	1.14216	1	1	1	1	1	1	1	1	1	1	1	1	1	1	1	1	1.30366	1.02113	1	1	1.2547	1	1	1	1	1.21627	1	1	1	1	1	1	1	1	1	1.04272	1
FORTSCHEGGER_PHF8_TARGETS_DN_Down	1	1	1.10217	1.23774	1	1	1	1	1	1	1	1	1.06499	1	1.16371	1	1	1	1.33193	1	1.11669	1.04225	1	1	1	1	1	1	1	1	1	1	1	1	1	1.03942	1	1	1	1	1.04084	1	1.10372	1	1	1	1
FORTSCHEGGER_PHF8_TARGETS_DN_Up	1	1	1	1	1	1	1.25158	1	1	1.04993	1	1	1	1	1	1	1	1	1	1.18992	1	1	1	1	1	1	1.06617	1	1	1	1	1	1	1	1	1	1.09215	1.12155	1.22201	1	1	1	1	1.32674	1.11734	1.04332	1.12112
FORTSCHEGGER_PHF8_TARGETS_UP_Down	1	1	1	1	1	1	1	1	1.09283	1.00534	1.39224	1	1.10529	1.00555	1.15154	1	1	1	1.2933	1	1	1	1	1	1	1	1	1	1	1.13021	1	1	1	1	1.17472	1	1	1.53362	1	1	1.1256	1	1	1	1	1	1
FORTSCHEGGER_PHF8_TARGETS_UP_Up	1.11368	1	1.16195	1.03033	1	1.016	1.26205	1	1	1	1	1	1	1	1	1.11929	1	1.53361	1	1.40544	1.14881	1.1155	1.67378	1.0274	1	1.07942	1	1.04037	1.29412	1	1.04023	1	1.06329	1	1	1	1.08324	1	1.33594	1.29871	1	1	1.14447	1.34859	1.04367	1	1.41095
FOSTER_KDM1A_TARGETS_DN_Down	1.12707	1.08604	1.40616	1.18209	1	1.27428	1	1	1	1	1	1.35761	1	1	1	1	1.13643	1	1	1	1	1	1	1.00768	1	1	1	1	1	1	1	1	1	1.04605	1	1	1	1.35082	1	1.4788	1	1	1.39856	1	1	1	1
FOSTER_KDM1A_TARGETS_DN_Up	1	1	1	1	1	1	1	1	1.05727	1.00534	1	1	1.40154	1	1.08028	1.07728	1	1	1	1	1	1.00108	1	1	1.03738	1	1	1	1	1	1	1	1	1	1	1	1	1	1.35685	1	1.26586	1	1	1	1	1	1
FOSTER_KDM1A_TARGETS_UP_Down	1.40632	1.09585	1.38616	1	1	1	1	1	1.33493	1	1.09362	1	1	1	1	1.19777	1	1	1.73343	1	1.32682	1	1.4318	1.4523	1.09154	1	1	1.12558	1	1.07587	1	1	1	1	1.47799	1.06952	1	1	1	1	1	1	1.37622	1	1	1	1
FOSTER_KDM1A_TARGETS_UP_Up	1	1	1	1.18776	1.43574	1.43675	1.3102	1	1	1.53184	1	1.19133	1.19077	1.6234	1.2549	1	1.317	1.40869	1	1.54308	1	1.1839	1	1	1	1.28639	1.40176	1	1.05777	1	1.3786	1.16544	1.40889	1	1	1	1	1.54771	1.81244	1.33375	1.03714	1.11906	1	1.17092	1.29732	1.59299	1.59776
FOSTER_TOLERANT_MACROPHAGE_DN_Down	1	1	1.07177	1.24473	1	1.62947	1	1.21982	1.47538	1	1	1	1.60746	1.34459	1.60914	1	1.17701	1	1.04249	1	1	1.31827	1	1	1	1	1.09741	1	1.04909	1.32545	1	1.00357	1	1.17786	1	1	1	1	1	1	1.96992	1.55435	1.0603	1	1	1	1.27593
FOSTER_TOLERANT_MACROPHAGE_DN_Up	1	1.01529	1	1	1	1	1.50933	1	1	1	1	1	1	1	1	1.39804	1	1.3785	1	1.24204	1.10928	1	1	1	1	1	1	1	1	1	1.05345	1	1.24929	1	1.16903	1.29072	1	1.50759	1	1	1	1	1	1.32674	1.06382	1.19447	1
FOSTER_TOLERANT_MACROPHAGE_UP_Down	1.26479	1.0695	1.37715	1	1	1.2566	1	1	1.63557	1	1	1	1.59294	1	1.30467	1	1	1	1.24243	1	1	1	1.22792	1	1.14522	1.16837	1	1	1	1.1792	1	1	1.28769	1	1	1	1	1	1	1	1.6689	1.02333	1.3863	1	1	1	1
FOSTER_TOLERANT_MACROPHAGE_UP_Up	1	1	1	1.48142	1.50882	1	1.46004	1.05705	1	1.11413	1	1.18974	1	1	1	1	1.41303	1.48472	1	1.80794	1.55962	1.13801	1	1	1	1	1	1	1	1	1.11023	1.2328	1	1	1	1.16477	1.41968	2.20866	1.83214	1	1	1	1	1.71829	1.2741	1.07688	1.3018
FOURNIER_ACINAR_DEVELOPMENT_EARLY_UP_Down	1	1	1	1	1	1	1	1	1	1	1	1	1	1	1	1	1	1	1.61716	1	1	1	1	1	1	1	1	1	1	1	1	1	1	1	1	1	1	1	1	1	1	1	1	1	1	1	1.59089
FOURNIER_ACINAR_DEVELOPMENT_EARLY_UP_Up	1	1	1	1	1	1	1	1	1	1	1	1	1	1	1	1	1	1	1	1.44597	1	1	1	1	1	1	1	1	1.25545	1	1	1	1	1	1	1	1	1	1	1	1	1	1	1.17801	1	1	1
FOURNIER_ACINAR_DEVELOPMENT_LATE_2_Down	1	1	1	1.90736	1	1.40125	1	1	1	1.55794	1.58958	1.49214	1	1	1	1	1	1	1	1	1	1	1	1	1	1.24188	1	1	1	1	1	1	1	1	1	1.28176	1	1.79779	1.30271	1	1	1	1	1	1	1	1
FOURNIER_ACINAR_DEVELOPMENT_LATE_2_Up	1.3324	1.32455	1.18382	1	1	1	1	1	1	1	1	1	1.48288	1	1.31073	1	1	1	1	1	1	1.26268	1	1	1.95415	1	1	1.0802	1.43607	1	1	1	1.10101	1	1	1	1	1	1	1	1	1	1.16629	1	1	1.09572	1
FOURNIER_ACINAR_DEVELOPMENT_LATE_DN_Down	1	1	1	1	1	1	1	1	1	1.6345	1	1	1	1	1	1	1	1	1	1	1	1	1	1	1	1	1	1	1	1	1	1	1	1	1	1	1	1	1	1	1	1	1	1	1	1	1
FRASOR_RESPONSE_TO_ESTRADIOL_DN_Down	1.31269	1	1.66885	1	1	1.38371	1	1	1.27384	1	1.2425	1	1.78953	1.03641	1.34449	1	1	1	1.31608	1	1	1.05815	1	1.58126	1	1.12945	1	1.31229	1.38508	1	1	1	1	1.15814	1	1	1	1	1	1.34609	1.66663	1.81085	1.68192	1	1	1	1.12784
FRASOR_RESPONSE_TO_ESTRADIOL_DN_Up	1	1	1	1	1.21695	1	1.71078	1.3704	1	1.45672	1	1.089	1	1	1	1	1.10837	1	1	1.04747	1	1	1	1	1	1	1	1	1	1	1.2038	1	1.09462	1	1.1635	1	1.0282	1.81207	1.35736	1	1	1	1	1.70547	1	1.07894	1
FRASOR_RESPONSE_TO_ESTRADIOL_UP_Down	1	1	1.26202	1.35325	1	1.1781	1	1.2943	1	1	1	1	1.60708	1.37163	1.65076	1.40263	1	1	1	1	1	1	1	1	1.05912	1	1	1	1	1.13686	1	1.28741	1	1	1.12719	1.69841	1.01225	1	1	1	1.29789	1.21112	1.23781	1	1	1	1.05886
FRASOR_RESPONSE_TO_ESTRADIOL_UP_Up	1	1.21757	1	1	1	1	1.19271	1	1.26801	1.15417	1	1.03464	1	1	1	1	1.16063	1.01531	1	1.3249	1.20335	1.28338	1	1	1	1	1.6727	1	1.59534	1	1	1	1.21841	1	1	1	1	1	1	1.25398	1	1	1	1.2588	1.39397	1.29688	1
FRASOR_RESPONSE_TO_SERM_OR_FULVESTRANT_DN_Down	1	1	1	2.04471	1.6334	1.97446	1	1	1	1.98474	1.53448	2.15638	1	1.11667	1	1.15362	1	1.00112	1	1	1	1	1	1	1	1	1	1	1	1	1.28146	1	1	1	1.21952	1.59743	1	2.35276	1.08258	1	1	1	1	1	1	1	1.10642
FRASOR_RESPONSE_TO_SERM_OR_FULVESTRANT_DN_Up	1.67238	1.39172	1.45073	1	1	1	1	1.42719	1.34271	1	1	1	1.72922	1	1.2803	1	1	1	1.19482	1	1.19211	1.10943	1	1	2.35614	1	1	1.35622	1.10788	1.45404	1	1	1.00391	1	1	1	1	1	1	1	1.16171	1	1.46055	1.00487	1.08505	1.25121	1
FRASOR_RESPONSE_TO_SERM_OR_FULVESTRANT_UP_Up	1	1	1	1	1	1	1	1	1	1	1	1	1	1	1	1	1	1	1	1	1	1	1	1	1	1	1	1	1	1	1	1	1	1	1	1	1	1	1	1	1	1	1	1	1.24489	1.01433	1
FRASOR_TAMOXIFEN_RESPONSE_UP_Down	1	1	1	1.04187	1	1.1388	1	1	1	1	1	1.10611	1.2456	1.02282	1.11409	1	1	1	1.14892	1	1	1	1	1.33422	1	1	1.08762	1	1	1.22961	1	1	1	1.25499	1	1	1	1	1	1	1	1	1	1	1	1	2.04509
FRASOR_TAMOXIFEN_RESPONSE_UP_Up	1.01808	1.11888	1	1	1	1	1.42594	1	1	1.08296	1	1	1	1	1	1.18489	1	1.46613	1	1.38477	1.10885	1	1.01253	1	1	1	1	1	1	1	1.29297	1	1.24129	1	1	1	1	1	1	1.3691	1	1.03544	1	1.18757	1.26737	1	1
FRIDMAN_IMMORTALIZATION_DN_Down	1	1	1.42083	1	1	1.20263	1	1	1	1	1	1	1.11043	1	1	1	1	1	1	1	1	1	1.04178	1	1	1	1	1	1	1.05447	1.03804	1.48571	1	1	1.80113	1.00424	1	1	1	1	1.5061	1	1.4486	1	1	1.41266	1
FRIDMAN_IMMORTALIZATION_DN_Up	1	1.35182	1	1.37885	1.08214	1	1.77038	1.38821	1	1.90949	1.28024	1.93775	1	1	1	1.00503	1.41515	1.4286	1.08548	1.79929	1.7831	1.60345	1	1	1.15144	1	1.04768	1	1	1	1	1	1	1	1	1	1	1	1	1	1	1	1	1.99131	1.53597	1	1
FRIDMAN_SENESCENCE_UP_Down	1.22121	1	1.59308	1	1	1.04343	1	1	1	1	1.14091	1	1	1	1	1	1	1	1.05899	1	1	1	1.0326	1.10416	1	1	1	1	1	1.25445	1	1.31969	1	1	1.86056	1.22345	1.10597	1	1	1	1.43038	1	1.59136	1	1	1.81433	1
FRIDMAN_SENESCENCE_UP_Up	1	1	1	1.01879	1	1	1.83225	1.7262	1.09991	1.65338	1	1.14352	1.05375	1.20986	1.16974	1.74164	1	1.80924	1	1.94521	1.88474	2.03608	1	1	1.14265	1	1.1965	1	1	1	1.62836	1	1.00789	1	1	1	1	1.49857	1.51678	1.22766	1	1	1	2.05685	1.30101	1	1.22712
FUJII_YBX1_TARGETS_DN_Down	1	1	1	2.56745	2.30256	2.08216	1	1	1	2.03875	1.71597	2.05018	1	1.11162	1	1	1	1	1	1	1	1	1	1	1	1.4098	1.0766	1	1	1	1	1	1	1	1	1.76643	1	2.17356	1.74718	1	1	1	1	1	1	1	1
FUJII_YBX1_TARGETS_DN_Up	1.02439	1	1.20827	1	1	1	1	1	1.0194	1	1	1	1.01093	1	1	1	1	1	1	1.08663	1	1	1	1.27562	2.17349	1	1	1.16604	1.45591	1.13273	1	1	1.29068	1.01056	1	1	1	1	1	1	1	1	1.20364	1	1	1.52003	1
FUJII_YBX1_TARGETS_UP_Down	1	1.03359	1	1	1	1	1	1	1.07493	1	1	1	1	1	1	1	1	1	1.2757	1	1	1	1	1	1	1.28802	1	1	1	1.64534	1	1	1	1	1.22949	1	1	1	1	1	1.54726	1.22731	1	1	1	1	1.38116
FUJII_YBX1_TARGETS_UP_Up	1	1	1	1	1	1	1.75275	1	1	1.45475	1.08269	1.28996	1	1.00054	1	1.05547	1.17712	1.63062	1	1.42663	1	1.13642	1	1.22987	1.61249	1	1.44551	1.23847	1	1	1	1	1	1.17847	1	1	1.18845	1	1	1	1	1	1	1.59059	1.49755	1.13255	1
FULCHER_INFLAMMATORY_RESPONSE_LECTIN_VS_LPS_DN_Down	1.27643	1.16737	1.24355	1.32542	1	1.49991	1	1	1.83433	1	1.35528	1	1.26813	1	1	1	1	1	1.30378	1	1	1	1.15964	1.04979	1	1.22314	1	1.11303	1	1.04035	1	1	1	1	1	1	1	1	1	1	2.03453	1.51823	1.24106	1	1	1	1.18584
FULCHER_INFLAMMATORY_RESPONSE_LECTIN_VS_LPS_DN_Up	1	1	1	1	1.18231	1	1.60515	1.10219	1	1.13033	1	1.05138	1	1.182	1	1.30751	1.0062	1.41398	1	1.58691	1.37622	1.16616	1	1	1	1	1.07691	1	1	1	1.10286	1.29153	1.21787	1.22217	1	1	1.12372	1.75222	1.07497	1.04784	1	1	1	1.64884	1.40441	1.3009	1
FULCHER_INFLAMMATORY_RESPONSE_LECTIN_VS_LPS_UP_Down	1	1	1.28195	1	1	1	1	1	1	1	1	1	1	1	1	1	1	1	1.01203	1	1	1	1	1.13506	1	1	1	1	1	1	1	1.06198	1.0038	1.18081	1.10443	1	1	1	1	1	1	1	1.2847	1	1	1	1.04581
FULCHER_INFLAMMATORY_RESPONSE_LECTIN_VS_LPS_UP_Up	1	1.13976	1	1.05567	1.06381	1	1.36876	1.44675	1	1.65332	1	1.21316	1.25932	1	1.08924	1.06699	1.03542	1.36489	1	1.25863	1.25789	1.24278	1	1	1	1	1.18564	1	1	1	1.29453	1	1	1	1	1	1	1.66296	1.20073	1	1	1.00969	1	1.48885	1.11235	1.14469	1
FURUKAWA_DUSP6_TARGETS_PCI35_DN_Down	1	1	1	2.50353	1.71383	2.13878	1	1	1	2.43646	2.23047	1.84499	1	1.87634	1	1.04353	1.22236	1.10805	1	1.16754	1.07554	1.0353	1	1	1	1	1	1	1	1	1	1.18477	1	1.24244	1.30749	1.83056	1	1.57824	1.60836	1	1.10685	1.1325	1	1	1	1	1
FURUKAWA_DUSP6_TARGETS_PCI35_DN_Up	1.05835	1	1.13344	1	1	1	1	1	1	1	1	1	1.35373	1	1	1	1	1	1	1	1	1	1	1.08824	2.31465	1	1	1.36485	1.14503	1.03546	1	1	2.02347	1	1	1	1	1	1	1	1	1	1.14103	1	1	1.80779	1
FURUKAWA_DUSP6_TARGETS_PCI35_UP_Down	1.0816	1	1.28598	1	1	1.61318	1	1	1	1	1.80789	1.5188	1	1	1	1	1	1	1.23692	1	1	1	1.29749	1.35463	1	1	1	1	1	1	1	1.43963	1.11209	1	1.24933	1.35086	1.01786	1	1.02019	1	2.03597	1.78825	1.3073	1	1	1.01229	1.17589
FURUKAWA_DUSP6_TARGETS_PCI35_UP_Up	1	1	1	1	1.18624	1	1.72061	1.07186	1	1	1	1	1	1.47677	1.2393	1.17138	1.28446	1.50804	1	1.71148	1.45608	1.6331	1	1	1	1.16086	1.42483	1.07972	1.40806	1	1.0795	1	1	1	1	1	1	1.10635	1	1	1	1	1	1.00155	1	1	1
GABRIELY_MIR21_TARGETS_Down	1	1.38531	1	1.78522	1	1.08984	1	2.55836	1.6784	2.416	1.4884	1.93488	3.24206	2.76101	3.07192	1	1	1	1	1	1	2.74108	1	1	1.13087	1	1.44123	1	1	1.73181	1	1	1.52029	1	1	1	1	1	1	1	2.28201	1.70918	1	1	1	1	1.42835
GABRIELY_MIR21_TARGETS_Up	1	1	1.59468	1	1	1	1	1	1	1	1	1	1	1	1	1	1	1	1	1	1	1	1	1.0936	1	1	1	1	1	1	1	1.25239	1	1	1.96338	1.79803	1.32285	1	1	1.02412	1	1	1.59303	1.00309	1.10146	1.06491	1
GAJATE_RESPONSE_TO_TRABECTEDIN_UP_Down	1.47092	1	1.47837	1	1	1	1	1	1.49261	1	1	1.05691	1	1	1	1	1	1	1.45961	1	1	1	1.60542	1.68134	1	1.5847	1	1.12341	1	1	1	1	1	1	1.40919	1.3406	1	1	1	1	1.64595	1.43693	1.47008	1	1	1	1.47076
GAJATE_RESPONSE_TO_TRABECTEDIN_UP_Up	1	1	1	1.26988	1.35848	1	1.82166	1.4425	1	1.35187	1.07583	1	1.16128	1.59362	1.32834	1.68208	1	1.93374	1	1.78105	1.2613	1.79088	1	1	1.07644	1	1.03348	1	1.25597	1	1.7704	1	1.49853	1	1	1	1.17424	1.47212	1.48482	1	1	1	1	1.82545	1.43178	1	1
GAL_LEUKEMIC_STEM_CELL_DN_Down	1	1	1	1.38631	1	1.76494	1	1	1	1.47018	1.31203	1.52924	1	1	1	1	1	1	1.48123	1	1	1	1.25834	1.02082	1	1.56524	1	1	1	1	1.0372	1	1	1.32019	1.69731	1.03151	1	1	1	1	1.26175	1	1	1	1	1	1
GAL_LEUKEMIC_STEM_CELL_DN_Up	1	1.04713	1	1	1.39956	1	1.27005	1.21382	1.26052	1	1	1	1.12034	1.25332	1.10081	1.25117	1.20912	1.59549	1	1.50873	1.1629	1.33747	1	1	1.96931	1	1.20398	1	1.45418	1.40101	1	1.3504	1.71576	1	1	1	1.05631	1.6117	1.32598	1	1	1	1	1.15478	1.08623	1.03022	1
GAL_LEUKEMIC_STEM_CELL_UP_Down	1.2117	1.5308	1	1.12247	1	1.23298	1	1.67197	1.30156	1.33029	1.19381	1.10596	1.16515	1.0809	1.15069	1	1.23107	1	1	1	1	1.20413	1	1.03114	1	1.03693	1	1	1	1.64112	1	1	1.05695	1.32864	1	1	1	1.04695	1	1.15599	1.19023	1.2786	1	1	1	1	1.2816
GAL_LEUKEMIC_STEM_CELL_UP_Up	1	1	1	1	1	1	1.35747	1	1	1	1	1	1	1	1	1.22525	1	1	1	1.08708	1	1	1	1	1	1	1	1	1	1	1.26358	1	1	1	1.42372	1.3871	1	1	1	1	1	1	1	1	1	1	1
GALE_APL_WITH_FLT3_MUTATED_UP_Down	1	1	1	1.51999	1.09132	1.11949	1	1	1.25522	1.58177	1.11621	1.59599	1	1	1	1	1	1	1	1	1	1	1	1	1	1	1.84916	1	1	1.05084	1	1	1	1	1	1	1	1	1.2164	1.10673	1	1	1	1	1	1	1.06061
GALE_APL_WITH_FLT3_MUTATED_UP_Up	1	1	1	1	1	1	1	1	1	1	1	1	1	1	1	1	1	1	1	1	1	1	1	1.28662	1	1	1	1	1.11114	1	1	1	1.18222	1	1	1	1	1	1	1	1.10282	1	1	1	1	1	1
GALINDO_IMMUNE_RESPONSE_TO_ENTEROTOXIN_Down	1.53614	1.01993	1.93482	1	1	1.24899	1	1	1	1	1	1	1	1	1	1	1	1	1	1	1	1	1	1.33276	1	1	1	1	1.29618	1	1	1	1	1	1.76437	1	1	1	1	1	1.02107	1	1.94199	1	1	1	1
GALINDO_IMMUNE_RESPONSE_TO_ENTEROTOXIN_Up	1	1	1	2.12875	1.59684	1	1.58213	2.16634	1	1.94852	1.6017	1.59541	1.09923	1	1	1.40431	1	1.42309	1	1.50082	1.54224	1.31062	1	1	1.26323	1.52527	1.46991	1.19381	1	1	1.0063	1	1.44461	1	1	1	1.11568	2.2112	1.85945	1	1	1	1	1.628	1.1967	1	1.31309
GALLUZZI_PERMEABILIZE_MITOCHONDRIA_Down	1.21507	1.162	1.17113	1	1	1	1	1	1	1	1	1	1	1	1	1	1.09344	1	1.04822	1	1.03558	1	1	1.28616	1	1.09037	1	1	1	1	1	1	1	1.00874	1	1	1	1	1.11522	1	1	1	1.17942	1	1	1	1
GALLUZZI_PERMEABILIZE_MITOCHONDRIA_Up	1	1	1	1.06578	1	1	1	1	1.17814	1	1	1	1	1	1	1.20572	1	1	1	1	1	1	1	1	1	1	1	1	1	1	1	1	1.30964	1	1	1	1	1	1	1	1	1	1	1	1	1	1.16587
GALLUZZI_PREVENT_MITOCHONDIAL_PERMEABILIZATION_Down	1.48197	1.18563	1.4067	1	1	1	1	1	1	1	1	1	1	1	1	1	1	1	1	1	1	1	1	1	1	1	1	1	1	1	1	1	1	1	1	1	1	1	1	1	1	1	1.38589	1	1	1	1
GALLUZZI_PREVENT_MITOCHONDIAL_PERMEABILIZATION_Up	1	1	1	1	1	1	1	1	1	1	1	1	1.17035	1.05792	1.24969	1	1	1	1	1	1	1.04256	1	1	1	1.01075	1	1	1	1	1	1	1	1	1.01983	1	1	1	1	1.15991	1.0551	1.02302	1	1	1	1	1
GARCIA_TARGETS_OF_FLI1_AND_DAX1_DN_Down	1	1	1	1	1	1	1	1	1	1	1.20106	1.15389	1	1	1	1	1	1	1	1	1	1	1	1	1	1	1.06486	1	1	1	1	1	1	1	1	1.1055	1	1.4527	1.79305	1	1	1	1	1	1	1	1
GARCIA_TARGETS_OF_FLI1_AND_DAX1_DN_Up	1.75384	1.55436	1.58847	1	1	1	1	1.01315	1.53631	1	1	1	1.56001	1.39193	1.54911	1	1	1	1	1	1	1.30486	1	1.00829	1.88618	1	1	1.0131	1.05959	1.28317	1	1	1.00304	1	1	1	1	1	1	1	1.36784	1.28206	1.5853	1	1	1	1
GARCIA_TARGETS_OF_FLI1_AND_DAX1_UP_Down	1.66098	1.74218	1.34966	1.27963	1	1.55411	1	1.31542	1.32017	1.44698	1.22203	1.86868	1.18297	1	1.32711	1	1.01657	1	1.37239	1	1.33438	1.05508	1.3591	1.38602	1	1.36962	1	1.65337	1.0369	1.41531	1	1	1	1.21889	1	1	1.31798	1	1	1.19214	1.30676	1.35105	1.34857	1	1	1	1.24287
GARCIA_TARGETS_OF_FLI1_AND_DAX1_UP_Up	1	1	1	1	1	1	1	1	1	1	1	1	1	1	1	1.36126	1	1	1	1	1	1	1	1	1	1	1	1	1	1	1.62741	1	1.46055	1	1.0655	1.04117	1	1.02761	1.06917	1	1	1	1	1.57381	1.19972	1	1
GARGALOVIC_RESPONSE_TO_OXIDIZED_PHOSPHOLIPIDS_BLACK_UP_Down	1	1	1.0214	1.10455	1	1.12633	1	1	1.37623	1	1	1	1	1	1	1	1	1	1	1	1	1	1	1	1	1	1	1	1	1.00846	1	1	1.27174	1	1	1.28748	1	1	1	1	1	1	1.02934	1	1	1	1
GARGALOVIC_RESPONSE_TO_OXIDIZED_PHOSPHOLIPIDS_BLACK_UP_Up	1	1	1	1	1	1	1	1.26819	1	1	1	1.57311	1	1.20259	1	1.48674	1	1.47054	1	1.09102	1	1.29306	1	1.46275	1	1	1.00829	1	1	1	1	1	1	1	1	1	1.72837	1.45379	1	1	1	1	1	1.24189	1.16732	1.04593	1
GARGALOVIC_RESPONSE_TO_OXIDIZED_PHOSPHOLIPIDS_BLUE_DN_Down	1.24227	1.11641	1.48378	1.08594	1	1.24263	1	1	1.21983	1	1.07181	1	1.17237	1	1	1	1	1	1.18332	1	1	1	1.12535	1	1	1	1.2514	1.17208	1	1.09917	1	1	1.66148	1	1	1	1	1.06313	1	1	1.18372	1.18053	1.48211	1	1.10725	1	1
GARGALOVIC_RESPONSE_TO_OXIDIZED_PHOSPHOLIPIDS_BLUE_DN_Up	1	1	1	1	1	1	1.45479	1	1	1	1	1	1	1	1	1	1	1.24358	1	1.18506	1	1	1	1	1	1	1	1	1	1	1	1	1	1	1.03701	1	1	1	1	1	1	1	1	1	1	1	1
GARGALOVIC_RESPONSE_TO_OXIDIZED_PHOSPHOLIPIDS_BLUE_UP_Down	1.11125	1.21593	1	1.0261	1	1.08412	1	1.00843	1	1	1.25045	1	1	1.65346	1.54449	1	1.00919	1	1	1	1	1.41341	1	1	1	1	1	1	1.08052	1.15781	1.52146	1.01792	1.05019	1	1	1	1	1	1	1	1	1	1	1	1	1	1
GARGALOVIC_RESPONSE_TO_OXIDIZED_PHOSPHOLIPIDS_BLUE_UP_Up	1	1	1	1	1	1	1	1	1.0583	1	1	1.52976	1	1	1	1	1	1	1	1	1	1	1	1	1	1.42609	1	1	1	1	1	1	1	1.02249	1	1	1.35752	1.72799	1	1	1	1	1	1	1	1	1.26832
GARGALOVIC_RESPONSE_TO_OXIDIZED_PHOSPHOLIPIDS_GREEN_DN_Down	1	1	1	1.28187	1.19312	1.2655	1	1.2877	1	1.217	1.46983	1.25109	1.03735	1.74934	1.39751	1.3212	1	1	1	1	1	1.41332	1	1	1	1	1	1	1	1	1	1	1	1	1	1	1	1	1	1	1	1	1	1	1	1	1
GARGALOVIC_RESPONSE_TO_OXIDIZED_PHOSPHOLIPIDS_GREEN_DN_Up	1	1	1	1	1	1	1	1	1	1	1	1	1	1	1	1	1.39513	1	1	1	1	1	1	1.17616	1.32269	1	1	1	1	1	1	1	1	1	1	1	1	1	1	1	1	1	1	1	1	1.02071	1
GARGALOVIC_RESPONSE_TO_OXIDIZED_PHOSPHOLIPIDS_GREEN_UP_Down	1	1	1	1	1	1	1	1.45455	1	1.06513	1	1	1	1	1	1	1	1	1	1	1	1	1	1.10893	1	1.23671	1	1	1	1	1	1	1	1	1.12148	1	1	1	1	1	1	1	1	1	1	1	1
GARGALOVIC_RESPONSE_TO_OXIDIZED_PHOSPHOLIPIDS_GREEN_UP_Up	1	1	1	1	1	1	1.0416	1	1	1	1	1	1	1	1	1	1	1	1	1	1	1	1.25386	1	1.31817	1	1	1	1	1	1	1	1	1	1	1	1	1.21825	1	1	1	1	1	1	1	1	1
GARGALOVIC_RESPONSE_TO_OXIDIZED_PHOSPHOLIPIDS_GREY_DN_Down	1.24348	1.05698	1.26356	1	1	1.73911	1	1	1.07222	1.02499	1.54303	1.37058	1.40891	1.02225	1	1	1	1	1	1	1	1	1.01843	1.04149	1.08205	1.55062	1.6738	1.75052	1	1	1	1	1.16875	1	1	1	1	1	1	1	1.89706	1.67477	1.24411	1	1	1	1
GARGALOVIC_RESPONSE_TO_OXIDIZED_PHOSPHOLIPIDS_GREY_DN_Up	1	1	1	1	1	1	1.8174	1.09529	1	1	1	1	1	1	1	1.44496	1.31739	1.9691	1.00906	1.67805	1.83048	1.66232	1	1	1	1	1	1	1	1	1.16079	1.20998	1	1.01441	1.36787	1.46339	1	1	1	1	1	1	1	1.14383	1.02265	1	1
GARGALOVIC_RESPONSE_TO_OXIDIZED_PHOSPHOLIPIDS_MAGENTA_UP_Down	1	1.15119	1	1	1	1	1	1	1	1	1	1	1	1.45404	1.19869	1	1	1	1	1.26545	1	1.3684	1.26497	1	1	1	1	1	1.72169	1.39248	1.38859	1.44987	1	1	1	1.34658	1	1	1	1	1.26923	1.05986	1	1	1	1	1
GARGALOVIC_RESPONSE_TO_OXIDIZED_PHOSPHOLIPIDS_MAGENTA_UP_Up	1	1	1	1	1	1	1.19192	1	1	1.80074	1	1.65842	1	1	1	1.00176	1	1.01226	1	1	1	1	1	1	1.12865	1	1	1.38665	1	1	1	1	1	1	1	1	1	1.30855	1	1	1	1	1	1	1.03818	1	1
GARGALOVIC_RESPONSE_TO_OXIDIZED_PHOSPHOLIPIDS_TURQUOISE_DN_Down	1	1	1	1.69511	1.88574	1.76224	1	1	1	1.66931	1.63117	1.70401	1	1.22111	1	1	1	1	1	1.15192	1.33149	1	1	1	1	1.14233	1	1	1	1	1.3493	1	1	1	1	1	1	1.81424	1.42659	1.12744	1	1	1	1	1	1	1
GARGALOVIC_RESPONSE_TO_OXIDIZED_PHOSPHOLIPIDS_TURQUOISE_DN_Up	1	1.09341	1	1	1	1	1	1.16903	1.46448	1	1	1	1.69006	1	1	1	1	1.12558	1	1	1	1	1.05899	1.39441	2.22598	1	1.03605	1.78244	1.3593	1.05893	1	1	1.68377	1.36124	1	1	1	1	1	1	1.52743	1	1	1	1	1.10659	1
GARGALOVIC_RESPONSE_TO_OXIDIZED_PHOSPHOLIPIDS_TURQUOISE_UP_Down	1.47622	1.42821	1.34059	1	1	1.21146	1	1.20797	1.09204	1	1.13031	1	1.92777	1.95698	1.96357	1	1.08208	1	1	1	1	1.89987	1	1	1	1	1	1	1.18404	1.4929	1	1	1	1	1	1	1	1	1	1	1.41988	1	1.3421	1	1	1	1
GARGALOVIC_RESPONSE_TO_OXIDIZED_PHOSPHOLIPIDS_TURQUOISE_UP_Up	1	1	1	1	1	1	1.43454	1	1	1	1	1	1	1	1	1.12753	1	1	1	1	1	1	1.02371	1	1.02006	1	1	1	1	1	1	1	1	1	1	1.03155	1.30631	1.60592	1.13829	1	1	1	1	1.28947	1.16365	1	1.22306
GARGALOVIC_RESPONSE_TO_OXIDIZED_PHOSPHOLIPIDS_YELLOW_UP_Down	1	1	1	1	1	1.08535	1	1	1	1	1	1	1.94753	1.29546	1.79043	1	1.10368	1	1.15926	1	1	1.51166	1	1	1	1	1	1	1	1	1	1	1.54578	1	1	1	1	1	1.13969	1	1.34797	1.09368	1	1	1	1	1
GARGALOVIC_RESPONSE_TO_OXIDIZED_PHOSPHOLIPIDS_YELLOW_UP_Up	1	1	1.21782	1	1	1	1	1	1	1	1	1	1	1	1	1	1	1	1	1	1	1	1	1	1	1	1	1	1	1	1	1	1	1	1.0343	1	1.05976	1	1	1	1	1	1.20676	1.04995	1	1	1
GARY_CD5_TARGETS_DN_Down	1	1.05288	1	1.51854	1	1	1	1	1.29898	1.23422	1.731	1	1	1	1	1	1	1	1	1	1	1	1	1	1	1	1.62114	1	1	1	1	1	1	1	1	1.02512	1	1.47227	1.76652	1	1	1	1	1	1	1	1
GARY_CD5_TARGETS_DN_Up	1	1	1	1	1	1	1	1	1	1	1	1	1.38353	1	1.04868	1	1	1	1	1	1	1	1.12668	1	1.05548	1	1	1	1.1834	1.09447	1	1	1	1.16947	1	1	1	1	1	1	1	1	1	1	1	1.01497	1
GARY_CD5_TARGETS_UP_Down	1.14835	1	1.2532	1.05766	1	1.12679	1	1	1	1	1	1	1	1	1	1	1	1	1	1	1	1	1	1	1	1	1	1	1	1.06414	1	1	1	1	1	1	1	1.05255	1	1.21592	1	1	1.24886	1	1	1	1
GARY_CD5_TARGETS_UP_Up	1	1	1	1	1	1	1	1.17548	1	1.01768	1	1	1	1	1	1	1	1	1	1	1	1	1	1	1	1	1	1	1	1	1	1	1	1	1	1	1	1	1.62581	1	1	1	1	1.32705	1	1	1
GAURNIER_PSMD4_TARGETS_Up	1	1	1	1	1	1	1	1	1	1	1	1	1	1	1	1	1	1	1	1	1	1	1	1	1	1	1	1	1	1	1	1	1	1	1	1	1	1.65509	1	1	1	1	1	1	1	1	1
GAUSSMANN_MLL_AF4_FUSION_TARGETS_A_DN_Down	1.17967	1.17824	1.07435	1	1	1	1	1	1	1	1	1	1.55365	1	1.37761	1	1.19921	1	1.25007	1	1	1.02737	1	1.41787	1	1	1	1	1	1.24223	1	1	1	1.27376	1	1	1	1	1	1	1.75415	1.35106	1.08653	1	1	1	1.05036
GAUSSMANN_MLL_AF4_FUSION_TARGETS_A_DN_Up	1	1	1	1.49197	1.39515	1	1.61505	1	1.00252	1.2523	1.09322	1	1	1	1	1.18684	1	1	1	1.31979	1	1	1	1	1	1	1.27851	1	1	1	1	1	1.03809	1	1.44862	1.0888	1	1.17331	1.73071	1.25977	1	1	1	1.1398	1.06888	1.20106	1
GAUSSMANN_MLL_AF4_FUSION_TARGETS_A_UP_Down	1.04192	1.1767	1	1.19478	1	1	1	1.48144	1.52644	1.31651	1.43788	1.2303	1.90227	1.33196	1.3565	1	1	1	1	1	1	1.29509	1	1.02193	1	1.00682	1.08756	1	1	1.22092	1	1.08008	1.25041	1.02182	1	1	1	1	1	1.01283	1.98516	1.40155	1	1	1	1	1.26973
GAUSSMANN_MLL_AF4_FUSION_TARGETS_A_UP_Up	1	1	1	1	1	1	1.33364	1	1	1	1	1	1	1	1	1	1	1.03893	1	1.18275	1.00824	1	1	1	1	1	1	1	1	1	1.00809	1	1	1	1	1	1.47839	1	1	1	1	1	1	1.28534	1.13933	1.00361	1
GAUSSMANN_MLL_AF4_FUSION_TARGETS_B_UP_Down	1	1	1	1	1	1	1	1	1	1	1	1	1	1	1	1	1	1	1	1	1	1	1	1	1	1	1	1.0871	1	1	1	1	1	1	1	1	1	1	1	1	1	1.43148	1	1	1	1	1
GAUSSMANN_MLL_AF4_FUSION_TARGETS_B_UP_Up	1	1	1	1	1	1	1	1	1	1	1	1	1	1	1	1	1	1	1	1	1	1	1	1	1	1	1	1	1.70804	1	1	1	1	1	1	1	1	1	1	1	1	1	1	1	1	1	1
GAUSSMANN_MLL_AF4_FUSION_TARGETS_C_UP_Down	1	1	1	1.26231	1	1.53832	1	1.35883	1.42387	1.25458	1.33785	1.414	1.30016	1.08784	1.33307	1	1.15073	1	1.07432	1	1	1.04266	1	1	1.06131	1	1.23036	1	1	1.63449	1	1	1.02823	1	1	1	1	1	1	1	1.32702	1.1189	1	1	1	1	1.24326
GAUSSMANN_MLL_AF4_FUSION_TARGETS_C_UP_Up	1	1	1	1	1	1	1.27945	1	1	1	1	1	1	1	1	1.44694	1	1.28322	1	1.31322	1	1	1	1	1	1	1	1	1	1	1.20449	1	1	1.03884	1.20387	1	1	1.06603	1	1	1	1	1	1.30988	1.01197	1	1
GAUSSMANN_MLL_AF4_FUSION_TARGETS_D_UP_Down	1	1	1	1	1	1	1	1	1	1	1	1	1.35211	1	1	1	1	1	1.44792	1	1	1	1.27733	1	1.73979	1	1	1	1	1.32486	1	1	1.47563	1	1	1.40674	1	1	1	1	1	1	1	1	1	1	1
GAUSSMANN_MLL_AF4_FUSION_TARGETS_D_UP_Up	1	1	1	1	1	1	1.4912	1.05076	1	1.25822	1.28201	1.48241	1	1.20375	1	1	1.32903	1.21388	1	1.81262	1.42146	1.46773	1	1.08524	1	1.62849	1.39498	1.35711	1.56448	1	1.60104	1	1	1	1.00132	1	1.75344	1	1	1.52031	1	1.12828	1	1.39629	1.25466	1	1
GAUSSMANN_MLL_AF4_FUSION_TARGETS_E_DN_Up	1	1	1	1	1.34412	1	1	1	1	1	1	1	1	1	1	1	1	1	1	1	1	1	1	1	1	1	1	1	1	1	1	1	1	1	1	1	1	1	1	1	1	1	1	1	1	1	1
GAUSSMANN_MLL_AF4_FUSION_TARGETS_E_UP_Down	1.58892	1.30345	1.5114	1	1	1	1	1	1.57672	1	1	1	1.07982	1	1	1.14983	1	1	1.44106	1	1	1	1	1.4824	1	1.05138	1	1.04529	1	1	1	1.20072	1	1.21895	1.72325	1.50529	1	1	1	1	1.42687	1	1.51552	1	1	1	1.63277
GAUSSMANN_MLL_AF4_FUSION_TARGETS_E_UP_Up	1	1	1	1.45545	1.59156	1.14386	1.96621	1.61509	1	1.73588	1.01676	1.43483	1	1.64887	1.20111	1	1.50678	1.42197	1	1.92798	1.54361	1.67076	1	1	1	1	1.52316	1	1	1	1.59697	1	1.35815	1	1	1	1	1.99174	1	2.00754	1	1.34777	1	2.0277	1.69801	1.0708	1
GAUSSMANN_MLL_AF4_FUSION_TARGETS_F_DN_Down	1	1	1	1	1	1	1	1	1.27697	1	1	1	1	1	1	1.35395	1	1.16216	1.42039	1	1.07493	1	1.28087	1	1	1.09831	1.34001	1.09941	1	1	1	1.31451	1	1	1	1	1.05741	1	1	1	1	1	1	1	1	1	1
GAUSSMANN_MLL_AF4_FUSION_TARGETS_F_DN_Up	1	1	1	1	1.06653	1	1.28082	1.22833	1	1.33701	1	1.21445	1	1.17878	1	1	1	1	1	1	1	1	1	1.32932	1	1	1	1	1	1.66366	1	1	1	1	1	1	1	1	1	1	1	1	1	1.23079	1	1.11926	1
GAUSSMANN_MLL_AF4_FUSION_TARGETS_F_UP_Down	1.44708	1.29777	1.43104	1	1	1.29651	1	1	1.54484	1	1.13241	1.01625	1.82515	1	1.28227	1	1	1	1.45148	1	1	1	1.29485	1.53105	1.04481	1.35088	1	1.08145	1	1.13282	1	1.07938	1	1	1.63937	1	1	1	1	1	1.64837	1.16037	1.43323	1	1	1	1.55582
GAUSSMANN_MLL_AF4_FUSION_TARGETS_F_UP_Up	1	1	1	1	1.33824	1	1.93809	1.30571	1	1.32795	1	1	1	1.1174	1	1.49481	1.11741	1.7943	1	1.92165	1.51192	1.12007	1	1	1	1	1.67084	1	1.18769	1	1.91963	1	1.20231	1.05528	1	1.18234	1	1.90857	1.16102	1.28409	1	1	1	1.97759	1.79499	1.40852	1
GAUSSMANN_MLL_AF4_FUSION_TARGETS_G_DN_Down	1.70181	1.77948	1.43952	1.18236	1	1.2021	1	1.01965	1	1	1.08678	1	1.28968	1	1.31388	1	1	1	1	1	1	1.11491	1.0269	1.40778	1.06957	1	1.04238	1	1	1.22406	1	1.168	1.12328	1	1	1.34045	1	1	1	1	1	1	1.44608	1	1	1	1
GAUSSMANN_MLL_AF4_FUSION_TARGETS_G_DN_Up	1	1	1	1	1.08877	1	1	1	1	1	1	1	1	1	1	1	1	1	1	1.01473	1.09164	1	1	1	1	1.28817	1	1	1	1	1	1	1	1	1	1	1.2413	1	1	1	1	1.03176	1	1	1	1	1
GAUSSMANN_MLL_AF4_FUSION_TARGETS_G_UP_Down	1.32621	1.4576	1.21589	1	1	1	1	1.13658	1.08213	1	1	1.22674	1.20225	1	1.1903	1	1	1	1.06738	1	1	1	1	1.0047	1	1.38896	1	1	1	1.43979	1	1	1	1.19437	1.27306	1.08824	1	1	1	1	1.57335	1	1.21092	1	1	1	1.27611
GAUSSMANN_MLL_AF4_FUSION_TARGETS_G_UP_Up	1	1	1	1	1.11016	1	1.00256	1	1	1.01761	1.75877	1	1	1.07323	1	1.27502	1.13294	1.44613	1	1.49742	1.43408	1.1917	1	1	1	1	1.03845	1	1.18791	1	1.27187	1	1	1	1	1	1.12367	1.66648	1.7491	1.41874	1	1.27865	1	1.04263	1.05732	1.27803	1
GAVIN_FOXP3_TARGETS_CLUSTER_P2_Down	1	1	1	1.45705	1	1.08169	1	1.00348	1.12597	1	1	1.19717	1.82045	1	1.46762	1	1	1	1.1398	1	1	1.02125	1.13383	1	1	1.05882	1.49609	1.53192	1.3512	1	1	1	1.06406	1.07838	1	1	1	1.38124	1	1	1.40831	1	1	1	1	1	1.23897
GAVIN_FOXP3_TARGETS_CLUSTER_P2_Up	1	1	1	1	1.02851	1	1.35193	1	1	1.11798	1.0562	1	1	1	1	1	1	1.57324	1	1.11375	1	1	1	1	1	1	1	1	1	1	1.08554	1	1	1	1.3513	1	1.12769	1	1	1.32102	1	1	1	1.27117	1.18722	1	1
GAVIN_FOXP3_TARGETS_CLUSTER_P3_Down	1.0598	1.1354	1	1	1	1.41719	1	1.30823	1	1	1	1	1.70608	1.10149	1.53688	1	1	1	1.07154	1	1	1	1.18899	1.42267	1	1	1	1	1	1.12011	1	1	1.02735	1	1	1	1	1	1	1	1.4429	1.09126	1	1	1	1	1.47271
GAVIN_FOXP3_TARGETS_CLUSTER_P3_Up	1	1	1	1.04533	1.27705	1	1.50381	1	1	1.6255	1.33421	1	1	1	1	1	1.11749	1.19014	1	1.2268	1.24596	1	1	1	1	1	1.2672	1	1	1	1.01853	1	1	1	1.14828	1.06254	1	1.40261	1	1	1	1	1	1.38168	1.31959	1.06213	1
GAVIN_FOXP3_TARGETS_CLUSTER_P4_Down	1	1	1.03008	1	1	1	1	1.32791	1	1	1.00367	1	1.44149	1	1.30699	1	1	1	1	1	1	1.10335	1	1	1.23599	1.29015	1	1.42829	1	1.29822	1	1	1	1.39152	1	1.43937	1	1	1	1.01313	1.39493	1.17997	1.0049	1	1	1	1.22225
GAVIN_FOXP3_TARGETS_CLUSTER_P4_Up	1.26265	1.53849	1	1.22893	1.4108	1.30991	1.55282	1	1	1.33308	1	1.20839	1	1	1	1.15046	1	1.27723	1	1	1	1	1	1	1	1	1	1	1	1	1.54462	1	1	1	1	1	1.00991	1.44055	1.0319	1	1	1	1	1.3394	1.34922	1.4525	1
GAVIN_FOXP3_TARGETS_CLUSTER_P6_Down	1	1	1	2.60251	1.34544	1.91459	1	1	1	2.2194	1.99722	2.03618	1	1.71292	1	1.34994	1	1.55103	1.4997	1.08783	1.53648	1	1	1	1	1.37492	1.05691	1	1	1	1	1	1	1.28097	1.05392	1.30333	1	1.78468	1.14511	1.33671	1.52242	1.42518	1	1	1	1	1
GAVIN_FOXP3_TARGETS_CLUSTER_P6_Up	1.58103	1.45076	1.3812	1	1	1	1	1.86194	1.6201	1	1	1	1.69964	1	1.09603	1	1	1	1	1	1	1.02376	1	1	2.36579	1	1	1.24383	1.18497	1	1	1	1.43199	1	1	1	1.5268	1	1	1	1	1	1.3849	1	1	1.55968	1.25244
GAVIN_FOXP3_TARGETS_CLUSTER_P7_Down	1.00754	1	1	1.04612	1	1.07266	1	1.24131	1.24723	1	1.22482	1	1.64711	1	1.38539	1	1	1	1	1	1	1	1	1	1.21222	1.18563	1	1	1	1.55139	1	1	1	1	1.23617	1	1	1	1.58032	1	1.95567	1.60003	1	1	1.00878	1	1
GAVIN_FOXP3_TARGETS_CLUSTER_P7_Up	1	1	1	1	1.1826	1	1.38629	1	1	1	1	1	1	1	1	1.15955	1	1.30518	1	1.72776	1.78084	1.14754	1	1	1	1	1.17443	1	1	1	1.57411	1.57473	1.1075	1	1	1.28949	1.4009	1.94719	1	1.09458	1	1	1	1	1	1	1.00955
GAVIN_FOXP3_TARGETS_CLUSTER_T4_Down	1	1	1	1	1	1	1	1	1	1	1	1	1.14331	1	1.10092	1	1	1	1.20967	1	1	1	1	1	1	1	1	1	1	1.09088	1	1	1	1	1	1	1	1	1	1	1.46385	1.07946	1	1	1	1	1.05784
GAVIN_FOXP3_TARGETS_CLUSTER_T4_Up	1	1.19486	1	1	1	1	1.35162	1	1.01895	1.3292	1	1	1	1	1	1.10693	1	1.09161	1	1.25765	1	1	1	1.39349	1	1.26696	1.52349	1	1	1	1.18219	1.05189	1.01721	1	1	1	1	1.6571	1.16201	1.03461	1	1	1	1	1	1.14357	1
GAVIN_FOXP3_TARGETS_CLUSTER_T7_Down	1	1	1.25005	1	1	1	1	1	1	1	1	1.03857	1	1	1	1	1	1	1	1	1	1	1	1	1	1	1	1	1	1	1	1	1	1	1	1	1	1.0671	1	1	1	1	1.2502	1	1	1.00886	1
GAVIN_FOXP3_TARGETS_CLUSTER_T7_Up	1	1	1	1	1	1.13076	1.06596	1.20998	1.30273	1	1	1	1.77184	1.55417	1.84269	1	1	1	1	1	1	1.68224	1	1	1.04666	1	1.05279	1	1	1.09672	1	1	1	1.15605	1	1	1.04207	1	1	1	1	1	1	1	1	1	1
GAZDA_DIAMOND_BLACKFAN_ANEMIA_ERYTHROID_DN_Down	1.14274	1.05191	1.21032	1	1	1	1	1	1	1	1	1	1	1	1	1	1	1	1.10192	1	1	1	1	1.06516	1	1	1	1	1	1.16042	1	1	1	1	1	1	1	1	1	1	1	1	1.20375	1	1	1	1.01573
GAZDA_DIAMOND_BLACKFAN_ANEMIA_ERYTHROID_DN_Up	1	1	1	1	1	1	1.13226	1	1.02359	1	1	1.07318	1.1947	1	1	1.05094	1	1	1	1.07763	1	1	1	1	1.12418	1	1	1	1	1	1	1	1	1	1	1.12291	1	1	1.17832	1	1	1.13412	1	1.082	1	1	1
GAZDA_DIAMOND_BLACKFAN_ANEMIA_ERYTHROID_UP_Down	1.44521	1.06631	1.38686	1	1	1	1	1	1	1	1	1	1	1	1	1	1	1	1	1	1	1	1	1	1	1	1	1	1	1	1	1	1	1	1	1	1	1	1	1	1	1	1.40111	1	1	1	1.00241
GAZDA_DIAMOND_BLACKFAN_ANEMIA_ERYTHROID_UP_Up	1	1	1	1	1	1	1	1	1	1	1	1	1	1	1	1	1	1	1	1	1	1	1	1	1	1	1	1	1	1	1	1	1	1	1	1	1	1	1	1	1	1	1	1	1	1	1
GAZDA_DIAMOND_BLACKFAN_ANEMIA_MYELOID_DN_Down	1.53963	1.18284	1.76208	1	1	1	1	1	1	1	1	1	1	1	1	1	1	1	1	1	1	1	1.27333	1.20613	1	1	1	1	1	1	1.22638	1	1	1	1	1	1	1	1.31598	1	1	1	1.76579	1	1	1	1
GAZDA_DIAMOND_BLACKFAN_ANEMIA_MYELOID_DN_Up	1	1	1	1	1	1.0345	1	1	1.29014	1.45103	1	1.62317	1.50313	1.3795	1.59135	1	1	1	1	1	1	1.19779	1	1	1	1	1	1	1	1	1	1	1	1.09941	1	1	1	1.18132	1	1	1.62755	1.48389	1	1	1	1	1
GAZDA_DIAMOND_BLACKFAN_ANEMIA_MYELOID_UP_Down	1	1	1.16182	1	1	1.34681	1	1	1.29787	1	1	1	1.56065	1.39039	1.57756	1	1.03513	1	1	1	1	1.3064	1	1	1	1	1	1	1	1.25721	1	1.1421	1.02969	1	1.11847	1.53864	1	1	1	1	1	1	1.16916	1	1	1	1
GAZDA_DIAMOND_BLACKFAN_ANEMIA_MYELOID_UP_Up	1	1	1	1	1.11465	1	1.28612	1	1	1	1	1	1	1	1	1	1	1.21088	1	1.13662	1	1	1	1.40485	1.45684	1.43948	1	1.53317	1	1	1	1	1	1.30164	1	1	1.03965	1.38893	1	1.02129	1	1.17856	1	1.01464	1	1	1.15321
GAZDA_DIAMOND_BLACKFAN_ANEMIA_PROGENITOR_DN_Down	1.06305	1.0659	1	1	1	1	1	1.07373	1.14995	1.27919	1.34308	1.15978	1	1	1	1	1	1	1	1	1	1	1	1	1	1	1	1	1	1.18764	1	1	1.10473	1.16694	1	1	1	1.29451	1	1	1	1	1	1	1	1	1
GAZDA_DIAMOND_BLACKFAN_ANEMIA_PROGENITOR_DN_Up	1	1	1	1	1	1	1	1	1	1	1	1	1	1.10004	1.16697	1.0072	1	1.04472	1	1	1	1	1.34186	1	1	1	1	1	1.14485	1	1	1	1	1	1.28199	1.13728	1	1	1	1.36397	1	1	1	1	1	1.0202	1
GAZDA_DIAMOND_BLACKFAN_ANEMIA_PROGENITOR_UP_Down	1	1.12126	1	1.29922	1	1	1	1.17362	1	1	1	1	1	1	1	1	1	1	1	1.1365	1.24906	1	1	1	1	1	1	1	1	1	1	1	1	1	1.11771	1	1	1	1	1	1	1	1	1	1	1	1
GAZDA_DIAMOND_BLACKFAN_ANEMIA_PROGENITOR_UP_Up	1	1	1	1	1	1	1	1	1	1.19356	1	1.42979	1.09977	1	1.06591	1	1	1	1	1	1	1	1	1.1916	1	1	1	1	1	1	1	1	1	1.11896	1	1	1	1.85196	1.64812	1	1	1	1	1	1	1	1.36586
GAZIN_EPIGENETIC_SILENCING_BY_KRAS_Down	1	1	1	1	1	1	1	1	1	1.08451	1.66956	1.6201	1.05157	1.35357	1	1.01415	1	1	1	1	1	1.38471	1	1	1	1	1	1	1	1	1	1	1.37883	1	1	1	1	1	1	1	1	1	1	1	1	1	1
GAZIN_EPIGENETIC_SILENCING_BY_KRAS_Up	1.21378	1	1.2547	1	1	1	1.22983	1	1.35215	1	1	1	1	1	1.08918	1	1.16067	1	1	1	1	1	1	1	1.10711	1.23346	1.23126	1	1	1	1	1.07361	1	1	1	1	1.48136	1	1	1	1	1	1.24021	1	1	1	1
GEISS_RESPONSE_TO_DSRNA_UP_Down	1	1	1	1	1	1	1	1	1.75828	1	1	1	1	1	1	1	1	1	1.13304	1	1	1	1	1.31129	1	1.17391	1	1	1	1	1	1	1	1	1.24262	1.19087	1	1	1	1	1.71894	1.51777	1	1	1	1	1
GEISS_RESPONSE_TO_DSRNA_UP_Up	1	1	1	1.05809	1.40081	1	1.67174	1.46601	1	1.05186	1	1.15685	1	1.27387	1.18563	1.29258	1	1.74332	1	1.52172	1.36516	1.57998	1	1	1.083	1	1.42847	1	1.25213	1.49841	1.58814	1	1	1.10582	1	1	1.7582	1.67615	1	1.26668	1	1	1	1.52042	1.30359	1.16008	2.04277
GENTILE_RESPONSE_CLUSTER_D3_Down	1	1	1	1.9766	1.62893	2.09662	1	1	1	1.04484	1.50889	1	1	1	1	1	1.56724	1.23391	1.2205	1	1	1	1	1	1	1.46539	1	1	1.20354	1.17955	1	1	1.06641	1	1	1	1	1.66063	1.48575	1	1.26965	1.02236	1	1	1	1	1
GENTILE_RESPONSE_CLUSTER_D3_Up	1	1	1.01598	1	1	1	1	1.18444	1	1	1	1	1	1	1	1	1	1	1	1.01001	1	1	1	1.13874	1.11939	1	1	1	1	1	1	1	1	1.11441	1	1	1.28959	1	1	1	1	1	1.03894	1	1	1	1.34018
GENTILE_UV_HIGH_DOSE_DN_Down	1.0163	1.00064	1.01115	1.67521	1	1.60897	1	1	1.47545	1.2062	1.69541	1	1.10793	1.52103	1.28064	1	1.00797	1	1	1	1	1.08793	1	1	1	1.18808	1	1	1.07087	1.40616	1	1.00694	1.11414	1	1	1.03173	1	1	1.05468	1	1.58263	1	1.00773	1	1	1	1
GENTILE_UV_HIGH_DOSE_DN_Up	1	1	1	1	1	1	1.35011	1	1	1	1	1	1	1	1	1	1	1	1	1.25975	1.25386	1	1	1.11857	1.28611	1	1	1	1	1	1	1	1	1.20167	1	1	1.44247	1	1	1.1008	1	1	1	1.53308	1.18248	1	1
GENTILE_UV_LOW_DOSE_DN_Down	1	1	1	1	1.01891	1	1	1.20884	1.11794	1.53585	1.37832	1.39739	2.04684	1.56878	1.88709	1.19938	1	1	1	1	1	1.41714	1	1	1	1	1	1	1.13139	1.8225	1	1.39697	1	1	1	1	1	1	1	1	1.92428	1.42116	1	1	1	1	1.27606
GENTILE_UV_LOW_DOSE_DN_Up	1.0603	1	1.40826	1	1	1	1.25419	1	1	1	1	1	1	1	1	1	1.42842	1	1	1.13022	1	1	1	1	1.15319	1	1.66265	1	1	1	1	1	1	1	1.01603	1	1	1	1.00171	1	1	1	1.39783	1.24779	1	1	1
GENTILE_UV_LOW_DOSE_UP_Down	1.75818	1.30824	2.01063	1	1	1.05637	1	1	1	1	1.27742	1	1	1	1	1	1	1	1	1	1	1	1	1	1	1	1	1	1	1	1	1.42721	1	1	1.58301	1	1	1	1	1	1.30718	1.00375	2.027	1	1.16892	1	1
GENTILE_UV_LOW_DOSE_UP_Up	1	1	1	1	1	1	1.3473	1	1.27237	1.15171	1	1	1.49608	1	1.09298	1	1	1	1	1.35898	1.07473	1.28214	1	1	1	1.10497	1	1.14562	1	1	1	1	1	1	1	1	1	1.658	1	1	1	1	1	1	1	1	1.71493
GENTILE_UV_RESPONSE_CLUSTER_D2_Down	1	1.01637	1	1.1214	1	1.13882	1	1.34434	1.87763	1.50706	1.64869	1.22756	1.3871	2.12475	1.92158	1	1	1	1	1	1	1.56966	1	1	1	1	1	1	1	1.77774	1.17075	1.1018	1	1	1	1.15247	1	1	1	1	1.43312	1	1	1	1	1	1.27978
GENTILE_UV_RESPONSE_CLUSTER_D2_Up	1	1	1	1	1	1	1.62542	1	1	1	1	1	1	1	1	1.19175	1	1.14642	1	1.18406	1.08299	1	1	1.06724	1	1	1	1	1	1	1	1	1	1	1	1	1.48305	1	1	1.18869	1	1	1	1.49903	1.5045	1	1
GENTILE_UV_RESPONSE_CLUSTER_D4_Down	1	1.03327	1	1.55573	1.06471	1.2529	1	1	1.56284	1.37329	1.26897	1	1.43383	1.51962	1.49562	1	1	1	1	1	1	1.02809	1	1	1	1.05069	1	1	1.1225	1	1	1	1	1	1	1	1	1	1.24074	1	1.78566	1.12438	1	1	1	1	1
GENTILE_UV_RESPONSE_CLUSTER_D4_Up	1	1	1	1	1	1	1	1	1	1	1	1	1	1	1	1	1	1.10576	1	1.34882	1.27217	1	1	1	1.31669	1	1	1	1	1	1	1.35074	1	1.03115	1	1	1.49358	1	1	1.34946	1	1	1	1.10574	1	1	1
GENTILE_UV_RESPONSE_CLUSTER_D5_Down	1.23558	1	1.29668	1.37117	1.08538	1.19547	1	1	1.04425	1	1.1329	1	1.01824	1.28566	1.25639	1	1	1	1	1	1	1.18421	1	1	1	1	1.22853	1	1.19575	1.03416	1	1.34483	1	1	1	1	1.02213	1	1.16023	1	1	1	1.31472	1	1	1	1.01536
GENTILE_UV_RESPONSE_CLUSTER_D5_Up	1	1	1	1	1	1	1	1	1	1	1	1	1	1	1	1	1	1	1	1	1	1	1	1	1.09169	1	1	1	1	1	1	1	1	1	1.08864	1	1	1	1	1	1	1	1	1	1.06353	1	1
GENTILE_UV_RESPONSE_CLUSTER_D6_Down	1	1	1	1.27186	1.57211	1	1	1	1	1	1.16196	1	1.2494	1	1.29728	1.03184	1	1.05339	1	1	1	1.24039	1	1	1	1	1	1	1	1.532	1	1	1.18068	1	1	1	1	1	1	1	1.61317	1	1	1	1	1	1.33123
GENTILE_UV_RESPONSE_CLUSTER_D6_Up	1	1	1.02115	1	1	1	1.63164	1	1	1	1	1	1	1	1	1	1.05052	1	1	1	1	1	1.22803	1.22495	1	1	1	1	1	1	1	1	1	1	1.04403	1.26232	1	1.059	1	1.04364	1	1	1	1.66964	1.43889	1	1
GENTILE_UV_RESPONSE_CLUSTER_D7_Down	1	1	1	1	1	1.27048	1	1	1.0593	1	1	1	1	1	1	1	1	1	1	1	1	1	1	1	1	1	1	1	1	1	1.15548	1	1	1	1	1	1	1	1.06707	1	1	1	1	1	1	1	1.28778
GENTILE_UV_RESPONSE_CLUSTER_D7_Up	1	1	1	1	1	1	1.47272	1.66383	1	1.0765	1	1.2358	1	1	1	1.04908	1	1	1	1.53451	1.29133	1	1.48058	1.13692	1.41096	1	1	1.18597	1	1	1	1	1	1.52701	1	1	1.71968	1	1	1.24293	1	1.09958	1	1.44497	1	1.18401	1
GENTILE_UV_RESPONSE_CLUSTER_D8_Down	1.24689	1	1.04561	1.44229	1.72622	1	1	1	1	1.11341	1	1.67966	1.84413	1.56118	1.72781	1	1	1	1	1	1	1.28451	1	1	1	1	1	1	1	1.09993	1	1	1	1	1	1	1	1	1	1	1.30854	1	1.03511	1	1	1	1.38472
GENTILE_UV_RESPONSE_CLUSTER_D8_Up	1	1	1	1	1	1	1.68441	1	1	1	1	1	1	1	1	1	1	1	1	1.43218	1.72708	1	1.27536	1.12335	1.39342	1.01144	1	1.3146	1	1	1	1.02937	1	1.18701	1	1.03081	1.5917	1	1.05457	1.66638	1	1.19274	1	1.22147	1.09428	1	1
GENTILE_UV_RESPONSE_CLUSTER_D9_Down	1	1	1	1	1	1.26123	1	1	1	1.19648	1	1.27869	2.01199	1.67959	1.94635	1.21716	1	1.20608	1	1	1	2.04599	1	1	1	1.27047	1	1	1	1	1	1	1	1	1	1	1	1.1837	1.36185	1	1	1	1	1.20269	1.48188	1	1.54816
GENTILE_UV_RESPONSE_CLUSTER_D9_Up	1	1	1	1	1	1	1	1	1	1	1	1	1	1	1	1	1	1	1	1	1	1	1.58809	1	1.23635	1	1	1	1	1	1	1.01402	1	1.60806	1	1	1.14948	1	1	1.0647	1	1	1	1	1	1	1
GENTLES_LEUKEMIC_STEM_CELL_UP_Down	1	1	1	1	1	1	1	1	1	1.35072	1.43869	1	1.30789	1	1	1	1	1	1	1	1	1.16308	1	1	1	1	1	1	1	1	1	1	1	1	1	1	1	1	1	1	1.24216	1	1	1	1	1	1
GENTLES_LEUKEMIC_STEM_CELL_UP_Up	1	1	1	1	1	1	1.59785	1	1	1	1	1	1	1	1	1	1.05695	1.14857	1.3545	1	1.08985	1	1	1	1	1	1	1	1	1	1	1	1	1	1	1	1	1	1	1	1	1	1	1	1	1	1
GEORGANTAS_HSC_MARKERS_Down	1.63863	1.55618	1.57167	1	1	1.45235	1	1	1.26744	1	1.7405	1	1	1	1	1	1	1	1.019	1	1	1	1	1	1	1	1	1.05549	1	1	1	1.21003	1.2773	1.11903	1.1212	1.03912	1	1	1	1.28033	1.69317	1.50484	1.57801	1	1	1	1.8721
GEORGANTAS_HSC_MARKERS_Up	1	1	1	1.86716	1.76805	1	2.04255	1	1	1.41411	1	1.79975	1.05033	1.27248	1.41959	1.28212	1	1.68214	1	1.69041	1.46157	1.73702	1	1.20265	1	1	1	1	1	1	1.49523	1	1	1	1	1	1.14571	1.48933	1	1	1	1	1	1.40859	1.37247	1.51183	1
GEORGES_CELL_CYCLE_MIR192_TARGETS_Down	1	1	1	2.2505	2.47013	1.66498	1	1.17306	1.24943	1.84114	1.61791	1.77842	1	1.67087	1.46827	1	1	1	1	1	1	1	1	1	1	1	1.04579	1	1	1.2311	1.37007	1	1	1	1	1.31865	1	1.76094	1.49684	1	1.27008	1	1	1	1	1	1.40696
GEORGES_CELL_CYCLE_MIR192_TARGETS_Up	1	1	1.45203	1	1	1	1	1	1	1	1	1	1	1	1	1	1.04483	1.08121	1	1	1	1	1.07249	1.16646	1.85808	1	1	1.47346	1.76503	1	1	1	1	1.2505	1	1	1.27824	1	1	1.02828	1	1	1.45081	1.35666	1.15119	1.27348	1
GEORGES_TARGETS_OF_MIR192_AND_MIR215_Down	1	1.11629	1	1.90745	1	1.58064	1	1.24343	1.01457	1.68639	1.28186	1.52779	1.62407	1.82552	1.93923	1	1	1	1	1	1	1.69054	1	1	1	1	1.04245	1	1	1.00653	1	1	1.04324	1	1	1.21959	1	1.2798	1	1	1.47142	1	1	1	1	1	1
GEORGES_TARGETS_OF_MIR192_AND_MIR215_Up	1.05304	1	1.77568	1	1	1	1	1	1	1	1	1	1	1	1	1	1	1	1	1	1	1	1.16305	1.20594	1.43266	1	1	1	1.05756	1	1	1.1299	1	1.3802	1.0986	1	1.32143	1	1	1.14397	1	1	1.75959	1	1	1.32367	1
GERHOLD_ADIPOGENESIS_DN_Down	1	1	1	1	1	1	1	1	1	1	1.27219	1.34921	1	1.09429	1.15624	1	1	1	1.1956	1	1	1	1.03419	1	1	1.42908	1	1	1	1.04399	1	1.32696	1.07657	1	1.51569	1.60998	1	1	1	1	1	1	1	1	1	1	1.41421
GERHOLD_ADIPOGENESIS_DN_Up	1.35753	1.50953	1	1	1.12219	1	1.80918	1.54796	1	1	1	1	1	1	1	1.60436	1	1.78016	1	1.91219	1.98524	1.24748	1	1	1.54751	1	1.18434	1	1.30602	1	1.98638	1	1	1.28324	1	1	1	1.34819	1.05674	1	1	1	1	2.02674	1.56752	1.3173	1
GERHOLD_ADIPOGENESIS_UP_Down	1.2592	1.29664	1.39486	1	1	1.38273	1	1	1	1	1	1	1	1	1	1	1.04337	1	1	1	1	1	1.183	1.63893	1.31902	1	1	1.04884	1	1	1	1	1	1.41809	1	1	1	1	1	1	1	1	1.38915	1	1	1	1
GERHOLD_ADIPOGENESIS_UP_Up	1	1	1	1	1.07615	1	1.43638	1	1.07985	1.74233	1.20012	1.54311	1	1.62194	1.22798	1.54802	1	1.3094	1	1.09893	1	1.35865	1	1	1	1.23685	1.02039	1	1	1	1	1	1	1	1	1	1.01579	1	1.06546	1	1	1	1	1.53286	1.43671	1.07252	1
GERY_CEBP_TARGETS_Down	1.46616	1.21902	1.80329	1	1	1	1	1	1.47132	1	1	1	1	1	1	1.03865	1	1	1	1	1	1	1.46611	1	1	1.03231	1	1	1	1	1	1.47073	1.30837	1	2.01828	1.33291	1	1	1	1	1.07461	1	1.77342	1	1	1	1.54241
GERY_CEBP_TARGETS_Up	1	1	1	1.48144	1.27224	1	1.55896	1.59013	1	1.46037	1	2.08495	1	1.45256	1.09682	1	1.09439	1.14973	1.39937	1.52697	1.73566	1.2852	1	1	1.42039	1	1.58116	1	1	1	1.18011	1	1	1.16794	1	1	1.08032	1.77476	1.8133	1.30384	1	1.13022	1	1.8704	1.44077	1.02497	1
GESERICK_TERT_TARGETS_DN_Down	1	1	1	1	1	1	1	1	1	1	1	1	1	1	1	1	1	1	1	1	1	1	1	1	1	1	1	1	1.44871	1	1	1	1	1	1	1	1	1	1	1	1	1	1	1	1	1	1
GESERICK_TERT_TARGETS_DN_Up	1	1	1	2.06396	1.58297	1	1	1	1	2.00825	1.40808	1.86662	1	1	1	1.17331	1	1.27244	1.36701	1.65723	1.62737	1	1	1	1	1	1	1.41851	1	1	1	1	1	1	1	1	1	1	1	1	1	1	1	1	1	1	1
GHANDHI_BYSTANDER_IRRADIATION_UP_Down	1.45415	1.43583	1.61063	1	1	1.01335	1	1	1	1	1	1	1.2128	1.12163	1	1	1	1	1	1	1	1	1	1	1	1	1.16829	1	1	1	1	1	1.21302	1	1	1	1	1	1	1	1.27787	1.25887	1.64188	1	1	1	1
GHANDHI_BYSTANDER_IRRADIATION_UP_Up	1	1	1	1.51416	1.58092	1	1.58529	1.15988	1	2.13528	1.54477	1.67954	1	1	1	1.16982	1	1.16428	1.33419	1.68752	1.75964	1.42253	1.28918	1.4939	1	1.26674	1	1.44908	1	1	1	1.03552	1	1	1.26978	1	1.68996	2.02578	1.98699	1	1	1	1	1.28629	1.33903	1.50831	2.13217
GHANDHI_DIRECT_IRRADIATION_DN_Down	1	1	1	1	1	1	1	1	1	1	1	1	1	1.25023	1	1	1	1	1.20412	1	1	1	1	1	1	1	1	1.43681	1.12182	1	1	1.09237	1	1	1	1.13128	1.38483	1	1	1	1.55133	1.19172	1	1.19265	1.46856	1.43012	1.55587
GHANDHI_DIRECT_IRRADIATION_DN_Up	1.36756	1.7127	1	1	1	1	1.21119	1.58397	1.22387	1	1	1	1	1	1	1.3571	1	1.61917	1	1	1	1.25849	1	1	1	1	1	1	1	1	1	1	1	1	1	1	1	1	1	1	1	1	1	1	1	1	1
GHANDHI_DIRECT_IRRADIATION_UP_Down	1.8964	1.45928	1.92589	1	1	1	1	1	1	1	1	1	1	1	1	1.05939	1	1	1	1	1	1	1.05798	1	1.00534	1	1.10553	1	1	1.29626	1.22064	1	1	1	1	1	1	1	1	1.00071	1.50791	1.27801	1.88497	1	1	1	1
GHANDHI_DIRECT_IRRADIATION_UP_Up	1	1	1	1.96879	1.64451	1.36167	1.60117	1	1	2.00967	1.41441	2.10425	1.06837	1	1	1	1.20569	1.27409	1	1.21481	1.13262	1.18207	1	1	1	1	1	1.11201	1	1	1	1.13332	1.08314	1.11374	1.27066	1	1.76803	1.88737	1.94541	1	1	1	1	1.30025	1.12924	1.20418	1.99711
GINESTIER_BREAST_CANCER_20Q13_AMPLIFICATION_DN_Down	1	1	1	1.87352	1	2.05128	1	1.71337	1.24142	1.95278	1.40854	1.87351	1	1.77242	1.46891	1	1	1	1	1	1	1.46208	1	1	1	1	1	1	1	1.51355	1	1	1	1	1	1	1	1.49062	1.05174	1.342	1	1.1122	1	1	1	1	1
GINESTIER_BREAST_CANCER_20Q13_AMPLIFICATION_DN_Up	1.15245	1	1.1124	1	1	1	1	1	1	1	1	1	1	1	1	1	1	1	1	1	1	1	1	1	1.62805	1	1	1	1	1	1	1	1	1.05725	1.05269	1.73426	1	1	1	1	1	1	1.07803	1	1	1	1
GINESTIER_BREAST_CANCER_20Q13_AMPLIFICATION_UP_Down	1	1.2338	1	1	1	1	1	1.15495	1	1.17423	1	1	1.42272	1	1.31717	1	1	1	1	1	1	1.14555	1	1	1.12072	1	1.27687	1	1	1.56668	1	1	1	1	1	1	1	1	1	1	1.1849	1	1	1	1	1	1.05364
GINESTIER_BREAST_CANCER_20Q13_AMPLIFICATION_UP_Up	1	1	1	1	1	1	1.1255	1	1	1	1	1	1	1	1	1	1	1	1.02881	1	1.21203	1	1	1	1	1	1	1	1.0961	1	1	1	1	1	1	1	1.30771	1	1.15582	1.22808	1	1	1	1	1	1	1
GINESTIER_BREAST_CANCER_ZNF217_AMPLIFIED_DN_Down	1	1	1	1.10391	1	1.72742	1	1.23075	1	1.68066	1	1.78521	1	1.73211	1	1	1.44497	1.52079	1	1	1	1.07	1	1.07582	1	1	1	1	1.07689	1.45077	1	1	1	1.31908	1	1	1	1.61352	1	1.7665	1	1	1	1	1.02515	2.22072	1
GINESTIER_BREAST_CANCER_ZNF217_AMPLIFIED_DN_Up	1.45559	1.66424	1	1	1	1	1	1	1	1	1	1	1	1	1	1	1	1	1	1	1	1	1	1	1.57749	1	1	1	1	1	1	1	1	1	1	1.35974	1	1	1	1	1.51801	1	1	1	1	1	1
GINESTIER_BREAST_CANCER_ZNF217_AMPLIFIED_UP_Down	1	1	1	1.44023	1.635	1	1	1.22034	1.32806	1.38329	1.21078	1.07572	1.61527	1.34753	1.58205	1	1	1	1	1	1	1.45478	1	1	1	1	1.53189	1	1	1.16082	1	1	1	1	1	1	1	1	1	1	1.73562	1.16721	1	1	1	1	1.301
GINESTIER_BREAST_CANCER_ZNF217_AMPLIFIED_UP_Up	1	1	1	1	1	1	1	1	1	1	1	1	1	1	1	1	1	1	1.2458	1	1.05801	1	1	1	1	1	1	1	1.18303	1	1	1.10712	1	1.08818	1.33833	1	1.26849	1	1	1.02286	1	1	1	1	1	1	1
GNATENKO_PLATELET_SIGNATURE_Down	1.20144	1.01498	1.36785	1.09686	1	1	1	1	1	1	1	1	1	1	1	1.09816	1	1	1	1	1	1	1.27756	1.09562	1	1	1	1	1	1	1	1	1	1	1	1	1.46773	1	1	1.63211	1	1.40556	1.37615	1	1	1.12558	1
GNATENKO_PLATELET_SIGNATURE_Up	1	1	1	1	1	1	1.42609	1	1.08602	1.19395	1	1	1.85009	1.89969	1.92772	1	1	1	1	1.46828	1.32391	1.81517	1	1	1.64576	1	1.00709	1.01909	1.65731	1	1.22084	1	1	1.15463	1	1	1	1.02634	1	1	1	1	1	1.2174	1	1	1
GO_2_IRON_2_SULFUR_CLUSTER_BINDING_Down	1	1	1	1	1	1	1	1	1	1	1	1	1	1	1	1	1	1	1.1557	1	1	1	1	1	1	1	1	1	1	1	1	1	1	1	1	1.43432	1	1	1	1	1	1	1	1	1	1	1
GO_2_IRON_2_SULFUR_CLUSTER_BINDING_Up	1	1	1	1	1	1	1	1	1	1	1	1.7246	1	1	1	1.28078	1	1.34847	1	1.25404	1	1.70084	1	1	1	1	1	1.36361	1.5194	1	1	1	1	1	1	1	1	1	1	1	1	1	1	1	1	1	1
GO_3_5_EXONUCLEASE_ACTIVITY_Down	1	1.10112	1	1.18878	1	1	1	1	1.44677	1.36365	1	1.51982	1	1.2903	1	1	1	1	1	1	1	1	1	1	1	1	1	1	1	1	1	1	1	1	1	1	1	1.34606	1	1	1	1	1	1.10509	1	1	1
GO_3_5_EXONUCLEASE_ACTIVITY_Up	1	1	1	1	1	1	1	1	1	1	1	1	1.19309	1	1	1.01859	1	1.0093	1	1.10327	1	1	1	1.21257	1.11429	1	1	1.1989	1.02955	1	1	1.36615	1	1.25968	1.0185	1	1	1	1	1	1	1	1	1	1	1	1
GO_4_IRON_4_SULFUR_CLUSTER_BINDING_Down	1	1	1.09691	1.21786	1	1.16966	1	1	1	1	1	1	1	1	1	1	1.28429	1	1	1	1	1	1	1	1	1	1	1	1	1	1	1	1	1	1	1	1	1.42995	1	1	1	1	1	1	1.02831	1	1
GO_4_IRON_4_SULFUR_CLUSTER_BINDING_Up	1	1	1	1	1	1	1	1.59711	1	1	1	1	1.59025	1.13427	1.40492	1.56469	1	1	1	1	1	1.36866	1	1.12608	1.43828	1	1	1	1.56359	1	1	1	1.01548	1.38445	1	1	1	1	1	1	1.08792	1	1.4108	1	1	1	1
GO_90S_PRERIBOSOME_Down	1	1	1	1	1.55607	1	1	1	1	1	1	1	1	1	1	1	1	1	1	1	1	1	1	1	1	1	1	1	1	1	1.05208	1.04803	1	1	1	1.35828	1	1.38533	1.4917	1	1	1	1	1	1.23162	1	1
GO_90S_PRERIBOSOME_Up	1	1	1	1	1	1.32665	1	1	1	1	1	1	1.67255	1	1.28333	1	1	1	1	1	1	1.27148	1.48678	1	1.3264	1	1	1.39192	1	1.09241	1	1	1	1	1	1	1	1	1	1	1.04347	1.13681	1.6078	1	1	1	1
GO_A_BAND_Down	1	1	1	1	1	1	1	1	1	1	1	1	1	1	1	1	1.0819	1	1	1	1	1.61306	1	1	1	1	1	1	1.44801	1	1	1	1	1	1	1	1	1	1	1	1.24548	1	1	1	1	1	1
GO_A_BAND_Up	1	1	1	1	1	1	1	1	1	1	1	1	1	1	1	1.02102	1	1	1	1	1	1	1	1	1	1	1	1	1	1	1	1	1	1	1	1	1	1	1	1	1	1	1	1	1.01149	1.46244	1
GO_ACETYL_COA_METABOLIC_PROCESS_Down	1	1	1	1	1	1	1	1	1	1	1	1	1	1	1	1	1.22199	1.04817	1.55888	1	1.64387	1.19501	1	1	1	1	1	1	1.34088	1	1	1.19688	1	1	1	1	1	1	1	1	1	1	1	1	1	1	1
GO_ACETYL_COA_METABOLIC_PROCESS_Up	1	1	1	1	1.02418	1	1	1	1	1	1	1	1	1	1	1	1	1	1	1	1	1	1	1	1	1	1	1	1	1	1	1	1	1	1	1	1	1	1	1	1	1	1	1	1	1	1
GO_ACETYLGALACTOSAMINYLTRANSFERASE_ACTIVITY_Down	1	1	1	1	1	1	1.10727	1	1	1	1	1	1	1	1	1.40485	1	1.09346	1	1.28834	1.10667	1.0013	1	1.1005	1	1	1	1	1.45783	1	1.49556	1	1	1	1.05899	1	1	1	1	1	1	1	1	1	1	1	1
GO_ACETYLGALACTOSAMINYLTRANSFERASE_ACTIVITY_Up	1	1.26999	1	1	1.32909	1	1	1.10921	1	1.39137	1.73929	1	1	1	1	1	1.08056	1	1	1	1	1	1	1	1	1	1.10777	1	1	1	1	1	1	1	1	1	1	1	1	1	1	1	1	1.37089	1.3497	1.34204	1.00655
GO_ACETYLGLUCOSAMINYLTRANSFERASE_ACTIVITY_Down	1	1	1.09886	1	1	1	1	1	1	1	1	1	1.29868	1	1.15061	1.25423	1	1.0187	1	1	1	1.06161	1	1	1.21683	1	1	1	1	1	1	1	1.25586	1	1.20676	1	1	1	1	1	1	1	1	1	1	1	1
GO_ACETYLGLUCOSAMINYLTRANSFERASE_ACTIVITY_Up	1	1	1	1	1	1	1	1	1.17712	1.391	1.50964	1	1	1	1	1	1.25634	1	1.18409	1	1	1	1.59891	1	1	1	1.36698	1.12314	1	1.07119	1	1	1	1.28254	1	1	1.16926	1	1.4002	1	1	1	1	1	1	1	1.12917
GO_ACETYLTRANSFERASE_ACTIVITY_Down	1.20268	1.1449	1	1.07684	1.33865	1	1	1	1	1	1	1	1.13049	1.0602	1.15927	1	1.04929	1.34771	1	1	1	1.14083	1	1	1	1	1	1	1	1	1	1	1	1	1	1	1	1.24032	1	1	1	1	1	1.14878	1.32338	1	1.085
GO_ACETYLTRANSFERASE_ACTIVITY_Up	1	1	1	1	1	1	1	1	1.25233	1	1	1	1	1	1	1	1	1	1	1	1	1	1	1	1	1.1014	1	1	1	1	1	1.14887	1	1	1	1.00296	1	1	1	1	1.10031	1.12612	1.03238	1	1	1	1
GO_ACETYLTRANSFERASE_COMPLEX_Down	1	1.04642	1	1.45108	1.9282	1	1.06063	1.1525	1	1.45516	1.26631	1.24092	1	1.3387	1.19765	1	1	1.38625	1	1	1	1.21488	1	1	1	1	1.04202	1	1	1	1	1	1.23759	1	1	1	1	1.51289	1.43433	1	1	1	1	1.36654	1.2374	1	1
GO_ACETYLTRANSFERASE_COMPLEX_Up	1	1	1	1	1	1	1	1	1	1	1	1	1	1	1	1	1	1	1	1	1	1	1	1	1	1	1	1	1	1	1	1	1	1	1.07949	1.16509	1	1	1	1	1	1	1	1	1	1	1
GO_ACID_SECRETION_Down	1	1	1	1	1	1	1	1.95902	1.17015	1	1	1	1.66387	1	1.53122	1.29333	1	1	1.14426	1	1	1	1	1	1	1	1	1	1	1	1	1.16862	1	1.34208	1.21782	1.55106	1	1.46186	1	1	1	1.26382	1	1.31293	1	1	1.05217
GO_ACID_SECRETION_Up	1.45531	1.44558	1.15088	1	1.2867	1	1	1	1	1	1.56281	1.11444	1	1	1	1	1.46119	1	1	1.33613	1	1	1.11566	1.15606	1.06913	1.22305	1.37275	1.03143	1	1	1.10341	1	1.08097	1	1	1	1.49376	1	1	1	1	1	1	1	1	1	1
GO_ACIDIC_AMINO_ACID_TRANSPORT_Down	1	1	1	1	1	1	1	1	1	1	1	1	1.45139	1	1	1	1	1	1	1	1	1	1	1	1.25345	1	1.05926	1.12407	1.08755	1	1	1.84237	1	1	1	1	1	1	1	1	1	1	1	1	1	1	1
GO_ACIDIC_AMINO_ACID_TRANSPORT_Up	1	1	1	1	1	1	1	1	1	1	1.84283	1	1	1.11523	1	1	1	1.10042	1.15909	1.2089	1.38598	1.09165	1	1	1	1	1	1	1	1	1	1	1	1	1	1	1	1	1	1	1	1.2492	1	1	1	1	1
GO_ACROSOMAL_VESICLE_Down	1.20714	1.0882	1.04885	1	1	1.25569	1	1.06773	1	1	1	1	1	1	1	1	1	1	1.34648	1	1	1	1	1	2.21921	2.11643	1	1.88697	1	1.23362	1	1	1	1.18786	1	1	1.26065	1	1	1.10448	1.08516	1.32831	1	1	1	1	1.86403
GO_ACROSOMAL_VESICLE_Up	1	1	1	1	1.4529	1	1	1	1	1	1	1	1.08042	1.11511	1.10996	1	1	1	1	1.33038	1.23915	1.08818	1	1	1	1	1	1	1.39502	1	1	1	1.02956	1	1.09846	1	1	1	1.10836	1	1	1	1.05812	1	1	1.18796	1
GO_ACTIN_BASED_CELL_PROJECTION_Down	1	1	1	1.08319	1	1.07745	1	1.40874	1	1	1	1	1.55337	1.13376	1.31022	1.06036	1	1	1.21171	1	1	1.44472	1	1	1	1.00836	1	1.21018	1.24622	1.30123	1	1	1	1.30587	1	1	1	1	1	1.04964	1.64878	1.49984	1	1	1	1	1
GO_ACTIN_BASED_CELL_PROJECTION_Up	1	1	1.25837	1	1	1	1	1	1	1	1.02985	1	1	1	1	1	1	1	1	1	1	1	1	1	1	1	1	1	1	1	1	1	1.33586	1	1.17797	1.3328	1	1.31413	1.53227	1	1	1	1	1.11575	1.05852	1.62609	1
GO_ACTIN_BINDING_Down	1	1	1	1	1	1.14839	1	2.01509	1	1.11916	1	1.03031	1.66812	1.39401	1.65653	1.33603	1	1.10092	1.30836	1	1.1364	1.6791	1.276	1.19236	1	1.3161	1	1.22212	1.39862	1.47369	1	1	1	1.84805	1	1	1	1	1	1	1.42755	1.39646	1	1	1	1	1.20504
GO_ACTIN_BINDING_Up	1.25264	1.20302	1.01798	1.17392	1.22811	1	1.34185	1	1.04728	1	1	1	1	1	1	1	1.04307	1	1	1.22407	1	1	1	1	1.20168	1	1	1	1	1	1.1501	1	1.43785	1	1.32838	1.63982	1	1.5861	1	1	1	1	1.06882	1.622	1.4649	1.49236	1
GO_ACTIN_CYTOSKELETON_Down	1	1	1	1	1	1.27844	1	1.40175	1	1	1	1.05082	1.43358	1.28577	1.45734	1.22608	1	1	1.19416	1	1	1.26793	1.17641	1.08071	1	1.19233	1	1	1.47222	1.46818	1	1	1	1.7042	1	1	1	1	1	1	1.16296	1.15844	1	1	1	1	1.0645
GO_ACTIN_CYTOSKELETON_REORGANIZATION_Down	1	1	1	1.21204	1	1.36961	1	1.30038	1	1	1	1	1.4821	1.16272	1.40555	1	1	1	1.49853	1	1.2143	1.34351	1	1	1	1	1	1	1	1.09135	1	1	1	1.24851	1	1	1	1	1.11905	1	1	1	1	1	1	1	1.4573
GO_ACTIN_CYTOSKELETON_REORGANIZATION_Up	1.23493	1.6308	1.16077	1	1	1	1.44062	1	1	1	1.08858	1	1	1	1	1.05602	1	1.13456	1	1.24893	1	1	1	1	1.19609	1	1	1	1	1	1.58898	1	1	1	1.16264	1	1.09072	1.08509	1	1	1	1	1.028	1.34815	1	1	1
GO_ACTIN_CYTOSKELETON_Up	1	1.07298	1	1	1.23494	1	1.39103	1	1.15234	1	1	1	1	1	1	1	1.0933	1	1	1.22589	1.05405	1	1	1	1.13169	1	1	1	1	1	1.24687	1.01171	1.23394	1	1.31043	1.50677	1	1.59517	1.08968	1	1	1	1.14439	1.59081	1.26773	1.24951	1
GO_ACTIN_FILAMENT_BASED_MOVEMENT_Down	1	1	1	1	1	1.53291	1	1.8696	1	1	1	1	1.61055	1.27092	1.41837	1.45669	1	1	1	1	1	1.27835	1.51429	1.61774	1.35469	1.3293	1.42509	1.42963	1.44831	1.49088	1	1	1	1.40456	1	1	1.30751	1	1	1	1.39458	1.2972	1	1	1	1	1.19885
GO_ACTIN_FILAMENT_BASED_MOVEMENT_Up	1.55172	1.38542	1.26536	1	1.63301	1	1.39391	1	1.75624	1.069	1	1	1	1	1	1	1.45752	1.02827	1	1.13389	1.08737	1	1	1	1	1	1	1	1	1	1.18621	1	1.13339	1	1.18581	1.22025	1	1.26627	1.1181	1	1	1	1	1.78075	1.53734	1.18345	1
GO_ACTIN_FILAMENT_BASED_PROCESS_Down	1	1	1	1	1	1.29946	1	1.45427	1	1	1	1.03209	1.37296	1.47739	1.42465	1.24277	1	1	1.1656	1	1	1.5843	1.19005	1.24733	1	1.01916	1	1.13224	1.35622	1.60172	1	1	1	1.68795	1	1	1	1	1	1	1.22428	1.0601	1	1	1	1	1.3827
GO_ACTIN_FILAMENT_BASED_PROCESS_Up	1.26705	1.26783	1.13799	1.00161	1.13282	1	1.38068	1	1.13372	1.04702	1	1	1	1	1	1	1.11307	1	1	1.1311	1	1	1	1	1.03918	1	1	1	1	1	1.20835	1	1.32076	1	1.06407	1.39044	1	1.31265	1	1	1	1	1.01436	1.55404	1.28451	1.34281	1
GO_ACTIN_FILAMENT_BINDING_Down	1	1	1	1	1	1.49788	1	1.80826	1	1	1	1	1.2957	1	1.04258	1.01836	1	1	1.40041	1	1.16639	1.04473	1.2203	1.09902	1	1.27505	1.22205	1	1.08121	1.29375	1	1	1	1.89985	1	1	1.44362	1	1	1	1.52337	1.59873	1	1	1	1	1.20183
GO_ACTIN_FILAMENT_BINDING_Up	1.2291	1.16341	1	1	1.29959	1	1.3093	1	1.3194	1	1	1	1	1	1	1	1.05419	1	1	1.30386	1	1	1	1	1	1	1	1	1	1	1.10193	1.11476	1.5804	1	1.62875	1.39723	1	1.43746	1	1	1	1	1.22845	1.64022	1.37083	1.5832	1
GO_ACTIN_FILAMENT_BUNDLE_Down	1	1	1.05912	1	1	1	1	1.30706	1.07582	1	1	1.11799	1.11496	1	1	1	1.15435	1.20408	1	1	1	1	1.35432	1	1	1.43329	1	1.20366	1.95273	1	1	1	1	1.65695	1	1	1.33627	1	1	1	1	1	1	1	1	1	1
GO_ACTIN_FILAMENT_BUNDLE_ORGANIZATION_Down	1	1	1	1	1.04299	1	1	1	1	1	1	1	1	1.1554	1.06965	1.37691	1	1	1	1	1	1	1	1	1	1	1	1	1	1.07941	1	1	1	1	1	1	1	1	1	1	1	1.04832	1	1	1	1	1.12965
GO_ACTIN_FILAMENT_BUNDLE_ORGANIZATION_Up	1.40366	1.33096	1.59654	1	1	1	1.1538	1	1	1	1	1	1	1	1	1	1.33089	1	1	1.26934	1	1	1	1	1	1	1.43382	1	1	1	1	1	1.16709	1	1	1.03441	1	1.64677	1	1	1	1	1.23716	1.0684	1	1	1
GO_ACTIN_FILAMENT_BUNDLE_Up	1	1.26486	1	1.1055	1.25321	1	1.82256	1	1	1	1	1	1	1	1	1	1	1	1	1.11338	1	1	1	1	1.57416	1	1.2321	1	1	1	1.25765	1	1.2863	1	1	1	1	1.89713	1	1	1	1	1.71037	1.75658	1.36298	1	1
GO_ACTIN_FILAMENT_Down	1	1	1	1.36379	1	1.30131	1	1	1	1	1	1.29545	1.01915	1	1	1.3938	1	1	1	1	1	1	1	1	1	1.43294	1	1	1	1.08428	1	1	1.04869	1	1	1	1	1	1	1.18415	1	1	1	1	1	1	1
GO_ACTIN_FILAMENT_ORGANIZATION_Down	1	1	1	1.02064	1	1	1	1	1	1	1	1	1	1.31135	1	1.48344	1	1.2816	1.21096	1	1	1.40914	1	1	1	1	1	1	1.32872	1.45131	1	1	1	1.25159	1	1	1	1	1	1	1.10117	1	1	1	1	1	1.11463
GO_ACTIN_FILAMENT_ORGANIZATION_Up	1.13549	1.26066	1.1416	1	1	1	1.0082	1	1.00237	1.07202	1	1	1	1	1	1	1.11684	1	1	1	1	1	1	1	1	1	1	1	1	1	1.20373	1	1.53751	1	1	1.21766	1	1.53745	1	1	1	1	1.22711	1.09915	1.02211	1.26432	1
GO_ACTIN_FILAMENT_Up	1	1	1	1	1.34396	1	1.45589	1	1.33951	1	1	1	1	1	1	1	1.50086	1	1	1.09424	1.12623	1	1	1	1	1	1	1	1	1	1.14434	1.3063	1	1	1.4256	1.58441	1	1.14698	1	1	1	1	1.48973	1.42213	1.30354	1.13366	1
GO_ACTIN_MEDIATED_CELL_CONTRACTION_Down	1	1	1	1	1	1.2695	1	1.39675	1	1	1	1	1.37265	1.03874	1.1994	1.46996	1	1	1	1	1	1.17821	1.60665	1.6452	1.4923	1.39291	1.51595	1.44585	1.56878	1.22525	1	1	1	1	1	1.16737	1.19745	1	1	1	1.2351	1.13382	1.18711	1	1	1	1.22724
GO_ACTIN_MEDIATED_CELL_CONTRACTION_Up	1.26702	1.34948	1	1.10802	1.71016	1	1.468	1	1.90525	1.30934	1	1.08428	1	1	1	1	1.48821	1.13072	1.25193	1.07799	1.20829	1	1	1	1	1	1	1	1	1	1.3206	1	1.34288	1	1	1	1	1	1	1	1	1	1	1.7745	1.54567	1.13205	1
GO_ACTIN_MYOSIN_FILAMENT_SLIDING_Down	1	1	1	1	1	1	1	1	1	1	1	1	1	1	1	1.34371	1	1	1	1	1	1	1	1	1	1	1	1	1.89239	1	1	1	1	1	1	1	1	1	1	1	1	1	1	1	1	1.33065	1
GO_ACTIN_MYOSIN_FILAMENT_SLIDING_Up	1	1	1	1	1	1	1	1	2.35064	1	1	1.36299	1	1	1	1	1.25025	1.02621	1	1	1	1.23596	1	1	1	1	1	1	1	1	1	1	1	1	1	1	1	1	1	1	1	1	1	1	1	1	1
GO_ACTIN_POLYMERIZATION_OR_DEPOLYMERIZATION_Down	1	1	1	1.61587	1	1	1	1	1	1	1	1	1	1	1	1.30896	1	1.40409	1	1	1	1.12035	1	1	1	1	1	1	1.15783	1.37265	1	1	1	1	1	1	1	1	1	1	1.02573	1	1	1	1	1	1
GO_ACTIN_POLYMERIZATION_OR_DEPOLYMERIZATION_Up	1	1	1	1	1	1	1.21685	1	1	1	1	1	1	1	1	1	1	1	1	1	1	1	1	1	1	1	1	1	1	1	1.13601	1	1.60534	1	1	1	1	1.37498	1	1	1	1	1.05146	1.04689	1.16579	1.21377	1
GO_ACTININ_BINDING_Down	1	1	1	1	1	1	1	1	1	1	1	1	1.55373	1.52946	1.41603	1.05201	1	1	1	1	1	1.56299	1	1	1	1.01157	1.20557	1.14022	2.01388	1	1	1	1	1	1	1	1	1	1	1	1.35072	1.2025	1	1	1	1	1
GO_ACTININ_BINDING_Up	1	1	1	1	1.44574	1	1	1	1	1	1	1.06068	1	1	1	1	1.05254	1.02802	1	1	1	1	1	1	1	1	1	1	1	1	1	1	1	1	1.68364	1	1.00377	1	1	1	1	1	1	1.4476	1.39747	1.70231	1
GO_ACTION_POTENTIAL_Down	1	1.06026	1	1	1	1.05788	1	2.26697	1.25607	1.41015	1	1.3201	2.11614	1.28499	1.99535	1.17801	1	1	1	1	1	1.37434	1.54816	1.42721	1.69358	1	1.00306	1.76856	1.32418	1.64752	1.16944	1.32165	1.69338	1	1	1	1	1.76833	1	1.47264	1.55509	1.74445	1.61536	1.2834	1	1	1.38725
GO_ACTION_POTENTIAL_Up	1	1	1	1.70527	1.36391	1	1	1	1	1	1.02863	1	1	1	1	1	1.10257	1	1.20038	1	1	1	1	1	1	1	1	1	1	1	1	1	1	1	1	1.21923	1	1	1.30189	1	1	1	1	1	1.3584	1.40472	1
GO_ACTIVATING_TRANSCRIPTION_FACTOR_BINDING_Down	1.6108	1.53634	1.53539	1.17622	1	1.99041	1	1.40285	1.79074	1.38585	1.32368	1.46708	1.54725	1.5762	1.45979	1	1	1	1.00865	1	1	1.65834	1	1	1	1	1.42693	1.07094	1.41573	1.38705	1	1.24708	1	1.56687	1.07282	1	1	1	1	1	1.93823	1.6806	1	1	1	1	1.64787
GO_ACTIVATING_TRANSCRIPTION_FACTOR_BINDING_Up	1	1	1	1	1	1	1	1	1	1	1	1	1	1	1	1.17971	1	1.25015	1	1.01744	1	1	1	1	1.32916	1	1	1	1	1	1.08766	1	1	1	1	1.18675	1	1	1	1	1	1	1.07667	1.21726	1.48964	1.39068	1
GO_ACTIVATION_OF_ADENYLATE_CYCLASE_ACTIVITY_Down	1	1	1	1	1	1	1	1	1	1	1	1	1.4872	1	1.43557	1.10069	1	1	1	1	1	1	1	1	1.50898	1.08215	1	1	1	1	1	1.13558	1	1	1.00863	1	1	1	1	1	1	1	1	1	1	1	1
GO_ACTIVATION_OF_ADENYLATE_CYCLASE_ACTIVITY_Up	1	1	1	1.05275	1.15064	1	1.36116	1	1.09595	1.21093	1.28799	1	1	1	1	1	1.08467	1.07266	1.25608	1	1.33181	1.15393	1	1	1	1	1	1	1	1	1	1	1	1	1	1	1.08779	1	1	1.40019	1	1.07842	1	1.44382	1.41711	1.00344	1
GO_ACTIVATION_OF_CYSTEINE_TYPE_ENDOPEPTIDASE_ACTIVITY_Down	1.1917	1	1.02772	1	1	1	1	1	1	1	1.26553	1	1	1	1	1	1	1	1.4173	1	1.14188	1	1	1	1.05089	1.04253	1	1	1	1	1	1	1	1	1.27403	1.30805	1	1	1.28958	1.21183	1	1	1	1	1	1	1
GO_ACTIVATION_OF_CYSTEINE_TYPE_ENDOPEPTIDASE_ACTIVITY_Up	1	1	1	1.54932	1.28261	1	1.24525	1.20664	1.18658	1.0256	1	1	1.1177	1	1	1	1.05588	1.1711	1	1.39177	1	1.02221	1	1	1	1	1	1	1	1.5618	1	1.09091	1	1.25685	1	1	1.32975	1.48079	1	1	1	1	1	1.48506	1.22435	1.27872	1.10659
GO_ACTIVATION_OF_GTPASE_ACTIVITY_Down	1	1	1	1.10335	1	1.54788	1	1	1	1	1	1	1.6444	1.68204	1.9435	1	1	1	1.03542	1	1	1.69004	1	1	1	1	1.00366	1.1494	1.28202	1.68257	1	1	1	1	1	1	1	1	1	1.16604	1.21264	1.32371	1	1	1	1	1
GO_ACTIVATION_OF_GTPASE_ACTIVITY_Up	1.62973	1.44072	1.47941	1	1	1	1	1	1.04588	1	1.31304	1	1	1	1	1	1	1	1	1.00277	1	1	1	1	1	1	1	1	1	1	1	1.22582	1.16995	1	1.46505	1.77133	1	1	1	1	1	1	1.06514	1.0372	1.05475	1	1
GO_ACTIVATION_OF_IMMUNE_RESPONSE_Down	1	1	1	1	1	1	1	1	1	1	1	1	1	1	1	1.02083	1	1	1.04656	1	1	1	1.14922	1	1	1.37283	1.02257	1.16027	1	1	1	1	1	1.05344	1	1	1	1	1	1.05964	1.35419	1.22191	1	1	1	1	1
GO_ACTIVATION_OF_IMMUNE_RESPONSE_Up	1	1	1	1.23231	1.28656	1	1.38189	1.22915	1	1.56771	1	1.40327	1.37172	1.19196	1.27366	1	1.17575	1.03371	1	1.02011	1	1.30714	1	1	1	1	1	1	1	1	1.06357	1.13227	1.13342	1	1	1.08548	1.04625	1.64495	1	1	1	1	1	1	1.15461	1.47073	1.06218
GO_ACTIVATION_OF_INNATE_IMMUNE_RESPONSE_Down	1	1	1	1	1	1	1	1	1.09869	1	1.03126	1	1	1	1	1	1	1	1.21077	1	1	1	1.14419	1	1	1.4528	1	1.0989	1	1	1	1	1	1	1	1	1	1	1	1	1.56483	1.21886	1	1	1	1	1
GO_ACTIVATION_OF_INNATE_IMMUNE_RESPONSE_Up	1	1	1	1.53699	1.06197	1	1.4258	1.43496	1	1.43334	1	1.64371	1.53928	1.42337	1.53088	1	1	1.11897	1	1	1	1.54043	1	1	1	1	1	1	1	1.14314	1.0984	1.22244	1.21302	1	1	1	1	1.76917	1	1	1	1	1	1.12136	1.00147	1.33016	1.2717
GO_ACTIVATION_OF_JUN_KINASE_ACTIVITY_Down	1	1	1	1	1	1.42319	1	1.40063	1	1	1	1	1.17315	1.6369	1.53453	1	1	1	1.34934	1	1	1.16429	1	1	1	1	1	1	1	1.34238	1.19472	1.11987	1.01078	1.24636	1	1	1	1	1	1	1	1	1	1	1	1	1
GO_ACTIVATION_OF_JUN_KINASE_ACTIVITY_Up	1	1	1	1	1	1	1.19848	1	1.27925	1	1	1	1	1	1	1.10809	1	1.07499	1	1.21535	1	1	1	1.17486	1.50751	1	1	1	1	1	1	1	1	1	1	1.29342	1	1	1	1	1	1	1.2031	1.19923	1	1	1
GO_ACTIVATION_OF_MAPK_ACTIVITY_Down	1	1	1	1.12299	1	1.29008	1	1.01915	1	1	1	1	1.30175	1.2488	1.44996	1	1	1	1.26506	1	1	1	1	1	1	1.23832	1	1	1	1.04773	1	1	1	1	1.14831	1	1	1	1	1	1.21998	1.12187	1	1	1	1	1
GO_ACTIVATION_OF_MAPK_ACTIVITY_Up	1	1	1	1	1.1655	1	1.3916	1	1	1	1	1	1	1	1	1.4635	1	1.62925	1	1.31301	1	1	1	1.01459	1.39012	1	1.37875	1	1	1	1.10972	1.28011	1.27492	1	1	1	1.41834	1.50819	1	1	1	1	1	1.5337	1.45375	1.23415	1
GO_ACTIVATION_OF_MAPKK_ACTIVITY_Down	1	1	1	1	1	1.31928	1	1.74113	1	1.04674	1	1	2.07109	1.53814	1.78687	1	1	1	1	1	1	1.2106	1	1	1	1.01784	1	1.06946	1.03664	1.46302	1	1	1.02371	1	1	1	1	1	1	1.21362	1.21831	1.68318	1	1	1	1	1.30827
GO_ACTIVATION_OF_MAPKK_ACTIVITY_Up	1	1	1	1	1.0693	1	1.07003	1	1	1	1	1	1	1	1	1.26568	1	1.32196	1	1.0009	1	1	1	1	1	1	1	1	1	1	1	1	1	1	1.40264	2.00174	1	1	1.08557	1	1	1	1.21173	1.59389	1.38785	1.27428	1
GO_ACTIVATION_OF_PROTEIN_KINASE_ACTIVITY_Down	1	1	1	1	1	1.40338	1	1.15382	1	1	1	1	1.40552	1.29824	1.54104	1	1	1	1.18297	1	1	1.11277	1.0871	1	1	1.16748	1	1	1.11016	1.37221	1	1	1	1	1.04412	1	1	1	1	1.27217	1.20555	1.30957	1	1	1	1	1.11984
GO_ACTIVATION_OF_PROTEIN_KINASE_ACTIVITY_Up	1	1	1	1.00793	1.0725	1	1.39748	1	1	1	1	1	1	1	1	1.23833	1	1.41092	1	1.0582	1	1	1	1	1.19242	1	1.14454	1	1	1	1.1092	1.08393	1.01201	1	1	1.32544	1.4808	1.51019	1	1	1	1	1	1.6757	1.49756	1.21669	1
GO_ACTIVE_ION_TRANSMEMBRANE_TRANSPORTER_ACTIVITY_Down	1	1	1.16656	1	1	1	1	1.26792	1.32507	1	1	1.18063	1.46814	1	1	1	1	1	1.04445	1	1	1	1	1.14311	1	1	1	1	1	1	1	1	1	1.24326	1.48628	1	1	1	1	1.21773	1	1.22878	1.00563	1.05935	1	1	1
GO_ACTIVE_ION_TRANSMEMBRANE_TRANSPORTER_ACTIVITY_Up	1	1	1	1.06757	1.50361	1	1	1	1	1	1.82274	1	1	1.32669	1	1.66571	1.19179	1.96257	1	1.86728	1.92661	1.68662	1	1	1	1	1.51516	1	1.4068	1	2.20948	1.33352	1.15461	1	1	1.12213	1	1.31991	1	1	1	1	1	1	1.31955	1.72541	1
GO_ACTIVE_TRANSMEMBRANE_TRANSPORTER_ACTIVITY_Down	1.12756	1	1.40696	1	1	1	1	1.30169	1.40177	1	1	1.06181	1.74849	1	1.07259	1	1	1	1.44949	1	1	1	1.04556	1.14222	1.37847	1	1	1.07796	1	1	1	1	1	1.13838	1.16516	1	1	1	1.21308	1.2659	1.44977	1.61001	1.07884	1	1	1	1.10149
GO_ACTIVE_TRANSMEMBRANE_TRANSPORTER_ACTIVITY_Up	1	1.03347	1	1.22302	1.53289	1	1	1	1	1	1.81251	1	1	1.42329	1	1.76264	1	1.78736	1	1.65262	1.38795	1.37151	1	1	1	1	1.32965	1	1.13477	1.12015	2.0548	1.28955	1.28815	1	1	1	1.10101	1.3497	1	1	1	1	1	1	1.25636	1.64141	1
GO_ACTOMYOSIN_Down	1.04695	1	1.09554	1	1	1.01016	1	1.43689	1	1	1	1.17853	1.41034	1.07572	1.32673	1.18816	1	1.1889	1	1	1	1.17542	1.19873	1	1	1.31821	1	1.0966	2.09013	1.08089	1	1	1	1.73282	1	1	1.32747	1	1.17978	1	1	1.0043	1	1	1	1	1
GO_ACTOMYOSIN_STRUCTURE_ORGANIZATION_Down	1	1	1	1	1	1.16762	1	1.16801	1	1	1	1	1.30788	1.42439	1.44779	1.3616	1	1	1	1	1	1.52751	1	1.15164	1	1	1	1.27742	1.44576	1.13737	1	1	1	1.62236	1	1	1	1	1	1	1.14296	1	1	1	1	1	1.04633
GO_ACTOMYOSIN_STRUCTURE_ORGANIZATION_Up	1.31618	1.00999	1.68172	1.65238	1.45817	1	1.63374	1	1.15519	1	1.01598	1	1	1	1	1	1.0253	1	1	1.22547	1.10588	1	1	1	1.27083	1	1.07211	1	1	1	1	1	1.16537	1	1	1.2433	1	1.07193	1	1.19974	1	1	1.30697	1.73506	1.20003	1	1
GO_ACTOMYOSIN_Up	1	1	1	1	1.14749	1	1.6793	1	1	1	1	1	1	1	1	1	1	1	1	1.0814	1	1	1	1	1.43575	1	1.09172	1	1	1	1.31691	1	1.26154	1	1	1	1	1.8502	1	1	1	1	1.69054	1.61079	1.25423	1	1
GO_ACUTE_INFLAMMATORY_RESPONSE_Down	1	1	1	1	1	1	1	1	1.52642	1	1.16019	1	1	1	1	1	1	1	1.09764	1	1	1	1	1	1	1.55391	1	1	1	1.21465	1	1	1	1	1	1	1	1	1	1.08555	1.70483	1.22069	1	1	1	1	1
GO_ACUTE_INFLAMMATORY_RESPONSE_Up	1	1	1	1	1.64834	1	1.3925	1.63	1	1.7257	1	1.00734	1.53696	1.52689	1.30408	1.42007	1.29407	2.06074	1	1.80632	1.63641	1.90587	1.18563	1	1	1	1.49101	1.61619	1.40418	1	1	1.27515	1	1	1	1	1.67086	1.3364	1.74401	1	1	1	1	1.38283	1.56638	1.72239	1
GO_ACYLGLYCEROL_O_ACYLTRANSFERASE_ACTIVITY_Down	1.06331	1	1	1	1	1	1	1	1	1	1	1	1	1	1	1	1.10153	1.23433	1	1	1	1	1	1	1.69349	1.16481	1	1.0432	1.09806	1	1	1	1	1.16761	1	1	1	1	1	1.58474	1	1	1	1	1	1	1
GO_ACYLGLYCEROL_O_ACYLTRANSFERASE_ACTIVITY_Up	1	1	1	1	1.00474	1	1	1.02335	1	1	1	1	1	1	1	1	1	1	1	1	1	1	1	1	1	1	1.27504	1	1	1	1	1	1	1	1	1	1	1.28487	1.32718	1	1.49191	1	1	1.00973	1	1	1
GO_ADAPTIVE_IMMUNE_RESPONSE_BASED_ON_SOMATIC_RECOMBINATION_OF_IMMUNE_RECEPTORS_BUILT_FROM_IMMUNOGLOBULIN_SUPERFAMILY_DOMAINS_Down	1.01604	1.10114	1.22684	1	1	1	2.13216	1	1	1	1	1	1	1	1	1	1.09548	1	1.15531	1	1	1	1.45701	1.21138	1.18462	1.3875	1.05133	1.13219	1	1	1	1	1	1	1.30043	1	1	1	1	1.49928	1.49782	1.59417	1	1	1	1	1
GO_ADAPTIVE_IMMUNE_RESPONSE_BASED_ON_SOMATIC_RECOMBINATION_OF_IMMUNE_RECEPTORS_BUILT_FROM_IMMUNOGLOBULIN_SUPERFAMILY_DOMAINS_Up	1	1	1	1	1.67942	1	1	1.18229	1.31074	1.83585	2.0936	1.36745	1.77014	1.45037	1.45871	1.55032	1	1.59264	1	1.68903	1.38078	1.53934	1	1	1	1	1	1	1	1	1.39988	1	1.42828	1.03433	1	1.03997	1.38966	1.2757	1.45171	1	1	1	1.40237	1.64379	1.67629	1.73926	1
GO_ADAPTIVE_IMMUNE_RESPONSE_Down	1.06621	1.03136	1.24085	1	1	1.09049	1.46628	1	1	1	1	1	1	1	1	1	1	1	1.20038	1	1	1	1.47413	1.41734	1	1.35135	1.13858	1.11058	1	1	1	1	1	1	1	1	1	1	1	1.45116	1.65473	1.82519	1	1	1	1	1
GO_ADAPTIVE_IMMUNE_RESPONSE_Up	1	1	1	1.12792	1.71925	1	1	1	1	1.41434	2.01726	1.04036	1.19929	1.32559	1.0818	1.29606	1.16384	1.71571	1	1.43708	1.20832	1.17734	1	1	1.0442	1	1	1	1.03083	1.09648	1.31567	1.19913	1.60299	1	1	1.17805	1.25759	1.4013	1.11047	1	1	1	1.20276	1.68118	1.68748	1.75394	1.36155
GO_ADENYL_NUCLEOTIDE_BINDING_Down	1	1	1	1.14301	1	1.08808	1	1.35632	1	1.31217	1	1.22768	1.4236	1.54205	1.6389	1	1	1	1	1	1	1.38432	1	1	1	1	1	1	1	1.00478	1	1	1	1.21355	1	1	1	1.02179	1	1.18523	1.42933	1.47008	1	1	1	1	1
GO_ADENYL_NUCLEOTIDE_BINDING_Up	1.29896	1.14867	1.4298	1	1.07658	1	1	1	1	1	1.20581	1	1	1	1	1	1	1	1	1	1	1	1	1	1.28222	1	1	1	1	1	1	1.21554	1.08043	1	1.33416	1.22503	1.04368	1	1.06753	1	1	1	1	1	1	1.03754	1
GO_ADENYLATE_CYCLASE_ACTIVATING_G_PROTEIN_COUPLED_RECEPTOR_SIGNALING_PATHWAY_Down	1	1	1	1	1	1	1	1	1	1	1	1	1.67155	1.15833	1.57485	1.69719	1	1.30581	1	1	1	1	1.4173	1	1.25422	1	1	1.17565	1.14376	1.51408	1.16422	1.25729	1.11581	1	1.36439	1.19405	1	1	1	1	1	1	1.16079	1	1	1	1.12409
GO_ADENYLATE_CYCLASE_ACTIVATING_G_PROTEIN_COUPLED_RECEPTOR_SIGNALING_PATHWAY_Up	1	1	1	1.59237	1.42276	1.39929	1.65866	1	1.14983	1.7393	1.81384	1.33835	1	1	1	1	1.5151	1	1.50803	1.10747	1.53726	1	1	1.03083	1	1	1	1	1	1	1	1	1	1.17435	1	1	1.16867	1	1	1.26398	1	1	1	1.05575	1.66451	1.30504	1
GO_ADENYLATE_CYCLASE_INHIBITING_G_PROTEIN_COUPLED_RECEPTOR_SIGNALING_PATHWAY_Down	1.04196	1	1.44805	1	1	1	1	1.09908	1	1	1	1	2.14132	1	1.59183	2.03833	1	1	1	1	1	1.40399	1	1	1.78391	1.03123	1	1.61567	1.6555	1.54482	1	1	1	1	1	1.36134	1	1	1	1.09598	1.43593	1.35448	1	1.09236	1	1	1.28836
GO_ADENYLATE_CYCLASE_INHIBITING_G_PROTEIN_COUPLED_RECEPTOR_SIGNALING_PATHWAY_Up	1	1	1	1.06168	1.16796	1.61845	1.14546	1	1	1.40037	2.35921	1	1	1	1	1	2.02288	1	1	1	1	1	1	1	1	1	1	1	1	1	1	1.62583	1.11449	1.45935	1.70397	1	1.05611	1	1	1	1	1	1	1	1.33381	1.25905	1
GO_ADENYLATE_CYCLASE_MODULATING_G_PROTEIN_COUPLED_RECEPTOR_SIGNALING_PATHWAY_Down	1.07608	1	1.30649	1	1	1	1	1	1	1	1	1	2.10607	1.4016	1.83393	1.94856	1	1	1	1.14819	1.0159	1.40552	1.35782	1	1.57829	1	1	1.44234	1.56115	1.59488	1.07389	1	1	1	1.28327	1.39426	1	1	1	1	1.36652	1.24028	1.28485	1.29702	1	1	1.06676
GO_ADENYLATE_CYCLASE_MODULATING_G_PROTEIN_COUPLED_RECEPTOR_SIGNALING_PATHWAY_Up	1	1	1	1.28596	1.18643	1.69613	1.37097	1	1.03347	1.66005	2.137	1	1	1	1	1	2.07737	1	1	1	1	1	1	1	1	1	1	1	1	1	1	1.23601	1	1.48327	1	1	1.12892	1.78682	1	1.16723	1	1	1	1	1.47698	1.3294	1
GO_ADHERENS_JUNCTION_ASSEMBLY_Down	1	1	1	1	1	1.38878	1	1	1.31424	1	1	1	1.69061	1.90337	1.81352	1.08018	1	1.07988	1	1	1	1.79173	1	1	1	1	1	1	1.06873	1.59554	1	1.08493	1.29073	1	1	1	1	1	1	1.05616	1.1974	1.05783	1	1	1	1	1.34922
GO_ADHERENS_JUNCTION_ASSEMBLY_Up	1	1	1	1	1.23624	1	1.20645	1	1	1	1	1	1	1	1	1	1	1	1	1.1678	1	1	1	1	1.16891	1	1	1	1	1	1	1	1	1	1	1	1.00467	1.18623	1.11635	1	1	1	1.04787	1.66346	1.27074	1	1
GO_ADHERENS_JUNCTION_ORGANIZATION_Down	1	1	1.03091	1.21368	1	1.03194	1	1	1.27839	1	1	1.02998	2.11531	1.62387	1.91694	1.18915	1	1	1.15569	1	1	1.51717	1	1	1	1	1	1	1	1.36715	1	1.27814	1.03577	1.08899	1	1	1	1	1.10771	1	1.56511	1	1	1	1	1	1.64109
GO_ADHERENS_JUNCTION_ORGANIZATION_Up	1	1	1	1	1.24324	1	1.28434	1	1	1	1	1	1	1	1	1	1.12564	1.22764	1	1.6187	1.19825	1	1	1	1	1.08565	1	1	1	1	1	1	1	1	1.22046	1	1.05425	1.55637	1	1.38987	1	1	1	1.31964	1.161	1.37523	1
GO_ADIPOSE_TISSUE_DEVELOPMENT_Down	1	1	1	1	1	1.02603	1	1	1	1	1.12807	1	1.09499	1.06869	1.2094	1	1	1	1	1	1	1	1	1.07465	1	1	1	1	1	1	1	1	1	1	1	1	1	1	1	1	1.49629	1.2793	1	1	1	1	1.32478
GO_ADIPOSE_TISSUE_DEVELOPMENT_Up	1	1	1	1	1	1	1	1	1	1	1	1	1	1	1	1.1355	1	1.13567	1	1	1	1	1	1	1	1	1	1	1	1	1	1	1	1	1.11312	1	1	1	1	1	1	1	1	1.18158	1.04755	1.31387	1
GO_ADP_BINDING_Down	1	1	1	1	1	1	1	1	1	1	1	1	1	1	1	1	1	1	1	1	1	1	1	1	1	1.30948	1	1	1	1.16159	1	1	1.12475	1.05818	1	1	1	1	1.31414	1	1.49459	1.30894	1	1	1	1	1
GO_ADP_BINDING_Up	1	1	1	1	1	1	1	1	1.54088	1.18257	1.6653	1	1	1	1	1	1	1	1	1	1	1	1	1	1	1	1	1	1	1	1	1	1	1	1.10383	1.61151	1	1	1	1	1	1	1.31222	1	1	1	1.53003
GO_ADP_METABOLIC_PROCESS_Down	1.08439	1.1292	1.25615	1.38405	1	1.13964	1	1.01024	1	1	1	1	1	1	1	1	1	1	1.14862	1	1	1	1	1	1	1.58661	1	1.23829	1.41436	1	1	1	1	1	1	1.30168	1	1	1	1.39629	1	1	1	1	1	1	1.27205
GO_ADP_METABOLIC_PROCESS_Up	1	1	1	1	1	1	1	1	1.62775	1.40182	1.32552	1	1.17791	1.28066	1.26834	1	1	1	1	1	1	1.00286	1	1	1	1	1	1	1	1.18686	1	1	1.5347	1	1	1	1	1.10444	1.13515	1	1	1	1.15483	1.2333	1.18112	1	1
GO_ADULT_BEHAVIOR_Down	1.08208	1	1.15989	1	1	1	1	2.07241	1	1	1.00477	1	1.79501	1	1.2066	1.02436	1.29846	1.06508	1	1	1	1	1	1.05171	1.6713	1	1	1.64198	1.85318	1.82948	1	1.03198	1.07138	1.05609	1.11352	1	1	1	1	1.04928	1.65843	1.50181	1.28583	1.48303	1	1	1.3354
GO_ADULT_BEHAVIOR_Up	1	1	1	1	1	1.01734	1	1	1.00209	1	1	1	1	1.32289	1	1	1	1	1.1469	1	1	1.35123	1	1	1	1	1.01004	1	1	1	1	1	1	1	1	1.43582	1.51498	1	1	1	1	1	1	1	1	1.14885	1
GO_ADULT_LOCOMOTORY_BEHAVIOR_Down	1	1	1.07792	1.27989	1	1	1	1.80679	1	1	1.25155	1	1.11783	1	1	1	1.62317	1	1	1.22144	1.00061	1	1	1.01519	1.44892	1	1	1.48815	1.60154	1.67015	1	1	1	1.14119	1	1	1	1	1	1	1.47092	1.07688	1	1	1.14757	1	1.05885
GO_ADULT_LOCOMOTORY_BEHAVIOR_Up	1	1.07323	1	1	1	1	1.19911	1	1.04426	1	1	1	1	1.34176	1.25429	1.25669	1	1	1	1	1	1.61816	1	1	1	1	1	1	1	1	1	1	1	1	1	1.3114	1.7523	1	1	1	1	1	1	1.0213	1	1	1
GO_AEROBIC_RESPIRATION_Down	1.27215	1	1.59918	1	1.12462	1	1.33336	1	1	1	1	1	1	1	1	1	1	1	1	1	1	1	1	1	1	1	1	1	1	1	1	1	1	1	1	1.32158	1	1.0814	1.0595	1	1	1	1	1.0893	1.12188	1	1
GO_AEROBIC_RESPIRATION_Up	1	1	1	1	1	1	1	1.54245	1.23156	1.31685	1	1.48868	1.74292	1.87993	1.8729	1	1	1	1	1	1	1.59854	1	1	1	1	1	1	1	1.68016	1	1	1	1	1	1	1	1	1	1	1	1	1	1	1	1	1
GO_AGGRESOME_Down	1	1	1	1	1	1	1	1	1	1	1.01029	1	1	1	1	1	1.08179	1	1	1	1	1	1	1	1	1	1	1	1	1	1	1	1	1	1	1	1	1	1.23185	1	1	1	1	1	1	1	1
GO_AGGRESOME_Up	1.28543	1.12744	1.06031	1	1.19132	1	1.41653	1	1	1	1	1	1	1	1	1.52601	1	1.14615	1	1.59703	1.70634	1.3888	1	1	1.15781	1	1	1	1.09514	1	1	1	1	1	1	1	1.0014	1.23203	1	1	1	1.16931	1	1	1	1.10316	1
GO_AGING_Down	1.24578	1.12144	1.23305	1.06767	1	1.42038	1	1	1.08144	1	1	1	1.13142	1	1	1	1.27409	1	1.28942	1	1	1	1	1	1	1.20423	1	1	1	1.23685	1	1	1	1.11273	1.17574	1	1	1	1	1	1.70504	1.53508	1	1	1	1	1.00165
GO_AGING_Up	1	1	1	1	1.05618	1	1.72767	1.28094	1	1.39024	1	1.51235	1	1.18214	1	1.40602	1	1.32719	1	1.709	1.48078	1.22367	1	1	1.16049	1	1.2505	1	1	1	1.59323	1.18788	1.11813	1	1	1.50344	1.62503	1	1	1.21813	1	1	1.22971	1.73709	1.58952	1	1
GO_ALCOHOL_BINDING_Down	1	1	1	1	1	1	1	1.08473	1	1	1	1	1.55118	1.18528	1.27236	1	1.127	1	1.1036	1	1	1	1	1	1	1	1	1	1	1.13961	1	1	1	1.00711	1	1	1	1	1	1	1.19407	1.21994	1	1	1	1	1.21174
GO_ALCOHOL_BINDING_Up	1.53496	1.62227	1.05328	1.52092	1.35372	1.47837	1.21441	1	1	1.27646	1.00403	1	1	1	1	1.37412	1	1.32529	1	1.55341	1.31572	1.2289	1.21518	1.05175	1	1	1	1	1	1	1.77736	1.42096	1	1	1	1.54219	1.39876	1	1.33594	1.13131	1	1	1	1.04244	1	1	1
GO_ALCOHOL_BIOSYNTHETIC_PROCESS_Down	1	1	1.14952	1	1	1	1	1	1	1	1	1	1	1	1	1	1.18962	1	1.40618	1	1.22408	1	1	1.37837	1.41571	1	1	1	1.01313	1	1	1	1	1	1.4142	1.25282	1	1.01121	1	1.06733	1	1	1	1	1	1	1.53063
GO_ALCOHOL_BIOSYNTHETIC_PROCESS_Up	1	1	1	1	1.00434	1	1	1	1	1.17713	1.59558	1	1	1.34477	1	1.301	1	1	1	1.10491	1	1	1	1	1	1	1.58221	1	1	1.48541	1.31585	1	1.30493	1	1	1	1	1	1.15139	1	1	1	1	1.18591	1	1	1
GO_ALCOHOL_CATABOLIC_PROCESS_Down	1	1	1	1	1	1	1	1	1	1	1	1	1	1	1	1.38017	1	1.3856	1.48243	1	1.39175	1.05193	1.10999	1	1	1	1	1.05134	1.43758	1	1	1	1	1.07997	1	1	1.23606	1	1	1.29121	1.03977	1.17766	1	1	1	1	1
GO_ALCOHOL_CATABOLIC_PROCESS_Up	1.05572	1.47766	1	1.24026	1.22548	1	1.09699	1	1	1.45685	1.0982	1	1	1.13124	1	1	1.14429	1	1	1	1	1	1	1	1	1	1.58675	1	1	1	1	1	1.64237	1	1.23856	1	1	1.54773	1.31343	1	1	1	1.21431	1.53481	1.02647	1	1.08088
GO_ALCOHOL_METABOLIC_PROCESS_Down	1	1	1.33645	1	1	1	1	1	1	1	1	1	1	1	1	1	1.03257	1	1.42665	1	1.23992	1	1	1.12387	1.07954	1	1	1.01364	1.05663	1	1	1	1	1.16452	1.15576	1	1	1	1	1.07034	1	1	1	1	1	1	1.1793
GO_ALCOHOL_METABOLIC_PROCESS_Up	1	1	1	1.22655	1.14819	1.03543	1.17495	1	1	1.55631	1.4419	1.05822	1	1.26258	1	1.03074	1	1	1	1.11206	1	1	1	1	1	1	1.66609	1	1	1.19637	1.48468	1.13014	1.32303	1	1	1	1	1.15452	1.57297	1	1	1	1	1.35709	1.11821	1.07881	1
GO_ALDITOL_PHOSPHATE_METABOLIC_PROCESS_Down	1	1	1	1	1	1	1	1	1	1	1	1	1	1	1	1	1.32376	1.28592	1.35025	1	1.30484	1	1	1	1.27615	1.04085	1	1.10386	1	1	1	1.10038	1	1	1	1	1	1	1	1	1	1.21662	1	1	1	1	1
GO_ALDITOL_PHOSPHATE_METABOLIC_PROCESS_Up	1	1	1	1.24299	1.42056	1	1	1	1	1	1	1	1	1	1	1	1	1	1	1.06412	1	1	1	1	1	1	1	1	1	1	1.16125	1	1.42232	1	1	1	1	1	1	1	1	1	1	1	1	1.0618	1
GO_ALPHA_AMINO_ACID_BIOSYNTHETIC_PROCESS_Down	1	1	1	1.11283	1	1.02593	1	1	1	1	1	1	1	1	1	1	1.40201	1	1.02266	1	1.28902	1	1	1	1.23014	1	1	1	1	1	1.05253	1	1	1	1	1	1	1.6397	1	1	1	1	1	1	1	1	1
GO_ALPHA_AMINO_ACID_BIOSYNTHETIC_PROCESS_Up	1.1214	1.37221	1	1	1	1	1	2.33254	1.13454	2.04362	1.0049	1.64183	1.56765	1.61366	1.56906	1.02859	1	1	1	1	1	1.24476	1	1	1	1.37409	1.16966	1	1	1.21598	1	1	1	1.056	1	1	1.03129	1	1.13305	1	1.40362	1.40942	1.12555	1.04347	1	1.06716	1
GO_ALPHA_AMINO_ACID_CATABOLIC_PROCESS_Down	1	1	1.12139	1.42878	1	1.15569	1	1	1	1	1	1	1	1	1	1	1.39078	1	1.52068	1.22716	1.74549	1	1.0605	1.32656	1.24239	1.11987	1.28222	1.52365	1	1	1	1	1	1	1	1	1.78452	1	1	1.2809	1	1.15416	1	1	1	1	1.18434
GO_ALPHA_AMINO_ACID_CATABOLIC_PROCESS_Up	1	1	1	1	1.14195	1	1	1	1	1.55322	1.48577	1.50116	1	1.63981	1.15442	1	1	1	1	1	1	1	1	1	1	1	1	1	1	1	1	1	1	1	1	1.07633	1	1	1.60441	1	1	1	1	1	1.03044	1.2193	1
GO_ALPHA_AMINO_ACID_METABOLIC_PROCESS_Down	1	1	1.0365	1.35357	1	1.20325	1	1	1	1	1	1	1	1	1	1	1.42917	1	1.56014	1	1.61016	1	1	1.07671	1	1	1	1	1	1	1	1	1	1	1	1	1.00604	1.54199	1	1.14922	1	1.01006	1	1	1	1	1
GO_ALPHA_AMINO_ACID_METABOLIC_PROCESS_Up	1	1.08661	1	1	1	1	1.02277	1.43486	1.25848	1.85911	1.2465	1.50836	1.24691	1.76456	1.46329	1.09234	1	1	1	1	1	1	1	1	1	1	1	1	1	1	1	1	1.11951	1	1	1.10569	1	1	1.40941	1	1	1	1	1	1	1	1.15255
GO_ALPHA_BETA_T_CELL_ACTIVATION_Down	1.19139	1.12591	1.2296	1	1	1	1	1	1.02126	1	1.43963	1.33209	1	1	1	1	1	1	1	1	1	1	1.67795	1	1	1.2208	1	1	1.11488	1	1	1	1	1.29665	1	1	1	1	1	1	1.91053	1.85683	1	1	1	1	1
GO_ALPHA_BETA_T_CELL_ACTIVATION_Up	1	1	1	1	1.40636	1	1.62866	1	1	1	1	1	1.57184	1.27229	1.2557	1.43405	1.20934	1.91074	1	1.24579	1.34356	1.22265	1	1.22856	1.32219	1	1	1	1	1	1.20715	1	1	1	1.48682	1	1.89661	1.06375	1	1	1	1	1.23471	1.60745	1.72628	1.87667	1
GO_ALPHA_BETA_T_CELL_DIFFERENTIATION_Down	1	1	1	1	1	1	1	1.13989	1	1.09234	1.58083	1.43365	1	1	1	1	1	1	1	1	1	1	1.42053	1	1	1.267	1	1	1	1	1	1	1	1	1	1	1	1	1	1	1.89877	1.79055	1	1	1	1	1
GO_ALPHA_BETA_T_CELL_DIFFERENTIATION_Up	1	1	1	1	1.29974	1	1.6043	1	1	1	1	1	1.66254	1.02328	1.34774	1.35229	1.08849	1.84207	1	1.10213	1.03545	1.12952	1	1.3726	1.44831	1	1	1	1	1	1	1	1	1	1	1	1.84629	1	1	1	1	1	1	1.58439	1.71053	1.72067	1
GO_ALPHA_TUBULIN_BINDING_Down	1	1	1	1	1.26634	1	1	1	1	1	1	1	1	1	1	1	1	1	1.48526	1	1.19869	1	1	1.30097	1.04958	1	1	1	1	1	1	1.07986	1	1	1	1	1	1	1	1	1	1	1	1	1	1	1
GO_ALPHA_TUBULIN_BINDING_Up	1	1	1	1	1	1	1	1	1	1	1	1	1	1	1	1	1	1	1	1	1	1	1	1	1	1.00134	1	1	1.09687	1	1	1	1	1.73312	1	1	1	1	1	1	1	1	1	1	1	1.00583	1
GO_AMEBOIDAL_TYPE_CELL_MIGRATION_Down	1	1	1.26957	1	1	1.07651	1	1.055	1	1	1.45706	1.00405	1.48619	1.36555	1.53661	1	1	1	1.16331	1	1	1.26071	1	1	1	1	1	1	1	1.55523	1	1.6288	1.6242	1.68105	1	1	1.03589	1	1	1	1.83785	1.63231	1	1	1	1	1.6202
GO_AMEBOIDAL_TYPE_CELL_MIGRATION_Up	1	1	1	1.32346	1.01794	1	1.47036	1	1	1	1	1	1	1	1	1.09158	1.02658	1.2396	1	1.73754	1.51278	1	1	1	1.41196	1.05999	1.33049	1	1	1	1.29916	1	1	1	1	1	1	1	1	1	1	1	1.25251	1.82437	1.5857	1.06381	1
GO_AMIDE_BINDING_Down	1.21747	1	1.48369	1	1	1	1	1	1.09576	1	1	1	1	1	1	1.08316	1	1	1.23072	1	1	1	1	1.39023	1	1	1	1.25024	1	1	1	1	1	1.15979	1	1.16578	1	1	1.01187	1	1.41617	1.31656	1	1	1	1	1.32473
GO_AMIDE_BINDING_Up	1	1	1	1.83149	1	1	1.31712	1.08934	1	1.39724	1.37537	1	1	1.01778	1	1	1.10931	1.09334	1	1.48811	1	1	1	1	1	1	1.24055	1	1	1	1.50048	1.09365	1.31652	1	1	1	1	1.07595	1	1	1	1	1.26342	1.51363	1.42142	1.14595	1
GO_AMIDE_BIOSYNTHETIC_PROCESS_Down	1.40624	1	1.61937	1	1	1	1.2038	1	1	1	1	1	1	1	1	1	1	1	1	1	1	1	1	1.0721	1	1	1	1	1	1	1	1	1	1	1	1	1	1.41639	1	1	1	1	1	1	1	1	1
GO_AMIDE_BIOSYNTHETIC_PROCESS_Up	1	1	1	1.18459	1	1.68436	1	1.72084	1.52748	1.13274	1	1.30988	2.6352	2.05675	2.58557	1	1	1	1	1	1	2.17897	1	1	1	1	1	1	1	1.18064	1	1	1	1	1.41185	1	1	1	1	1	1.91762	1.54921	1.14485	1	1	1	1
GO_AMIDE_TRANSPORT_Down	1	1	1	1	1	1.36569	1	1.47175	1	1	1	1	1	1	1	1	1	1	1.27016	1	1	1	1.18451	1.80879	1	1	1	1.29675	1.06276	1	1	1.43915	1	1.0048	1.60959	1.76645	1	1	1	1.6885	1.48218	1.65664	1	1.01927	1	1	1.4515
GO_AMIDE_TRANSPORT_Up	1.02519	1.28527	1.01522	1	1.32613	1	1	1	1	1	1	1	1	1.18227	1	1	1.00893	1.20023	1	1.17165	1	1	1	1	1	1	1	1	1	1	1.10441	1	1	1	1	1	1.60256	1.53192	1.27755	1	1	1	1.17557	1	1	1	1
GO_AMINE_METABOLIC_PROCESS_Down	1.04752	1	1.50237	1	1	1.19073	1	1	1	1	1	1	1	1	1	1	1.34378	1	1.65592	1	1.68485	1	1	1.09662	1.07057	1	1	1	1	1	1	1	1	1.29716	1	1	1	1	1	1.30313	1.24185	1.32583	1	1	1	1	1.15201
GO_AMINE_METABOLIC_PROCESS_Up	1	1	1	1	1.39142	1	1	1	1	1.2213	1.36376	1.32302	1	1.48879	1	1.24147	1	1	1	1.05478	1	1	1	1	1	1	1.38305	1	1.25413	1.00257	1.23567	1.31819	1.41925	1	1	1.08233	1	1	1.24813	1	1	1	1	1.24062	1.01902	1.05417	1
GO_AMINO_ACID_ACTIVATION_Down	1	1	1	1	1.12353	1	1	1	1	1	1	1	1	1	1	1	1	1	1	1	1	1	1	1	1	1	1	1	1	1	1	1	1	1	1.01276	1.3545	1	1.88587	1	1	1	1	1	1	1	1	1
GO_AMINO_ACID_ACTIVATION_Up	1	1.11534	1	1	1	1.18196	1	1.74828	1	1	1	1	1.67641	1.18846	1.54553	1	1	1	1	1	1	1.37401	1	1	1.12088	1.12814	1	1.11383	1.23458	1.95351	1	1	1.37048	1	1	1	1	1	1.04392	1	1.87554	1.48508	1.1708	1	1	1	1
GO_AMINO_ACID_BINDING_Down	1	1	1	1.13931	1	1	1	1	1	1	1	1	1.12907	1	1	1	1	1	1.1787	1	1.03505	1	1.19794	1	1.25733	1	1.19942	1.15001	1	1	1	1	1	1	1	1	1	1	1	1	1.62487	1.50868	1	1.27172	1	1	1.19095
GO_AMINO_ACID_BINDING_Up	1.16317	1.2712	1	1	1.12577	1	1	1	1	1	1.40568	1	1	1.20598	1	1.08975	1	1.38917	1	1	1	1.1445	1	1	1	1	1	1	1	1	1	1	1	1	1	1.2215	1.09067	1.06317	1	1	1	1	1	1	1.17587	1.45304	1
GO_AMINO_ACID_TRANSMEMBRANE_TRANSPORT_Down	1.16583	1	1.27784	1	1	1	1	1.10061	1.25703	1	1	1	1.74705	1	1	1	1	1	1	1	1	1	1	1.23748	1.64658	1	1.04556	1.42978	1.3949	1	1	1.08924	1	1	1.16888	1.2522	1	1.08041	1	1.20702	1	1	1	1	1	1	1
GO_AMINO_ACID_TRANSMEMBRANE_TRANSPORT_Up	1	1	1	1	1	1	1	1	1	1	1.2381	1	1	1.33179	1	1.3649	1	1.43166	1	1.59014	1.63364	1.34769	1	1	1	1	1	1	1	1	1.55602	1	1.04367	1	1	1	1	1	1.0453	1	1	1	1	1	1.09656	1.27095	1
GO_AMINO_ACID_TRANSMEMBRANE_TRANSPORTER_ACTIVITY_Down	1.34923	1	1.46461	1.0975	1	1	1	1	1.47989	1	1	1	1.67737	1	1	1	1.03685	1	1.17849	1	1	1	1	1.4832	1.65904	1	1	1.53313	1.30851	1	1	1.19381	1	1	1.27044	1.32459	1	1.19775	1	1.30491	1	1	1.00731	1.32772	1	1	1.02568
GO_AMINO_ACID_TRANSMEMBRANE_TRANSPORTER_ACTIVITY_Up	1	1.02646	1	1	1	1	1	1	1	1	1	1	1	1.46903	1	1.62316	1	1.74015	1	1.68073	1.54439	1.67639	1	1	1	1	1	1	1	1	1.72667	1	1.27825	1	1	1	1	1	1.30347	1	1	1	1	1	1	1.23596	1
GO_AMINO_ACID_TRANSPORT_Down	1.1272	1	1.41703	1	1	1	1	1.5225	1.30792	1	1	1	1.51652	1	1	1	1.02653	1	1.09407	1	1	1	1	1.47656	1.37032	1	1	1.5877	1.59272	1.14693	1	1.37278	1	1.12161	1.54237	1.61494	1	1.42557	1	1.15089	1	1	1	1.48798	1	1	1.04387
GO_AMINO_ACID_TRANSPORT_Up	1	1.0995	1	1	1	1.07384	1	1	1	1	1.19603	1	1	1.07985	1	1.27977	1	1.34165	1	1.5134	1.39568	1.37122	1	1	1	1	1	1	1	1	1.65237	1	1.34225	1	1	1	1	1	1	1	1	1	1	1	1	1.06502	1
GO_AMINO_SUGAR_METABOLIC_PROCESS_Down	1	1	1	1	1	1	1	1	1.29144	1	1	1	1	1	1	1	1	1	1	1	1	1	1	1	1	1	1	1	1.36951	1.00106	1	1	1	1	1.17427	1	1	1	1	1	1	1	1.10105	1	1	1	1
GO_AMINO_SUGAR_METABOLIC_PROCESS_Up	1	1	1	1	1.03287	1	1.09948	1	1	1	1.23085	1	1	1.21467	1	1	1.13964	1	1	1	1	1	1.36199	1.36139	1	1	1	1	1	1	1	1	1.76976	1.31937	1	1	1.10682	1	1.03609	1	1.21411	1	1	1.25127	1	1	1.954
GO_AMINOGLYCAN_BIOSYNTHETIC_PROCESS_Down	1.12821	1.05226	1.03153	1.33608	1	1.14696	1	1	1.2141	1	1	1.51671	1.63536	1	1.44085	1.08298	1	1	1	1	1	1	1.17704	1.17942	1.10296	1.31198	1	1.23269	1.15993	1.06183	1	1	1.29102	1	2.25625	1	1	1	1	1	1	1	1	1	1	1	1.14176
GO_AMINOGLYCAN_BIOSYNTHETIC_PROCESS_Up	1	1	1	1	1	1	1.75247	1.18543	1	1.16892	1.38303	1	1	1	1	1	1.61515	1.45911	1	1.78044	1.64918	1.21655	1	1	1	1	1.07356	1	1	1	1.93887	1.34567	1	1.24528	1	1.07956	1	1.27591	1.13397	1.44271	1	1.04588	1.29395	1.64088	1.47538	1.06153	1
GO_AMINOGLYCAN_CATABOLIC_PROCESS_Down	1.37981	1.33016	1.31512	1.38031	1	1.5687	1	1	1.89434	1	1	1.47522	1.142	1	1	1	1	1	1.44353	1	1	1	1.143	1.21243	1	1.39496	1	1	1	1.16914	1	1	1.1462	1	2.17176	1	1.27322	1	1	1	1	1	1	1	1	1	1.19336
GO_AMINOGLYCAN_CATABOLIC_PROCESS_Up	1	1	1	1	1.27875	1	1.69959	1.13242	1	1.1019	1.27391	1	1	1.38181	1	1.82345	1.25657	2.13839	1	1.91846	1.79523	1.72204	1	1	1	1	1.79964	1	1.46555	1	2.09014	1	1	1.07265	1	1	1	1.03067	1	1.11408	1	1.11488	1	1.74505	1.64996	1	1
GO_AMINOGLYCAN_METABOLIC_PROCESS_Down	1.07725	1.03799	1.08841	1.35777	1	1.23368	1	1	1.51686	1	1	1.50718	1.6822	1	1.42948	1	1	1	1	1	1	1	1.2004	1.3141	1	1.46901	1	1.16319	1	1	1	1	1.14626	1	2.20926	1	1	1	1	1	1.22679	1	1	1	1	1	1.02328
GO_AMINOGLYCAN_METABOLIC_PROCESS_Up	1	1	1	1	1	1	1.77788	1.24908	1	1.08346	1.29783	1	1	1	1	1.0991	1.54151	1.67786	1	1.75002	1.80764	1.19104	1	1	1	1	1.47386	1	1	1	1.93909	1.22821	1	1.36355	1	1	1	1.10851	1.13838	1.40463	1	1.05396	1.20419	1.63904	1.56164	1.36468	1
GO_AMINOPEPTIDASE_ACTIVITY_Down	1	1	1	1.17651	1	1.50407	1	1	1.50027	1	1	1	1.46778	1	1	1	1	1	1.23725	1	1	1	1	1.50654	1	1	1.16878	1.247	1	1	1	1	1	1	1	1.32045	1	1	1	1.66342	1.31458	1.52045	1	1	1	1	1
GO_AMINOPEPTIDASE_ACTIVITY_Up	1	1	1	1	1.33337	1	1	1	1	1	1	1	1	1	1	1	1	1	1	1.71303	1.12151	1	1	1	1	1	1	1	1.24697	1.56007	1	1.10487	1.63016	1	1	1	1.19582	1	1	1	1	1	1.10239	1.34998	1.35812	1.48163	1
GO_AMMONIUM_ION_BINDING_Down	1	1	1	1	1	1	1	1.25576	1	1	1	1	1.72829	1	1.08918	1.55049	1	1	1	1	1	1	1	1	1.53612	1	1	1	1.1273	1.51819	1	1	1	1.06047	1	1.00155	1	1	1	1.12425	1.76448	1.96423	1	1	1	1	1
GO_AMMONIUM_ION_BINDING_Up	1	1	1	1	1	1	1	1	1.16957	1	1.87156	1.7457	1	1.66982	1	1	1.6197	1.42433	1	1	1.05288	1.16252	1	1.10145	1	1.01038	1	1	1	1	1.88729	1.60576	1	1	1.38966	1	2.12837	1	1	1	1	1	1	1	1.13556	1.13751	1
GO_AMMONIUM_ION_METABOLIC_PROCESS_Down	1.22243	1	1.46467	1	1	1.32007	1	1	1	1	1	1	1	1	1	1	1.51339	1	1.50936	1	1.4906	1	1	1.19451	1.33626	1	1	1.08003	1	1	1	1	1	1.29855	1	1	1	1	1	1.41908	1.22879	1.2893	1	1	1	1	1
GO_AMMONIUM_ION_METABOLIC_PROCESS_Up	1	1	1	1	1.24876	1	1	1	1	1.40196	1.5143	1.49092	1	1.88899	1.26816	1.49023	1	1	1	1	1	1.14939	1	1	1	1.04215	1.44758	1	1	1.04516	1.38617	1.58098	1.4629	1	1.09546	1.18334	1.58902	1	1	1	1	1	1	1	1	1	1
GO_AMMONIUM_TRANSPORT_Down	1	1.04833	1	1	1	1	1	1	1	1	1	1	1.01109	1	1	1	1.15958	1	1.54621	1	1.28989	1	1.07526	1.16673	1.50683	1.7831	1	1.16981	1.10085	1	1	1	1	1.39608	1	1	1	1	1.07042	1	1.28759	1.14364	1	1	1	1	1
GO_AMMONIUM_TRANSPORT_Up	1	1	1	1	1.56979	1	1.29922	1	1.449	1.16858	1.30492	1.23316	1	1.5926	1.31067	1.17718	1	1.00976	1	1.16996	1	1.21958	1	1	1	1	1.21856	1	1	1	1.38631	1.49267	1	1	1.00027	1.16956	1.79721	1	1	1.45757	1	1	1	1.61244	1.62737	1	1
GO_AMPA_GLUTAMATE_RECEPTOR_COMPLEX_Down	1	1	1	1	1.03669	1	2.41012	1.4706	1.45485	1.46263	1	1	1.06422	1.10006	1.26174	1.51566	1	1	1	1.90467	1.34584	1.57026	1	1.14426	1.93124	1	1	1.63412	1.49925	1	1	1.07488	1	1	1.38383	1	1	1	1	1.57488	1.21745	1.4423	1	1.66274	1	1	1
GO_AMPA_GLUTAMATE_RECEPTOR_COMPLEX_Up	1	1	1	1	1	1	1	1	1	1	1	1	1	1	1	1	1.37482	1	1.27581	1	1	1	1	1	1	1	1	1	1	1	1	1	1	1	1	1	1	1	1	1	1	1	1	1	1	1.07341	1
GO_ANAPHASE_PROMOTING_COMPLEX_DEPENDENT_CATABOLIC_PROCESS_Down	1	1	1	1.02747	1.72737	1	1	1	1	1	1.41238	1	1	1	1	1	1	1	1	1	1	1	1	1	1	1	1	1	1	1	1	1	1	1	1.73024	1.81007	1	1.39244	1.5855	1	1	1	1	1	1.25471	1	1
GO_ANAPHASE_PROMOTING_COMPLEX_DEPENDENT_CATABOLIC_PROCESS_Up	1	1	1	1	1	1.09577	1	2.35287	1.59092	1	1	1.00921	2.55727	1.40054	2.32919	1	1	1	1	1	1	2.05302	1	1	1.89912	1	1	1.17613	1.08835	1.92804	1	1	1.07985	1	1	1	1	1	1	1	1	1.43753	1	1	1	1	1.79266
GO_ANAPHASE_PROMOTING_COMPLEX_Down	1	1	1	1.16855	1	1	1	1	1	1.04424	1.51602	1	1	1	1	1	1	1	1	1	1	1	1	1	1	1	1	1	1	1	1	1	1	1	1	1	1	1.38394	1	1	1	1	1	1	1	1	1
GO_ANAPHASE_PROMOTING_COMPLEX_Up	1.32039	1.3676	1	1	1	1	1	1.79318	1.03801	1	1	1	1.61183	1	1.35516	1	1	1	1	1	1	1.36888	1	1	1.91373	1	1.19517	1.29618	1	1	1	1	1	1	1	1	1	1	1	1	1.04987	1.04064	1.12318	1	1	1	1
GO_ANATOMICAL_STRUCTURE_FORMATION_INVOLVED_IN_MORPHOGENESIS_Down	1	1	1.11088	1	1	1.706	1	1.03629	1.12553	1	1.45677	1.57367	1.4394	1.17573	1.24791	1	1	1	1.30424	1	1	1	1	1	1	1	1	1	1	1.72262	1	1.21079	1.34426	1.13326	1	1	1	1	1	1	1.83954	1.43786	1	1	1	1	1.24708
GO_ANATOMICAL_STRUCTURE_FORMATION_INVOLVED_IN_MORPHOGENESIS_Up	1	1	1	1.12119	1.24096	1	1.81216	1	1	1.12421	1	1	1	1	1	1.36213	1.19489	1.59692	1	1.65764	1.58233	1.20862	1	1	1.49887	1	1	1	1.11447	1	1.30063	1	1	1	1.24325	1.40707	1.0458	1.39181	1.21917	1.41118	1	1	1.26243	1.77123	1.52404	1.12832	1
GO_ANATOMICAL_STRUCTURE_HOMEOSTASIS_Down	1	1	1	1	1	1.21343	1	1	1	1.15732	1.1065	1.11962	1	1	1	1	1	1	1.06715	1	1	1	1	1	1	1	1	1	1	1.07822	1	1	1	1.03043	1	1	1	1	1	1	1	1	1	1	1	1	1
GO_ANATOMICAL_STRUCTURE_HOMEOSTASIS_Up	1	1	1	1	1.17263	1	1.17356	1	1	1	1	1	1	1	1	1	1.64706	1.98723	1	1.26723	1.11896	1.16352	1	1.03462	1.26411	1	1	1	1.06191	1	1	1	1.22724	1	1	1	1	1	1	1	1.10074	1	1	1.42172	1.11825	1.13944	1
GO_ANATOMICAL_STRUCTURE_MATURATION_Down	1.07851	1.26139	1	1	1	1.36423	1	1.65765	1.61243	1	1.64576	1	1	1	1	1	1	1	1	1	1	1	1	1	1.29176	1	1	1	1	1	1	1	1	1.3298	1.28136	1	1.36465	1	1	1	1	1	1	1	1	1	1
GO_ANATOMICAL_STRUCTURE_MATURATION_Up	1	1	1	1.1226	1.49992	1	1.77221	1	1	1.19555	1	1.3816	1.4015	1.14817	1.25544	1.16788	1	1.3646	1	1.63837	1.8198	1.65262	1	1	1	1	1	2.55445	2.48583	1	1.51538	1	1.09268	1	1	1.0982	1	1	1	1.26593	1	1.14128	1	1.31942	1.32623	1.01091	1
GO_ANCHORED_COMPONENT_OF_MEMBRANE_Down	1	1	1.05538	1	1	1.21677	1	1	1.12156	1.08898	1	1.49263	1	1	1	1.39253	1	1.3595	1.58259	1	1.24207	1	1.21949	1.25167	1.7068	1	1	1.3516	1.40353	1.02832	1.03606	1.52605	1.12594	1.46671	1.66822	1.63681	1	1	1	1	1.83636	1.52466	1	1	1	1	1
GO_ANCHORED_COMPONENT_OF_MEMBRANE_Up	1.09838	1.37195	1	1.57613	1.42638	1	1	1	1	1	1.05511	1	1	1.38498	1	1	1.05092	1	1	1.40339	1	1	1	1	1	1.08098	1.55901	1	1	1	1	1	1	1	1	1	1	1.56317	1.82662	1	1	1	1.19634	1.12813	1.04364	1	1.27566
GO_ANCHORED_COMPONENT_OF_PLASMA_MEMBRANE_Down	1	1	1	1	1	1	1	1	1	1	1	1.47787	1	1	1	1	1.54051	1.39085	1.80645	1	1.46958	1	1.04659	1	1	1	1	1	1	1	1	1.35476	1.05938	1	1	1	1	1	1	1	1	1	1	1	1	1	1
GO_ANCHORED_COMPONENT_OF_PLASMA_MEMBRANE_Up	1	1	1	1	1	1	1	1	1	1	1	1	1.1381	1	1.04451	1.10069	1	1	1	1.64609	1	1	1	1	1	1	1	1	1	1	1	1	1	1	1	1	1	1	1	1	1	1	1	1	1	1	1
GO_ANCHORING_JUNCTION_Down	1	1	1	1	1	1.13496	1	1.09517	1.04932	1	1.01235	1.03163	1.19832	1	1	1	1.01117	1	1.31337	1	1	1	1	1	1	1.06229	1	1	1.07532	1.50425	1	1	1	1.29536	1	1	1	1	1.04219	1	1.39437	1.34307	1	1	1	1	1.50631
GO_ANCHORING_JUNCTION_Up	1	1.10044	1	1	1	1	1.74053	1	1	1.00145	1	1	1	1	1	1.2793	1	1.35346	1	1.59613	1.32821	1.00533	1	1	1.32627	1	1	1	1	1	1.41978	1	1	1	1.21929	1.62555	1	1.42103	1	1	1	1	1.45172	1.90997	1.44759	1.08391	1
GO_ANDROGEN_RECEPTOR_BINDING_Down	1	1.03897	1	1	1.374	1	1	1.46603	1	1	1	1.0646	1.34387	1.20208	1.46497	1.22754	1	1.2116	1	1	1	1.51098	1	1	1	1	1	1	1	1	1	1	1	1	1.18664	1	1	1	1	1	1.23896	1	1	1	1	1	1
GO_ANDROGEN_RECEPTOR_BINDING_Up	1	1	1	1	1	1	1	1	1	1	1	1	1	1	1	1	1.16933	1	1.01495	1	1	1	1	1	1	1.04849	1	1	1	1	1	1	1.03745	1	1	1	1	1	1	1	1	1	1	1.03974	1	1	1
GO_ANDROGEN_RECEPTOR_SIGNALING_PATHWAY_Down	1	1.00428	1	1	1.32964	1	1	1.32318	1	1	1.05107	1	1.29743	1.67224	1.53145	1.0668	1	1	1	1	1	1.57327	1	1	1	1	1	1	1	1.21775	1	1.23447	1	1	1.45362	1	1	1.25677	1.32638	1	1.14993	1	1	1	1	1	1
GO_ANDROGEN_RECEPTOR_SIGNALING_PATHWAY_Up	1	1	1	1	1	1	1	1	1	1	1	1	1	1	1	1	1	1	1.00389	1	1.08554	1	1	1	1	1.21375	1	1	1.03958	1	1	1	1	1	1	1	1.06285	1	1	1	1	1	1	1	1	1	1
GO_ANGIOGENESIS_Down	1.16241	1	1.74668	1	1	1.73847	1	1	1.58886	1	1.19966	1	1.44395	1	1.10053	1	1	1	1.05943	1	1	1	1	1	1	1	1	1	1	1.65692	1	1.34996	1.3147	1.11531	1.12936	1	1.02943	1	1	1.36416	1.76816	1.70269	1	1	1	1	1.18249
GO_ANGIOGENESIS_Up	1	1.09155	1	1.07508	1.356	1	1.87552	1.11401	1	1.38551	1	1	1	1	1	1.16283	1.40784	1.75197	1	1.91988	2.0483	1.4203	1	1	1.5838	1	1.21513	1	1	1	1.55974	1	1	1	1	1.32546	1	1.21183	1.28127	1	1	1	1.42794	2.00903	1.67692	1.28671	1
GO_ANION_CATION_SYMPORTER_ACTIVITY_Down	1	1	1	1	1	1.1629	1	1.10134	1.30028	1	1	1.45535	1.94584	1	1	1	1	1	1.38369	1	1	1	1	1.2061	1.15586	1	1	1.07451	1	1.23018	1	1	1	1	1.73219	1.19379	1	1	1	1	1	1	1.02044	1.81625	1	1	1
GO_ANION_CATION_SYMPORTER_ACTIVITY_Up	1	1	1	1	1.00881	1	1	1	1	1.04632	1.85539	1	1	1.51631	1	1.90254	1.00038	2.19889	1	1.89932	1.65856	1.83885	1	1	1	1	1.58058	1	1.06831	1	1.98846	1	1.14036	1	1	1	1	1	1	1	1	1	1	1	1	1.61545	1
GO_ANION_CHANNEL_ACTIVITY_Down	1	1	1	1	1	1	1.08074	1	1.37868	1	1	1	1.70567	1.14429	1.60374	1	1	1	1.27645	1	1.48075	1	1	1	1.66162	1	1	1.00872	1	1	1	1	1	1	1	1.39616	1.29599	1.19245	1.23385	1	1.37727	1	1	1.7238	1	1	1
GO_ANION_CHANNEL_ACTIVITY_Up	1	1	1	1	1.50252	1.23104	1	1	1	1	1.31394	1	1	1	1	1.3665	1.05737	1.32141	1	1	1	1.10913	1.06807	1	1	1	1	1	1.43013	1.49706	1.10276	1	1.31686	1	1.18102	1	1	1	1	1.03291	1	1	1	1	1.29148	1.80042	1
GO_ANION_HOMEOSTASIS_Down	1.34403	1	1.5734	1	1	1.21363	1	1	1.09776	1	1.30541	1	1	1	1	1	1.24758	1	1	1	1	1	1	1.41189	1	1	1	1.19792	1.22234	1	1	1	1	1	1	1	1	1	1	1.21832	1.23888	1.03745	1	1	1	1	1.08554
GO_ANION_HOMEOSTASIS_Up	1	1	1	1	1.52056	1	1	1.07844	1	1	1	1.13674	1.34637	1.24891	1.23798	1	1	1	1	1.13782	1	1.09848	1	1	1	1	1	1	1	1	1	1	1	1	1.07224	1	1.14994	1	1	1	1	1	1	1	1	1	1
GO_ANION_TRANSMEMBRANE_TRANSPORT_Down	1.12448	1	1.34441	1	1	1	1	1.21774	1.41338	1	1	1.22767	2.06032	1	1.62793	1	1.02231	1	1.5864	1	1	1	1	1	1.25662	1	1	1.1125	1	1	1	1	1	1	1.10614	1.29295	1.0947	1	1.28764	1.10073	1.16687	1.12505	1.13071	1.29804	1	1	1
GO_ANION_TRANSMEMBRANE_TRANSPORT_Up	1	1	1	1.09426	1.32037	1	1	1	1	1	1.55432	1	1	1	1	1.57254	1	1.50447	1	1.56976	1.09768	1.0575	1	1	1	1	1.06823	1	1.03886	1.24845	1.81967	1.40703	1.24087	1	1	1	1	1.05897	1	1	1	1	1	1	1.18063	1.64877	1.10622
GO_ANION_TRANSMEMBRANE_TRANSPORTER_ACTIVITY_Down	1.22191	1	1.33976	1	1	1	1	1.08284	1.72582	1	1	1.32874	1.93696	1	1.41639	1	1	1	1.59753	1	1	1	1	1	1.20567	1	1	1.1479	1	1	1	1	1	1	1.32504	1.31417	1.07117	1	1	1.24139	1.19584	1.30426	1.03892	1.50243	1	1	1.02369
GO_ANION_TRANSMEMBRANE_TRANSPORTER_ACTIVITY_Up	1	1.12501	1	1.06443	1.3948	1	1	1	1	1	1.39981	1	1	1.05033	1	1.7538	1	1.76948	1	1.60553	1.14696	1.22104	1	1	1	1	1.08235	1	1.12232	1.2353	2.02087	1.31761	1.4353	1	1	1	1	1.04221	1	1	1	1	1	1	1.08573	1.63856	1
GO_ANION_TRANSPORT_Down	1.10477	1	1.32451	1	1	1	1	1.30274	1.36485	1	1	1.03048	1.82928	1.02798	1.45177	1	1	1	1.64021	1	1.13112	1	1	1.10437	1	1	1	1	1	1	1	1	1	1.12281	1.05361	1.16395	1	1	1	1.11101	1.33256	1.37271	1.20002	1.28579	1	1	1.19824
GO_ANION_TRANSPORT_Up	1	1.0338	1	1.07557	1.43418	1	1	1	1	1	1.55486	1	1	1	1	1.57749	1.33865	2.08758	1	1.50701	1	1.04946	1	1	1.06397	1	1.33755	1	1	1.02707	2.06334	1.3274	1.48503	1	1	1	1	1.05666	1.08678	1	1	1	1	1	1.06122	1.54849	1
GO_ANTERIOR_POSTERIOR_AXIS_SPECIFICATION_Down	1.34004	1.44403	1.21518	1	1	1	1	1	1.03011	1	1.20415	1	1	1	1	1	1.30189	1	1.44877	1	1.10572	1	1	1.54493	1	1	1	1	1	1.64398	1	1.12169	1.08493	1	1	1	1	1	1	1	1.40913	1	1	1	1	1	1
GO_ANTERIOR_POSTERIOR_AXIS_SPECIFICATION_Up	1	1	1	1	1.16402	1	1.6807	1	1	1.16034	1	1	1.18664	1.32442	1.08837	1.54705	1	1.17823	1	1.36438	1	1.31388	1	1	1	1	1	1	1.27791	1	1	1	1	1	1	1.52954	1.27099	1	1	1.31649	1	1.53838	1	1.73372	1.65328	1	1.02981
GO_ANTERIOR_POSTERIOR_PATTERN_SPECIFICATION_Down	1.40491	1.45545	1	1.74025	1	1.88681	1	1	1.05084	1.18479	1.8507	1.6947	1.35767	1.24376	1	1	1.43253	1	1.30946	1	1	1	1	1	1	1.54508	1.96629	1.53201	1	1.98047	1	1.72189	1.55569	1.16207	1.56027	1	1	1	1	1	1.95498	1	1	1	1	1	1.429
GO_ANTERIOR_POSTERIOR_PATTERN_SPECIFICATION_Up	1	1	1	1	1.01739	1	1.7972	1.1702	1	1	1	1	1	1	1.34627	1.06796	1	1.69332	1	1.65515	1.42197	1.89134	1	1	1.03393	1	1	1	1	1	1.26554	1	1	1	1	1.36265	1.26618	1	1.11237	1.76566	1	1.02398	1	1.50559	1.3693	1.03154	1
GO_ANTEROGRADE_AXONAL_TRANSPORT_Down	1	1	1	1	1.18269	1	1.55729	1.12218	1	1	1	1	1	1	1	1.22839	1	1	1	1	1	1	1.73883	1	1	1	1	1.20279	1	1.00571	1.15578	1.03785	1.04924	1.0729	1	1	1	1	1	1	1	1	1	1.29882	1	1	1
GO_ANTEROGRADE_AXONAL_TRANSPORT_Up	1	1	1	1	1	1.43034	1	1	1.17271	1	1	1	1.07285	1.32254	1.37734	1	1	1	1.00777	1	1	1.23227	1	1	1	1	1	1	1	1	1	1	1	1	1	1	1	1	1	1	1	1	1	1	1	1	1
GO_ANTIGEN_BINDING_Down	1.1013	1	1.30293	1	1	1	1	1	1.21915	1	1	1	1	1	1	1	1.02153	1	1.38224	1	1	1	1.21208	1	1.19206	1.28767	1.25209	1.22215	1	1.28605	1	1	1	1.55998	1.63516	1	1	1.39472	1	1	1.33123	1.41075	1	1	1	1	1
GO_ANTIGEN_BINDING_Up	1	1	1	1	1.2187	1	1.13981	1	1	1.12561	1.25234	1.07339	1	1.27461	1	1.53237	1	1.48775	1	1.51258	1.02491	1.21869	1	1	1	1	1	1	1	1	1.21534	1	1.21999	1	1	1.00176	1.03157	1	1	1	1	1	1.45011	1.45759	1.56122	1.3073	1
GO_ANTIGEN_PROCESSING_AND_PRESENTATION_Down	1.01872	1.00964	1	1	1	1	1.39152	1	1	1	1	1	1	1	1	1	1	1	1.00774	1	1	1	1	1	1	1	1	1	1	1	1	1	1	1.07219	1.21513	1	1	1	1	1	1.54639	1.33902	1	1	1	1	1
GO_ANTIGEN_PROCESSING_AND_PRESENTATION_OF_EXOGENOUS_PEPTIDE_ANTIGEN_VIA_MHC_CLASS_I_Down	1.00453	1	1.00903	1	1	1	1	1	1	1	1	1	1	1	1	1	1	1	1	1	1	1	1	1	1	1	1.00775	1.01023	1	1	1	1.25584	1.01875	1	1.92514	1.05319	1	1	1	1	1.4274	1	1	1	1	1	1
GO_ANTIGEN_PROCESSING_AND_PRESENTATION_OF_EXOGENOUS_PEPTIDE_ANTIGEN_VIA_MHC_CLASS_I_Up	1	1	1	1.42724	1.13574	1.26863	1.32333	1.95602	1.38458	1.97463	1	2.20528	2.49484	2.10009	2.44227	1	1	1	1	1	1	2.26867	1	1	1	1	1	1	1	1.64269	1	1	1	1	1	1	1	1	1	1	1	1	1	1	1	1.04136	1.3829
GO_ANTIGEN_PROCESSING_AND_PRESENTATION_OF_PEPTIDE_ANTIGEN_Down	1	1.00285	1	1	1	1	1	1	1	1	1	1	1	1	1	1	1	1	1.099	1	1	1	1	1	1	1	1	1	1	1	1	1	1	1.09788	1.23317	1	1	1	1	1	1.59348	1.30689	1	1	1	1	1
GO_ANTIGEN_PROCESSING_AND_PRESENTATION_OF_PEPTIDE_ANTIGEN_Up	1	1	1	1	1	1.13608	1	1.01609	1.15697	1.06375	1	1.31418	1.87776	1.54066	1.92336	1	1.12408	1	1	1	1	1.73699	1	1	1	1	1	1	1	1.5033	1	1	1.10655	1	1	1	1	1	1	1	1	1	1	1	1	1.41958	1.12187
GO_ANTIGEN_PROCESSING_AND_PRESENTATION_OF_PEPTIDE_ANTIGEN_VIA_MHC_CLASS_I_Down	1	1	1	1	1	1	1	1	1	1	1	1	1	1	1	1	1	1	1.17495	1	1	1	1	1.03928	1	1	1	1.25693	1	1	1	1	1	1.04683	1.68497	1	1	1	1	1	1.80885	1.63081	1	1	1	1	1
GO_ANTIGEN_PROCESSING_AND_PRESENTATION_OF_PEPTIDE_ANTIGEN_VIA_MHC_CLASS_I_Up	1	1	1	1.04611	1.19914	1	1.44539	1.74997	1.17838	2.00577	1	2.00918	2.05353	2.04859	2.31581	1	1	1	1	1.15939	1	2.12205	1	1	1	1	1	1	1	1.4984	1	1	1	1	1	1	1	1	1	1	1	1	1	1.3482	1	1.56151	1.25361
GO_ANTIGEN_PROCESSING_AND_PRESENTATION_OF_PEPTIDE_OR_POLYSACCHARIDE_ANTIGEN_VIA_MHC_CLASS_II_Down	1.01648	1.25961	1	1.26839	1.8684	1	1	1.07701	1	1.29203	1	1.00495	1	1	1	1.26046	1	1	1	1	1	1	1	1	1	1	1	1	1	1	1	1	1	1	1	1	1	1	1	1	1	1	1	1	1	1	1
GO_ANTIGEN_PROCESSING_AND_PRESENTATION_OF_PEPTIDE_OR_POLYSACCHARIDE_ANTIGEN_VIA_MHC_CLASS_II_Up	1	1	1	1	1	1.36315	1	1	1	1	1	1	1	1	1	1	1.22476	1	1	1	1	1	1	1	1	1	1.20084	1	1	1	1	1	1.47583	1	1	1	1	1	1	1	1	1	1	1	1	1	1
GO_ANTIGEN_PROCESSING_AND_PRESENTATION_Up	1	1	1	1	1	1.32145	1	1.1684	1.30327	1.07861	1.81532	1.26398	1.81798	1.58594	1.87018	1	1.08712	1	1	1.04047	1	1.69309	1	1	1	1	1	1	1	1.30378	1	1	1.21419	1	1	1	1	1	1.26723	1	1	1	1	1.13383	1	1.40262	1.17055
GO_ANTIGEN_RECEPTOR_MEDIATED_SIGNALING_PATHWAY_Down	1	1	1	1	1	1	1	1	1	1	1	1	1	1	1	1	1	1	1	1	1	1	1	1	1	1.01094	1	1	1	1	1	1	1	1	1	1	1	1	1	1.10781	1	1	1	1	1	1	1
GO_ANTIGEN_RECEPTOR_MEDIATED_SIGNALING_PATHWAY_Up	1	1	1	1	1.13822	1.2316	1	1.04667	1.02303	1.28449	1	1.05304	1.88022	1.30653	1.62277	1	1	1	1	1	1	1.35097	1	1	1	1	1	1	1	1	1	1.08236	1	1	1.09114	1	1.18126	1	1	1	1	1	1	1	1	1.22625	1.04324
GO_ANTIPORTER_ACTIVITY_Down	1	1	1.06864	1	1	1	1	1.47412	1.43634	1.17519	1	1.60945	2.05085	1	1.53328	1	1	1	1	1	1	1	1	1.40338	1.08921	1	1	1	1	1	1	1	1	1	1.22674	1	1	1	1	1.01576	1	1.04613	1.37562	1	1	1	1
GO_ANTIPORTER_ACTIVITY_Up	1	1.32782	1	1.74096	1.43854	1.25464	1	1	1	1	1.48381	1	1	1	1	1.25414	1.49221	1.8014	1	1.7348	1.76611	1.41264	1.40106	1	1	1	1.27798	1.11989	1.55889	1.01047	2.01315	1.09921	1	1	1	1.02115	1	1.05902	1.13924	1	1.08065	1	1	1.30295	1.60278	1.61743	1.3809
GO_AORTA_DEVELOPMENT_Down	1	1	1	1	1	1.61031	1	1	1.29975	1.25541	1.90749	1.87284	1	1	1	1	1	1	1	1	1	1	1	1.05686	1	1.68307	1.34681	1	1	1.99351	1	1	1.11484	1.03298	1.31938	1	1.42758	1	1	1	1.20684	1	1	1	1	1.11496	1.01758
GO_AORTA_DEVELOPMENT_Up	1	1	1	1.11875	1.13869	1	1.96248	1.2463	1	1	1	1	1.0759	1	1.00639	1.28788	1	1.57961	1.69982	1.75249	2.00135	1.57653	1	1	1.3581	1	1	1	1.0524	1	1.48338	1	1	1	1	1.92204	1	1	1	1.34647	1	1	1.07046	1.52787	1.33671	1	1
GO_AORTA_MORPHOGENESIS_Up	1	1	1	1	1	1	1.85556	1	1	1	1	1	1	1	1	1	1	1	1	1	1	1	1	1	1	1	1	1	1	1	1	1	1	1	1	1	1	1	1	1.46722	1	1	1	1	1	1	1
GO_AP_TYPE_MEMBRANE_COAT_ADAPTOR_COMPLEX_Down	1	1	1	1	1.52244	1	1	1	1	1	1	1	1	1	1	1	1	1	1	1	1	1	1	1	1	1	1	1	1	1	1	1	1	1.01756	1	1.01183	1	1	1	1.27946	1	1	1	1	1	1.17811	1
GO_AP_TYPE_MEMBRANE_COAT_ADAPTOR_COMPLEX_Up	1.65285	1.37298	1.39658	1	1	1.14038	1	1	1	1	1	1	1	1	1	1	1	1	1	1	1	1	1	1.0694	1	1.27516	1.63476	1	1	1	1	1	1	1	1.26255	1	1	1.09896	1	1	1	1	1	1	1	1	1
GO_APICAL_JUNCTION_ASSEMBLY_Down	1	1	1	1	1	1	1	1	1	1	1	1	1	1.14703	1	1	1.61885	1	1.42361	1	1.02581	1	1	1.10035	1	1	1	1	1	1.44395	1	1	1.52376	1	1	1	1	1.07177	1	1	1.44633	1.17238	1	1	1	1	1.05331
GO_APICAL_JUNCTION_ASSEMBLY_Up	1.15257	1	1.2329	1	1.08682	1	1.60014	1.08017	1	1	1	1	1	1	1	1.38464	1	1.09914	1	1.49015	1	1	1	1	1.33531	1	1	1.02859	1	1	1	1	1	1	1.25512	1	1.35194	1	1	1	1	1	1.06528	1.51129	1	1	1
GO_APICAL_JUNCTION_COMPLEX_Down	1.22429	1.31016	1	1.25455	1	1.38983	1	1.19934	1	1	1	1.26198	1.68064	1.38226	1.6765	1	1.30455	1	1.66698	1	1.21981	1.63787	1	1	1	1	1	1	1	1.68484	1	1	1.31131	1.03497	1	1	1	1	1.11725	1	1.78013	1.06971	1.0975	1	1	1	1.13137
GO_APICAL_JUNCTION_COMPLEX_Up	1	1	1.00911	1	1	1	1.60064	1	1	1	1	1	1	1	1	1.09537	1	1	1	1.4268	1	1	1	1	1.48468	1	1.04556	1	1	1	1.07046	1.11533	1	1	1.56444	1.68726	1	1	1	1	1	1	1	1.14857	1	1.08779	1
GO_APICAL_PART_OF_CELL_Down	1.1381	1	1.29754	1	1	1	1	1.41172	1.36546	1	1	1.09565	1.76735	1.09846	1.60069	1	1	1	1.72991	1	1.43013	1.25964	1.10838	1.17893	1	1.31071	1	1.30117	1	1.08067	1	1	1	1.36703	1	1	1	1	1	1.13104	1.98103	1.89108	1.13001	1	1	1	1.3248
GO_APICAL_PART_OF_CELL_Up	1	1	1	1.55038	1.55744	1	1.59633	1	1	1.03009	1	1	1	1	1	1.44589	1.07285	1.52833	1	1.40201	1	1	1	1	1	1	1.14073	1	1	1	1.65004	1.31223	1.19125	1	1.35087	1.41619	1.23358	1.1005	1.49702	1	1	1	1	1.65899	1.58244	1.77248	1
GO_APICAL_PLASMA_MEMBRANE_Down	1.21667	1	1.42074	1	1	1.06012	1	1.40076	1.51799	1	1	1	1.71937	1.03199	1.53732	1	1	1	1.81341	1	1.49041	1.20305	1.0305	1.18115	1	1.26317	1	1.22138	1	1	1	1	1	1.05456	1	1	1	1	1	1.29311	2.06425	2.07129	1.14941	1	1	1	1.31976
GO_APICAL_PLASMA_MEMBRANE_Up	1	1	1	1.75934	1.6623	1	1.65727	1	1	1.09823	1	1	1	1	1	1.51476	1.0951	1.51009	1	1.43933	1	1	1	1	1	1	1.18288	1	1	1	1.54928	1.33672	1.04896	1	1.34894	1.38066	1.29458	1.11437	1.33554	1	1	1	1	1.51912	1.52079	1.73166	1
GO_APOPTOTIC_CELL_CLEARANCE_Down	1	1	1	1	1	1	1	1	1	1	1	1	1.46297	1	1.06774	1	1	1	1.47058	1	1	1	1.08519	1.60016	1	1.09378	1	1	1	1.02442	1	1.04416	1	1	1	1	1	1	1	1	1.34048	1	1	1	1	1	1
GO_APOPTOTIC_CELL_CLEARANCE_Up	1	1	1	1	1.4748	1	1.74447	1	1	1.22706	1	1.06391	1	1	1	1	1	1	1	1.64086	1.37605	1	1	1	1.47495	1	1	1	1.28171	1	1	1	1	1	1	1	1	1	1	1	1	1	1	1.79874	1.55271	1.4396	1
GO_APOPTOTIC_MITOCHONDRIAL_CHANGES_Down	1	1	1	1	1.16291	1	1	1	1	1	1	1	1	1	1	1	1	1	1	1	1	1	1	1.33187	1	1	1	1	1	1	1	1	1	1	1.03357	1.00685	1	1	1	1	1	1	1	1.39379	1.2313	1	1
GO_APOPTOTIC_MITOCHONDRIAL_CHANGES_Up	1.27212	1.12382	1.12014	1	1	1	1	1	1.48166	1.22415	1	1.42382	1.24876	1.14759	1.3149	1	1	1	1	1.0227	1	1.19662	1	1	1	1	1.35373	1	1	1.19326	1	1	1	1.3659	1	1	1.21927	1	1	1	1	1	1	1	1	1	1
GO_APOPTOTIC_NUCLEAR_CHANGES_Down	1	1	1	1.21367	1	1.3229	1	1.06006	1	1.74485	1.7699	1	1	1.17336	1	1	1	1	1	1	1	1	1	1	1	1	1.13457	1	1	1	1	1	1	1	1	1	1	1	1	1	1	1.18397	1	1	1	1	1
GO_APOPTOTIC_NUCLEAR_CHANGES_Up	1	1	1	1	1	1	1	1	1	1	1	1	1	1	1	1	1	1	1	1.16118	1.19474	1	1	1	1.53218	1	1	1	1	1	1	1	1	1	1	1	1	1	1	1	1	1	1	1	1	1	1
GO_APOPTOTIC_SIGNALING_PATHWAY_Down	1.23878	1	1.42136	1	1	1.1291	1	1	1	1	1.38339	1	1	1.13231	1	1	1	1	1.03806	1	1	1	1	1	1	1	1	1	1	1	1	1	1	1	1	1.07745	1	1	1	1	1	1	1	1	1	1	1
GO_APOPTOTIC_SIGNALING_PATHWAY_Up	1	1	1	1	1.1132	1	1.28845	1.13997	1	1	1	1.04048	1	1	1	1.01626	1	1.15225	1	1.37438	1.29533	1.12935	1	1	1.11508	1	1	1	1.00289	1	1.15073	1	1	1.13769	1	1	1.05054	1.3022	1.09156	1	1	1	1.02318	1.23636	1	1	1
GO_APPENDAGE_DEVELOPMENT_Down	1.30701	1.37622	1.08506	1.80888	1	1.97403	1	1.11237	1.23709	1.40521	1.80569	1.93802	1.53565	1.50354	1	1.10457	1	1	1	1	1	1	1	1	1	1	1.33787	1	1	1.98218	1	1.45174	1.4346	1.28101	1.4802	1	1	1	1	1	1.42758	1	1	1	1	1	1.63446
GO_APPENDAGE_DEVELOPMENT_Up	1	1	1	1	1.10917	1	1.96457	1	1	1	1	1	1	1	1.16242	1	1.63648	1.67129	1	1.82792	1.90579	1.61583	1.15398	1	1.42992	1	1	1	1.08043	1	1.52064	1	1	1	1	1.29245	1.2487	1.26058	1.06867	2.20338	1	1.64692	1	1.83876	1.72773	1.00072	1
GO_ARACHIDONIC_ACID_METABOLIC_PROCESS_Down	1	1	1	1	1	1	1	1	1	1	1	1	1	1	1	1.03957	1	1	1	1	1	1	1	1	1	1	1	1	1	1	1	1.1988	1	1	1.95116	1	1	1	1	1	1	1	1	1	1	1	1
GO_ARACHIDONIC_ACID_METABOLIC_PROCESS_Up	1	1	1	1	1	1	1	1	1	2.10999	1	1.72468	1	1.51425	1	1	1.69584	1.33441	1	1.69828	1.73294	1.76086	1	1	1	1.06464	1.70663	1.38939	1.64696	1.47725	1.90241	1	1.37865	1	1	1	1	1	1	1	1	1	1	1	1.44146	1	1
GO_ARF_GUANYL_NUCLEOTIDE_EXCHANGE_FACTOR_ACTIVITY_Down	1	1	1	1	1	1	1.05394	1.34908	1	1	1	1	1.45528	1.30166	1.37524	1.13861	1	1.19819	1	1.38808	1.22641	1.83653	1	1	1.31718	1	1	1	1	1.45234	1	1	1	1	1	1	1	1	1	1	1	1	1	1	1	1	1
GO_ARF_GUANYL_NUCLEOTIDE_EXCHANGE_FACTOR_ACTIVITY_Up	1	1	1	1	1	1	1	1	1	1	1	1	1	1	1	1	1	1	1	1	1	1	1	1	1	1	1.42298	1	1	1	1	1	1	1	1	1.16969	1	1	1	1	1	1	1	1	1	1	1
GO_ARTERY_DEVELOPMENT_Down	1.13408	1	1.1859	1	1	1.82422	1	1	1.23332	1.19599	1.87571	1.6779	1.19572	1.10574	1.03618	1	1	1	1	1	1	1	1.17831	1.48124	1	1.88504	1.34613	1	1	1.78194	1	1	1.64981	1.28179	1	1	1.13778	1	1.18176	1	1.85338	1.5954	1	1	1	1	1.21521
GO_ARTERY_DEVELOPMENT_Up	1	1	1	1	1.31017	1	1.98027	1.31117	1	1	1	1	1	1	1	1.49034	1	1.70315	1	1.84039	1.8275	1.5788	1	1	1.63538	1	1	1	1.30498	1	1.49484	1	1	1	1.16497	2.11585	1	1	1	1.09271	1	1	1.19348	2.02304	1.62677	1	1
GO_ARTERY_MORPHOGENESIS_Down	1.38008	1	1.20894	1.06794	1	1.81213	1	1	1.51926	1.11551	1.93263	1.54143	1	1	1	1	1	1	1.13688	1	1	1	1	1.53202	1	1.84606	1.36463	1	1	1.86785	1	1	1.87486	1	1	1	1	1	1.35208	1	1.95916	1.60566	1	1	1	1.18391	1.51118
GO_ARTERY_MORPHOGENESIS_Up	1	1	1	1	1.46124	1	2.00721	1.20693	1	1	1	1	1.26488	1	1.30514	1.73204	1	1.70303	1	1.76123	1.58372	1.59218	1	1	1.46012	1	1	1	1.40829	1	1.64258	1	1	1	1.18086	1.94669	1	1	1	1.18527	1	1	1.38046	1.98859	1.63774	1	1
GO_ASPARTATE_FAMILY_AMINO_ACID_BIOSYNTHETIC_PROCESS_Down	1	1	1	1	1	1	1	1	1	1	1	1	1	1	1	1	1.1037	1	1	1	1	1	1	1	1	1	1.04451	1	1	1	1	1	1	1	1	1	1	1	1	1	1	1	1	1	1	1	1
GO_ASPARTATE_FAMILY_AMINO_ACID_BIOSYNTHETIC_PROCESS_Up	1	1	1	1	1	1	1.14736	1.72848	1	1.34872	1	1.51333	1.21534	1.29926	1.29148	1	1	1	1	1	1	1.08253	1	1	1.0915	1	1	1	1.16642	1	1	1	1	1	1	1	1	1	1	1	1.04102	1.23343	1	1	1	1	1
GO_ASPARTATE_FAMILY_AMINO_ACID_METABOLIC_PROCESS_Down	1	1	1	1.15026	1	1.10962	1	1	1	1	1	1	1	1	1	1	1.11039	1	1.38766	1.01929	1.46971	1	1	1	1	1	1	1.02685	1	1	1	1	1	1	1	1	1.08735	1	1	1	1	1	1	1	1	1	1
GO_ASPARTATE_FAMILY_AMINO_ACID_METABOLIC_PROCESS_Up	1.0073	1	1	1	1	1	1.01066	1.49475	1.05353	1.78839	1.38907	1.57673	1.3803	1.65717	1.57251	1	1	1	1	1	1	1	1	1	1.29065	1	1.10562	1	1	1.2559	1	1	1.07815	1	1	1	1	1	1.07699	1	1.09636	1.14999	1	1	1	1	1.2573
GO_ASSOCIATIVE_LEARNING_Down	1.10217	1	1.10266	1	1	1	1.66106	1.65502	1.10605	1.09878	1	1	1.34688	1.2106	1.18462	1.93048	1	1.84139	1	1.1579	1	1.54932	1.02951	1	1	1	1	1	1.36251	1.13304	1	1.05406	1	1	1.1938	1.11795	1.10742	1	1	1.58487	1.78895	1.90508	1	1.31077	1	1	1.53417
GO_ASSOCIATIVE_LEARNING_Up	1	1	1	1	1	1	1	1	1	1	1	1	1	1	1	1	1.57481	1	1.36334	1	1.0453	1	1	1	1	1.0753	1.46827	1	1	1	1	1	1	1	1	1	1	1.02455	1	1	1	1	1.30889	1	1.04787	1.21776	1
GO_ASTROCYTE_DIFFERENTIATION_Down	1.215	1	1.18445	1.55974	1	1.90091	1.10221	1	1	1	1	1	1	1	1	1	1.34532	1.06727	1	1	1	1	1	1	1	1	1	1	1	1.80615	1.07159	1	1	1.57706	1	1	1	1	1	1	1.04119	1	1.26801	1.24652	1.32898	1	1.19207
GO_ASTROCYTE_DIFFERENTIATION_Up	1	1	1	1	1	1	1	1.07443	1.4321	1.37963	1.13058	1.24917	1.13568	1.40816	1.12651	1.07339	1	1	1	1.37231	1.3847	1.25983	1	1	1	1	1	1	1	1	1	1	1.0584	1	1.05132	1.40419	1	1	1	1.16657	1	1.73279	1	1	1	1	1
GO_ATP_BIOSYNTHETIC_PROCESS_Down	1.12632	1	1.62394	1	1	1	1	1	1	1	1	1	1	1	1	1	1.02023	1	1.12648	1	1	1	1.19425	1.55296	1	1	1	1.01568	1	1	1	1	1	1	1	1	1	1	1	1.31566	1	1	1	1	1	1	1
GO_ATP_BIOSYNTHETIC_PROCESS_Up	1	1	1	1.27126	1	1.69224	1	1.16597	1.41694	1.55794	1.35295	2.02215	2.32156	2.41819	2.39672	1	1	1	1	1	1	2.23742	1	1	1	1	1.27023	1	1	1.34788	1	1.51425	1.15749	1	1.86194	1	1	1	1	1	1.568	1	1	1	1	1	1.20444
GO_ATP_DEPENDENT_CHROMATIN_REMODELING_Down	1	1.00782	1	1.52402	1.83182	1.21656	1	1	1.07891	2.176	2.20661	1.33469	1	1.32907	1	1	1	1	1	1.1629	1	1	1	1	1	1.37095	1	1	1	1.05809	1	1	1.30766	1	1	1	1	1.79525	1.11692	1	1	1.14429	1	1	1.20261	1	1
GO_ATP_DEPENDENT_CHROMATIN_REMODELING_Up	1	1	1	1	1	1	1	1	1	1	1	1	1.49407	1	1	1	1	1	1.40949	1	1	1	1.07588	1.05231	1.91901	1	1.25417	1.49351	1.55908	1	1	1	1	1	1	1	1.4261	1	1	1	1	1	1	1	1	1	1
GO_ATP_DEPENDENT_DNA_HELICASE_ACTIVITY_Down	1	1	1	1.59102	1.20939	1.80262	1	1.47145	1.0749	1.93967	1	1.62637	1	1.70847	1.44897	1	1.00812	1	1	1	1	1.12316	1	1	1	1	1.39723	1	1	1	1	1	1	1	1	1	1	1.86485	1.10442	1	1.02728	1.05564	1	1	1.22172	1	1
GO_ATP_DEPENDENT_DNA_HELICASE_ACTIVITY_Up	1	1	1.53057	1	1	1	1	1	1	1	1	1	1	1	1	1.1806	1	1	1	1	1	1	1	1.12971	1.69435	1.04578	1	1.30985	1.38629	1	1	1.81103	1	1.45824	1.57414	1.26955	1.00646	1	1	1	1	1	1	1	1	1	1
GO_ATP_GENERATION_FROM_ADP_Down	1	1	1.02312	1.26211	1	1	1.00205	1.12177	1	1	1	1	1	1	1	1	1	1	1.18733	1	1.03405	1	1.08144	1	1	1.88219	1.19781	1.33428	1.52404	1	1	1	1	1	1	1.25975	1	1	1	1.35466	1	1	1	1	1	1	1.24036
GO_ATP_GENERATION_FROM_ADP_Up	1	1.05701	1	1	1	1	1	1	1.62952	1.14356	1.18226	1	1	1	1	1	1	1	1	1	1	1	1	1	1.16502	1	1	1	1	1.09188	1	1	1.58167	1	1	1	1	1	1.36995	1	1	1	1.27481	1.44026	1.17369	1	1
GO_ATP_HYDROLYSIS_COUPLED_TRANSMEMBRANE_TRANSPORT_Down	1.4604	1.05987	1.54588	1	1	1	1.09028	1	1	1	1	1	1	1	1	1	1	1	1	1	1	1	1	1.00901	1.03402	1	1	1	1.17748	1	1	1	1	1.25812	1.064	1.31618	1.43131	1	1.12155	1	1	1	1	1	1	1	1
GO_ATP_HYDROLYSIS_COUPLED_TRANSMEMBRANE_TRANSPORT_Up	1	1	1	1	1.01826	1.33792	1	1.37248	1	1.25575	1.448	1.67893	1.39932	1.9333	1.72311	1	1	1	1	1	1	1.54111	1	1	1	1	1.04284	1	1	1.3289	1.68551	1	1.38844	1	1	1	1	1.14991	1	1	1	1	1	1	1	1.01689	1
GO_ATPASE_ACTIVITY_COUPLED_Down	1	1	1	1.31503	1	1.11556	1.28931	1.40351	1	1.42926	1	1.12305	1	1	1	1	1	1	1	1	1	1	1	1	1	1	1	1	1	1	1	1	1	1.44788	1	1	1	1	1	1.18373	1.43679	1.58265	1	1	1	1	1
GO_ATPASE_ACTIVITY_COUPLED_TO_MOVEMENT_OF_SUBSTANCES_Down	1	1	1.0665	1	1	1	1	1.16576	1.14346	1	1	1	1.04728	1	1	1	1	1	1.12726	1	1	1	1.0511	1	1	1	1	1	1	1	1	1	1	1.58951	1	1	1	1	1	1.56137	1.62556	1.88134	1	1	1	1	1.46626
GO_ATPASE_ACTIVITY_COUPLED_TO_MOVEMENT_OF_SUBSTANCES_Up	1.09796	1.04253	1	1	1.63957	1	1	1	1	1	1.41621	1	1	1	1	1.25855	1	1.15686	1	1.20104	1	1	1	1	1	1	1.09618	1	1	1	1.76587	1.5897	1.39149	1	1.11647	1.4493	1	1.04905	1	1	1	1	1	1	1.15783	1.66461	1
GO_ATPASE_ACTIVITY_COUPLED_TO_TRANSMEMBRANE_MOVEMENT_OF_IONS_PHOSPHORYLATIVE_MECHANISM_Down	1.08957	1.35843	1.02523	1	1	1	1.11979	1.23523	1	1	1	1	1.15591	1	1	1	1	1	1	1	1	1	1.15319	1	1	1	1	1	1.1393	1	1	1	1	1.36441	1	1	1	1	1	1.10681	1.36943	1.45232	1	1	1	1	1.14546
GO_ATPASE_ACTIVITY_COUPLED_TO_TRANSMEMBRANE_MOVEMENT_OF_IONS_PHOSPHORYLATIVE_MECHANISM_Up	1	1	1	1	1.10103	1	1	1	1	1	1.37428	1.22472	1	1	1	1	1	1	1	1.38456	1	1	1	1.11956	1	1	1	1	1	1	1.63852	1.00318	1	1	1	1	1	1	1	1	1	1	1	1.00689	1.28299	1.408	1
GO_ATPASE_ACTIVITY_COUPLED_Up	1	1	1.1633	1	1.09989	1	1	1	1	1	1.39942	1	1	1	1	1	1	1	1	1.02316	1	1	1	1	1.37724	1	1	1	1	1	1.40824	1.24566	1.16869	1	1.22259	1.29758	1	1	1	1	1	1	1	1	1	1.18294	1
GO_ATPASE_ACTIVITY_Down	1	1	1	1.14894	1	1.13879	1.20268	1.70377	1	1.68166	1	1.32852	1	1.23706	1.18486	1	1	1	1.1086	1	1.17269	1.15884	1	1.06407	1	1	1	1	1	1.02094	1	1	1	1.45885	1	1	1.05739	1	1	1.1516	1.70979	1.76462	1	1	1	1	1
GO_ATPASE_ACTIVITY_Up	1.13059	1	1.39178	1	1.04094	1	1	1	1	1	1.22617	1	1	1	1	1	1	1	1	1	1	1	1	1	1.4385	1	1	1	1.0781	1	1.26921	1.31215	1.16138	1	1.55227	1.35679	1	1	1.12616	1	1	1	1	1	1	1.13228	1
GO_ATPASE_BINDING_Down	1.34572	1.03401	1.29935	1	1	1	1	1	1	1	1	1	1	1	1	1	1	1	1	1	1	1	1	1	1	1	1	1	1	1	1	1	1	1	1.19275	1	1	1	1	1	1	1	1	1	1	1	1.27118
GO_ATPASE_BINDING_Up	1	1	1	1	1	1	1	1	1	1	1	1.15328	1.27823	1.04668	1.17757	1	1	1	1	1	1	1	1	1	1	1	1	1.02389	1	1	1	1	1	1	1	1	1.36396	1	1	1	1	1	1.02893	1	1	1.54499	1
GO_ATPASE_COUPLED_ION_TRANSMEMBRANE_TRANSPORTER_ACTIVITY_Down	1.23141	1.0215	1.44728	1	1	1	1	1	1	1	1	1	1	1	1	1	1	1	1	1	1	1	1.26041	1	1.02775	1	1	1	1	1	1	1	1	1.36993	1	1	1	1	1	1.38058	1.14039	1.51306	1	1	1	1	1.07448
GO_ATPASE_COUPLED_ION_TRANSMEMBRANE_TRANSPORTER_ACTIVITY_Up	1	1	1	1	1.52796	1.15051	1	1	1	1.07222	1.34435	1.16316	1.1075	1.37799	1.18123	1	1	1	1	1.08105	1	1	1	1	1	1	1	1	1	1.01275	1.77031	1.41532	1.19824	1	1	1.11436	1	1.05324	1	1	1	1	1.01808	1	1.03879	1.51971	1
GO_ATPASE_REGULATOR_ACTIVITY_Down	1.20602	1	1.02328	1.00862	1	1	1	1	1	1	1	1	1	1	1	1	1.29415	1	1	1	1	1	1	1	1	1	1	1	1	1	1	1	1	1	1.07598	1.03183	1	1	1.14846	1	1	1	1	1	1	1	1
GO_ATPASE_REGULATOR_ACTIVITY_Up	1	1	1	1	1	1	1	1	1	1.01907	1	1.64955	1.49422	1.07682	1.31165	1	1	1	1	1.05987	1.33032	1.20639	1	1	1	1.04126	1	1	1	1	1.0495	1	1	1	1	1	1	1	1	1	1.3056	1.20331	1.04942	1	1	1.24728	1
GO_AU_RICH_ELEMENT_BINDING_Down	1	1	1	1.53246	1	1.57165	1	1.06116	1.43726	1.36281	1.0729	1	1	1	1	1.01946	1.02956	1.34503	1	1	1	1	1	1	1	1	1	1	1	1	1	1	1	1	1	1	1	1	1	1	1	1	1	1	1	1	1.40549
GO_AU_RICH_ELEMENT_BINDING_Up	1	1	1	1	1	1	1	1	1	1	1	1	1	1	1	1	1	1	1	1.25925	1.31974	1	1	1	1.10949	1	1	1.0655	1.00694	1	1	1	1	1	1	1	1.24764	1	1	1	1	1.23146	1	1	1	1	1
GO_AUDITORY_RECEPTOR_CELL_DIFFERENTIATION_Down	1	1	1	1	1	1	1	1	1	1	1	1	1	1	1	1	1	1	1	1	1	1	1	1.3391	1	1	1	1	1	1.69411	1	1	1.22491	1	1	1	1	1	1	1	1	1	1	1	1	1	1
GO_AUDITORY_RECEPTOR_CELL_DIFFERENTIATION_Up	1	1	1	1	1	1	1.09745	1	1	1.1402	1	1	1.23574	1.12191	1.0816	1	1.25242	1.10711	1	1	1	1.19471	1	1	1.31962	1.37179	1.46339	1.1959	1.04836	1	1	1	1	1	1.44933	1.42355	1.03812	1	1	1.17721	1	1.58284	1	1.15429	1	1	1
GO_AUTONOMIC_NERVOUS_SYSTEM_DEVELOPMENT_Down	1	1	1	1.0515	1	1	1	1	1.13129	1.56736	2.0784	1.83263	1	1	1	1	1.08237	1	1	1	1	1	1	1	1.15029	1	1.31378	1.00587	1.47367	1	1	1	1	1	1	1	1	1	1	1	1.6896	1	1	1	1	1.54733	1.92687
GO_AUTONOMIC_NERVOUS_SYSTEM_DEVELOPMENT_Up	1	1	1	1	1.41887	1	1.79141	1	1	1	1	1	2.06423	1.40057	1.94161	1.42011	1	1.68518	1	1	1	1.54048	1	1	1	1	1	1	1	1	1	1.32112	1.06195	1	1	1	1.5278	1	1	1.9981	1	1	1	1.25537	1.08425	1	1
GO_AUTOPHAGOSOME_Down	1	1	1	1	1	1	1	1	1	1	1	1	1	1.20519	1	1	1	1	1	1	1	1	1	1.32369	1	1	1	1	1	1	1	1	1	1	1	1	1	1	1	1.00249	1	1	1	1	1	1	1
GO_AUTOPHAGOSOME_MEMBRANE_Down	1	1	1.05607	1	1.25197	1	1	1	1	1	1	1	1	1.01893	1	1	1	1	1	1	1	1	1.23603	1	1	1	1	1	1	1	1	1	1	1.02412	1	1	1	1	1	1.18525	1	1	1	1	1	1	1
GO_AUTOPHAGOSOME_MEMBRANE_Up	1	1	1	1	1	1.23345	1	1.28347	1.38987	1.36183	1.29086	1	1	1	1	1	1	1	1.28254	1	1	1	1	1	1	1	1.45892	1	1	1	1	1	1.47191	1	1	1.01243	1	1.2003	1	1	1	1	1	1	1	1	1
GO_AUTOPHAGOSOME_ORGANIZATION_Down	1	1	1	1	1.3341	1	1	1	1	1	1	1	1	1.18879	1	1	1	1	1	1.60254	1.02871	1.15457	1	1	1	1	1	1	1	1	1	1	1	1	1	1	1	1	1	1	1	1	1	1	1	1	1
GO_AUTOPHAGOSOME_ORGANIZATION_Up	1	1	1	1	1	1	1	1.31132	1	1.03986	1	1	1	1	1	1	1	1	1	1	1	1	1	1	1	1	1	1	1	1	1	1	1	1	1.01486	1.0083	1	1.33047	1	1.04789	1.15452	1.30553	1	1	1	1	1
GO_AUTOPHAGOSOME_Up	1	1	1	1	1	1	1	1	1	1.23969	1.17423	1.00988	1	1	1	1	1	1	1	1	1	1	1	1	1	1	1.14635	1	1	1	1	1	1.0968	1	1	1	1	1.28396	1	1	1	1	1	1	1	1	1
GO_AUTOPHAGY_Down	1.02912	1	1	1	1	1	1	1	1	1	1	1	1	1	1	1	1	1	1	1	1	1	1	1	1	1	1	1	1	1	1.11793	1	1	1	1	1	1	1	1	1	1	1	1	1	1	1	1
GO_AUTOPHAGY_Up	1	1	1	1	1	1.12158	1	1	1.12168	1.0877	1	1	1.09347	1.03559	1.04343	1	1	1	1	1	1	1	1	1.0202	1	1.13022	1	1	1	1	1	1	1	1	1.08962	1	1	1.19082	1	1	1.03665	1.12708	1	1	1	1	1
GO_AXIS_ELONGATION_Down	1	1	1	1	1	1	1	1	1	1	1	1.56826	1.43975	1	1.56751	1	1	1	1	1	1	1	1	1.50572	1	1	1	1	1	1	1	1.26959	1	1	1	1	1	1	1	1	1.49146	1	1	1	1	1	1
GO_AXIS_ELONGATION_Up	1	1	1	1	1	1	1.41579	1.14526	1	1	1.22019	1	1	1	1	1.08614	1	1.09114	1.14167	1	1	1	1	1	1.17116	1	1	1	1	1	1	1	1	1	1	1	1	1	1	1.27692	1	1.2674	1	1.73216	1.60823	1	1
GO_AXIS_SPECIFICATION_Down	1.29044	1.47637	1.08755	1.26311	1	1.5868	1	1	1	1	1.22346	1	1	1	1	1	1.31668	1	1.57382	1	1.08469	1	1	1.22994	1	1	1	1	1	1.58379	1	1.19036	1.2307	1.2285	1	1	1	1	1	1	1.58324	1	1	1	1	1	1.03483
GO_AXIS_SPECIFICATION_Up	1	1	1	1	1	1	1.57098	1	1	1.19004	1	1	1.06296	1.23151	1.16984	1.54064	1	1.41234	1	1.43726	1	1.46343	1	1	1.36242	1	1.01853	1	1.43982	1	1.03909	1	1	1	1.40226	1.42419	1.29078	1	1	1.59306	1	1.42428	1	1.36862	1.18188	1.07658	1
GO_AXO_DENDRITIC_TRANSPORT_Down	1	1	1	1	1	1	1.69658	1.34127	1	1	1	1	1	1	1	1.26279	1	1.26049	1	1	1	1	1.63509	1	1.02325	1	1	1.31008	1	1.32242	1.0841	1	1	1.32096	1	1	1	1	1.23466	1	1	1	1	1.31239	1	1	1.45765
GO_AXO_DENDRITIC_TRANSPORT_Up	1.00982	1.014	1	1	1	1.74238	1	1	1.07561	1	1	1	1.00776	1.06455	1.30328	1	1	1	1.0066	1	1	1.01256	1	1	1	1	1	1	1	1	1	1	1	1	1	1	1	1	1	1	1	1	1	1	1	1	1
GO_AXON_CYTOPLASM_Down	1	1	1	1	1	1	1.62857	1.09377	1	1	1	1	1	1	1	1.32397	1	1.11317	1	1	1	1	1.60435	1	1	1	1	1.10244	1	1	1.04053	1	1	1.17715	1	1	1	1	1	1	1	1	1	1.09093	1.00922	1	1.35748
GO_AXON_CYTOPLASM_Up	1	1	1	1	1	1.56606	1	1	1	1	1	1	1.04326	1.11923	1.2979	1	1	1	1.163	1	1	1.04158	1	1	1	1	1	1	1	1	1	1	1	1	1	1	1	1.14876	1	1	1	1	1	1	1	1	1
GO_AXON_Down	1	1.00995	1	1	1	1	1.03549	1.87033	1	1	1	1	1.52495	1.12981	1.32126	1.86805	1	1.50368	1	1	1	1.28368	1.36264	1	1.69697	1	1	1.47516	1.78066	1.45051	1	1.31967	1	1.44727	1.5054	1.14895	1	1	1	1.03814	1.46372	1.51671	1	1.52962	1	1	1.47533
GO_AXON_EXTENSION_Down	1	1	1	1	1	1	1	1.60005	1.86582	1.64513	1.83924	1.86795	1.91297	1	1	1.44113	1	1	1.0812	1	1	1	1	1	1	1	1	1	1	1.54144	1	1	1	1.65054	1.82747	1	1.00151	1	1	1	1.56945	1.19932	1	1	1	1.27726	1.58761
GO_AXON_EXTENSION_Up	1.24155	1	1.33564	1	1	1.08991	1.55617	1	1	1	1	1	1	1	1.44592	1	1.94601	1.51637	1	1.75201	1.64432	1.12248	1	1	1	1	1	1	1.16015	1	1.84318	1.00022	1.08419	1	1	1.29734	1	1	1	1.3025	1	1	1	1.22835	1	1	1
GO_AXON_PART_Down	1	1	1	1	1	1	1	1.77299	1	1	1	1	1.36674	1	1.14572	1.81833	1	1.67051	1	1.34564	1	1.32751	1.39823	1	1.56795	1	1	1.45832	1.73724	1.44764	1	1.36271	1	1.53244	1.64216	1.17663	1	1	1.08171	1	1.27171	1.22331	1.08781	1.46677	1	1	1.50283
GO_AXON_PART_Up	1	1	1	1.12124	1	1.7039	1	1	1	1.00703	1.1989	1.12669	1	1	1	1	1.37892	1	1.35215	1	1	1	1	1	1	1	1	1	1	1	1	1	1.09181	1	1	1	1.4614	1	1	1.02601	1	1	1	1	1.08742	1.12785	1
GO_AXON_REGENERATION_Down	1	1	1	1	1	1	1	1	1	1	1	1.13057	1	1	1	1	1.33404	1.3554	1.40023	1	1	1.13358	1	1.02579	1	1	1	1	1.1871	1	1	1	1	1	1	1	1	1	1	1	1.91574	1	1	1	1	1	1
GO_AXON_REGENERATION_Up	1	1	1	1	1	1	1.34614	1	1.00322	1	1	1	1	1	1.35718	1	1	1	1	1.29895	1	1	1	1	1.2162	1	1	1	1	1	1	1	1	1	1	1	1	1	1	1.95299	1	1	1	1	1	1	1
GO_AXON_Up	1	1	1	1.04869	1	1.67208	1	1	1	1	1	1.08348	1	1	1	1	1.58109	1	1.44013	1	1.01337	1	1	1	1	1	1	1	1	1	1	1	1	1	1	1	1.45026	1.04022	1	1	1	1	1	1	1.00934	1.04428	1
GO_AXONAL_FASCICULATION_Down	1	1	1	1	1.52481	1	1.17631	1.37154	1	1.65153	1.12997	1.70495	1.61713	1.61548	1.72354	1.55071	1	1.18113	1	1	1	1.68431	1	1	1	1	1	1	1.26944	1	1	1	1	1	1	1	1	1	1	1	1.83425	1.59051	1	1	1	1	1
GO_AXONAL_FASCICULATION_Up	1	1	1	1	1	1	1	1	1	1	1	1	1	1	1	1	1.17431	1	1	1	1	1	1	1.16513	1	1	1	1	1	1	1	1	1	1	1	1	1	1	1	1	1	1	1	1	1.04676	1	1
GO_AXONEME_ASSEMBLY_Down	1	1	1	1	1	1	1	2.11471	1.2039	1	1	1.12565	1	1	1	1.08903	1	1	1.9698	1	2.18456	1.29851	1	1.58731	1	1.39898	1	1	1	1	1	1	1	1	1	1	1	1	1	1.164	1.76701	1.67493	1	1	1	1	1
GO_AXONEME_ASSEMBLY_Up	1	1	1	1	1.61071	1	1	1	1	1	2.00287	1	1	1.7025	1.36628	1	1.03948	1	1	1	1	1	1	1	1.03931	1	1.36837	1.4985	2.07952	1	1	1	1	1	1	1	1	1	1	1	1	1	1	1	1.16755	1.24834	1
GO_B_CELL_ACTIVATION_Down	1.12013	1.28641	1.1279	1	1	1.31728	1	1.17139	1.30334	1	1.08776	1	1.09955	1	1	1.0088	1	1	1.13546	1	1	1	1.38528	1	1	1.28502	1.04933	1.18066	1.2275	1.03131	1.06428	1	1	1.14264	1	1	1	1	1	1.16831	1.65788	1.47373	1	1	1	1	1
GO_B_CELL_ACTIVATION_INVOLVED_IN_IMMUNE_RESPONSE_Down	1	1	1	1	1	1.56337	1	1	1	1	1	1	1	1	1	1.13533	1	1	1	1	1	1	1.43496	1	1	1.38621	1	1	1.37263	1	1.03415	1	1	1	1	1	1	1	1.32514	1	1.18663	1.24574	1	1	1	1	1
GO_B_CELL_ACTIVATION_INVOLVED_IN_IMMUNE_RESPONSE_Up	1	1	1	1	1	1	1	1.36832	1.30022	1.05853	1	1	1	1	1	1	1.33313	1.10206	1	1	1	1.29397	1	1.41001	1.45132	1	1.33019	1	1	1	1	1.11302	1.63828	1	1	1.08801	1.2713	1	1	1	1	1	1	1	1	1.09373	1
GO_B_CELL_ACTIVATION_Up	1	1	1	1	1.07325	1	1.13113	1	1	1	1	1	1	1	1	1	1.17467	1.28848	1	1.04844	1	1	1	1.19158	1.00266	1	1	1	1	1	1	1.14041	1.39941	1	1.24513	1.16096	1.1047	1	1.04403	1	1	1	1.06503	1.05463	1.14147	1.31502	1
GO_B_CELL_DIFFERENTIATION_Down	1	1	1	1.03005	1	1.30373	1	1.09157	1.4406	1.12128	1.14172	1.13513	1.56761	1.07203	1.26165	1.01055	1	1	1	1	1	1	1.32651	1	1	1.30574	1	1.19637	1.3176	1.19668	1	1	1	1.02161	1	1	1	1	1	1.17547	1.40682	1.15875	1	1	1	1	1
GO_B_CELL_DIFFERENTIATION_Up	1	1.06932	1	1	1	1	1.09532	1	1	1	1	1	1	1	1	1	1.22118	1.18071	1	1.04614	1	1	1	1.20105	1.13006	1	1.1565	1	1	1	1	1.15485	1.1261	1	1.04543	1.11	1.15254	1	1.31034	1	1	1	1.18698	1.07106	1	1.05691	1
GO_B_CELL_MEDIATED_IMMUNITY_Down	1	1	1.05695	1	1	1.02274	1	1	1	1	1	1	1	1	1	1	1	1	1.09951	1	1	1	1	1.01109	1.04648	1	1	1	1	1	1	1	1	1	1.77704	1	1	1	1	1	1.20604	1	1	1	1	1	1.08617
GO_B_CELL_MEDIATED_IMMUNITY_Up	1	1	1	1	1.75975	1	1.62539	1.12017	1	2.10613	1.33658	1.7286	1.3646	1.49238	1.22503	1.19275	1.10356	1.38363	1	1.66543	1.3897	1.76815	1	1	1	1	1.07828	1	1.18646	1.16579	1.23394	1	1.27831	1.29046	1	1	1	1.3383	1	1	1	1	1.4788	1.08872	1.5227	1.50918	1
GO_B_CELL_RECEPTOR_SIGNALING_PATHWAY_Down	1	1	1	1	1	1	1	1	1.16546	1	1	1	1	1	1	1.04501	1	1	1.26474	1.15827	1.26519	1	1.27334	1.32285	1.08303	1.19513	1	1.47747	1.11056	1	1	1	1	1.27478	1	1	1	1	1	1.72102	1.13736	1.58922	1	1	1	1	1
GO_B_CELL_RECEPTOR_SIGNALING_PATHWAY_Up	1	1	1	1	1.55606	1	1	1	1	1	1	1	1	1	1	1	1.03092	1	1	1	1	1	1	1	1	1	1	1	1	1.06479	1	1.52862	1.63056	1	1.52415	1	1	1.00695	1.04484	1	1	1	1	1	1	1	1
GO_BAF_TYPE_COMPLEX_Down	1	1	1	1	1.84062	1	1	1.51028	1	1.83962	1.89366	1.55454	1	1.35759	1.06094	1	1	1	1	1	1	1.03781	1	1	1	1.21233	1.4491	1	1.21608	1.58018	1.29928	1	1.23182	1	1	1	1	1	1	1	1	1	1	1	1.12519	1.28454	1
GO_BAF_TYPE_COMPLEX_Up	1	1	1	1	1	1.37713	1	1	1	1	1	1	1	1	1	1	1	1	1	1	1	1	1	1	1.101	1	1	1	1	1	1	1	1	1	1	1.64446	1.44362	1	1	1	1	1	1	1	1	1	1
GO_BASAL_PART_OF_CELL_Down	1	1	1	1	1	1.05622	1	1.44788	1.46057	1.17731	1.09142	1.61357	2.02601	1.1476	1.73163	1	1	1	1.3676	1	1	1.43421	1	1.15024	1	1.33784	1	1	1	1.1201	1	1	1	1	1	1	1	1	1.06778	1.45509	1.58083	1.52284	1	1	1	1	1.35703
GO_BASAL_PART_OF_CELL_Up	1.18494	1.42795	1	1.57828	1.52059	1	1.72169	1	1	1	1	1	1	1	1	1	1.07313	1.20909	1	1.57131	1	1	1	1	1.21936	1	1.31073	1	1	1	1.16853	1.19362	1.06711	1	1.02074	1.54853	1.01966	1	1	1	1	1	1.18084	1.72766	1.54975	1.49251	1
GO_BASAL_PLASMA_MEMBRANE_Down	1	1	1	1	1	1	1	1.47895	1	1	1	1.28299	2.04232	1.36331	1.7769	1.0007	1	1	1.28968	1	1	1.6143	1	1.18897	1	1	1	1	1.39951	1	1	1	1	1	1	1	1	1	1	1.3845	1.45728	1.24154	1	1	1	1	1
GO_BASAL_PLASMA_MEMBRANE_Up	1	1	1	1	1.4853	1	1.7	1	1	1	1	1	1	1	1	1	1.341	1	1	1.41955	1	1	1	1	1.48467	1	1.41297	1	1	1	1	1	1	1	1	1	1	1	1	1	1	1	1	1.42448	1.29641	1.42548	1
GO_BASAL_TRANSCRIPTION_MACHINERY_BINDING_Down	1.1144	1.53051	1	1	1.35356	1	1	1.30282	1.21806	1.30665	1.00059	1.30389	1	1	1	1	1	1	1	1	1	1	1	1	1	1	1.27011	1	1	1	1	1	1	1	1	1.2164	1	1	1	1	1	1	1	1	1	1	1
GO_BASAL_TRANSCRIPTION_MACHINERY_BINDING_Up	1	1	1	1	1	1.0047	1	1	1	1	1	1	1.03755	1	1	1	1	1	1	1	1	1	1	1.23984	1.22069	1.05498	1	1	1	1	1	1	1.13378	1	1	1	1	1	1	1	1	1	1	1	1	1	1
[truncated: 11,343 more rows]
